# Supplementary material
Source: MDPI journal article supplement (https://www.mdpi.com/2304-6740/11/12/473)

---

The following ALERTS were generated. Each ALERT has the format

**test-name\_ALERT\_alert-type\_alert-level.**

Click on the hyperlinks for more details of the test.

---

### ● Alert level G

|                                                                    |              |
|--------------------------------------------------------------------|--------------|
| PLAT899_ALERT_4_G SHELXL2018 is Deprecated and Succeeded by SHELXL | 2019/3 Note  |
| PLAT961_ALERT_5_G Dataset Contains no Negative Intensities .....   | Please Check |
| PLAT967_ALERT_5_G Note: Two-Theta Cutoff Value in Embedded .res .. | 56.0 Degree  |
| PLAT978_ALERT_2_G Number C-C Bonds with Positive Residual Density. | 3 Info       |

---

0 **ALERT level A** = Most likely a serious problem - resolve or explain  
0 **ALERT level B** = A potentially serious problem, consider carefully  
0 **ALERT level C** = Check. Ensure it is not caused by an omission or oversight  
4 **ALERT level G** = General information/check it is not something unexpected

0 ALERT type 1 CIF construction/syntax error, inconsistent or missing data  
1 ALERT type 2 Indicator that the structure model may be wrong or deficient  
0 ALERT type 3 Indicator that the structure quality may be low  
1 ALERT type 4 Improvement, methodology, query or suggestion  
2 ALERT type 5 Informative message, check

---

## Datablock: compound-2-primeprime

---

Bond precision: C-C = 0.0018 A

Wavelength=0.71073

|              |             |                 |               |
|--------------|-------------|-----------------|---------------|
| Cell:        | a=8.4988(8) | b=17.5628(15)   | c=11.3833(11) |
|              | alpha=90    | beta=101.860(7) | gamma=90      |
| Temperature: | 200 K       |                 |               |

|                        | Calculated       | Reported         |
|------------------------|------------------|------------------|
| Volume                 | 1662.8(3)        | 1662.8(3)        |
| Space group            | C 2/c            | C 2/c            |
| Hall group             | -C 2yc           | -C 2yc           |
| Moiety formula         | C10 H8 Cl4 N8 Si | C10 H8 Cl4 N8 Si |
| Sum formula            | C10 H8 Cl4 N8 Si | C10 H8 Cl4 N8 Si |
| Mr                     | 410.13           | 410.13           |
| Dx, g cm <sup>-3</sup> | 1.638            | 1.638            |
| Z                      | 4                | 4                |
| Mu (mm <sup>-1</sup> ) | 0.794            | 0.794            |
| F000                   | 824.0            | 824.0            |
| F000'                  | 826.83           |                  |
| h,k,lmax               | 12,26,16         | 12,26,16         |
| Nref                   | 2897             | 2896             |
| Tmin,Tmax              | 0.842,0.909      | 0.859,0.936      |
| Tmin'                  | 0.840            |                  |

Correction method= # Reported T Limits: Tmin=0.859 Tmax=0.936  
AbsCorr = INTEGRATION

Data completeness= 1.000                      Theta (max)= 31.997

```
R(reflections)= 0.0290( 2346)      wR2(reflections)=
S = 1.082                        0.0723( 2896)
Npar= 106
```

The following ALERTS were generated. Each ALERT has the format **test-name\_ALERT\_alert-type\_alert-level**. Click on the hyperlinks for more details of the test.

● Alert level C

|                                                                   |             |
|-------------------------------------------------------------------|-------------|
| PLAT906_ALERT_3_C Large K Value in the Analysis of Variance ..... | 2.237 Check |
|-------------------------------------------------------------------|-------------|

Alert level G

|                   |                                                  |      |              |
|-------------------|--------------------------------------------------|------|--------------|
| PLAT910_ALERT_3_G | Missing # of FCF Reflection(s) Below Theta(Min). | 1    | Note         |
| PLAT961_ALERT_5_G | Dataset Contains no Negative Intensities .....   |      | Please Check |
| PLAT967_ALERT_5_G | Note: Two-Theta Cutoff Value in Embedded .res .. | 64.0 | Degree       |
| PLAT978_ALERT_2_G | Number C-C Bonds with Positive Residual Density. | 4    | Info         |

- ```

0 ALERT level A = Most likely a serious problem - resolve or explain
0 ALERT level B = A potentially serious problem, consider carefully
1 ALERT level C = Check. Ensure it is not caused by an omission or oversight
4 ALERT level G = General information/check it is not something unexpected

0 ALERT type 1 CIF construction/syntax error, inconsistent or missing data
1 ALERT type 2 Indicator that the structure model may be wrong or deficient
2 ALERT type 3 Indicator that the structure quality may be low
0 ALERT type 4 Improvement, methodology, query or suggestion
2 ALERT type 5 Informative message, check

```

**Datablock: compound-1,5-3**

|                 |                |                    |              |
|-----------------|----------------|--------------------|--------------|
| Bond precision: | C-C = 0.0016 A | Wavelength=0.71073 |              |
| Cell:           | a=9.1259 (3)   | b=11.9037 (3)      | c=9.7351 (4) |
|                 | alpha=90       | beta=99.034 (3)    | gamma=90     |
| Temperature:    | 180 K          |                    |              |

|                        | Calculated   | Reported   |
|------------------------|--------------|------------|
| Volume                 | 1044.43(6)   | 1044.42(6) |
| Space group            | P 21/n       | P 21/n     |
| Hall group             | -P 2yn       | -P 2yn     |
| Moiety formula         | C13 H10 N4   | C13 H10 N4 |
| Sum formula            | C13 H10 N4   | C13 H10 N4 |
| Mr                     | 222.25       | 222.25     |
| Dx, g cm <sup>-3</sup> | 1.413        | 1.413      |
| Z                      | 4            | 4          |
| Mu (mm <sup>-1</sup> ) | 0.090        | 0.090      |
| F000                   | 464.0        | 464.0      |
| F000'                  | 464.14       |            |
| h, k, lmax             | 12, 15, 12   | 12, 15, 12 |
| Nref                   | 2508         | 2508       |
| Tmin, Tmax             | 0.963, 0.973 |            |
| Tmin'                  | 0.947        |            |

Correction method= Not given

Data completeness= 1.000

Theta(max)= 27.989

R(reflections)= 0.0374( 2271)

wR2(reflections)=  
0.0922( 2508)

S = 1.075

Npar= 155

The following ALERTS were generated. Each ALERT has the format

**test-name\_ALERT\_alert-type\_alert-level.**

Click on the hyperlinks for more details of the test.

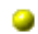

#### Alert level C

PLAT906\_ALERT\_3\_C Large K Value in the Analysis of Variance ..... 2.232 Check

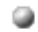

#### Alert level G

PLAT899\_ALERT\_4\_G SHELXL2018 is Deprecated and Succeeded by SHELXL 2019/3 Note  
 PLAT913\_ALERT\_3\_G Missing # of Very Strong Reflections in FCF .... 1 Note  
 PLAT961\_ALERT\_5\_G Dataset Contains no Negative Intensities ..... Please Check  
 PLAT967\_ALERT\_5\_G Note: Two-Theta Cutoff Value in Embedded .res .. 56.0 Degree  
 PLAT978\_ALERT\_2\_G Number C-C Bonds with Positive Residual Density. 14 Info

- 0 **ALERT level A** = Most likely a serious problem - resolve or explain
- 0 **ALERT level B** = A potentially serious problem, consider carefully
- 1 **ALERT level C** = Check. Ensure it is not caused by an omission or oversight
- 5 **ALERT level G** = General information/check it is not something unexpected

0 ALERT type 1 CIF construction/syntax error, inconsistent or missing data

1 ALERT type 2 Indicator that the structure model may be wrong or deficient  
2 ALERT type 3 Indicator that the structure quality may be low  
1 ALERT type 4 Improvement, methodology, query or suggestion  
2 ALERT type 5 Informative message, check

---

## Datablock: compound-1,4-3

---

Bond precision: C-C = 0.0030 Å

Wavelength=0.71073

Cell: a=5.6770(4) b=7.1648(5) c=13.4102(11)  
alpha=75.071(6) beta=79.636(6) gamma=89.686(6)  
Temperature: 180 K

|                        | Calculated   | Reported   |
|------------------------|--------------|------------|
| Volume                 | 517.96(7)    | 517.96(7)  |
| Space group            | P -1         | P -1       |
| Hall group             | -P 1         | -P 1       |
| Moiety formula         | C13 H10 N4   | C13 H10 N4 |
| Sum formula            | C13 H10 N4   | C13 H10 N4 |
| Mr                     | 222.25       | 222.25     |
| Dx, g cm <sup>-3</sup> | 1.425        | 1.425      |
| Z                      | 2            | 2          |
| Mu (mm <sup>-1</sup> ) | 0.090        | 0.090      |
| F000                   | 232.0        | 232.0      |
| F000'                  | 232.07       |            |
| h, k, lmax             | 7, 8, 16     | 7, 8, 16   |
| Nref                   | 2019         | 7244       |
| Tmin, Tmax             | 0.994, 0.996 |            |
| Tmin'                  | 0.914        |            |

Correction method= Not given

Data completeness= 3.588

Theta(max)= 25.989

R(reflections)= 0.0488( 5459)

wR2(reflections)=  
0.1323( 7244)

S = 1.052

Npar= 156

---

The following ALERTS were generated. Each ALERT has the format

**test-name\_ALERT\_alert-type\_alert-level.**

Click on the hyperlinks for more details of the test.

---

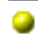

**Alert level C**

PLAT906\_ALERT\_3\_C Large K Value in the Analysis of Variance ..... 2.635 Check

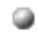

#### Alert level G

PLAT063\_ALERT\_4\_G Crystal Size Possibly too Large for Beam Size .. 1.00 mm  
PLAT154\_ALERT\_1\_G The s.u.'s on the Cell Angles are Equal ..(Note) 0.006 Degree  
PLAT870\_ALERT\_4\_G ALERTS Related to Twinning Effects Suppressed .. ! Info  
PLAT899\_ALERT\_4\_G SHELXL2018 is Deprecated and Succeeded by SHELXL 2019/3 Note  
PLAT912\_ALERT\_4\_G Missing # of FCF Reflections Above STh/L= 0.600 1 Note  
PLAT913\_ALERT\_3\_G Missing # of Very Strong Reflections in FCF .... 1 Note  
PLAT931\_ALERT\_5\_G CIFcalcFCF Twin Law [ 1 0 0] Est.d BASF 0.38 Check  
PLAT931\_ALERT\_5\_G CIFcalcFCF Twin Law [ 1 0 0] Est.d BASF 0.38 Check  
PLAT931\_ALERT\_5\_G CIFcalcFCF Twin Law [ 1 0 0] Est.d BASF 0.38 Check  
PLAT941\_ALERT\_3\_G Average HKL Measurement Multiplicity ..... 3.6 Low  
PLAT961\_ALERT\_5\_G Dataset Contains no Negative Intensities ..... Please Check  
PLAT967\_ALERT\_5\_G Note: Two-Theta Cutoff Value in Embedded .res .. 52.0 Degree

- 
- 0 **ALERT level A** = Most likely a serious problem - resolve or explain  
0 **ALERT level B** = A potentially serious problem, consider carefully  
1 **ALERT level C** = Check. Ensure it is not caused by an omission or oversight  
12 **ALERT level G** = General information/check it is not something unexpected

- 1 ALERT type 1 CIF construction/syntax error, inconsistent or missing data  
0 ALERT type 2 Indicator that the structure model may be wrong or deficient  
3 ALERT type 3 Indicator that the structure quality may be low  
4 ALERT type 4 Improvement, methodology, query or suggestion  
5 ALERT type 5 Informative message, check
- 

## checkCIF publication errors

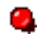

#### Alert level A

PUBL004\_ALERT\_1\_A The contact author's name and address are missing,  
\_publ\_contact\_author\_name and \_publ\_contact\_author\_address.  
PUBL005\_ALERT\_1\_A \_publ\_contact\_author\_email, \_publ\_contact\_author\_fax and  
\_publ\_contact\_author\_phone are all missing.  
At least one of these should be present.  
PUBL006\_ALERT\_1\_A \_publ\_requested\_journal is missing  
e.g. 'Acta Crystallographica Section C'  
PUBL008\_ALERT\_1\_A \_publ\_section\_title is missing. Title of paper.  
PUBL009\_ALERT\_1\_A \_publ\_author\_name is missing. List of author(s) name(s).  
PUBL010\_ALERT\_1\_A \_publ\_author\_address is missing. Author(s) address(es).  
PUBL012\_ALERT\_1\_A \_publ\_section\_abstract is missing.  
Abstract of paper in English.

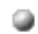

#### Alert level G

PUBL017\_ALERT\_1\_G The \_publ\_section\_references section is missing or  
empty.

- 
- 7 **ALERT level A** = Data missing that is essential or data in wrong format  
1 **ALERT level G** = General alerts. Data that may be required is missing

---

## Publication of your CIF

You should attempt to resolve as many as possible of the alerts in all categories. Often the minor alerts point to easily fixed oversights, errors and omissions in your CIF or refinement strategy, so attention to these fine details can be worthwhile. In order to resolve some of the more serious problems it may be necessary to carry out additional measurements or structure refinements. However, the nature of your study may justify the reported deviations from journal submission requirements and the more serious of these should be commented upon in the discussion or experimental section of a paper or in the "special\_details" fields of the CIF. *checkCIF* was carefully designed to identify outliers and unusual parameters, but every test has its limitations and alerts that are not important in a particular case may appear. Conversely, the absence of alerts does not guarantee there are no aspects of the results needing attention. It is up to the individual to critically assess their own results and, if necessary, seek expert advice.

If level A alerts remain, which you believe to be justified deviations, and you intend to submit this CIF for publication in a journal, you should additionally insert an explanation in your CIF using the Validation Reply Form (VRF) below. This will allow your explanation to be considered as part of the review process.

## Validation response form

Please find below a validation response form (VRF) that can be filled in and pasted into your CIF.

```
# start Validation Reply Form
_vrf_PUBL004_GLOBAL
;
PROBLEM: The contact author's name and address are missing,
RESPONSE: ...
;
_vrf_PUBL005_GLOBAL
;
PROBLEM: _publ_contact_author_email, _publ_contact_author_fax and
RESPONSE: ...
;
_vrf_PUBL006_GLOBAL
;
PROBLEM: _publ_requested_journal is missing
RESPONSE: ...
;
_vrf_PUBL008_GLOBAL
;
PROBLEM: _publ_section_title is missing. Title of paper.
RESPONSE: ...
;
_vrf_PUBL009_GLOBAL
;
PROBLEM: _publ_author_name is missing. List of author(s) name(s).
RESPONSE: ...
;
_vrf_PUBL010_GLOBAL
;
```

```

PROBLEM: _publ_author_address is missing. Author(s) address(es) .
RESPONSE: ...
;
_vrf_PUBL012_GLOBAL
;
PROBLEM: _publ_section_abstract is missing.
RESPONSE: ...
;
# end Validation Reply Form

```

If you wish to submit your CIF for publication in Acta Crystallographica Section C or E, you should upload your CIF via the web. If you wish to submit your CIF for publication in IUCrData you should upload your CIF via the web. If your CIF is to form part of a submission to another IUCr journal, you will be asked, either during electronic submission or by the Co-editor handling your paper, to upload your CIF via our web site.

---

**PLATON version of 06/07/2023; check.def file version of 30/06/2023**

Datablock compound-2-prime - ellipsoid plot

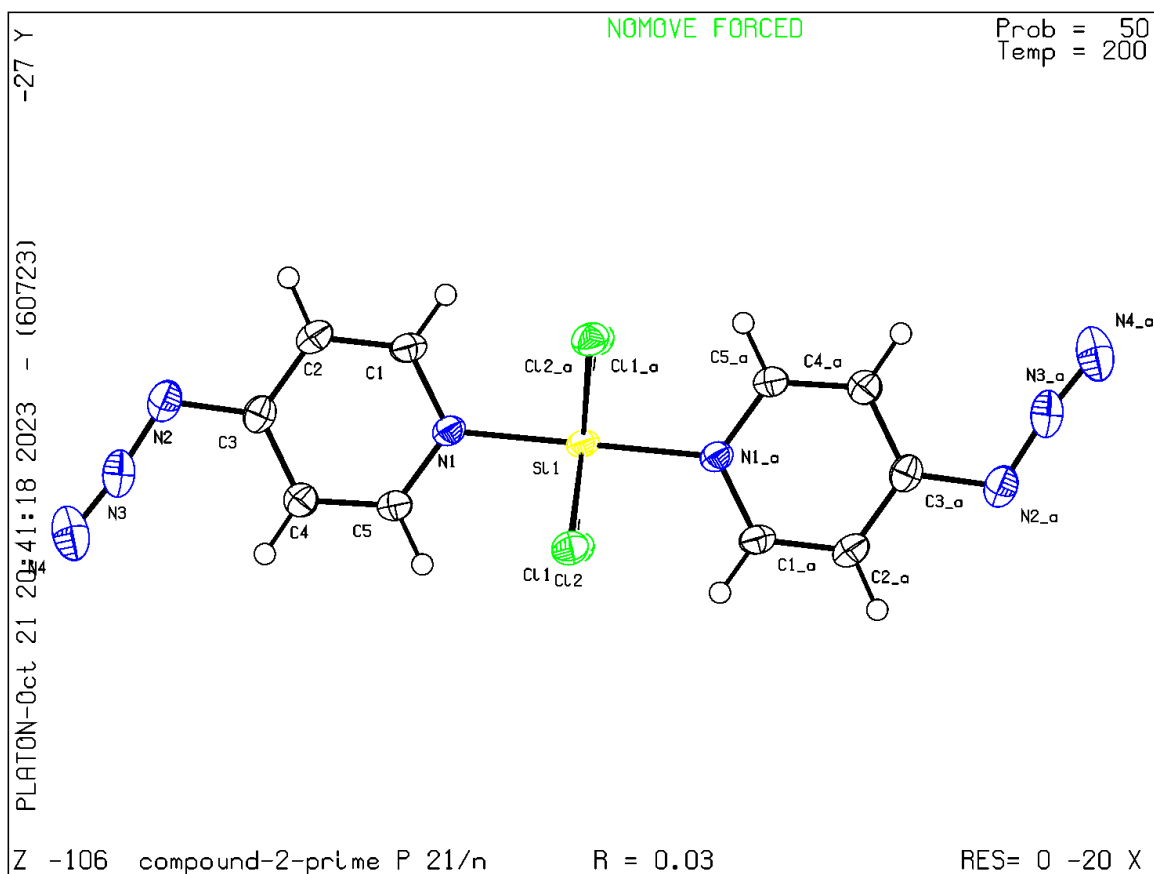

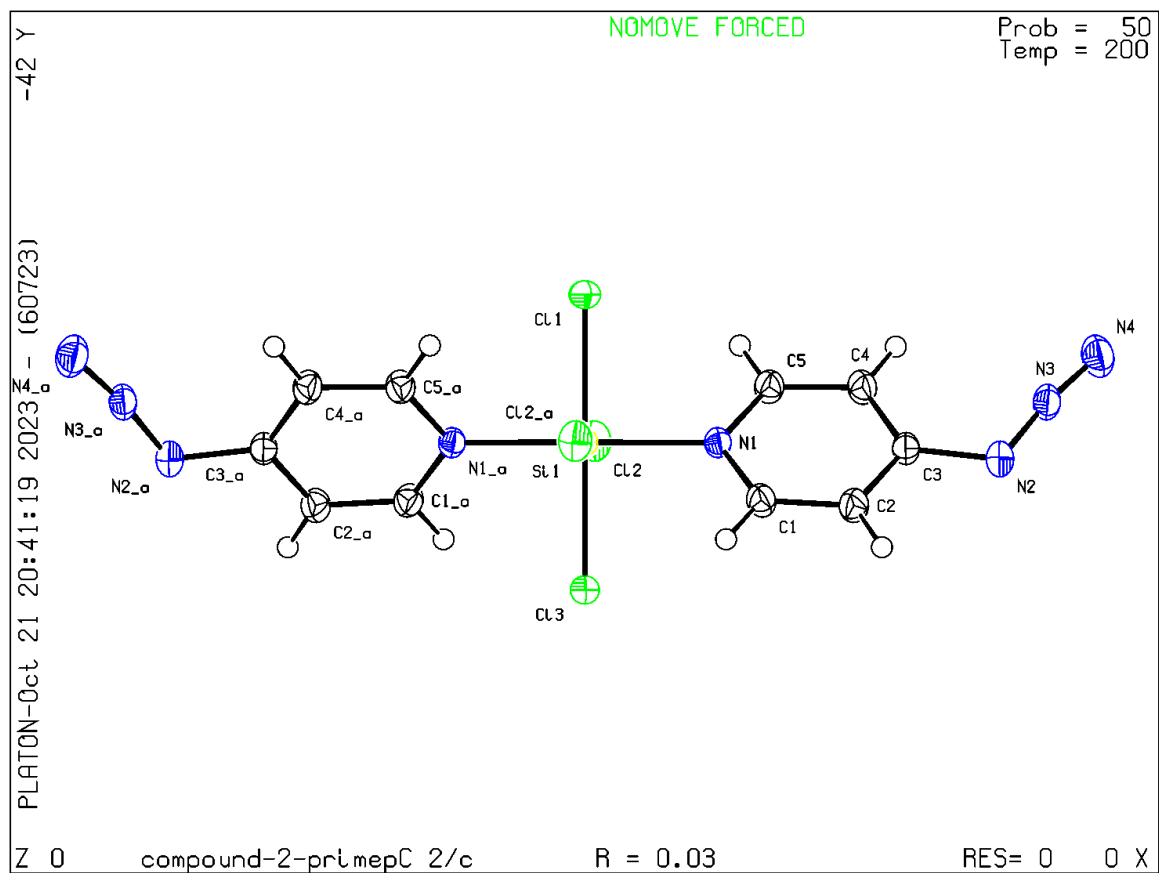

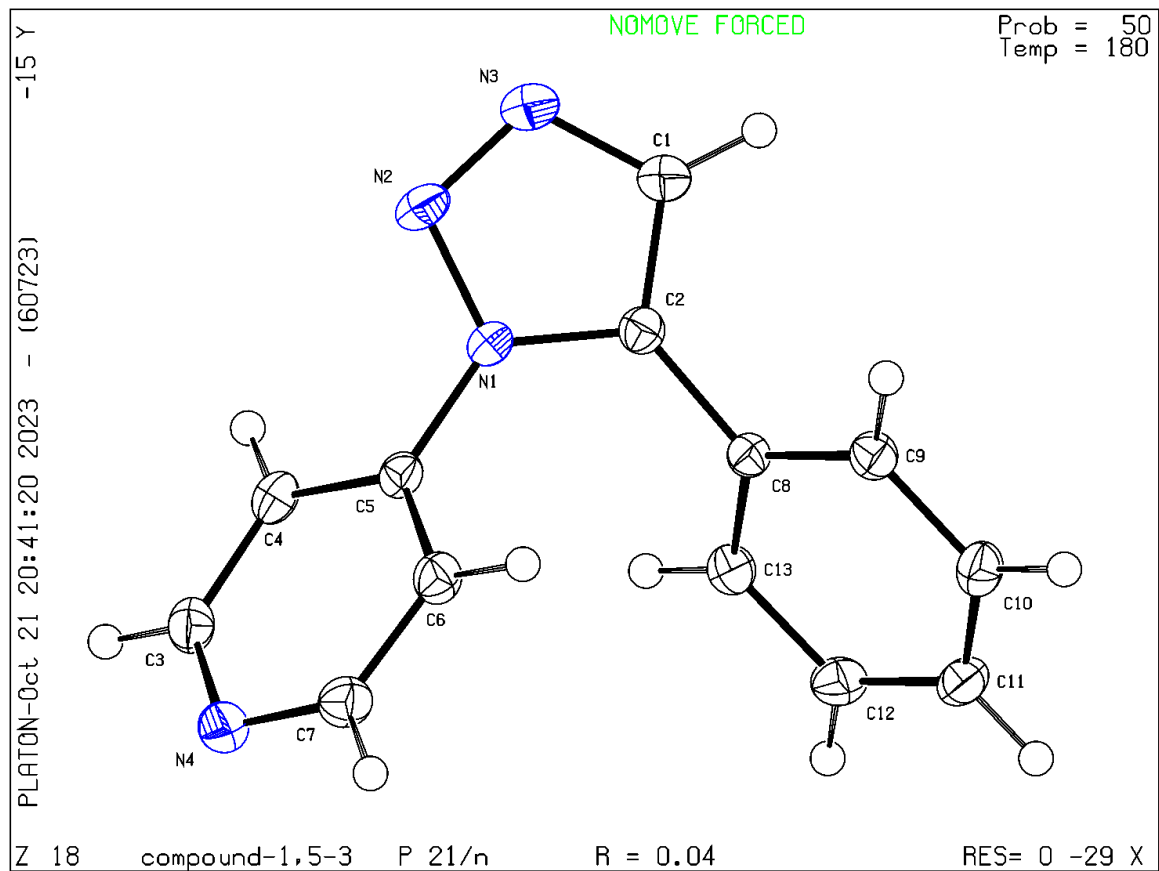

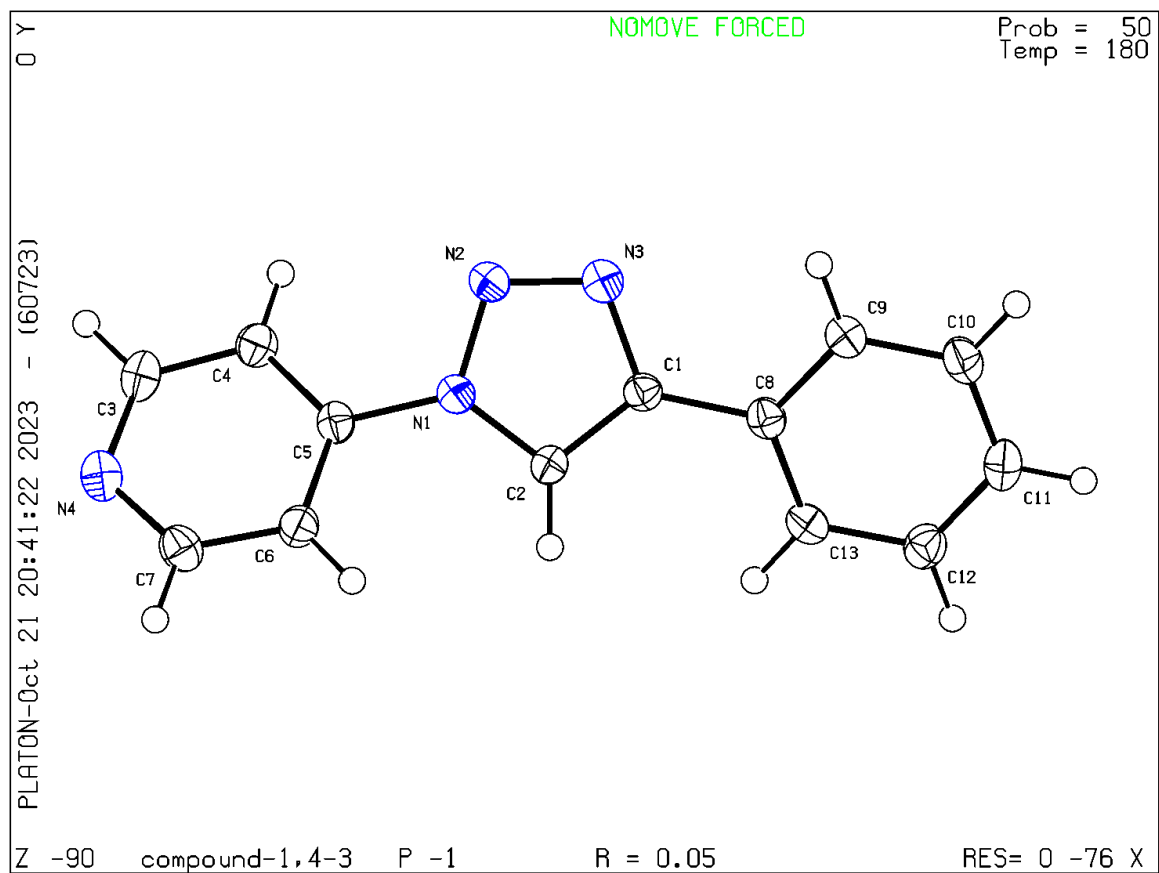

Supplement: s1 [file s1 › checkcif_all-in-one.pdf]
