# Supplementary material
Source: MDPI journal article supplement (https://www.mdpi.com/2304-6740/11/12/473)
Supplement: s1 [file s1]

Archive with 3 entries (3 files):
- all-in-one.cif
- checkcif_all-in-one.pdf
- SRiedel_JWagler_SupportingInformation_Azidopyridine-SiCl4-adducts.pdf
