# Supplementary material
Source: MDPI journal article supplement (https://www.mdpi.com/2304-6740/11/12/473)
Supplement: s1 [file s1 › all-in-one.cif]

 
data_compound-2-prime
 
_audit_creation_method            'SHELXL-2018/3'
_shelx_SHELXL_version_number      '2018/3'
_chemical_name_systematic         ?
_chemical_name_common             ?
_chemical_melting_point           ?
_chemical_formula_moiety          'C10 H8 Cl4 N8 Si' 
_chemical_formula_sum
 'C10 H8 Cl4 N8 Si' 
_chemical_formula_weight          410.13

loop_
 _atom_type_symbol
 _atom_type_description
 _atom_type_scat_dispersion_real
 _atom_type_scat_dispersion_imag
 _atom_type_scat_source
 'C'  'C'   0.0033   0.0016
 'International Tables Vol C Tables 4.2.6.8 and 6.1.1.4'
 'H'  'H'   0.0000   0.0000
 'International Tables Vol C Tables 4.2.6.8 and 6.1.1.4'
 'N'  'N'   0.0061   0.0033
 'International Tables Vol C Tables 4.2.6.8 and 6.1.1.4'
 'Cl'  'Cl'   0.1484   0.1585
 'International Tables Vol C Tables 4.2.6.8 and 6.1.1.4'
 'Si'  'Si'   0.0817   0.0704
 'International Tables Vol C Tables 4.2.6.8 and 6.1.1.4'
 
_space_group_crystal_system       monoclinic
_space_group_IT_number            14
_space_group_name_H-M_alt         'P 21/n'
_space_group_name_Hall            '-P 2yn'
 
_shelx_space_group_comment
;
The symmetry employed for this shelxl refinement is uniquely defined
by the following loop, which should always be used as a source of
symmetry information in preference to the above space-group names.
They are only intended as comments.
;
 
loop_
 _space_group_symop_operation_xyz
 'x, y, z'
 '-x+1/2, y+1/2, -z+1/2'
 '-x, -y, -z'
 'x-1/2, -y-1/2, z-1/2'
 
_cell_length_a                    7.2920(6)
_cell_length_b                    10.7627(6)
_cell_length_c                    10.0442(8)
_cell_angle_alpha                 90
_cell_angle_beta                  94.795(6)
_cell_angle_gamma                 90
_cell_volume                      785.53(10)
_cell_formula_units_Z             2
_cell_measurement_temperature     200(2)
_cell_measurement_reflns_used    13749
_cell_measurement_theta_min      2.78
_cell_measurement_theta_max      28.34
 
_exptl_crystal_description        piece
_exptl_crystal_colour             colorless
_exptl_crystal_density_meas       ?
_exptl_crystal_density_method     ?
_exptl_crystal_density_diffrn     1.734          
_exptl_crystal_F_000              412
_exptl_transmission_factor_min    ?
_exptl_transmission_factor_max    ?
_exptl_crystal_size_max           0.440
_exptl_crystal_size_mid           0.250
_exptl_crystal_size_min           0.200
_exptl_absorpt_coefficient_mu     0.840
_shelx_estimated_absorpt_T_min    0.709
_shelx_estimated_absorpt_T_max    0.850
_exptl_absorpt_correction_type   integration
_exptl_absorpt_correction_T_min  0.7556
_exptl_absorpt_correction_T_max  0.9221
_exptl_absorpt_process_details    XShape
_exptl_absorpt_special_details    ?
_diffrn_ambient_temperature       200(2)
_diffrn_radiation_wavelength      0.71073
_diffrn_radiation_type            MoK\a
_diffrn_source                    ?
_diffrn_measurement_device_type   'Stoe IPDS 2T'
_diffrn_measurement_method        'omega scans'
_diffrn_detector_area_resol_mean  ?
_diffrn_reflns_number             12304
_diffrn_reflns_av_unetI/netI      0.0105
_diffrn_reflns_av_R_equivalents   0.0224
_diffrn_reflns_limit_h_min        -9
_diffrn_reflns_limit_h_max        9
_diffrn_reflns_limit_k_min        -13
_diffrn_reflns_limit_k_max        14
_diffrn_reflns_limit_l_min        -13
_diffrn_reflns_limit_l_max        13
_diffrn_reflns_theta_min          2.779
_diffrn_reflns_theta_max          27.992
_diffrn_reflns_theta_full         25.242
_diffrn_measured_fraction_theta_max   1.000
_diffrn_measured_fraction_theta_full  1.000
_diffrn_reflns_Laue_measured_fraction_max    1.000
_diffrn_reflns_Laue_measured_fraction_full   1.000
_diffrn_reflns_point_group_measured_fraction_max   1.000
_diffrn_reflns_point_group_measured_fraction_full  1.000
_reflns_number_total              1895
_reflns_number_gt                 1671
_reflns_threshold_expression      'I > 2\s(I)'
_reflns_Friedel_coverage          0.000
_reflns_Friedel_fraction_max      .
_reflns_Friedel_fraction_full     .
 
_reflns_special_details
;
 Reflections were merged by SHELXL according to the crystal
 class for the calculation of statistics and refinement.
 
 _reflns_Friedel_fraction is defined as the number of unique
 Friedel pairs measured divided by the number that would be
 possible theoretically, ignoring centric projections and
 systematic absences.
;
 
_computing_data_collection        ?
_computing_cell_refinement        ?
_computing_data_reduction         ?
_computing_structure_solution     ?
_computing_structure_refinement 'SHELXL-2018/3 (Sheldrick, 2018)'
_computing_molecular_graphics     ?
_computing_publication_material   ?
_refine_special_details           ?
_refine_ls_structure_factor_coef  Fsqd
_refine_ls_matrix_type            full
_refine_ls_weighting_scheme       calc
_refine_ls_weighting_details
'w=1/[\s^2^(Fo^2^)+(0.0207P)^2^+0.7118P] where P=(Fo^2^+2Fc^2^)/3'
_atom_sites_solution_primary      ShelXT
_atom_sites_solution_secondary    ?
_atom_sites_solution_hydrogens    geom
_refine_ls_hydrogen_treatment     constr
_refine_ls_extinction_method      'SHELXL-2018/3 (Sheldrick 2018)'
_refine_ls_extinction_coef        0.0102(15)
_refine_ls_extinction_expression
 'Fc^*^=kFc[1+0.001xFc^2^\l^3^/sin(2\q)]^-1/4^'
_refine_ls_number_reflns          1895
_refine_ls_number_parameters      107
_refine_ls_number_restraints      0
_refine_ls_R_factor_all           0.0386
_refine_ls_R_factor_gt            0.0320
_refine_ls_wR_factor_ref          0.0770
_refine_ls_wR_factor_gt           0.0720
_refine_ls_goodness_of_fit_ref    1.277
_refine_ls_restrained_S_all       1.277
_refine_ls_shift/su_max           0.000
_refine_ls_shift/su_mean          0.000
 
loop_
 _atom_site_label
 _atom_site_type_symbol
 _atom_site_fract_x
 _atom_site_fract_y
 _atom_site_fract_z
 _atom_site_U_iso_or_equiv
 _atom_site_adp_type
 _atom_site_occupancy
 _atom_site_site_symmetry_order  
 _atom_site_calc_flag
 _atom_site_refinement_flags_posn
 _atom_site_refinement_flags_adp
 _atom_site_refinement_flags_occupancy
 _atom_site_disorder_assembly
 _atom_site_disorder_group
Cl1 Cl 0.39773(6) -0.02162(5) 0.29044(4) 0.02948(14) Uani 1 1 d . . . . .
Cl2 Cl 0.23399(6) 0.07545(4) 0.54930(5) 0.02942(14) Uani 1 1 d . . . . .
Si1 Si 0.500000 0.000000 0.500000 0.02188(16) Uani 1 2 d S . P . .
C1 C 0.7524(2) 0.21047(18) 0.51043(18) 0.0256(4) Uani 1 1 d . . . . .
H1 H 0.832633 0.154807 0.560188 0.031 Uiso 1 1 calc R U . . .
N1 N 0.5851(2) 0.16884(15) 0.46170(15) 0.0235(3) Uani 1 1 d . . . . .
N2 N 0.7566(2) 0.53481(16) 0.40356(19) 0.0325(4) Uani 1 1 d . . . . .
N3 N 0.6479(3) 0.60241(16) 0.33190(18) 0.0339(4) Uani 1 1 d . . . . .
N4 N 0.5620(3) 0.67185(19) 0.2709(2) 0.0492(5) Uani 1 1 d . . . . .
C2 C 0.8114(3) 0.33046(19) 0.4909(2) 0.0285(4) Uani 1 1 d . . . . .
H2 H 0.929426 0.356795 0.527295 0.034 Uiso 1 1 calc R U . . .
C3 C 0.6956(3) 0.41202(17) 0.41737(18) 0.0255(4) Uani 1 1 d . . . . .
C4 C 0.5244(3) 0.36905(18) 0.36421(19) 0.0276(4) Uani 1 1 d . . . . .
H4 H 0.443547 0.422391 0.311827 0.033 Uiso 1 1 calc R U . . .
C5 C 0.4742(2) 0.24857(18) 0.38851(19) 0.0267(4) Uani 1 1 d . . . . .
H5 H 0.357027 0.220175 0.352498 0.032 Uiso 1 1 calc R U . . .
 
loop_
 _atom_site_aniso_label
 _atom_site_aniso_U_11
 _atom_site_aniso_U_22
 _atom_site_aniso_U_33
 _atom_site_aniso_U_23
 _atom_site_aniso_U_13
 _atom_site_aniso_U_12
Cl1 0.0283(2) 0.0354(3) 0.0239(2) 0.00193(17) -0.00299(17) -0.00612(18)
Cl2 0.0195(2) 0.0314(3) 0.0378(3) 0.00181(18) 0.00477(17) -0.00005(16)
Si1 0.0163(3) 0.0265(3) 0.0225(3) 0.0020(3) -0.0004(2) -0.0023(2)
C1 0.0187(8) 0.0317(9) 0.0259(8) 0.0004(7) -0.0008(6) -0.0018(7)
N1 0.0189(7) 0.0264(7) 0.0251(7) 0.0014(6) 0.0007(5) -0.0030(6)
N2 0.0316(9) 0.0268(8) 0.0400(10) -0.0020(7) 0.0080(7) -0.0050(7)
N3 0.0439(10) 0.0235(8) 0.0360(9) -0.0020(7) 0.0129(8) -0.0045(7)
N4 0.0700(15) 0.0300(10) 0.0481(12) 0.0049(9) 0.0082(10) 0.0011(10)
C2 0.0212(8) 0.0313(10) 0.0329(9) -0.0030(8) 0.0015(7) -0.0052(7)
C3 0.0259(9) 0.0256(9) 0.0260(9) -0.0020(7) 0.0081(7) -0.0033(7)
C4 0.0251(9) 0.0283(9) 0.0294(9) 0.0028(7) 0.0020(7) -0.0010(7)
C5 0.0211(8) 0.0294(9) 0.0288(9) 0.0023(7) -0.0023(7) -0.0019(7)
 
_geom_special_details
;
 All esds (except the esd in the dihedral angle between two l.s. planes)
 are estimated using the full covariance matrix.  The cell esds are taken
 into account individually in the estimation of esds in distances, angles
 and torsion angles; correlations between esds in cell parameters are only
 used when they are defined by crystal symmetry.  An approximate (isotropic)
 treatment of cell esds is used for estimating esds involving l.s. planes.
;
 
loop_
 _geom_bond_atom_site_label_1
 _geom_bond_atom_site_label_2
 _geom_bond_distance
 _geom_bond_site_symmetry_2
 _geom_bond_publ_flag
Cl1 Si1 2.1859(5) . ?
Cl2 Si1 2.1972(5) . ?
Si1 N1 1.9685(15) 3_656 ?
Si1 N1 1.9685(15) . ?
C1 N1 1.352(2) . ?
C1 C2 1.380(3) . ?
C1 H1 0.9500 . ?
N1 C5 1.353(2) . ?
N2 N3 1.257(3) . ?
N2 C3 1.405(2) . ?
N3 N4 1.123(3) . ?
C2 C3 1.387(3) . ?
C2 H2 0.9500 . ?
C3 C4 1.394(3) . ?
C4 C5 1.375(3) . ?
C4 H4 0.9500 . ?
C5 H5 0.9500 . ?
 
loop_
 _geom_angle_atom_site_label_1
 _geom_angle_atom_site_label_2
 _geom_angle_atom_site_label_3
 _geom_angle
 _geom_angle_site_symmetry_1
 _geom_angle_site_symmetry_3
 _geom_angle_publ_flag
N1 Si1 N1 180.0 3_656 . ?
N1 Si1 Cl1 89.88(5) 3_656 3_656 ?
N1 Si1 Cl1 90.13(5) . 3_656 ?
N1 Si1 Cl1 90.12(5) 3_656 . ?
N1 Si1 Cl1 89.87(5) . . ?
Cl1 Si1 Cl1 180.0 3_656 . ?
N1 Si1 Cl2 89.92(5) 3_656 . ?
N1 Si1 Cl2 90.08(5) . . ?
Cl1 Si1 Cl2 88.865(19) 3_656 . ?
Cl1 Si1 Cl2 91.134(19) . . ?
N1 Si1 Cl2 90.08(5) 3_656 3_656 ?
N1 Si1 Cl2 89.92(5) . 3_656 ?
Cl1 Si1 Cl2 91.134(19) 3_656 3_656 ?
Cl1 Si1 Cl2 88.867(19) . 3_656 ?
Cl2 Si1 Cl2 180.0 . 3_656 ?
N1 C1 C2 122.76(17) . . ?
N1 C1 H1 118.6 . . ?
C2 C1 H1 118.6 . . ?
C1 N1 C5 117.81(16) . . ?
C1 N1 Si1 121.65(13) . . ?
C5 N1 Si1 120.52(12) . . ?
N3 N2 C3 114.28(17) . . ?
N4 N3 N2 173.4(2) . . ?
C1 C2 C3 118.98(17) . . ?
C1 C2 H2 120.5 . . ?
C3 C2 H2 120.5 . . ?
C2 C3 C4 118.64(17) . . ?
C2 C3 N2 117.65(17) . . ?
C4 C3 N2 123.69(18) . . ?
C5 C4 C3 119.21(18) . . ?
C5 C4 H4 120.4 . . ?
C3 C4 H4 120.4 . . ?
N1 C5 C4 122.58(17) . . ?
N1 C5 H5 118.7 . . ?
C4 C5 H5 118.7 . . ?
 
loop_
 _geom_torsion_atom_site_label_1
 _geom_torsion_atom_site_label_2
 _geom_torsion_atom_site_label_3
 _geom_torsion_atom_site_label_4
 _geom_torsion
 _geom_torsion_site_symmetry_1
 _geom_torsion_site_symmetry_2
 _geom_torsion_site_symmetry_3
 _geom_torsion_site_symmetry_4
 _geom_torsion_publ_flag
C2 C1 N1 C5 1.5(3) . . . . ?
C2 C1 N1 Si1 -176.49(14) . . . . ?
N1 C1 C2 C3 -0.6(3) . . . . ?
C1 C2 C3 C4 -0.9(3) . . . . ?
C1 C2 C3 N2 177.61(17) . . . . ?
N3 N2 C3 C2 177.62(18) . . . . ?
N3 N2 C3 C4 -4.0(3) . . . . ?
C2 C3 C4 C5 1.4(3) . . . . ?
N2 C3 C4 C5 -177.02(18) . . . . ?
C1 N1 C5 C4 -0.9(3) . . . . ?
Si1 N1 C5 C4 177.04(15) . . . . ?
C3 C4 C5 N1 -0.5(3) . . . . ?
 
_refine_diff_density_max    0.329
_refine_diff_density_min   -0.288
_refine_diff_density_rms    0.067

_shelx_res_file
;
TITL SR-P004_01
    shelx.res
    created by SHELXL-2018/3 at 13:17:20 on 15-Apr-2023
CELL  0.71073    7.2920  10.7627  10.0442   90.000   94.795   90.000
ZERR     2.00    0.0006   0.0006   0.0008    0.000    0.006    0.000
LATT 1
SYMM 1/2-X, 1/2+Y, 1/2-Z
SFAC C  H  N  Cl Si
UNIT 20  16  16  8  2
OMIT 0 56
L.S. 10
ACTA
BOND $H
FMAP 2
PLAN 20
CONF
SIZE 0.44 0.25 0.20
TEMP -73
WGHT    0.020700    0.711800
EXTI    0.010189
FVAR       0.78203
CL1   4    0.397732   -0.021620    0.290444    11.00000    0.02833    0.03537 =
         0.02389    0.00193   -0.00299   -0.00612
CL2   4    0.233994    0.075453    0.549296    11.00000    0.01949    0.03137 =
         0.03778    0.00181    0.00477   -0.00005
SI1   5    0.500000    0.000000    0.500000    10.50000    0.01629    0.02652 =
         0.02250    0.00200   -0.00042   -0.00226
C1    1    0.752351    0.210473    0.510432    11.00000    0.01872    0.03171 =
         0.02589    0.00038   -0.00081   -0.00185
AFIX  43
H1    2    0.832633    0.154807    0.560188    11.00000   -1.20000
AFIX   0
N1    3    0.585079    0.168841    0.461698    11.00000    0.01888    0.02635 =
         0.02514    0.00141    0.00068   -0.00302
N2    3    0.756559    0.534812    0.403561    11.00000    0.03162    0.02681 =
         0.03999   -0.00199    0.00800   -0.00499
N3    3    0.647867    0.602409    0.331897    11.00000    0.04386    0.02351 =
         0.03602   -0.00197    0.01288   -0.00454
N4    3    0.561996    0.671847    0.270936    11.00000    0.07001    0.02998 =
         0.04809    0.00487    0.00820    0.00111
C2    1    0.811354    0.330463    0.490920    11.00000    0.02117    0.03134 =
         0.03294   -0.00301    0.00150   -0.00522
AFIX  43
H2    2    0.929426    0.356795    0.527295    11.00000   -1.20000
AFIX   0
C3    1    0.695561    0.412020    0.417366    11.00000    0.02589    0.02555 =
         0.02603   -0.00199    0.00806   -0.00330
C4    1    0.524442    0.369048    0.364209    11.00000    0.02514    0.02827 =
         0.02943    0.00277    0.00202   -0.00098
AFIX  43
H4    2    0.443547    0.422391    0.311827    11.00000   -1.20000
AFIX   0
C5    1    0.474194    0.248569    0.388506    11.00000    0.02111    0.02938 =
         0.02884    0.00231   -0.00231   -0.00189
AFIX  43
H5    2    0.357027    0.220175    0.352498    11.00000   -1.20000
AFIX   0
HKLF 4


REM  SR-P004_01
REM wR2 = 0.0770, GooF = S = 1.277, Restrained GooF = 1.277 for all data
REM R1 = 0.0320 for 1671 Fo > 4sig(Fo) and 0.0386 for all 1895 data
REM 107 parameters refined using 0 restraints

END

WGHT      0.0207      0.7118

REM Highest difference peak  0.329,  deepest hole -0.288,  1-sigma level  0.067
Q1    1   0.7814  0.2722  0.4879  11.00000  0.05    0.33
Q2    1   0.4969  0.3190  0.3989  11.00000  0.05    0.33
Q3    1   0.3359  0.0165  0.4847  11.00000  0.05    0.28
Q4    1   0.5320  0.0987  0.4465  11.00000  0.05    0.27
Q5    1   0.7228  0.4763  0.3970  11.00000  0.05    0.27
Q6    1   0.5391  0.2042  0.4223  11.00000  0.05    0.26
Q7    1   0.6098  0.3882  0.3953  11.00000  0.05    0.25
Q8    1   0.4509  0.0003  0.4154  11.00000  0.05    0.23
Q9    1   0.2414 -0.0369  0.5572  11.00000  0.05    0.23
Q10   1   0.2465 -0.0346  0.3488  11.00000  0.05    0.23
Q11   1   0.3646 -0.0349  0.4087  11.00000  0.05    0.23
Q12   1   0.3903  0.1835  0.2938  11.00000  0.05    0.23
Q13   1   0.5114 -0.0811  0.2191  11.00000  0.05    0.22
Q14   1   0.3610  0.0208  0.5616  11.00000  0.05    0.22
Q15   1   0.6581 -0.0752  0.2496  11.00000  0.05    0.22
Q16   1   0.3055  0.0594  0.6607  11.00000  0.05    0.21
Q17   1   0.5144  0.1389  0.5110  11.00000  0.05    0.21
Q18   1   0.1421  0.0589  0.3440  11.00000  0.05    0.21
Q19   1   0.6829  0.6631  0.2844  11.00000  0.05    0.20
Q20   1   0.4110  0.1565  0.2013  11.00000  0.05    0.20
;
_shelx_res_checksum   48220

_shelx_hkl_file
;
  -8   5  -5   31.33    2.43   0
  -7  -1  -3   64.25    2.01   0
  -7   2  -3   -0.01    1.04   0
  -7   3  -3  406.25    3.63   0
  -7   6  -4    3.54    1.81   0
  -6  -1  -2   35.80    1.59   0
  -6   2  -2  349.98    3.37   0
  -6   3  -2    2.97    1.22   0
  -6   6  -3   22.68    1.29   0
  -6   8  -4   12.07    1.81   0
  -6   9  -5   28.72    1.73   0
  -5  -9  -5   24.31    1.94   0
  -5   9  -4   22.18    1.38   0
  -4   4  -1   85.85    1.67   0
  -4   7  -2  149.42    1.98   0
  -4   9  -3   10.26    1.38   0
  -4  10  -4   87.82    1.77   0
  -4  11  -5    0.49    1.54   0
  -3   8  -2  348.66    2.93   0
  -2  -7  -2   56.73    1.80   0
  -2   0   0  484.45    7.22   0
  -2   1   0   51.17    2.33   0
  -2   6  -1   33.50    1.19   0
  -2  10  -3   -0.18    1.39   0
  -2  11  -4  122.65    1.91   0
  -2  12  -5  209.39    2.46   0
  -1 -11  -5   93.60    1.85   0
  -1 -10  -4   -0.76    1.01   0
  -1  -5  -1  730.71    5.31   0
  -1   2   0  187.00    3.42   0
  -1  10  -3   37.76    1.24   0
   0 -11  -5    0.60    1.21   0
   0 -10  -4   84.38    1.66   0
   0  -7  -2  284.84    2.86   0
   0  -5  -1  382.44    3.60   0
   0  10  -3  592.29    3.69   0
   1   8  -2   42.21    1.30   0
   1  11  -4    5.34    1.17   0
   1  12  -5   58.59    1.72   0
   2  -8  -3  271.57    2.46   0
   2  -6  -2  605.52    3.84   0
   3  -7  -3  192.45    2.18   0
   3  -5  -2   12.33    0.95   0
   3   0  -1 4365.09   17.31   0
   3   1  -1  353.56    6.67   0
   3  11  -5   15.71    1.85   0
   3  12  -6   13.66    2.29   0
   4 -10  -6   29.74    1.54   0
   4  -3  -2  727.82    4.56   0
   4   7  -3   53.68    1.98   0
   4  10  -5  416.26    4.04   0
   5  -6  -4  119.17    1.81   0
   5  10  -6    2.09    2.09   0
   6  -7  -6    2.36    1.53   0
   6  -3  -4   56.50    1.74   0
   6   7  -5   41.81    2.76   0
   7  -5  -6   -0.02    1.24   0
   7  -2  -5  108.37    2.18   0
   8  -3  -7   27.01    1.71   0
  -8   0  -4   -0.28    1.81   0
  -8   1  -4   19.72    1.55   0
  -8   2  -4   50.26    2.21   0
  -8   3  -4    0.23    1.73   0
  -7  -6  -5   66.85    4.15   0
  -7  -2  -3    0.12    1.67   0
  -7   4  -3    2.45    1.49   0
  -6   4  -2  328.06    3.15   0
  -6   7  -3  407.17    3.23   0
  -5   0  -1    2.14    1.06   0
  -5   1  -1  172.90    2.84   0
  -5   2  -1   79.96    1.97   0
  -5   6  -2   79.75    1.55   0
  -5   8  -3   22.13    1.24   0
  -4   5  -1  503.16    3.62   0
  -3 -11  -6    0.07    1.53   0
  -3  -4  -1  321.02    5.37   0
  -3   6  -1  170.84    2.10   0
  -3  10  -3  187.82    2.10   0
  -3  11  -4    0.74    1.29   0
  -3  12  -5    2.79    1.64   0
  -2   2   0  453.11    4.57   0
  -2   9  -2  342.76    2.85   0
  -1 -12  -7   39.60    2.45   0
  -1  -7  -2    4.79    0.85   0
  -1   3   0 2617.63   10.40   0
  -1   7  -1  836.85    4.61   0
  -1   9  -2  121.99    1.78   0
   0 -12  -7    1.55    2.27   0
   0   2   0 3443.37   15.92   0
   0   9  -2    7.96    1.29   0
   1 -12  -7   29.98    1.83   0
   1  -8  -3   60.13    1.61   0
   1  -4  -1 1976.95    8.10   0
   1   6  -1  951.45    5.64   0
   1  10  -3    8.86    1.05   0
   2 -10  -5   67.84    1.50   0
   2  -9  -4    1.86    0.99   0
   2  -3  -1 1282.26    6.67   0
   2   5  -1 1562.06    8.82   0
   2  11  -4    0.22    1.42   0
   2  12  -5   11.89    1.96   0
   3 -11  -7    0.28    1.54   0
   3  -8  -4   63.85    1.60   0
   3  10  -4   -0.00    1.11   0
   4  -7  -4    4.61    0.93   0
   4  -5  -3  261.11    2.74   0
   4  -2  -2 1903.30    8.15   0
   4   9  -4   26.10    1.69   0
   5  -9  -7   37.18    2.14   0
   5  -8  -6    1.70    1.64   0
   5  -7  -5    1.58    1.04   0
   5  -3  -3  212.06    2.47   0
   5   9  -5   15.25    1.88   0
   6  -8  -7   -0.42    1.50   0
   6  -5  -5  253.44    2.56   0
   7  -6  -7    1.14    1.53   0
   7  -4  -6   13.96    1.61   0
   7  -1  -5   83.69    2.10   0
   7   3  -5  251.03    4.78   0
   8  -2  -7    1.50    1.85   0
   8   4  -7    0.00    2.23   0
  -8  -1  -4   19.82    2.05   0
  -8   4  -4    2.03    2.01   0
  -7   5  -3  189.03    2.61   0
  -7   7  -4   19.80    1.55   0
  -6  -2  -2  334.78    5.48   0
  -6   5  -2    4.45    1.35   0
  -6   9  -4   75.87    1.86   0
  -5  -6  -3   22.62    1.96   0
  -5   3  -1  919.34    5.18   0
  -5   7  -2  132.76    2.13   0
  -5   9  -3  233.16    2.67   0
  -5  10  -4   95.99    1.91   0
  -4  -7  -3    4.16    1.20   0
  -4   8  -2    0.48    0.96   0
  -4  10  -3    5.87    1.48   0
  -4  11  -4    0.40    1.37   0
  -3 -10  -5    4.39    1.25   0
  -3  -9  -4  155.02    2.32   0
  -3   9  -2   35.36    1.62   0
  -2 -11  -6   33.16    1.63   0
  -2  -8  -3  121.80    2.26   0
  -2   3   0  455.89    4.11   0
  -2   7  -1  452.86    3.24   0
  -2  11  -3   23.84    1.53   0
  -2  12  -4   11.56    1.45   0
  -1 -11  -6   77.00    2.16   0
  -1  11  -3    1.00    1.48   0
  -1  12  -4    1.57    1.25   0
  -1  13  -5    0.93    1.63   0
   0 -11  -6    3.46    1.71   0
   0  -8  -3  722.85    4.26   0
   0   3   0   -1.23    1.76   0
   0   7  -1  131.74    2.03   0
   0  12  -4   91.95    1.82   0
   0  13  -5    0.06    1.61   0
   1 -11  -6   15.95    1.34   0
   1 -10  -5  177.36    2.10   0
   1  -9  -4  167.64    2.05   0
   1  -6  -2   23.62    1.30   0
   2 -11  -7   83.29    2.33   0
   2  -7  -3  165.74    2.21   0
   2   8  -2  680.23    4.61   0
   3  -9  -5  145.48    1.94   0
   3  -6  -3  251.25    2.58   0
   3  -4  -2   73.89    1.60   0
   3   9  -3   99.18    2.12   0
   4 -10  -7    3.41    1.53   0
   4  -9  -6   89.72    1.75   0
   4  -8  -5  263.15    2.42   0
   5  -5  -4   88.39    1.59   0
   5  -2  -3   69.83    1.88   0
   5   5  -3    5.14    2.19   0
   6  -8  -8    0.58    2.29   0
   6  -7  -7    0.42    1.87   0
   6  -6  -6    7.59    1.18   0
   6  -2  -4  302.87    3.07   0
   7  -5  -7   22.95    1.83   0
   7   0  -5  168.92    2.69   0
   7   1  -5   87.04    2.42   0
   7   2  -5  107.08    2.84   0
   8  -1  -7   60.41    2.23   0
  -8   5  -4    7.94    1.60   0
  -7   6  -3    5.57    1.70   0
  -7   8  -4   10.21    1.67   0
  -6   6  -2  920.38    4.75   0
  -6   8  -3  243.42    2.49   0
  -5  -4  -2  524.66   11.49   0
  -5  -1  -1  177.91    3.69   0
  -5   4  -1   86.69    1.71   0
  -5  11  -4   41.80    2.21   0
  -4   6  -1  204.45    2.26   0
  -3  -6  -2  505.36    4.73   0
  -3   1   0  191.90    3.28   0
  -3   2   0 2309.69    9.46   0
  -3   3   0  236.13    3.00   0
  -3   7  -1  222.60    2.27   0
  -3  11  -3  171.08    2.41   0
  -3  12  -4    1.95    1.42   0
  -2 -10  -5  336.59    3.09   0
  -2  -9  -4  101.13    1.91   0
  -2   4   0  410.33    3.59   0
  -1 -10  -5   54.94    1.55   0
  -1  -9  -4   57.32    1.73   0
  -1  -8  -3  122.56    1.95   0
  -1   4   0  547.07    4.36   0
  -1   8  -1   22.63    1.40   0
  -1  10  -2  423.74    3.32   0
   0 -10  -5   29.37    1.29   0
   0  -9  -4  222.60    2.37   0
   0  11  -3   58.61    1.49   0
   1   7  -1  154.14    2.40   0
   1   9  -2   42.38    1.28   0
   1  11  -3    9.47    1.38   0
   1  12  -4   22.99    1.43   0
   1  13  -5    5.54    1.64   0
   2 -10  -6   57.59    1.83   0
   2  -9  -5   14.57    1.39   0
   2  -8  -4    0.51    1.10   0
   2  -5  -2    0.24    0.74   0
   2  -2  -1  864.16    6.23   0
   2  10  -3  591.34    4.09   0
   3 -10  -7   22.86    1.94   0
   3   7  -2    9.30    1.29   0
   3  12  -5   54.83    2.20   0
   4 -10  -8   19.74    1.69   0
   4  -6  -4   39.71    1.27   0
   4  -4  -3  409.96    3.39   0
   4  -1  -2  149.65    2.57   0
   4  11  -5   -0.11    1.70   0
   5  -9  -8   35.52    1.86   0
   5  -6  -5  114.17    1.79   0
   6  -4  -5  121.54    1.93   0
   6  -1  -4    0.80    0.82   0
   6   9  -6   -0.10    2.10   0
   7  -6  -8    8.94    1.65   0
   7  -3  -6    2.46    1.17   0
   8   0  -7    0.04    1.43   0
   8   1  -7   59.65    2.46   0
   8   2  -7    2.93    2.09   0
   8   3  -7   25.94    2.27   0
  -8  -2  -4   47.76    2.52   0
  -8   6  -4   82.75    2.11   0
  -7   7  -3   50.61    1.98   0
  -6  -6  -4   28.70    2.39   0
  -6   9  -3   76.79    2.08   0
  -6  10  -4    5.27    1.70   0
  -5  -9  -6   -0.09    2.07   0
  -5   5  -1  965.27    4.81   0
  -5   8  -2   -2.16    1.08   0
  -5  10  -3   52.86    1.65   0
  -4  -8  -4   30.52    1.41   0
  -4   7  -1  725.16    3.99   0
  -4   9  -2  220.39    2.27   0
  -4  11  -3   80.62    2.16   0
  -4  12  -4   17.02    1.70   0
  -3   4   0  585.77    4.03   0
  -3   8  -1    3.53    1.24   0
  -3  10  -2  594.93    3.77   0
  -2 -11  -7   72.15    2.44   0
  -2   5   0  417.48    3.49   0
  -2   8  -1  257.69    2.48   0
  -2  10  -2   55.94    1.41   0
  -2  13  -4    0.40    2.18   0
  -1   5   0 2270.30    8.13   0
  -1  13  -4   53.39    2.25   0
   0 -11  -7    1.54    1.89   0
   0  -6  -2  239.40    2.69   0
   0  -4  -1 1119.71    6.51   0
   0   4   0  119.75    2.41   0
   0   8  -1   55.40    1.43   0
   0  10  -2   11.10    1.04   0
   1 -11  -7  107.76    1.98   0
   1 -10  -6  225.65    2.61   0
   1  -7  -3   82.11    1.54   0
   2 -11  -8    0.07    1.70   0
   2   6  -1   11.43    1.37   0
   2  12  -4    3.18    1.63   0
   2  13  -5   12.83    2.35   0
   3  -9  -6   50.65    1.43   0
   3  -8  -5   65.95    1.47   0
   3  -7  -4  233.86    2.31   0
   3  -3  -2  931.59    5.38   0
   3  11  -4    0.35    1.22   0
   4  -9  -7  186.53    2.23   0
   4  -8  -6  225.79    2.56   0
   4  -7  -5    6.20    1.00   0
   4   8  -3    9.05    1.43   0
   5  -8  -7  170.85    2.19   0
   5  -7  -6   59.45    1.48   0
   5  -4  -4  276.44    2.67   0
   5  -1  -3    6.01    0.86   0
   5   8  -4  147.81    3.30   0
   6  -7  -8   11.35    2.11   0
   6  -6  -7   76.66    2.08   0
   6  -5  -6  140.91    2.05   0
   6  -3  -5    0.31    1.32   0
   6   0  -4   16.06    1.48   0
   6   4  -4  193.40    5.69   0
   7  -5  -8  143.07    2.68   0
   7  -4  -7   21.97    1.47   0
   7  -2  -6  121.74    2.12   0
   8  -2  -8    1.51    1.66   0
  -8   2  -3   -0.20    1.70   0
  -8   3  -3    9.31    1.83   0
  -7   1  -2  218.15    3.14   0
  -7   2  -2   36.64    1.47   0
  -7   3  -2  631.11    4.43   0
  -7   4  -2  337.22    3.28   0
  -6  -8  -6   79.70    2.75   0
  -6  -7  -5  133.27    3.49   0
  -6   7  -2    0.72    1.10   0
  -5  -8  -5   29.92    2.00   0
  -5  -7  -4   12.83    1.65   0
  -5   6  -1   32.30    1.15   0
  -5   9  -2  111.60    2.07   0
  -4  -5  -2  278.06    4.62   0
  -4  10  -2   73.51    1.89   0
  -3 -10  -6   12.40    1.40   0
  -3   0   0    0.81    0.91   0
  -3   5   0  261.12    2.67   0
  -3  12  -3    0.71    1.89   0
  -2  -4  -1    3.86    0.86   0
  -2   6   0 1605.08    6.41   0
  -2   9  -1    3.86    1.19   0
  -2  12  -3   38.41    1.51   0
  -1 -11  -7    8.39    1.51   0
  -1  -6  -2    3.27    0.89   0
  -1  -4  -1  269.21    3.61   0
  -1   9  -1  162.57    2.15   0
  -1  12  -3  135.54    1.99   0
   0 -10  -6   88.99    1.99   0
   0   5   0    1.30    1.21   0
   0  12  -3  111.03    1.90   0
   0  13  -4  198.88    2.43   0
   1 -11  -8    0.74    1.96   0
   1  -9  -5    6.50    1.02   0
   1  -8  -4  181.48    2.19   0
   1  -5  -2  298.37    3.05   0
   1  -3  -1 3289.79   11.37   0
   1  10  -2    0.33    0.90   0
   1  13  -4   13.82    1.92   0
   2 -10  -7  221.32    2.43   0
   2  -6  -3   -1.28    0.81   0
   2   9  -2  240.94    2.73   0
   2  11  -3    8.03    1.43   0
   3 -10  -8   -0.62    1.56   0
   3  -5  -3  186.76    2.33   0
   4   0  -2 4114.14   14.53   0
   4   5  -2  941.57   10.45   0
   4  10  -4  105.55    2.28   0
   5  -8  -8  273.98    2.90   0
   5  -5  -5  473.76    3.33   0
   5   0  -3  152.68    2.79   0
   5  10  -5    1.49    1.75   0
   6   1  -4    0.31    1.22   0
   7  -3  -7   43.42    2.03   0
   7  -1  -6    1.45    1.53   0
   8  -1  -8    0.21    1.63   0
  -8   1  -3   47.69    1.79   0
  -8   4  -3    0.52    1.39   0
  -8   5  -3   75.09    2.38   0
  -7   0  -2    0.10    1.35   0
  -7   5  -2  104.80    1.90   0
  -7   8  -3    0.30    1.51   0
  -6   1  -1   35.23    1.60   0
  -6   2  -1    1.72    0.91   0
  -6   3  -1  860.47    5.06   0
  -6   4  -1   98.96    1.77   0
  -6   8  -2  306.84    2.74   0
  -6  10  -3  115.08    2.06   0
  -5   7  -1   57.20    1.41   0
  -5  11  -3  112.19    2.07   0
  -4 -10  -7   60.40    2.14   0
  -4   2   0    6.32    0.87   0
  -4   3   0    5.99    0.91   0
  -4   4   0    0.91    0.75   0
  -4   8  -1  157.78    1.92   0
  -4  12  -3    0.45    1.52   0
  -3  -9  -5   30.61    1.40   0
  -3   6   0  101.96    1.85   0
  -3   9  -1  139.34    1.84   0
  -3  11  -2    8.17    1.22   0
  -2 -10  -6    0.22    1.21   0
  -2  -9  -5   25.81    1.70   0
  -2  -7  -3 1840.95    7.71   0
  -2  11  -2   29.19    1.28   0
  -1 -11  -8   33.97    2.43   0
  -1 -10  -6   67.77    1.65   0
  -1  -7  -3  110.30    2.07   0
  -1   6   0  242.63    2.58   0
  -1  11  -2  120.27    1.83   0
   0 -11  -8   57.70    1.87   0
   0  -9  -5  188.27    2.24   0
   0  -8  -4   56.35    1.71   0
   0  -7  -3  151.77    2.03   0
   0   9  -1    5.28    0.93   0
   0  11  -2   47.62    1.42   0
   1 -10  -7    2.88    1.70   0
   1   8  -1  684.03    4.39   0
   1  12  -3    0.29    1.19   0
   2  -9  -6  227.82    2.38   0
   2  -8  -5    5.54    1.28   0
   2  -7  -4  120.32    1.78   0
   2  -4  -2 1865.45    7.30   0
   3  -9  -7   38.56    1.47   0
   3  -6  -4   -0.21    1.13   0
   3   8  -2  146.72    2.62   0
   3  10  -3   76.98    1.86   0
   4  -9  -8   18.50    1.58   0
   4  -8  -7    3.56    1.49   0
   4  -6  -5    2.34    1.18   0
   4  -5  -4  159.15    2.00   0
   4  -3  -3  497.50    3.83   0
   5  -7  -7    0.59    1.20   0
   5  -6  -6  149.46    2.01   0
   5  -3  -4    0.09    0.87   0
   6  -6  -8    1.29    1.88   0
   6  -5  -7    0.10    1.62   0
   6  -4  -6  134.80    2.05   0
   6  -2  -5   89.52    2.03   0
   6   2  -4  316.15    4.55   0
   6   3  -4   55.11    2.46   0
   7  -4  -8   17.78    1.58   0
   8   0  -8   -0.44    2.01   0
  -8   0  -3    0.22    1.69   0
  -8   6  -3   -0.31    1.57   0
  -7   6  -2   12.84    1.30   0
  -7   7  -2    4.93    1.64   0
  -7   9  -3    7.58    1.75   0
  -6   5  -1  478.31    3.45   0
  -6   6  -1   19.10    1.51   0
  -6   9  -2   10.45    1.80   0
  -5  -9  -7    0.00    2.24   0
  -5   8  -1  136.00    1.84   0
  -5  10  -2   47.53    1.57   0
  -4   1   0    8.95    1.01   0
  -4   5   0  139.29    1.99   0
  -4   6   0  464.25    3.41   0
  -4   9  -1   46.93    1.39   0
  -4  11  -2  184.54    2.19   0
  -3 -10  -7    1.66    1.80   0
  -3   7   0  115.53    1.95   0
  -3  13  -3    0.87    2.24   0
  -2  -8  -4   94.59    1.81   0
  -2   7   0  297.29    2.76   0
  -2  10  -1   98.43    1.67   0
  -2  13  -3    0.81    1.48   0
  -1  -9  -5  409.11    3.17   0
  -1  -8  -4  187.82    2.35   0
  -1   7   0  410.51    3.23   0
  -1  10  -1   44.37    1.71   0
  -1  13  -3   47.73    1.74   0
   0 -10  -7    1.94    1.66   0
   0   6   0  127.35    2.07   0
   0  13  -3   39.99    1.95   0
   1  -9  -6  101.69    1.97   0
   1  -6  -3  456.13    3.49   0
   1   3   0 2647.49   13.64   0
   1   4   0  541.08    5.38   0
   1  11  -2   46.09    1.63   0
   2 -10  -8    0.41    1.46   0
   2  -1  -1 3492.98   14.16   0
   2   7  -1 1445.66    7.16   0
   2  10  -2    2.33    1.35   0
   2  13  -4    8.25    2.15   0
   3  -8  -6  155.51    1.99   0
   3  -7  -5  130.84    1.82   0
   3  -2  -2   11.80    1.32   0
   3  12  -4    9.43    1.95   0
   4  -9  -9   18.22    1.73   0
   4  -7  -6  132.20    1.86   0
   4   1  -2  150.30    3.44   0
   4  12  -5   58.95    2.10   0
   5  -8  -9    1.12    1.69   0
   5  -4  -5   30.25    1.46   0
   5   1  -3    5.61    1.20   0
   6   8  -5   61.63    3.26   0
   7  -2  -7   45.26    1.91   0
   7   0  -6   -0.02    1.07   0
   8   1  -8    0.16    2.02   0
  -7  -3  -3  367.19   10.33   0
  -7   8  -2    0.97    1.77   0
  -6   0  -1   -0.07    1.18   0
  -6   7  -1  562.18    3.74   0
  -5   3   0   27.27    1.43   0
  -5   4   0  624.12    4.23   0
  -5   9  -1   24.86    1.56   0
  -5  11  -2   68.43    2.31   0
  -4  -6  -3   24.94    1.61   0
  -4   7   0  194.06    2.36   0
  -4  10  -1   66.39    1.80   0
  -3  10  -1    0.71    1.05   0
  -3  12  -2  184.69    2.24   0
  -2 -10  -7   10.64    1.45   0
  -2  -1   0   51.08    4.71   0
  -2   8   0 1061.77    4.97   0
  -2  12  -2    0.25    1.23   0
  -1 -10  -7    4.04    1.31   0
  -1   8   0  532.21    3.70   0
  -1  12  -2    0.44    1.20   0
   0  -5  -2  624.58    4.50   0
   0  -3  -1  433.93    4.75   0
   0   7   0   -0.66    0.82   0
   0  10  -1  124.28    1.86   0
   0  12  -2  174.67    2.43   0
   1 -10  -8    6.99    1.49   0
   1  -8  -5  541.91    3.47   0
   1  -7  -4  607.08    3.88   0
   1   5   0 2377.62    9.77   0
   1   9  -1    1.64    0.91   0
   2 -10  -9    4.08    1.64   0
   2  -9  -7   11.25    1.25   0
   2  -5  -3  121.77    1.99   0
   2  12  -3  149.47    2.22   0
   3  -9  -8   15.86    1.44   0
   3  -4  -3   18.10    1.02   0
   3  11  -3  329.91    3.49   0
   4  -8  -8  234.74    2.44   0
   4  -4  -4   12.10    0.99   0
   4  -2  -3  604.37    4.49   0
   4   9  -3  127.30    2.49   0
   4  11  -4    0.91    1.81   0
   5  -7  -8   55.50    1.63   0
   5  -6  -7  380.08    3.00   0
   5  -5  -6  136.57    1.96   0
   5  -2  -4   17.22    1.11   0
   5   9  -4  170.29    3.41   0
   6  -6  -9    6.66    1.59   0
   6  -5  -8   17.67    1.86   0
   6  -4  -7  232.85    2.76   0
   6  -3  -6   91.28    1.76   0
   6  -1  -5    0.47    1.17   0
   7  -4  -9   74.91    2.10   0
   7  -3  -8  125.82    2.16   0
   7   1  -6    0.47    1.13   0
   8   2  -8    2.00    1.64   0
  -9   0  -4    0.28    2.13   0
  -8  -1  -3   48.95    2.63   0
  -8   3  -2   30.07    1.80   0
  -8   4  -2    1.21    1.77   0
  -8   5  -2   46.16    1.99   0
  -7  -1  -2  208.17    3.94   0
  -7   9  -2   59.48    2.23   0
  -6   8  -1   11.42    1.22   0
  -6  10  -2   24.93    1.65   0
  -5  -8  -6   79.19    2.47   0
  -5   2   0  131.95    2.26   0
  -5   5   0   66.56    1.54   0
  -5   6   0  113.11    1.98   0
  -4  -7  -4  205.75    3.10   0
  -4   0   0 1066.41    8.11   0
  -4   8   0   48.89    1.49   0
  -4  12  -2   16.97    1.59   0
  -3 -10  -8    0.00    2.12   0
  -3  -9  -6   70.19    1.82   0
  -3  -5  -2  291.18    4.01   0
  -3   8   0   35.88    1.24   0
  -3  11  -1  183.19    2.35   0
  -2  -9  -6  483.62    3.83   0
  -2  11  -1    1.11    1.00   0
  -2  13  -2   -0.41    1.81   0
  -1  -9  -6   62.50    1.88   0
  -1  -5  -2   10.97    1.24   0
  -1  11  -1  343.20    2.74   0
   0 -10  -8    0.61    1.40   0
   0  -9  -6   14.98    1.11   0
   0  -8  -5  292.75    2.84   0
   0  -6  -3  299.02    2.99   0
   1 -10  -9    5.60    2.16   0
   1  -4  -2 2364.45    8.64   0
   1  -2  -1  150.66    3.04   0
   1   2   0  181.42    4.87   0
   1   6   0  249.86    3.10   0
   1  13  -3   74.70    1.86   0
   2  -8  -6  126.90    1.81   0
   2  -7  -5  228.42    2.56   0
   2  -6  -4    7.42    1.18   0
   2  -3  -2  395.80    3.78   0
   2   8  -1    5.25    1.01   0
   3  -9  -9  135.54    2.12   0
   3  -8  -7   18.59    1.23   0
   3  -7  -6    2.14    1.30   0
   3  -5  -4  630.34    3.99   0
   3   4  -1 1784.88   14.25   0
   3   9  -2  121.57    2.26   0
   4  -8  -9   26.44    2.14   0
   4  -7  -7  231.13    2.36   0
   4  -6  -6  368.86    2.92   0
   4  -5  -5   42.59    1.29   0
   4   6  -2   55.12    2.41   0
   5  -7  -9   43.66    1.74   0
   5   2  -3   68.47    2.53   0
   5   6  -3  535.46    9.44   0
   5  11  -5    1.22    2.24   0
   7  -1  -7   73.99    1.85   0
   7   2  -6  126.67    2.78   0
  -9   3  -3  159.34    3.04   0
  -8   2  -2  291.96    3.61   0
  -8   6  -2    4.42    1.84   0
  -8   7  -2   34.67    2.20   0
  -7   2  -1  549.78    4.52   0
  -7   3  -1  563.94    4.25   0
  -7   4  -1  110.94    1.98   0
  -7   5  -1    5.28    1.16   0
  -7   6  -1   57.29    1.94   0
  -6   9  -1  183.70    2.56   0
  -5  -2  -1   80.82    3.90   0
  -5   1   0  711.99    5.59   0
  -5   7   0   50.61    1.40   0
  -5  10  -1   17.36    1.31   0
  -4  -9  -7   42.12    1.79   0
  -4  11  -1  181.82    2.24   0
  -3  -8  -5    0.52    1.04   0
  -3   9   0   91.30    1.62   0
  -3  13  -2    0.38    1.57   0
  -2 -10  -8    3.16    1.62   0
  -2   9   0  118.41    1.73   0
  -1 -10  -8   97.23    1.98   0
  -1  -8  -5   79.13    1.86   0
  -1   9   0   46.06    1.29   0
  -1  13  -2  146.29    2.12   0
   0 -10  -9    0.12    2.15   0
   0  -7  -4  105.23    1.78   0
   0   8   0   -0.96    0.87   0
   0  11  -1  110.64    1.78   0
   0  13  -2    5.81    1.75   0
   1  -9  -7  207.95    2.27   0
   1  10  -1   26.87    1.23   0
   1  12  -2   12.56    1.27   0
   2  -9  -8   93.30    1.83   0
   2  11  -2  287.30    2.90   0
   3  -8  -8   10.55    1.77   0
   3  -6  -5  118.99    1.82   0
   3   5  -1  249.52    4.37   0
   4  -8 -10   41.66    2.45   0
   4  -7  -8   55.10    1.94   0
   4   2  -2 1877.14   14.29   0
   5  -6  -8    0.17    1.27   0
   5  -5  -7  101.87    2.10   0
   5  -4  -6  172.32    2.43   0
   5  -3  -5  123.78    2.00   0
   5  -1  -4   70.76    1.90   0
   6  -5  -9    5.83    1.51   0
   6  -2  -6  150.54    2.23   0
   6   0  -5    0.53    1.16   0
   7  -3  -9   15.25    1.66   0
   7  -2  -8  162.23    2.43   0
   7   0  -7  148.61    2.74   0
   7   3  -6    2.34    1.50   0
   7   4  -6   15.31    1.98   0
   7   5  -6    0.37    1.76   0
  -9   2  -3    0.06    2.27   0
  -8   1  -2    0.26    1.51   0
  -7   7  -1   17.80    1.38   0
  -7   8  -1   72.73    2.10   0
  -6  -7  -6   36.00    2.30   0
  -6   4   0    4.46    1.26   0
  -6   5   0    0.40    1.31   0
  -6   6   0   17.07    1.40   0
  -6  10  -1  165.79    2.63   0
  -5  -7  -5    2.21    1.48   0
  -5   8   0  150.06    1.96   0
  -5  11  -1    4.00    1.36   0
  -4   9   0  138.94    1.87   0
  -4  12  -1    3.28    1.78   0
  -3  -9  -7    6.36    1.66   0
  -3  -1   0  188.29    5.50   0
  -3   4   1 1719.11    7.04   0
  -3   5   1  237.78    2.68   0
  -3  10   0  239.25    2.28   0
  -3  12  -1   37.18    1.49   0
  -2  -8  -5  423.07    3.41   0
  -2  -7  -4   54.95    1.87   0
  -2  -6  -3   94.10    2.11   0
  -2   4   1  249.67    2.98   0
  -2   5   1 1578.21    6.51   0
  -2  10   0    1.41    0.96   0
  -2  12  -1   39.84    1.49   0
  -1 -10  -9    0.00    1.72   0
  -1  -9  -7   13.51    1.66   0
  -1  -7  -4   89.97    1.69   0
  -1  -6  -3   14.21    1.00   0
  -1  10   0  801.94    4.32   0
  -1  12  -1  110.02    1.83   0
   0  -9  -7   20.46    1.24   0
   0   9   0    0.59    0.88   0
   1  -9  -8   80.18    1.78   0
   1  -8  -6  529.47    3.46   0
   1  -7  -5  275.28    2.83   0
   1  -5  -3  307.33    3.02   0
   1   7   0  417.98    3.62   0
   2  -9  -9    2.08    1.50   0
   2  -8  -7  186.93    2.19   0
   2   9  -1  173.33    2.43   0
   2  13  -3    3.72    1.52   0
   3  -3  -3   48.93    1.44   0
   3  -1  -2 2070.86    9.55   0
   3   6  -1   97.08    2.60   0
   3  10  -2  565.86    4.60   0
   3  12  -3  246.04    3.27   0
   4  -6  -7   66.80    1.89   0
   4  -3  -4 1186.98    5.67   0
   4  -1  -3  185.53    2.84   0
   4   7  -2    0.93    1.19   0
   4  10  -3   32.31    1.57   0
   4  12  -4    6.91    2.16   0
   5  -6  -9    8.55    1.91   0
   5   3  -3  217.84    4.86   0
   6  -5 -10    2.43    2.10   0
   6  -4  -8   14.63    1.36   0
   6  -3  -7  460.38    3.50   0
   7  -2  -9   15.21    2.14   0
   7  -1  -8  228.87    3.10   0
  -7  -6  -6   -0.04    2.04   0
  -7   1  -1    6.51    1.36   0
  -7   9  -1  166.80    2.74   0
  -6  -1  -1   34.46    1.93   0
  -6   3   0  325.88    3.17   0
  -6   7   0  153.47    2.09   0
  -5  -8  -7   29.24    2.28   0
  -5  -6  -4   23.50    1.65   0
  -5  -5  -3   25.63    1.76   0
  -5   9   0   10.89    1.18   0
  -5  12  -1   -1.32    2.07   0
  -4  -9  -8   11.55    1.79   0
  -4   5   1   92.75    1.81   0
  -4  10   0    0.08    1.02   0
  -3   3   1 1854.08    7.66   0
  -3   6   1   97.57    1.69   0
  -3   7   1   34.90    1.36   0
  -3  13  -1    0.23    1.87   0
  -2  -9  -7   69.02    1.72   0
  -2   3   1 1231.68    6.64   0
  -2   6   1   11.60    1.00   0
  -2   7   1 1484.72    5.90   0
  -2  11   0   53.12    1.62   0
  -2  13  -1    0.25    1.89   0
  -1   4   1 1979.69    8.19   0
  -1   5   1 1493.44    6.55   0
  -1   6   1  925.85    5.06   0
  -1  14  -2   57.41    1.93   0
   0  -9  -8  310.47    3.08   0
   0  -8  -6   94.04    1.75   0
   0  12  -1    4.96    1.15   0
   1  -9  -9   -1.83    2.07   0
   1  -6  -4  221.77    2.46   0
   1   8   0  517.15    3.89   0
   1  11  -1    5.79    1.02   0
   1  13  -2    3.04    1.40   0
   2  -9 -10    6.54    1.80   0
   2  -7  -6   -0.68    0.92   0
   2  -4  -3   -0.46    0.76   0
   2   0  -1    3.43    1.70   0
   2  12  -2    0.31    1.23   0
   3  -8  -9    2.64    1.40   0
   3  -7  -7   65.89    1.54   0
   3  -6  -6    5.83    1.26   0
   3  -4  -4   94.67    1.91   0
   3   7  -1   33.65    1.62   0
   4  -7  -9   26.56    1.52   0
   4  -5  -6    1.97    0.93   0
   4  -4  -5   74.12    1.51   0
   5  -6 -10   51.61    2.32   0
   5  -5  -8  145.83    2.34   0
   5  -2  -5  126.14    2.23   0
   5  10  -4   52.26    2.43   0
   6  -4  -9    4.95    1.45   0
   6  -1  -6    2.01    1.26   0
   6   1  -5   -0.04    1.21   0
   7   1  -7   71.20    2.16   0
  -9   1  -3   23.53    2.43   0
  -8   4  -1   24.68    1.78   0
  -8   5  -1   52.08    2.09   0
  -8   6  -1    0.69    1.91   0
  -6  -6  -5   76.09    2.62   0
  -6   2   0  137.97    2.31   0
  -6   8   0  299.25    2.65   0
  -6   9   0  178.11    2.40   0
  -6  11  -1   -0.64    1.63   0
  -5  10   0   35.19    1.45   0
  -4   3   1  150.39    2.42   0
  -4   4   1    1.06    0.79   0
  -4   6   1  343.83    2.86   0
  -4   7   1   27.58    1.14   0
  -4  11   0   72.16    1.62   0
  -3  -9  -8   44.49    1.77   0
  -3  -8  -6    0.75    1.36   0
  -3  -3  -1 1242.06   12.54   0
  -3   8   1   88.63    1.68   0
  -3  11   0   97.40    1.70   0
  -2  -9  -8   18.52    1.93   0
  -2  -8  -6    1.14    1.41   0
  -2   8   1    3.62    0.98   0
  -1  -9  -8   -0.98    1.32   0
  -1  -8  -6  127.12    2.05   0
  -1   3   1 3313.34   11.60   0
  -1   7   1  142.77    2.04   0
  -1  11   0   28.71    1.24   0
  -1  13  -1  120.69    2.05   0
   0  -7  -5  128.95    2.14   0
   0  -4  -2  152.76    2.45   0
   0  10   0   83.15    1.61   0
   0  14  -2  116.25    2.21   0
   1  -9 -10   30.95    2.20   0
   1  -8  -7  205.20    2.33   0
   1   9   0   45.92    1.66   0
   2  -8  -8   11.58    1.20   0
   2  -6  -5   95.90    1.60   0
   2  -5  -4 1120.42    5.28   0
   2  10  -1  376.97    3.35   0
   3  -8 -10   55.22    1.87   0
   3  -7  -8   21.79    1.63   0
   3  -5  -5   65.72    1.43   0
   3  11  -2   90.41    2.30   0
   4  -7 -10   46.54    1.81   0
   4  -6  -8  236.74    2.42   0
   4   8  -2   76.91    2.42   0
   4  11  -3    5.79    1.66   0
   5  -4  -7  289.78    2.71   0
   5  -3  -6   11.24    0.98   0
   5   0  -4   -0.03    0.90   0
   5   7  -3  100.47    3.75   0
   6  -4 -10   16.08    2.24   0
   6  -3  -8   23.88    1.36   0
   6  -2  -7   60.56    1.61   0
   6   9  -5    0.40    2.22   0
   7  -1  -9   21.56    2.19   0
   7   0  -8    0.59    1.66   0
   7   2  -7   50.22    2.16   0
  -9   4  -2   19.56    1.84   0
  -8   0  -2  323.82    4.52   0
  -8   3  -1  234.91    3.20   0
  -8   7  -1   18.72    1.66   0
  -7  -5  -5   14.63    2.43   0
  -7   4   0   56.74    1.88   0
  -7   5   0    1.41    1.10   0
  -7   6   0   71.11    1.66   0
  -7   7   0   40.62    1.91   0
  -6  10   0   13.43    1.98   0
  -5   0   0    0.47    0.76   0
  -5   4   1  110.72    2.03   0
  -5   5   1   22.59    1.21   0
  -5   6   1   47.07    1.36   0
  -5   7   1   38.98    1.63   0
  -5  11   0    1.59    1.40   0
  -4  -8  -7  127.98    2.61   0
  -4   8   1  424.36    3.07   0
  -4   9   1   23.60    1.45   0
  -4  12   0   22.60    1.98   0
  -3  -9  -9  147.56    2.78   0
  -3   2   1 1914.26    8.67   0
  -3   9   1   29.86    1.17   0
  -3  12   0   22.59    1.35   0
  -2  -3  -1    5.85    1.17   0
  -2   2   1  837.65    6.17   0
  -2   9   1  189.18    2.14   0
  -2  12   0    1.42    1.23   0
  -1  -9  -9  129.81    2.41   0
  -1  -7  -5  492.20    3.82   0
  -1   8   1  676.73    4.02   0
  -1  12   0  226.52    2.56   0
   0  -9 -10   -0.33    2.28   0
   0  -9  -9  298.11    2.82   0
   0  -8  -7    0.07    1.04   0
   0  -6  -4 1062.23    5.26   0
   0  -5  -3  312.04    3.10   0
   0   5   1  386.61    3.75   0
   0   6   1  132.55    2.37   0
   0  11   0    0.46    1.02   0
   0  13  -1  208.36    2.51   0
   1  -8  -8   35.64    1.77   0
   1  -7  -6  622.68    3.76   0
   1  -3  -2  838.56    5.72   0
   1  12  -1    8.19    1.23   0
   1  14  -2   39.98    1.87   0
   2  -8  -9  175.96    2.22   0
   2  -7  -7    4.64    1.04   0
   2  -2  -2  113.33    2.33   0
   2   5   0  422.31    4.86   0
   2   6   0 1672.08    8.58   0
   2  11  -1   82.56    1.98   0
   2  13  -2   15.54    2.01   0
   3  -7  -9   -0.25    1.73   0
   3  -6  -7   28.10    1.56   0
   3   8  -1   89.54    2.24   0
   3  13  -3    0.41    1.61   0
   4  -6  -9    3.07    1.73   0
   4  -5  -7  721.46    4.06   0
   4  -2  -4  135.28    2.16   0
   5  -5  -9    2.03    1.27   0
   5   4  -3  957.96   12.81   0
   6  -3  -9   22.86    1.93   0
   6   0  -6  196.80    2.86   0
   6   2  -5   85.51    2.38   0
  -9   3  -2    4.84    1.66   0
  -8   2  -1   72.92    2.18   0
  -7   0  -1  810.87    6.82   0
  -7   3   0  119.55    2.30   0
  -7   8   0  226.21    2.56   0
  -7   9   0    5.80    1.90   0
  -6  -7  -7   54.07    2.17   0
  -6  -5  -4    2.02    1.53   0
  -6  -4  -3   17.44    2.31   0
  -6   1   0    0.44    0.93   0
  -6  11   0    2.79    2.26   0
  -5  -7  -6    1.02    1.56   0
  -5   3   1   32.93    1.46   0
  -5   8   1  400.47    3.04   0
  -5   9   1  211.31    2.50   0
  -5  12   0    5.53    2.29   0
  -4  -6  -4    1.06    1.16   0
  -4  -4  -2  217.55    4.45   0
  -4   2   1  175.24    2.63   0
  -4  10   1  217.14    2.55   0
  -3  -8  -7  173.75    2.72   0
  -3  -7  -5    8.13    1.07   0
  -3  10   1   -0.14    1.04   0
  -3  13   0   28.62    2.08   0
  -2  -9  -9    0.31    1.56   0
  -2  -7  -5  423.42    3.50   0
  -2  10   1  386.45    2.93   0
  -2  13   0    9.86    1.78   0
  -1  -9 -10   18.58    1.85   0
  -1  -8  -7    0.24    1.14   0
  -1  -6  -4   58.58    1.72   0
  -1  -4  -2  613.74    5.14   0
  -1   9   1    4.81    0.91   0
  -1  14  -1    0.50    1.69   0
   0   4   1 1174.76    6.86   0
   0   7   1  128.49    2.04   0
   0   8   1   59.93    1.75   0
   1  -8  -9   65.47    2.12   0
   1  -6  -5 1582.33    6.08   0
   1  10   0  763.32    4.52   0
   1  13  -1   30.35    1.87   0
   2  -8 -10   17.40    1.64   0
   2  -6  -6   15.37    1.34   0
   2   7   0  294.84    3.38   0
   3  -7 -10   37.34    2.18   0
   3  -5  -6   60.31    1.72   0
   3  -2  -3  651.52    4.68   0
   3   9  -1   32.11    1.58   0
   4  -6 -10   37.46    2.16   0
   4  -4  -6  332.48    2.91   0
   4  -3  -5    4.63    0.88   0
   4   0  -3    0.34    0.78   0
   4   3  -2  795.04   12.25   0
   4   9  -2   73.57    2.31   0
   5  -5 -10   11.58    1.57   0
   5  -4  -8   50.74    1.54   0
   5  -3  -7  264.64    2.79   0
   5  -1  -5   34.16    1.36   0
   5   8  -3  502.34    6.98   0
   5  11  -4    0.42    2.09   0
   6  -3 -10   11.89    2.16   0
   6  -2  -8  480.36    3.64   0
   6  -1  -7  313.25    3.10   0
   7   0  -9    4.87    1.86   0
   7   1  -8  217.20    2.91   0
   7   3  -7   45.29    2.11   0
  -9   0  -3   39.17    2.67   0
  -9   2  -2    2.95    2.19   0
  -6   5   1    6.54    1.02   0
  -6   6   1   95.95    1.74   0
  -6   7   1  118.29    1.86   0
  -6   8   1    0.01    1.53   0
  -5  10   1   49.43    1.93   0
  -4  -8  -8  139.77    2.63   0
  -4  -5  -3  304.81    4.24   0
  -4  -1   0    8.81    1.34   0
  -4  11   1   40.90    1.87   0
  -4  13   0   -0.05    1.71   0
  -3  11   1    2.14    1.16   0
  -2  -8  -7   94.09    1.86   0
  -2  -6  -4 1422.15    6.81   0
  -2  11   1   77.34    1.88   0
  -1  -5  -3  612.98    4.53   0
  -1   2   1  147.45    3.07   0
  -1  10   1   22.60    1.15   0
  -1  13   0    9.53    1.39   0
   0  -8  -8   90.29    1.76   0
   0  -7  -6    2.76    0.95   0
   0  -2  -1   31.93    1.81   0
   0   9   1    4.11    1.26   0
   0  12   0  360.50    2.97   0
   0  14  -1    8.64    1.66   0
   1  -8 -10    2.02    1.87   0
   1  -7  -7   67.29    1.56   0
   1  -5  -4  338.55    3.05   0
   1  -4  -3   26.14    1.15   0
   1  11   0   22.81    1.57   0
   2  -7  -8   52.11    1.46   0
   2  -5  -5  125.43    1.91   0
   2  -3  -3  191.93    2.52   0
   2   4   0  416.20    5.52   0
   2   8   0 1036.09    5.91   0
   2  12  -1    0.35    1.69   0
   3  -7 -11    0.23    1.81   0
   3  -6  -8   62.84    1.51   0
   3  -4  -5   25.90    1.16   0
   3  -3  -4   70.74    1.60   0
   3   0  -2    0.04    0.94   0
   3  12  -2  104.86    2.16   0
   4  -6 -11   -0.38    1.76   0
   4  -5  -8  128.18    1.91   0
   4  12  -3    1.23    2.13   0
   5  -4  -9   12.31    1.31   0
   5  -2  -6   53.60    1.48   0
   5   1  -4   69.49    1.92   0
   6  -2  -9    9.02    1.82   0
   6   3  -5    0.02    1.31   0
   7   4  -7   23.31    2.08   0
  -8  -2  -3    0.43    2.62   0
  -8   5   0  256.36    3.10   0
  -8   6   0    1.88    1.42   0
  -8   7   0   19.37    1.65   0
  -8   8   0   20.64    2.35   0
  -7  -4  -4  147.59    4.84   0
  -7  -2  -2   40.23    3.26   0
  -7   2   0   19.97    1.22   0
  -6   4   1  205.92    2.49   0
  -6   9   1    6.04    1.30   0
  -6  10   1   24.29    1.86   0
  -5  -6  -5  132.37    2.74   0
  -5   2   1    4.30    0.87   0
  -5  11   1  277.80    2.60   0
  -4  -8  -9    9.47    2.38   0
  -4  12   1   97.54    2.19   0
  -3  -8  -8   11.76    1.43   0
  -3  -4  -2   41.68    1.88   0
  -3   1   1  351.19    4.26   0
  -3   6   2   29.21    1.31   0
  -3   7   2   11.07    1.22   0
  -3  12   1   35.02    1.85   0
  -2  -8  -8  134.61    2.32   0
  -2  -5  -3 1575.66    7.75   0
  -2  12   1    0.66    1.52   0
  -2  14   0   15.60    1.74   0
  -1  -8  -8  279.18    2.74   0
  -1  -7  -6  118.68    1.93   0
  -1  11   1    3.27    0.99   0
   0  -8  -9   24.13    1.48   0
   0  -6  -5  123.75    2.17   0
   0   3   1  438.96    4.87   0
   0  10   1  131.69    2.11   0
   0  13   0    0.56    1.77   0
   1  -8 -11   18.28    1.90   0
   1  -1  -1  258.57    4.47   0
   1  14  -1    0.43    2.05   0
   2  -7  -9   18.93    1.40   0
   2  -6  -7   17.91    1.29   0
   2  -4  -4   38.98    1.26   0
   2   9   0  114.30    2.05   0
   3  -6  -9   28.53    1.66   0
   3  10  -1   -0.75    1.38   0
   4  -5  -9   23.29    1.27   0
   4  -4  -7   94.98    1.72   0
   4  -1  -4  174.33    2.62   0
   4  10  -2  184.00    3.19   0
   5  -4 -10  203.48    2.49   0
   5  -3  -8   91.66    2.03   0
   6  -1  -8   74.66    2.01   0
   6   0  -7   -1.20    1.44   0
   6   1  -6    3.46    1.01   0
   7   1  -9   25.04    1.75   0
   7   2  -8  178.78    2.84   0
  -9   1  -2   32.54    2.31   0
  -9   4  -1   45.54    1.99   0
  -8   1  -1  690.27    5.84   0
  -8   4   0  159.24    2.43   0
  -7   5   1    4.61    1.41   0
  -7   6   1  190.86    2.31   0
  -7   7   1    8.82    1.31   0
  -7   8   1    2.37    1.89   0
  -6  -6  -6  194.01    3.41   0
  -6   3   1   27.00    1.23   0
  -6  11   1    8.54    2.29   0
  -5  12   1    0.02    1.65   0
  -4   1   1  784.40    5.88   0
  -4   5   2  908.82    4.62   0
  -4   6   2   56.32    1.43   0
  -4   8   2   80.10    1.53   0
  -4   9   2   70.21    1.79   0
  -3  -8  -9   70.77    2.35   0
  -3  -7  -6  172.23    2.42   0
  -3   5   2   16.36    0.97   0
  -3   8   2  140.65    1.91   0
  -3   9   2  124.14    1.81   0
  -3  13   1   12.57    1.92   0
  -2  -8  -9   26.88    1.92   0
  -2  -7  -6   37.74    1.42   0
  -2   1   1 3537.29   14.46   0
  -2   5   2   -0.19    1.14   0
  -2   6   2  602.11    3.89   0
  -2   7   2  294.41    2.70   0
  -2   8   2  704.84    3.93   0
  -2   9   2  272.26    2.62   0
  -1  -8 -10   -1.09    2.20   0
  -1  -8  -9   73.09    1.78   0
  -1  12   1    7.65    1.62   0
  -1  14   0    0.04    1.61   0
   0  -8 -11   23.11    1.91   0
   0  -8 -10  141.89    2.23   0
   0  -7  -7    6.88    1.07   0
   0  11   1  109.75    2.10   0
   1  -7  -8    0.32    1.09   0
   1  -6  -6  271.05    2.64   0
   1   6   1   24.77    1.18   0
   1   7   1  823.96    5.05   0
   1   8   1   23.40    1.44   0
   1  12   0  207.97    2.45   0
   2  -7 -11    9.36    1.68   0
   2  -7 -10   -0.18    1.41   0
   2  10   0    0.26    0.96   0
   2  13  -1   17.22    2.04   0
   3  -6 -10    0.48    1.29   0
   3  -5  -7  552.16    3.52   0
   3  13  -2   97.26    2.25   0
   4  -5 -10   40.63    1.61   0
   4  -3  -6    1.31    0.92   0
   4  -2  -5  132.43    2.18   0
   5  -4 -11   26.62    1.84   0
   5  -2  -7  397.00    3.43   0
   5  -1  -6   18.40    1.33   0
   5   0  -5 1998.98    8.48   0
   5   9  -3   28.66    2.09   0
   6  -2 -10    2.10    1.56   0
   6  10  -5   46.84    3.63   0
   7   3  -8  121.22    2.89   0
   7   5  -7   27.69    2.17   0
   7   6  -7    4.59    2.47   0
  -9   3  -1   85.38    2.70   0
  -8   3   0  169.17    2.85   0
  -7   1   0  103.52    2.46   0
  -7   4   1   -0.12    1.41   0
  -7   9   1    2.13    1.53   0
  -6   0   0  559.66    5.53   0
  -5   5   2 1398.84    6.05   0
  -5   6   2   76.15    1.57   0
  -5   7   2  926.07    4.54   0
  -5   8   2   27.75    1.24   0
  -5   9   2  117.69    1.80   0
  -4  -7  -7   90.64    2.30   0
  -4   4   2  947.75    4.97   0
  -4  10   2  192.79    2.17   0
  -4  13   1   55.86    1.91   0
  -3   4   2   73.91    1.65   0
  -3  10   2  571.25    3.50   0
  -2  -8 -10    1.19    1.67   0
  -2   4   2 1862.72    7.45   0
  -2  10   2    2.12    1.02   0
  -2  13   1   17.68    1.49   0
  -1  -7  -7   64.72    1.52   0
  -1  -6  -5  126.51    1.98   0
  -1   6   2   25.27    1.10   0
  -1   7   2  374.63    3.08   0
  -1   8   2   40.65    1.27   0
  -1  13   1   33.70    1.85   0
   0  -7  -8  595.98    3.89   0
   0  -5  -4  146.29    2.10   0
   0  -4  -3   16.77    1.31   0
   0  -3  -2 1710.05    8.52   0
   0  14   0    0.42    1.57   0
   1  -7 -10  134.17    2.42   0
   1  -7  -9   14.89    1.27   0
   1  -5  -5   70.14    1.78   0
   1   5   1  714.71    5.36   0
   1   9   1  158.20    2.19   0
   1  13   0    4.94    1.95   0
   2  -6  -8  330.71    2.81   0
   2  -5  -6   12.82    0.98   0
   2  11   0   53.01    1.85   0
   3  -6 -11  244.78    2.69   0
   3  -5  -8   36.37    1.29   0
   3  -4  -6    1.06    0.83   0
   3  -1  -3  118.19    2.43   0
   3  11  -1    1.96    1.16   0
   4  -5 -11  107.62    2.13   0
   4  -4  -8  117.25    1.83   0
   4   1  -3  182.78    3.31   0
   4  11  -2   -0.29    1.71   0
   5  -3  -9    8.86    1.22   0
   5   2  -4   18.71    1.52   0
   6  -1  -9  223.68    2.63   0
   6   2  -6  155.58    2.86   0
   6   4  -5  124.91    3.16   0
   7   2  -9   17.88    1.72   0
   7   7  -7   68.57    3.65   0
  -8  -1  -2    0.22    2.07   0
  -8   7   1   15.09    2.00   0
  -8   8   1    3.39    2.10   0
  -7  -5  -6  333.73    4.91   0
  -7  -3  -3  378.21   10.64   0
  -6   2   1   59.83    1.70   0
  -6   6   2  146.93    2.25   0
  -6   7   2   35.29    1.34   0
  -6   8   2  121.97    1.87   0
  -6   9   2   -0.19    1.73   0
  -5  -5  -4   50.34    2.08   0
  -5   1   1   56.89    1.90   0
  -5   4   2   47.02    1.64   0
  -5  10   2  123.48    1.90   0
  -5  11   2   48.52    2.10   0
  -4  11   2   -0.25    1.24   0
  -3  -7  -7  165.58    2.37   0
  -3  -6  -5  697.14    4.95   0
  -3   3   2  924.95    5.50   0
  -3  11   2   96.80    1.72   0
  -2  -7  -7    1.80    1.03   0
  -2  -6  -5  112.24    1.98   0
  -2  11   2  287.74    2.60   0
  -2  14   1   18.53    1.76   0
  -1  -7  -8    8.24    1.58   0
  -1   5   2  299.33    3.01   0
  -1   9   2   35.95    1.29   0
  -1  10   2    0.53    0.94   0
   0  -7  -9  185.21    2.48   0
   0  -6  -6  227.55    2.51   0
   0  12   1    6.04    1.21   0
   1  -7 -11  101.46    2.12   0
   1  -6  -7   47.58    1.37   0
   1  -4  -4   84.97    1.84   0
   1  10   1   37.35    1.48   0
   2  -6 -10   74.77    2.13   0
   2  -6  -9  315.86    2.83   0
   2  -4  -5  348.11    3.04   0
   2  -1  -2 2008.51    9.95   0
   3  -5  -9    2.12    1.45   0
   3  -3  -5   76.82    1.73   0
   3  -2  -4  550.50    4.12   0
   3  12  -1   38.81    2.06   0
   4  -4  -9   17.05    1.27   0
   4  -3  -7  555.40    3.69   0
   5  -3 -11    8.87    1.64   0
   5  -3 -10   80.95    1.82   0
   5  -2  -8  103.38    1.86   0
   5   5  -3    5.46    2.32   0
   5  10  -3   96.58    3.01   0
   6  -1 -11   20.42    2.34   0
   6  -1 -10    2.51    1.45   0
   6   0  -8  939.19    5.32   0
   6   1  -7  308.92    3.35   0
   7   3  -9   14.20    2.24   0
   7   4  -8   20.52    2.02   0
  -9   2  -1   65.35    2.63   0
  -9   5   0  213.99    2.92   0
  -8   2   0  292.59    3.65   0
  -8   5   1    8.44    1.70   0
  -8   6   1   10.36    1.49   0
  -7  -1  -1    6.70    1.71   0
  -7   3   1  198.10    2.63   0
  -6  -6  -7   -0.30    1.52   0
  -6  -5  -5    1.06    1.60   0
  -6   5   2  682.32    4.22   0
  -6  10   2   -1.83    1.46   0
  -6  11   2    0.51    2.25   0
  -5  -6  -6   22.05    1.71   0
  -5  -1   0  733.10    8.40   0
  -5  12   2   21.46    1.78   0
  -4  -7  -8   10.51    1.44   0
  -4   3   2  725.29    4.74   0
  -4  12   2   51.63    1.71   0
  -3  -7  -8  337.04    3.42   0
  -3  12   2  102.66    1.83   0
  -2  -7  -8   56.14    1.88   0
  -2   3   2  393.10    3.85   0
  -2  12   2    1.29    1.19   0
  -1  -7  -9   15.11    1.76   0
  -1  -6  -6   95.78    2.03   0
  -1  -5  -4   15.62    1.08   0
  -1   4   2 2321.34    8.68   0
  -1  11   2   49.42    1.43   0
  -1  14   1    0.10    1.65   0
   0  -7 -11   71.14    1.99   0
   0  -7 -10   43.75    1.68   0
   0   7   2  273.87    2.91   0
   0   8   2  234.44    2.47   0
   0   9   2   11.03    1.27   0
   0  13   1  207.86    2.48   0
   1  -6  -8  146.81    2.06   0
   1  -3  -3  219.96    2.84   0
   1  -2  -2 2097.30    9.72   0
   1   4   1  273.20    3.73   0
   1  11   1  343.28    3.06   0
   1  14   0   -0.92    1.67   0
   2  -6 -12   -0.62    1.85   0
   2  -6 -11   20.11    1.64   0
   2  -5  -7   20.24    1.14   0
   2  -3  -4  457.93    3.68   0
   2  -2  -3  381.11    3.82   0
   2   3   0  469.78    7.63   0
   2  12   0   -0.35    1.25   0
   3  -5 -12   -0.34    2.38   0
   3  -5 -11    0.37    1.83   0
   3  -5 -10   20.61    1.47   0
   3  -4  -7   29.92    1.22   0
   4  -4 -12  129.26    2.69   0
   4  -4 -11  237.48    2.66   0
   4  -4 -10  174.68    2.29   0
   4  -2  -6  131.83    2.21   0
   4  12  -2   44.33    2.38   0
   5  -2  -9   -0.22    1.46   0
   5  -1  -7   18.32    1.20   0
   5   1  -5   32.90    1.71   0
   6   0  -9   -0.09    1.30   0
   6   5  -5  252.82    4.84   0
   7   5  -8  140.22    3.37   0
  -9   4   0   32.62    2.39   0
  -8   0  -1   -0.39    1.47   0
  -8   4   1   36.65    1.86   0
  -7   6   2   18.64    1.62   0
  -7   7   2  109.98    1.97   0
  -7   8   2    1.33    1.40   0
  -7   9   2    7.63    1.56   0
  -6  -6  -8    0.31    2.31   0
  -6   4   2  345.29    3.15   0
  -5   3   2  750.71    4.79   0
  -4  -7  -9   34.36    1.87   0
  -4  -5  -4  449.74    4.59   0
  -4   7   3   51.69    1.66   0
  -4   8   3    6.79    1.37   0
  -4   9   3  122.56    1.99   0
  -3  -7  -9   61.73    2.15   0
  -3   7   3  185.74    2.34   0
  -3   8   3  125.67    1.95   0
  -3   9   3  101.65    1.92   0
  -3  13   2   97.71    2.00   0
  -2  -7  -9   10.38    1.40   0
  -2  -5  -4   37.50    1.66   0
  -2  13   2   19.67    1.51   0
  -1  -7 -11   10.90    1.72   0
  -1  -7 -10   30.62    1.63   0
  -1  -4  -3   82.54    2.07   0
  -1   1   1  258.90    4.63   0
  -1  12   2   12.65    1.31   0
   0  -6  -7  216.61    2.41   0
   0  -5  -5  735.90    4.51   0
   0   2   1   32.55    1.89   0
   0   6   2  233.11    2.69   0
   0  10   2    6.62    1.04   0
   0  14   1    8.03    2.26   0
   1  -6  -9    2.69    1.13   0
   1  -5  -6 1296.33    5.56   0
   1  12   1  120.44    2.02   0
   2  -5  -8    6.06    0.99   0
   2  13   0   10.52    2.03   0
   3  -4  -8  382.14    3.25   0
   3  -3  -6 1682.03    6.58   0
   3   7   0  115.19    2.63   0
   3   8   0   34.09    1.73   0
   3   9   0   95.66    2.29   0
   3  13  -1   11.54    1.65   0
   4  -3  -8    1.74    0.95   0
   4  -1  -5    0.55    0.81   0
   4   0  -4  386.02    3.86   0
   5  -2 -11   23.64    2.22   0
   5  -2 -10  146.77    2.21   0
   5   0  -6    0.55    0.88   0
   5  11  -3   14.21    2.20   0
   6   0 -11    0.68    2.31   0
   6   0 -10    5.01    1.48   0
   6   1  -8   60.42    1.75   0
   6   2  -7   62.44    2.07   0
   6   3  -6   88.48    2.16   0
   7   4  -9   64.28    2.60   0
  -9  -1  -3   27.83    3.65   0
  -9   0  -2    0.36    2.47   0
  -7  -5  -7    0.07    2.31   0
  -7   2   1    1.70    1.31   0
  -7   5   2  269.60    2.75   0
  -6   1   1  364.12    4.14   0
  -5  -4  -3  297.15    4.78   0
  -5   6   3  539.05    3.66   0
  -5   7   3   98.80    1.69   0
  -5   8   3  495.40    3.38   0
  -5   9   3   24.43    1.24   0
  -5  10   3   87.44    1.78   0
  -4   2   2 1926.17    8.35   0
  -4   6   3  255.71    2.53   0
  -4  10   3   27.54    1.27   0
  -4  11   3    2.67    1.76   0
  -3  -7 -10   -0.06    1.61   0
  -3  -6  -6    1.79    1.01   0
  -3   2   2   14.01    1.36   0
  -3   6   3  251.14    2.50   0
  -3  10   3   75.54    1.57   0
  -3  11   3  325.62    2.97   0
  -2  -7 -11   12.08    1.86   0
  -2  -7 -10   67.73    1.90   0
  -2  -6  -6    8.39    0.99   0
  -2   7   3  166.43    2.06   0
  -2   8   3  259.88    2.56   0
  -2   9   3   27.50    1.19   0
  -2  10   3  644.43    3.92   0
  -1  -6  -7  282.35    2.92   0
  -1  13   2    2.87    1.40   0
   0  -6  -8  213.76    2.45   0
   0   5   2  606.92    4.49   0
   0  11   2   49.72    1.53   0
   1  -6 -12    0.57    1.82   0
   1  -6 -11   30.05    1.64   0
   1  -6 -10   98.89    1.89   0
   1  -5  -7  152.63    2.23   0
   1  13   1  122.75    2.15   0
   2  -5 -10   57.07    1.89   0
   2  -5  -9   51.08    1.50   0
   2  -4  -6  406.87    3.18   0
   2   7   1  477.47    4.30   0
   2   8   1  248.94    2.95   0
   2   9   1    0.59    0.85   0
   2  10   1   95.18    2.14   0
   3  -4  -9   13.79    1.47   0
   3   1  -2 2111.76   12.83   0
   3  10   0  227.52    3.12   0
   4  -3 -10   22.38    1.85   0
   4  -3  -9  140.52    2.00   0
   4  -2  -7  820.54    4.71   0
   4   8  -1  416.62    5.21   0
   4   9  -1   23.72    1.69   0
   5  -1  -8   51.68    1.53   0
   6   1  -9  237.01    3.08   0
   7   6  -8   10.32    2.19   0
  -9   3   0  129.62    2.63   0
  -8   3   1   57.34    2.11   0
  -8   7   2    1.76    1.55   0
  -8   8   2    0.59    1.73   0
  -7   0   0    0.37    1.31   0
  -7   4   2  415.69    3.68   0
  -6   3   2  566.26    4.21   0
  -6   7   3  177.32    2.17   0
  -6   8   3  152.66    2.05   0
  -6   9   3  224.86    2.42   0
  -6  10   3   90.12    1.93   0
  -5  -6  -8   72.42    2.48   0
  -5   2   2   80.13    1.95   0
  -5   5   3    7.07    1.32   0
  -5  11   3   13.74    1.52   0
  -4  -6  -7   -1.11    1.62   0
  -4   0   1    0.26    1.10   0
  -4   5   3  261.78    2.67   0
  -4  12   3    0.87    1.52   0
  -3   0   1 4264.58   17.43   0
  -3   5   3  170.11    2.27   0
  -3  12   3  247.53    2.58   0
  -2  -6  -7  310.78    3.15   0
  -2   6   3    0.61    0.82   0
  -2  11   3    8.54    1.19   0
  -2  12   3  154.35    2.32   0
  -1  -6  -8   11.06    1.55   0
  -1  -5  -5  133.10    2.09   0
  -1  -3  -2 2286.63   10.66   0
  -1   3   2  815.17    5.55   0
  -1   8   3   55.98    1.64   0
  -1   9   3   50.15    1.64   0
  -1  10   3    6.87    1.34   0
  -1  14   2   37.91    1.85   0
   0  -6 -12    0.00    1.81   0
   0  -6 -11   27.87    2.15   0
   0  -6 -10  277.08    2.68   0
   0  -6  -9   11.03    1.20   0
   0  -5  -6  689.83    4.38   0
   0  -4  -4  254.70    2.84   0
   0  12   2  178.22    2.23   0
   1  -4  -5  880.40    4.92   0
   1   8   2   59.68    1.76   0
   1   9   2  112.07    2.11   0
   1  14   1    0.02    2.30   0
   2  -5 -12   -0.60    1.68   0
   2  -5 -11   12.97    1.50   0
   2  -4  -7    7.91    1.42   0
   2  -3  -5  599.04    4.20   0
   2   6   1   35.51    1.62   0
   2  11   1   -0.25    1.49   0
   2  14   0   19.05    1.89   0
   3  -4 -12   14.06    1.65   0
   3  -4 -11  377.70    3.14   0
   3  -4 -10    2.48    1.20   0
   3  -3  -7   38.38    1.64   0
   3  -2  -5 1087.08    5.62   0
   3   6   0  100.68    2.52   0
   3  11   0   94.45    2.07   0
   4  -3 -12    0.16    1.76   0
   4  -3 -11   10.75    1.52   0
   4   7  -1   27.30    1.91   0
   4  10  -1  207.25    3.49   0
   5  -1 -10   18.51    1.90   0
   5  -1  -9    7.64    1.19   0
   5   0  -7  304.24    3.06   0
   5   3  -4   -0.36    1.21   0
   6   1 -11   22.85    2.44   0
   6   1 -10    2.81    1.84   0
   6   2  -8  499.53    4.30   0
   6   4  -6  140.98    3.03   0
   6   6  -5    0.15    1.87   0
  -9   1  -1   87.04    2.93   0
  -9   5   1   48.79    2.06   0
  -8   1   0  133.27    2.91   0
  -8   6   2   24.37    1.59   0
  -7  -4  -5   96.45    3.07   0
  -7   8   3    3.57    1.94   0
  -7   9   3   19.56    2.17   0
  -6  -5  -6  182.17    3.22   0
  -6   6   3    3.79    1.10   0
  -5  -6  -9   41.82    2.33   0
  -5  -5  -5   20.11    1.35   0
  -4  -6  -8  212.66    2.99   0
  -4   4   3  393.57    3.38   0
  -3  -6  -7  384.15    3.42   0
  -3   4   3   17.36    1.33   0
  -3  13   3    1.41    1.61   0
  -2  -6  -8   -0.45    1.51   0
  -2  -4  -3 1564.67    8.09   0
  -2   2   2  106.68    2.31   0
  -2   5   3  127.34    1.94   0
  -2  13   3    3.08    2.06   0
  -1  -6 -11    0.20    2.11   0
  -1  -6 -10  109.71    2.32   0
  -1  -6  -9  169.69    2.22   0
  -1   6   3  438.59    3.50   0
  -1   7   3   86.65    1.65   0
  -1  11   3   10.29    1.14   0
   0   4   2  155.50    2.69   0
   0  13   2    7.28    1.44   0
   1  -5  -9   99.82    2.11   0
   1  -5  -8   -0.29    0.97   0
   1   3   1  781.91    7.18   0
   1   7   2    6.76    0.92   0
   1  10   2  401.11    3.32   0
   1  11   2  117.51    2.27   0
   2  12   1   40.91    2.02   0
   3  -1  -4  150.10    2.39   0
   3   0  -3 2608.13   10.94   0
   3  12   0   20.34    1.99   0
   4  -2  -8   18.93    1.18   0
   4  -1  -6    0.45    0.81   0
   4   2  -3  600.77    6.27   0
   4  11  -1   41.88    2.15   0
   5  -1 -11    2.67    1.50   0
   5   1  -6   16.26    1.17   0
   5   2  -5  126.90    2.61   0
   6   3  -7  454.73    4.48   0
  -9   2   0   18.23    2.02   0
  -9   4   1   53.46    2.47   0
  -8   5   2   20.23    1.56   0
  -7   3   2   14.37    1.51   0
  -7   6   3    2.82    1.65   0
  -7   7   3    0.31    1.28   0
  -6  -4  -4    5.35    1.51   0
  -6   2   2   86.49    2.12   0
  -6   5   3   -0.18    1.03   0
  -5   0   1  386.99    4.69   0
  -5   4   3  951.80    5.05   0
  -4  -6 -10    8.95    2.18   0
  -4  -6  -9   89.58    2.10   0
  -4  -4  -3   48.69    2.00   0
  -4   8   4    0.21    1.21   0
  -4   9   4   31.40    1.62   0
  -4  10   4  111.65    2.17   0
  -3  -6 -11    0.51    2.50   0
  -3  -6 -10    0.42    2.07   0
  -3  -6  -9  178.61    2.75   0
  -3  -6  -8   27.34    1.45   0
  -3  -5  -5  118.39    2.37   0
  -3   9   4    6.44    1.27   0
  -2  -6 -11    3.06    1.68   0
  -2  -6 -10   12.35    1.82   0
  -2  -6  -9    0.12    1.20   0
  -2  -5  -5   28.06    1.23   0
  -1  -5  -6   52.28    1.68   0
  -1  12   3    1.66    1.23   0
  -1  13   3   71.32    2.20   0
   0  -5  -7   40.25    1.38   0
   0  -3  -3  520.87    4.48   0
   0   9   3   23.61    1.47   0
   0  10   3  596.18    3.93   0
   0  14   2  110.15    2.21   0
   1  -5 -12    2.57    1.70   0
   1  -5 -11    0.27    1.39   0
   1  -5 -10  341.33    2.89   0
   1  -4  -6   59.89    1.48   0
   1  -3  -4   62.83    1.57   0
   1   6   2    3.96    0.92   0
   1  12   2    0.72    1.21   0
   2  -4 -12    0.49    2.16   0
   2  -4  -9   -2.53    1.33   0
   2  -4  -8  128.37    1.85   0
   2  -2  -4  211.60    2.70   0
   2   1  -1 3667.68   23.78   0
   2  13   1    1.00    1.97   0
   3  -3  -9    0.14    1.46   0
   3  -3  -8  241.76    2.51   0
   3  -2  -6   50.67    1.70   0
   3  13   0   31.77    2.33   0
   4  -2 -12   31.24    1.79   0
   4  -2 -11   15.64    1.48   0
   4  -2 -10   31.05    1.42   0
   4  -2  -9   14.49    1.19   0
   4   0  -5    1.28    0.87   0
   4   1  -4  171.21    2.94   0
   4  12  -1   91.66    2.57   0
   5   0  -9    2.32    1.63   0
   5   0  -8    0.64    1.02   0
   6   2 -10    2.76    2.12   0
   6   2  -9   10.95    1.39   0
  -8   2   1  183.44    3.04   0
  -8   4   2   45.81    2.06   0
  -7   1   1    5.11    1.05   0
  -7   5   3   11.40    1.63   0
  -6  -5  -7   39.27    1.85   0
  -6  -1   0    1.15    1.45   0
  -6   4   3  106.43    2.12   0
  -6   9   4  273.35    2.96   0
  -6  10   4    0.71    1.93   0
  -5  -5  -6   10.50    1.58   0
  -5   7   4  289.91    2.81   0
  -5   8   4  150.72    2.00   0
  -5   9   4  166.80    2.11   0
  -5  10   4   51.28    1.59   0
  -5  11   4    1.31    1.57   0
  -4   3   3  508.85    3.99   0
  -4   7   4    2.87    0.92   0
  -4  11   4    0.94    1.38   0
  -4  12   4    4.45    1.55   0
  -3   7   4  222.60    2.28   0
  -3   8   4   60.86    1.40   0
  -3  10   4    1.35    1.05   0
  -3  11   4   -1.53    1.29   0
  -3  12   4    6.86    1.99   0
  -2   0   1    2.14    1.68   0
  -2   4   3    1.80    0.79   0
  -2   9   4    1.19    1.31   0
  -2  10   4   41.14    1.69   0
  -1  -4  -4  318.91    3.29   0
  -1   5   3  292.04    2.92   0
   0  -5 -12    1.60    1.68   0
   0  -5 -11   63.33    2.20   0
   0  -5  -9  296.74    3.02   0
   0  -5  -8   32.82    1.28   0
   0  -4  -5 1524.85    6.60   0
   0   7   3  152.59    2.21   0
   0   8   3  690.56    4.18   0
   0  11   3   52.51    1.50   0
   0  12   3  113.42    2.20   0
   1  13   2  142.07    2.24   0
   2  -4 -11   97.51    1.92   0
   2  -4 -10  128.96    2.02   0
   2  -3  -6    4.47    1.00   0
   2   5   1  336.18    4.18   0
   3  -3 -12   48.45    1.90   0
   3  -3 -11  105.97    2.00   0
   3  -3 -10   97.81    1.82   0
   3   5   0  260.88    4.74   0
   4  -1  -7   97.04    1.81   0
   4   6  -1  334.37    6.44   0
   5   0 -11  182.97    2.49   0
   5   0 -10   -0.02    1.33   0
   5   1  -7   18.91    1.50   0
   6   3  -8   17.61    1.48   0
   6   5  -6  135.03    3.11   0
  -9   3   1   70.81    2.49   0
  -8  -3  -5   85.17    3.63   0
  -8   6   3    5.53    1.86   0
  -8   7   3   55.16    1.91   0
  -7  -4  -6   31.70    2.35   0
  -6   7   4  300.33    2.69   0
  -6   8   4   11.84    1.34   0
  -5  -3  -2  626.59    8.77   0
  -5   3   3  213.93    2.61   0
  -5   6   4  114.50    1.80   0
  -4  -5  -6    7.74    1.43   0
  -4   1   2  148.34    2.61   0
  -4   6   4   39.10    1.27   0
  -3  -5  -6   38.10    1.73   0
  -3   3   3   50.15    1.46   0
  -3   6   4    0.79    0.86   0
  -3  13   4   93.50    2.11   0
  -2  -5  -6   58.79    1.65   0
  -2   7   4  123.68    1.80   0
  -2   8   4    0.92    0.85   0
  -2  11   4    0.68    1.15   0
  -2  12   4    1.54    1.36   0
  -1  -5 -12   -0.14    2.36   0
  -1  -5  -7   34.20    1.30   0
   0  -5 -10   61.46    1.64   0
   0  -2  -2  197.46    3.44   0
   0   6   3  299.31    3.07   0
   0  13   3   39.12    2.11   0
   1  -4 -12    5.30    2.15   0
   1  -4  -8  343.41    3.10   0
   1  -4  -7   58.58    1.46   0
   1  -2  -3 2707.11   10.23   0
   1   5   2   10.53    0.99   0
   1  14   2   59.73    2.04   0
   2  -3  -7  234.52    2.72   0
   2  -1  -3  718.51    5.48   0
   2   0  -2 3533.19   15.02   0
   3  -2  -7  527.27    3.74   0
   3  -1  -5  368.57    3.55   0
   4  -1 -12   -1.70    2.19   0
   4  -1  -9  312.73    3.11   0
   4  -1  -8   26.04    1.21   0
   4  13  -1   43.72    2.16   0
   5   1  -8   52.63    1.86   0
   5   2  -6   60.16    1.90   0
   6   3 -10    5.62    2.20   0
   6   3  -9   27.02    1.61   0
   6   4  -7  227.05    3.23   0
   6   7  -5   40.12    2.85   0
  -9   5   2   27.82    1.93   0
  -8   3   2  197.33    3.04   0
  -7   2   2   -0.21    1.37   0
  -7   4   3  342.60    3.18   0
  -7   7   4    0.66    1.66   0
  -7   8   4    1.75    1.47   0
  -7   9   4    4.75    1.75   0
  -6   0   1    0.36    1.20   0
  -6   3   3  719.09    4.80   0
  -6   6   4  137.39    2.01   0
  -5  -5  -8   11.28    1.98   0
  -5  -4  -4  133.29    2.86   0
  -5   1   2   62.32    1.79   0
  -5   5   4   82.53    1.86   0
  -4   5   4  161.66    2.13   0
  -3   1   2 2039.47    9.66   0
  -3   5   4  610.68    4.00   0
  -2  -5  -7   21.65    1.23   0
  -2  -4  -4  966.97    6.02   0
  -2   6   4    9.67    0.95   0
  -2  13   4   15.12    1.65   0
  -1  -5 -11   41.34    1.70   0
  -1  -5 -10    0.59    1.18   0
  -1  -5  -9   73.43    1.65   0
  -1  -5  -8    7.01    1.04   0
  -1   2   2 2089.82    9.78   0
  -1   4   3   28.79    1.43   0
  -1   8   4  179.94    2.38   0
  -1   9   4  164.24    2.06   0
  -1  10   4  182.42    2.16   0
  -1  11   4    6.49    1.21   0
  -1  12   4   22.31    1.86   0
   0  -4  -6    8.09    1.09   0
   0   3   2 1699.97    8.57   0
   1  -4 -11   82.22    1.82   0
   1  -4 -10   47.40    1.53   0
   1  -4  -9  302.50    2.77   0
   1  -3  -5    2.68    0.95   0
   1  10   3   35.14    1.53   0
   2  -3 -12  139.24    2.16   0
   2  -3 -11  302.32    3.10   0
   2  -3  -8  140.42    1.99   0
   2  -2  -5 3994.36   10.89   0
   2   8   2  399.04    3.81   0
   2   9   2  339.04    3.29   0
   2  10   2   48.17    1.46   0
   2  11   2   26.55    1.37   0
   2  12   2    1.10    1.63   0
   3  -2 -12   36.84    1.72   0
   3  -2 -11  137.84    2.53   0
   3  -2  -9   60.88    1.84   0
   3  -2  -8  824.59    4.55   0
   3   9   1  140.58    2.66   0
   3  10   1    1.31    1.02   0
   3  11   1  177.40    2.84   0
   4  -1 -11   80.27    1.86   0
   4  -1 -10    0.67    1.18   0
   4   0  -6   57.13    1.57   0
   5   1 -11    3.60    2.13   0
   5   1 -10   18.75    1.91   0
   5   1  -9    7.46    1.55   0
   5   3  -5  125.94    2.74   0
   5   4  -4  274.13    4.55   0
   5   9  -2  119.43    3.94   0
   5  10  -2  120.34    3.51   0
   5  11  -2   47.11    2.88   0
   6   4  -8   14.41    1.91   0
  -9   4   2   -0.02    1.99   0
  -8   5   3  135.59    2.33   0
  -7  -4  -7  130.37    3.08   0
  -7   6   4   73.86    2.07   0
  -6  -4  -5  301.78    4.13   0
  -6   5   4  248.54    2.75   0
  -5  -5  -9   33.49    1.86   0
  -5   9   5   10.03    1.81   0
  -5  10   5    1.10    1.43   0
  -5  11   5    0.43    2.25   0
  -4  -5 -10    0.11    2.00   0
  -4  -5  -9  183.75    2.85   0
  -4  -5  -8   56.90    2.05   0
  -4  -5  -7  436.39    3.83   0
  -4   9   5   38.37    1.39   0
  -4  10   5  432.32    3.19   0
  -4  11   5    1.34    1.45   0
  -4  12   5   62.20    2.29   0
  -3  -5 -11   35.72    1.89   0
  -3  -5 -10   -0.42    1.94   0
  -3  -5  -9   26.20    1.88   0
  -3  -5  -8  989.07    5.54   0
  -3  -5  -7  159.91    2.34   0
  -3  -3  -2  275.29    4.49   0
  -3  10   5   46.73    1.82   0
  -3  11   5   13.65    1.66   0
  -2  -5 -11  143.73    2.29   0
  -2  -5 -10   36.23    1.60   0
  -2  -5  -9   53.64    1.59   0
  -2  -5  -8   29.49    1.32   0
  -2   3   3  187.55    2.52   0
  -1  -4  -5  108.34    2.01   0
  -1  -3  -3  927.29    6.29   0
  -1   7   4  596.24    3.80   0
  -1  13   4   10.76    1.59   0
   0  -4 -12    3.79    1.59   0
   0  -4  -7  214.05    2.56   0
   0  -3  -4   95.96    1.91   0
   0  -1  -1 1168.45   10.78   0
   0   5   3  298.23    3.20   0
   1  -1  -2 1080.38    7.91   0
   1   8   3  124.22    1.99   0
   1   9   3  125.58    2.00   0
   1  11   3    2.26    1.16   0
   1  12   3  141.60    2.18   0
   2  -3 -10    6.74    1.18   0
   2  -3  -9  113.61    1.85   0
   2   7   2   58.39    1.85   0
   2  13   2    0.66    2.07   0
   3  -2 -10  105.31    1.84   0
   3   0  -4   -0.56    1.07   0
   3   8   1    4.52    1.00   0
   3  12   1   35.01    1.64   0
   4   0  -7   -1.52    1.25   0
   4   1  -5    1.93    1.21   0
   5   2  -7  399.62    3.87   0
   5  12  -2   23.81    2.89   0
   6   4 -10   12.22    2.37   0
   6   4  -9    9.78    1.91   0
   6   5  -7   -0.17    1.72   0
   6   6  -6    8.50    1.80   0
  -9   1   0   24.90    2.35   0
  -8  -3  -6   31.75    2.80   0
  -8  -2  -3    0.53    2.72   0
  -8   0   0  439.50    5.88   0
  -8   1   1   44.40    2.10   0
  -8   4   3   10.43    1.73   0
  -8   7   4   20.63    2.42   0
  -7   3   3    8.10    1.50   0
  -6   1   2  131.24    2.49   0
  -6   8   5   58.16    2.10   0
  -6   9   5    0.36    1.46   0
  -6  10   5   39.45    1.90   0
  -5   2   3   70.60    1.94   0
  -5   4   4  263.43    2.67   0
  -5   7   5    2.40    1.50   0
  -5   8   5  117.36    1.86   0
  -4  -4  -4   12.44    1.10   0
  -4  -3  -2   82.28    2.84   0
  -4   2   3  576.53    4.46   0
  -4   4   4   13.08    0.98   0
  -4   7   5    5.42    1.36   0
  -4   8   5  260.96    2.47   0
  -3   4   4   93.15    2.00   0
  -3   8   5   69.44    1.48   0
  -3   9   5  153.08    2.00   0
  -3  12   5   61.59    1.88   0
  -2  -2  -1  388.82    6.90   0
  -2   1   2 1959.06   10.03   0
  -2   5   4 1084.13    5.22   0
  -2   9   5   13.49    1.40   0
  -2  10   5   66.67    1.89   0
  -2  11   5   27.99    1.82   0
  -1  -4 -12    2.74    2.23   0
  -1  -4  -6  649.81    4.39   0
  -1   6   4  224.36    2.45   0
   0  -4 -11    1.95    1.32   0
   0  -4 -10  674.59    4.03   0
   0  -4  -9   -0.20    1.08   0
   0  -4  -8   76.46    1.59   0
   0   9   4  222.73    2.43   0
   0  10   4   83.67    1.74   0
   0  11   4  157.30    2.16   0
   0  12   4   93.75    2.23   0
   1  -3 -13    3.16    1.85   0
   1  -3 -12    1.47    1.89   0
   1  -3  -6  119.76    1.95   0
   1   1   0 1025.29   26.29   0
   1   7   3  108.61    2.14   0
   1  13   3   45.80    1.79   0
   2  -2 -13   -0.07    1.80   0
   2  -2  -6 3548.65    9.93   0
   2   4   1    4.95    1.39   0
   3  -1  -6 1640.12    6.76   0
   3   7   1  217.51    3.41   0
   3  13   1    0.06    1.59   0
   4   0 -12   53.87    1.92   0
   4   0 -11    1.76    1.74   0
   4   0 -10  118.93    2.26   0
   4   0  -9    0.03    1.49   0
   4   0  -8   15.17    1.18   0
   4   9   0  139.58    3.02   0
   4  10   0    0.45    1.57   0
   4  11   0   78.74    2.50   0
   5   2  -8  100.51    2.29   0
   5   8  -2   27.74    3.22   0
  -9   0  -1   20.49    2.85   0
  -9   2   1   45.66    2.43   0
  -8   2   2   33.35    1.88   0
  -8   6   4   78.43    2.53   0
  -7  -3  -4    2.55    1.92   0
  -7   5   4    0.07    1.13   0
  -7   8   5    1.54    2.14   0
  -6  -4  -6  238.13    3.48   0
  -6   2   3  190.64    2.78   0
  -6   4   4  178.59    2.31   0
  -6   7   5   34.82    1.45   0
  -5  -4  -5   47.49    1.97   0
  -5   6   5  114.42    2.05   0
  -4   6   5    1.21    1.23   0
  -3   2   3  651.74    4.78   0
  -3   7   5  134.81    1.82   0
  -2  -4 -12    0.11    2.21   0
  -2  -4  -5   11.32    1.03   0
  -2   8   5    4.68    0.96   0
  -2  12   5   16.82    1.51   0
  -2  13   5   13.12    1.76   0
  -1  -4 -11    0.28    1.39   0
  -1  -4  -7  317.48    3.16   0
   0  -3 -13   14.83    1.80   0
   0   8   4   61.44    1.54   0
   0  13   4  210.68    2.61   0
   1  -3 -11    0.84    1.29   0
   1  -3 -10  256.31    2.76   0
   1  -3  -9  347.63    3.21   0
   1  -3  -8   63.26    1.85   0
   1  -3  -7    4.88    0.96   0
   1  -2  -4    2.85    0.93   0
   1   0  -1 1840.96   14.85   0
   1   4   2  616.71    5.22   0
   2  -2 -12   10.65    1.57   0
   2  -2 -11   23.74    1.94   0
   2  -2  -7  143.33    2.30   0
   2  -1  -4  359.68    3.66   0
   2   6   2  177.74    2.88   0
   3  -1 -12   -0.62    1.55   0
   3  -1 -11   31.99    1.89   0
   3  -1  -8    7.55    1.38   0
   3  -1  -7   91.84    1.80   0
   3   1  -3  115.83    2.75   0
   4   2  -4  142.42    2.90   0
   4   4  -2  982.65   13.61   0
   4  12   0   24.55    1.78   0
   4  13   0    1.32    2.17   0
   5   2 -11   25.46    1.73   0
   5   2 -10  149.95    2.35   0
   5   2  -9    0.09    1.23   0
   5   3  -6    9.76    1.43   0
   6   5 -10   -1.98    2.47   0
   6   5  -9    5.72    2.15   0
   6   5  -8   20.60    1.64   0
   6   8  -5   65.06    3.47   0
  -9   3   2   13.59    2.31   0
  -7   0   1   69.57    2.45   0
  -7   1   2  349.59    4.14   0
  -7   4   4   -0.64    1.44   0
  -7   7   5   51.83    1.75   0
  -6  -4  -9   67.51    2.26   0
  -6  -4  -7   91.49    2.26   0
  -6  -3  -3  140.39    3.71   0
  -6   6   5    0.02    1.11   0
  -4  -4 -11    0.29    2.45   0
  -4   3   4 1187.28    5.85   0
  -4  11   6  112.60    2.37   0
  -3  -4 -11   -0.27    2.21   0
  -3  -4  -5    2.97    0.89   0
  -3   6   5  126.92    1.89   0
  -2  -4 -11   12.00    1.57   0
  -2  -4  -6  134.02    2.27   0
  -2   4   4   37.50    1.31   0
  -2   7   5  223.27    2.37   0
  -1  -4 -10  437.95    3.36   0
  -1  -4  -9  399.96    3.25   0
  -1  -4  -8    1.70    0.95   0
  -1   3   3  224.91    2.88   0
  -1   5   4  343.21    3.09   0
  -1   9   5    6.61    1.05   0
  -1  10   5  177.14    2.12   0
  -1  11   5   12.26    1.32   0
  -1  12   5   54.99    1.73   0
  -1  13   5    1.89    2.29   0
   0  -3 -12   -0.18    1.52   0
   0  -3  -5 2002.54    7.75   0
   0   4   3   16.78    1.40   0
   0   7   4  105.51    1.82   0
   1  -2 -13   -0.16    1.84   0
   1   6   3   14.68    1.08   0
   2  -2 -10  593.02    3.89   0
   2  -2  -9    4.40    1.04   0
   2  -2  -8    2.10    1.07   0
   2  -1 -13   -0.96    2.47   0
   2  11   3   20.47    1.63   0
   3  -1 -10   49.05    1.53   0
   3  -1  -9   71.34    1.68   0
   3   0  -5  594.91    4.57   0
   4   1 -12    0.25    1.64   0
   4   1  -6    0.72    0.85   0
   4   3  -3  502.80    6.22   0
   4   8   0   47.99    2.20   0
   5   6  -3  534.48    9.74   0
   6   6  -7   76.36    2.46   0
   6   7  -6    2.24    1.81   0
  -8  -1  -1  665.56   12.81   0
  -8   3   3    7.79    1.37   0
  -8   5   4   14.60    1.57   0
  -7   6   5   22.93    1.93   0
  -6   3   4   50.87    1.71   0
  -6   5   5  252.67    2.80   0
  -6   9   6   -0.35    2.13   0
  -5  -4 -10    0.09    1.75   0
  -5  -4  -9   36.21    2.13   0
  -5  -4  -8   13.48    1.92   0
  -5  -4  -7  259.70    3.30   0
  -5   3   4    0.68    0.92   0
  -5   5   5  466.53    3.38   0
  -5   8   6   -0.24    1.71   0
  -5   9   6   36.25    1.57   0
  -5  10   6    2.47    1.57   0
  -4  -4 -10   10.51    1.95   0
  -4  -4  -6    0.79    1.37   0
  -4   5   5   44.73    1.34   0
  -4   8   6  222.63    2.58   0
  -4   9   6   93.56    1.82   0
  -4  10   6   36.80    1.62   0
  -3  -4 -10    2.97    1.73   0
  -3  -4  -6    6.92    1.38   0
  -3   3   4   68.79    1.80   0
  -3   5   5   72.60    1.69   0
  -3   9   6   42.11    1.80   0
  -3  10   6  111.07    1.91   0
  -3  11   6   37.74    1.65   0
  -3  12   6   18.42    1.82   0
  -2  -4 -10    1.54    1.27   0
  -2  -4  -9    0.04    1.10   0
  -2  -4  -8  102.26    2.08   0
  -2  -4  -7  247.09    2.73   0
  -2  -3  -3    4.75    0.96   0
  -2   2   3  365.24    3.73   0
  -2   6   5   98.07    1.71   0
  -1  -3 -12    0.90    2.09   0
  -1  -3  -4  475.12    4.19   0
  -1   8   5  533.33    3.54   0
   0  -3 -11    0.14    1.29   0
   0  -3 -10    5.31    1.53   0
   0  -3  -6  538.21    3.91   0
   0  -2  -3 1054.69    6.78   0
   0   1   1 1138.37   10.75   0
   0   6   4 1099.50    5.56   0
   1  -2 -12    5.42    1.44   0
   1  -2  -5  820.17    5.10   0
   1   9   4   63.47    1.84   0
   1  10   4    0.55    1.00   0
   1  11   4  122.08    2.06   0
   1  12   4    1.19    1.38   0
   1  13   4   51.99    2.24   0
   2  -1 -12    8.85    2.03   0
   2   9   3    4.23    1.06   0
   2  10   3    0.09    1.03   0
   2  12   3   30.63    1.58   0
   2  13   3    0.64    2.18   0
   3   0 -12    1.58    1.54   0
   3   2  -2   10.51    1.77   0
   3   6   1  163.60    3.31   0
   3  10   2  584.39    4.83   0
   3  11   2    8.35    1.75   0
   3  12   2  187.66    3.09   0
   4   1 -11   71.41    1.85   0
   4   1 -10   -1.41    1.53   0
   4   1  -9  315.88    3.22   0
   4   1  -8   24.59    1.54   0
   4   1  -7   98.19    1.87   0
   5   3 -11   10.34    1.65   0
   5   3 -10   70.74    2.19   0
   5   3  -9    9.76    1.74   0
   5   3  -8   79.89    2.23   0
   5   3  -7  245.15    3.06   0
   5   4  -5   27.84    1.51   0
   6   6  -9    5.11    2.13   0
   6   6  -8    3.40    1.51   0
  -9   4   3   14.56    1.82   0
  -7  -3  -5    0.98    1.80   0
  -7  -1   0  100.56    3.91   0
  -7   2   3  656.34    4.91   0
  -6   8   6    9.19    1.48   0
  -5   0   2    0.39    1.04   0
  -5   7   6   56.27    1.88   0
  -4  -4  -9  154.11    2.38   0
  -4  -4  -8  276.09    3.11   0
  -4  -4  -7   56.48    1.62   0
  -4   0   2 4059.37   15.14   0
  -4   7   6  129.62    2.20   0
  -3  -4  -9   85.29    1.85   0
  -3  -4  -8   30.06    1.39   0
  -3  -4  -7  168.77    2.37   0
  -3   8   6  149.74    2.00   0
  -2  -3 -12   -0.28    2.26   0
  -2   9   6  255.02    2.68   0
  -2  10   6   64.52    1.63   0
  -2  11   6  113.64    1.93   0
  -2  12   6    0.38    1.58   0
  -1  -3 -11  104.61    2.32   0
  -1  -2  -2 1544.73    9.78   0
  -1   7   5  248.86    2.56   0
   0  -3  -9  371.47    3.11   0
   0  -3  -8   10.60    1.08   0
   0  -3  -7   39.45    1.37   0
   0  -2 -13   44.07    2.04   0
   0   9   5  202.34    2.51   0
   0  10   5   30.50    1.35   0
   0  11   5   -0.54    1.25   0
   0  12   5    0.36    1.44   0
   0  13   5    0.69    2.25   0
   1  -2 -11  178.48    2.21   0
   1   2   1   32.23    2.51   0
   1   5   3  656.60    4.85   0
   1   8   4  201.78    2.63   0
   2  -1 -11  608.32    4.04   0
   2  -1  -5  123.69    2.12   0
   2   0  -3   -0.19    1.49   0
   2   8   3  120.38    2.09   0
   3   0 -11   41.67    1.60   0
   3   0 -10    0.46    1.58   0
   3   0  -6    0.53    0.93   0
   3   9   2   31.95    1.45   0
   3  13   2    0.93    1.64   0
   4   2 -12   29.27    2.19   0
   4   2  -5  131.10    2.56   0
   5   5  -4   90.94    2.87   0
   6   7  -7    2.57    2.05   0
   6   9  -5    0.13    2.42   0
  -8   4   4  181.09    2.62   0
  -8   6   5  102.69    2.26   0
  -7  -3  -8    1.52    2.51   0
  -7  -3  -7   13.45    2.40   0
  -7  -3  -6  268.38    4.00   0
  -7   3   4  228.85    3.03   0
  -7   5   5  130.38    2.15   0
  -7   8   6   10.75    1.76   0
  -6   4   5  128.59    2.23   0
  -6   7   6   -0.15    1.28   0
  -5  -3  -3  537.55    6.20   0
  -5   1   3    3.53    0.92   0
  -5   4   5   24.93    1.24   0
  -5   6   6  136.76    2.15   0
  -4   1   3  178.50    2.71   0
  -4   4   5   74.62    1.58   0
  -3  -3 -12    8.50    1.89   0
  -3   7   6   -0.75    1.00   0
  -2  -3 -11   48.92    2.16   0
  -2   3   4  458.12    3.78   0
  -2   5   5  122.03    1.88   0
  -2   8   6  120.70    1.83   0
  -1  -3 -10  139.97    2.03   0
  -1  -3  -5   89.90    1.89   0
  -1   4   4   83.38    1.72   0
  -1   6   5 1523.09    6.17   0
  -1  11   6   20.69    1.73   0
  -1  12   6   18.79    2.05   0
   0  -2 -12   35.59    1.67   0
   0   2   2  207.28    3.55   0
   0   8   5  304.41    2.99   0
   1  -2 -10   46.20    1.48   0
   1  -2  -9   69.27    1.54   0
   1  -2  -8  203.91    2.65   0
   1  -2  -7   29.04    1.29   0
   1  -2  -6  445.24    3.64   0
   1  -1 -13    2.10    1.71   0
   1  -1  -3 4088.22   13.50   0
   2  -1 -10    3.22    1.19   0
   2  -1  -9   94.89    2.03   0
   2  -1  -7  144.22    2.32   0
   2   0 -13   -0.35    1.77   0
   2   5   2  805.46    6.04   0
   3   0  -8   -0.93    0.98   0
   3   0  -7  603.72    4.17   0
   3   1 -12    0.20    2.09   0
   3   8   2  337.68    3.88   0
   4   2 -11   16.35    1.54   0
   4   7   0  189.28    4.08   0
   4  11   1  178.82    3.21   0
   4  12   1    4.58    1.90   0
   5   4 -11   26.40    1.91   0
   5   4 -10  201.40    3.07   0
   5   4  -6  153.22    2.72   0
   6   7  -8   12.55    2.19   0
   6   8  -6   14.27    2.22   0
  -9   1   1   31.77    2.47   0
  -9   2   2   -0.37    2.12   0
  -9   3   3    8.64    2.08   0
  -8   1   2   81.38    2.47   0
  -8   2   3   50.93    2.09   0
  -8   5   5  464.95    4.05   0
  -7  -2  -2   38.26    3.35   0
  -7   7   6   10.41    1.63   0
  -6  -3  -4  215.63    3.80   0
  -6   0   2    1.72    1.34   0
  -6   1   3  619.05    5.16   0
  -6   6   6   10.62    1.24   0
  -5  -1   1   59.72    2.77   0
  -5   2   4   18.28    1.39   0
  -5   9   7   34.93    2.21   0
  -5  10   7   16.30    1.79   0
  -4  -3 -11    2.73    1.76   0
  -4  -3  -3  615.23    6.15   0
  -4  -1   1  769.12    9.09   0
  -4   2   4  137.62    2.40   0
  -4   6   6  372.96    2.97   0
  -4   9   7  180.35    2.48   0
  -4  10   7    7.19    1.60   0
  -4  11   7   -1.26    1.77   0
  -3  -3 -11   43.72    1.78   0
  -3   0   2    0.01    1.32   0
  -3   1   3  111.19    2.40   0
  -3   6   6    8.04    1.32   0
  -3  11   7    0.23    2.11   0
  -2  -3 -10   27.20    1.82   0
  -2  -3  -4  154.22    2.60   0
  -2   7   6    1.24    0.96   0
  -1  -3  -9   95.67    1.89   0
  -1  -3  -8  372.86    3.15   0
  -1  -3  -7    8.63    1.03   0
  -1  -3  -6    2.32    0.97   0
  -1  -2 -12    0.16    2.09   0
  -1   1   2 1061.98    7.93   0
  -1   9   6  108.59    1.80   0
  -1  10   6  225.56    2.43   0
   0  -2 -11    2.88    1.19   0
   0  -2  -4  152.04    2.51   0
   0  -1 -13   14.15    2.40   0
   0   5   4  146.49    2.17   0
   1  -1 -12   -0.99    1.41   0
   1   3   2 2202.08   10.83   0
   1   7   4   91.03    1.81   0
   2  -1  -8   16.60    1.17   0
   2   0 -12   -0.16    1.40   0
   2   7   3 1740.61    7.65   0
   3   1 -11   26.32    1.98   0
   3   1  -4  152.85    2.68   0
   3   4   0  603.57    9.63   0
   4   2 -10   31.87    1.46   0
   4   2  -9   18.63    1.64   0
   4   2  -7  801.30    5.17   0
   4   2  -6  130.84    2.26   0
   4   3 -12   -0.05    2.18   0
   4  10   1   65.76    2.38   0
   5   4  -9   11.04    1.42   0
   5   4  -8   48.91    1.97   0
   5   4  -7  276.79    3.32   0
   5  11  -1  272.95    5.01   0
   5  12  -1    1.37    2.41   0
   6   8  -7    0.02    2.24   0
  -9   4   4    0.09    2.17   0
  -8  -2  -4   44.43    2.76   0
  -8   3   4  288.04    3.45   0
  -7   4   5   63.60    1.71   0
  -7   6   6    2.87    1.43   0
  -6  -3  -9    1.49    1.74   0
  -6  -3  -8   -0.03    2.06   0
  -6  -3  -5    0.16    1.57   0
  -6   2   4  323.49    3.29   0
  -6   5   6  144.87    2.32   0
  -6   8   7    0.17    2.12   0
  -6   9   7    0.02    1.75   0
  -5  -3 -10    6.24    1.73   0
  -5   5   6  135.98    1.98   0
  -5   8   7  187.23    2.36   0
  -4  -3 -10    3.00    1.86   0
  -4   5   6    1.36    1.35   0
  -4   8   7    3.03    1.27   0
  -3  -3 -10   35.41    1.60   0
  -3   2   4  538.01    4.33   0
  -3   9   7   34.29    1.48   0
  -3  10   7   29.51    1.58   0
  -2  -3  -9  464.53    3.48   0
  -2  -3  -5   25.01    1.50   0
  -2  -2 -12   56.40    2.42   0
  -2   4   5  338.02    3.17   0
  -2  11   7   84.33    2.41   0
  -1   0   1 1826.98   15.07   0
  -1   2   3 2728.17   10.33   0
  -1   5   5   67.83    1.90   0
  -1   8   6  523.39    3.55   0
   0  -2 -10  110.16    1.86   0
   0   3   3  522.82    4.55   0
   0   7   5  130.52    2.01   0
   1  -1 -11   67.59    1.70   0
   1   0 -13    0.10    1.74   0
   1  10   5   63.09    1.66   0
   1  11   5   97.62    1.95   0
   1  12   5  179.39    2.50   0
   1  13   5   -1.18    1.78   0
   2   0 -11   -0.03    1.19   0
   2   1 -13   -1.47    1.84   0
   2  10   4   48.28    1.58   0
   2  11   4  119.69    2.18   0
   2  12   4   10.33    1.50   0
   2  13   4    0.61    1.76   0
   3   1 -10   44.43    1.88   0
   3   7   2   86.55    2.28   0
   3  12   3   -0.31    1.84   0
   4   2  -8   17.95    1.30   0
   4   3 -11   12.87    2.09   0
   4   3  -4 1221.00    8.13   0
   4   9   1   49.73    2.15   0
   5   5  -5  468.34    5.25   0
   5  10  -1   51.16    2.81   0
   6   8  -8   -0.18    2.25   0
   6   9  -6   -0.43    2.59   0
   6  10  -5   47.82    3.67   0
  -9  -1  -3   27.10    3.75   0
  -8  -2  -5    5.15    2.25   0
  -8   0   1   -0.12    1.70   0
  -8   6   6   45.30    2.40   0
  -7   1   3   16.02    1.71   0
  -6  -3  -6  243.12    3.42   0
  -6   3   5    0.61    1.32   0
  -6   7   7    0.46    1.97   0
  -5  -3  -9   51.52    1.86   0
  -5  -3  -8   70.53    2.28   0
  -5  -3  -4   70.78    2.25   0
  -5   3   5  131.22    2.08   0
  -5   7   7    1.68    1.26   0
  -4  -3  -9   -0.23    1.28   0
  -4   3   5    2.19    0.90   0
  -4   7   7  220.40    2.41   0
  -3  -3  -9    0.51    1.15   0
  -3  -2 -12   39.61    2.04   0
  -3  -2  -1 1759.93   15.84   0
  -3   5   6   55.36    1.53   0
  -3   8   7   18.62    1.29   0
  -2  -3  -8  202.89    2.46   0
  -2  -3  -7   36.83    1.42   0
  -2  -3  -6  549.98    4.16   0
  -2   6   6   23.93    1.15   0
  -2   9   7   16.28    1.73   0
  -2  10   7  218.22    2.42   0
  -1  -2 -11    2.69    1.32   0
  -1  -1 -13    5.12    1.83   0
  -1   3   4   58.07    1.86   0
  -1   7   6  588.64    3.67   0
   0  -2  -9    0.88    0.91   0
   0  -2  -8  290.53    2.84   0
   0  -2  -7   46.68    1.72   0
   0  -2  -6   14.36    1.40   0
   0  -2  -5  293.33    3.25   0
   0  -1 -12    5.96    1.49   0
   0   6   5  113.33    2.15   0
   0  10   6   87.95    1.82   0
   0  11   6    1.53    1.34   0
   0  12   6    0.37    1.54   0
   1  -1 -10  347.17    3.00   0
   1  -1  -4    2.64    0.97   0
   1   0 -12   -0.03    1.90   0
   1   4   3   82.93    2.20   0
   1   6   4   57.70    1.60   0
   1   9   5  421.95    3.38   0
   2   0 -10  450.30    3.41   0
   2   0  -4  379.68    3.96   0
   2   1 -12    9.95    2.04   0
   2   6   3   96.99    2.36   0
   2   9   4  101.54    1.95   0
   3   1  -9   70.75    1.65   0
   3   1  -5  340.11    3.59   0
   3   2 -12   38.18    1.76   0
   3  10   3  187.94    2.98   0
   3  11   3  164.54    2.63   0
   3  13   3    0.83    1.77   0
   4   3 -10   20.54    1.92   0
   5   5 -10   12.21    1.68   0
   5   5  -9    3.63    1.89   0
  -8  -2  -6  150.07    3.20   0
  -8   4   5   92.78    2.21   0
  -7   0   2   -0.16    1.31   0
  -7   2   4   85.40    1.98   0
  -7   3   5  277.67    3.22   0
  -7   5   6   -0.03    1.36   0
  -7   7   7   60.24    2.08   0
  -5  -3  -7    0.72    1.51   0
  -5  -3  -5  149.37    2.84   0
  -5   4   6  164.48    2.47   0
  -5   6   7  357.07    3.24   0
  -4  -3  -8   76.92    1.82   0
  -4  -3  -7  216.43    2.86   0
  -4  -2 -11    6.08    2.32   0
  -4   4   6  328.73    3.11   0
  -4   6   7   70.11    1.82   0
  -4  10   8   17.31    2.43   0
  -3  -3  -8  288.67    2.93   0
  -3  -3  -7  207.27    2.63   0
  -3  -3  -6  238.94    3.04   0
  -3  -3  -5  357.97    3.67   0
  -3  -2 -11   33.17    2.25   0
  -3   3   5   81.19    1.71   0
  -3   7   7   69.36    1.58   0
  -2  -2 -11    0.66    1.34   0
  -2   1   3  698.71    5.58   0
  -2   8   7  175.90    2.20   0
  -1  -2 -10   69.90    1.60   0
  -1  -2  -3 2336.66   10.46   0
  -1  -1 -12   82.44    2.30   0
  -1  10   7    2.96    1.78   0
  -1  11   7  128.76    2.14   0
  -1  12   7   32.83    1.91   0
   0  -1 -11  121.52    2.01   0
   0  -1  -2   79.02    2.94   0
   0   0 -13   -0.94    1.67   0
   0   4   4  255.19    2.89   0
   0   9   6   19.51    1.21   0
   1  -1  -9  246.98    2.55   0
   1  -1  -8  498.37    3.71   0
   1  -1  -5   77.27    2.00   0
   1   1 -13    1.69    2.32   0
   1   8   5   81.18    1.72   0
   2   0  -9   -0.04    1.00   0
   2   0  -8   11.59    1.50   0
   2   0  -5   -0.31    1.11   0
   2   2 -13    0.92    2.19   0
   2   8   4   92.14    1.94   0
   3   1  -7   92.04    1.86   0
   3   1  -6 1656.86    7.31   0
   3   2 -11  135.39    2.20   0
   3   5   1   96.08    2.86   0
   3   9   3  420.77    4.14   0
   4   3  -9  130.47    2.40   0
   4   3  -5    3.43    1.32   0
   4   4 -11  223.95    3.20   0
   5   5  -8  148.56    2.53   0
   5   5  -7   91.12    2.35   0
   5   5  -6  126.34    2.60   0
   5   6 -10   52.70    2.59   0
  -9   0   0   -0.01    2.55   0
  -9   2   3   50.51    2.45   0
  -9   3   4   59.43    2.54   0
  -8   5   6    0.47    2.25   0
  -7   6   7    2.07    2.03   0
  -6  -1   1  359.87    6.22   0
  -6   4   6  131.86    2.05   0
  -6   6   7   70.66    1.73   0
  -5   8   8  271.53    3.13   0
  -5   9   8   31.83    1.95   0
  -4  -3  -6   90.98    1.96   0
  -4   9   8   19.58    1.63   0
  -3  -1   1  367.61    7.21   0
  -3   4   6   -0.36    1.26   0
  -3   6   7   29.03    1.56   0
  -3   9   8   13.36    1.81   0
  -3  10   8   -0.31    1.58   0
  -2  -2 -10   17.94    1.38   0
  -2  -1 -12   21.19    2.27   0
  -2   2   4  196.37    2.65   0
  -2   5   6   12.19    1.00   0
  -2   7   7    2.73    1.01   0
  -1  -2  -9  354.13    3.05   0
  -1  -2  -8    1.16    1.34   0
  -1   0 -13    5.55    2.47   0
  -1   4   5  850.86    4.84   0
  -1   6   6  263.94    2.66   0
  -1   9   7  214.98    2.39   0
   0  -1 -10    5.17    1.47   0
   0   0 -12   87.04    2.30   0
   0   8   6  101.24    1.84   0
   1  -1  -7   72.99    1.72   0
   1  -1  -6    4.04    0.92   0
   1   0 -11  101.28    1.84   0
   1   5   4   14.98    1.41   0
   1   7   5  475.98    3.84   0
   1  12   6   22.92    2.24   0
   2   0  -7    0.40    0.93   0
   2   0  -6  849.34    5.11   0
   2   1 -11  599.02    3.85   0
   2   1  -2 2066.26   12.92   0
   2   3   1    5.99    1.70   0
   2   4   2  266.16    3.99   0
   2  12   5  199.91    3.01   0
   3   2 -10  106.04    1.98   0
   3   2  -3  674.31    6.49   0
   3   3 -12   48.32    1.95   0
   4   3  -8    2.54    1.07   0
   4   3  -7  570.50    4.58   0
   4   3  -6   -0.16    1.44   0
   4   8   1  161.49    3.42   0
   4  11   2  178.79    3.17   0
   4  12   2   16.22    2.30   0
   5   6  -9    8.24    2.13   0
   5   6  -4  122.08    3.35   0
   5   9  -1  202.46    5.70   0
  -9   1   2  131.94    3.65   0
  -8   2   4   85.32    2.54   0
  -8   3   5    2.70    1.81   0
  -7  -2  -7   -0.23    2.14   0
  -7   4   6   13.24    1.41   0
  -6  -2  -9   -0.18    1.68   0
  -6   5   7    2.96    1.74   0
  -6   8   8    0.11    1.76   0
  -5  -2 -10   22.43    1.79   0
  -5   1   4   70.87    1.79   0
  -5   2   5  124.50    2.07   0
  -5   5   7   92.91    1.84   0
  -5   7   8   51.03    1.96   0
  -4  -2 -10  163.86    2.41   0
  -4   1   4  178.29    2.73   0
  -4   2   5  131.82    2.30   0
  -4   5   7  740.66    4.35   0
  -4   8   8  234.88    2.48   0
  -3  -2 -10   22.88    1.46   0
  -3  -1 -12  203.07    2.67   0
  -3   8   8   11.39    1.76   0
  -2  -2  -9   13.86    1.22   0
  -2   0   2 3369.20   15.05   0
  -2   3   5  550.69    3.99   0
  -2  10   8    0.62    1.49   0
  -2  11   8    0.55    1.77   0
  -1  -2  -7   11.24    1.13   0
  -1  -2  -6    3.41    1.23   0
  -1  -2  -5 1905.05    8.07   0
  -1  -2  -4  128.14    2.40   0
  -1  -1 -11    8.27    1.34   0
  -1   8   7  210.91    2.33   0
   0  -1  -9   31.16    1.57   0
   0   1 -13   16.41    2.42   0
   0   5   5  729.21    4.53   0
   0   7   6    3.88    0.97   0
   0  11   7    0.19    1.53   0
   0  12   7    5.49    1.78   0
   1   0 -10    0.53    1.09   0
   1   0  -2    0.26    1.97   0
   1   1 -12    0.28    1.39   0
   1  10   6   68.30    1.70   0
   1  11   6   78.85    1.87   0
   2   1 -10    1.36    1.15   0
   2   2 -12   18.00    1.61   0
   2   7   4   55.24    1.68   0
   2  10   5  358.33    3.57   0
   2  11   5   27.34    1.63   0
   3   2  -9   60.35    1.65   0
   3   3 -11   92.55    2.35   0
   3   6   2  526.20    5.30   0
   3   8   3  273.61    3.34   0
   3  12   4    2.17    1.98   0
   4   4 -10  175.57    2.52   0
   4   4  -3  387.93    5.65   0
   4   5 -11   97.86    2.72   0
   4  10   2   67.85    2.28   0
   5   6  -8    0.06    1.83   0
   5  12   0    9.04    2.89   0
  -8   1   3  155.27    2.91   0
  -8   4   6   13.74    2.30   0
  -7  -2  -6    2.14    2.00   0
  -7  -2  -3    0.11    1.60   0
  -7   5   7   28.63    2.16   0
  -6  -2  -8   -0.21    2.04   0
  -6   1   4    0.40    0.92   0
  -6   2   5   79.75    1.87   0
  -6   3   6   88.67    2.17   0
  -6   7   8   11.21    1.62   0
  -5  -2  -9    1.40    1.44   0
  -5   0   3  143.76    2.69   0
  -5   3   6    8.01    1.06   0
  -4  -2  -9  130.92    2.38   0
  -4   0   3   -0.41    1.20   0
  -4   3   6    0.49    1.34   0
  -4   7   8   59.63    1.68   0
  -3  -2  -9    7.74    1.20   0
  -3   5   7  529.52    3.49   0
  -3   7   8   25.95    1.61   0
  -2  -2  -8  656.73    4.21   0
  -2  -1 -11   51.12    1.73   0
  -2   4   6  389.60    3.19   0
  -2   6   7   17.77    1.05   0
  -2   9   8   96.58    1.88   0
  -1  -1 -10  276.26    2.72   0
  -1   0 -12   -0.28    1.47   0
  -1   5   6 1239.05    5.50   0
  -1   7   7   64.05    1.52   0
  -1  11   8    1.25    2.22   0
   0  -1  -8    3.39    1.26   0
   0   0 -11   -0.15    1.25   0
   0   9   7   22.59    1.75   0
   0  10   7    5.86    1.31   0
   1   0  -9  157.65    2.12   0
   1   1 -11   73.79    2.11   0
   1   2 -13    0.28    1.79   0
   1   6   5  137.53    2.21   0
   1   9   6   64.76    1.67   0
   2   1  -9   88.58    1.73   0
   2   2 -11   29.08    1.96   0
   2   5   3 1497.36    7.87   0
   2   9   5   25.31    1.77   0
   3   2  -8  844.70    4.92   0
   3   2  -4  595.06    5.42   0
   3   4 -12   15.14    1.76   0
   3  10   4    1.05    1.58   0
   3  11   4    2.94    1.41   0
   4   4  -9   15.34    1.39   0
   5   6  -7  378.99    4.20   0
   5   6  -6  142.24    2.94   0
   5   6  -5  113.26    2.83   0
   5   7  -9   47.34    2.58   0
   5  11   0    0.12    2.39   0
  -7  -2  -5    3.74    1.38   0
  -7  -2  -4   85.52    2.70   0
  -7   1   4  869.80    6.28   0
  -7   2   5  101.52    2.13   0
  -7   3   6    1.83    1.75   0
  -6  -2  -7   43.59    2.21   0
  -6   0   3    0.17    1.30   0
  -6   4   7  230.20    2.89   0
  -6   6   8    1.46    1.49   0
  -5  -2  -8   63.45    2.14   0
  -5  -2  -1   83.38    4.15   0
  -5   4   7  273.29    2.72   0
  -5   6   8   -0.43    1.31   0
  -4  -2  -8   80.24    2.09   0
  -4  -2  -1   67.07    3.46   0
  -4  -1 -11    8.67    1.70   0
  -4   4   7   94.48    2.02   0
  -4   6   8  236.00    2.44   0
  -4   9   9   14.75    1.89   0
  -3  -2  -8    3.48    1.10   0
  -3  -1 -11  128.21    2.21   0
  -3   1   4  147.27    2.44   0
  -3   2   5 1076.01    5.70   0
  -3   3   6 1575.44    6.60   0
  -2  -2  -7  313.15    3.09   0
  -2  -2  -3  391.33    4.61   0
  -2  -1 -10   35.15    1.84   0
  -2   0 -12    1.47    1.63   0
  -2   8   8    6.79    1.22   0
  -1  -1  -9   29.01    1.65   0
  -1   1 -13    3.33    1.85   0
  -1   2   4    5.91    1.38   0
  -1   9   8   86.42    2.11   0
  -1  10   8    7.76    1.57   0
   0  -1  -7  376.00    3.31   0
   0  -1  -3 1401.97    8.37   0
   0   0 -10  147.42    2.39   0
   0   1 -12    4.35    1.50   0
   0   2   3 1037.92    6.79   0
   0   3   4   88.25    1.94   0
   0   6   6  227.11    2.57   0
   0   8   7   -0.19    1.51   0
   1   0  -8   -1.14    0.94   0
   1   2 -12    5.92    2.05   0
   1   8   6  137.82    2.14   0
   2   1  -8   16.79    1.19   0
   2   3 -12  133.72    2.27   0
   2   6   4 1396.25    7.08   0
   2   8   5  424.04    3.83   0
   3   2  -7  538.51    4.13   0
   3   2  -6   51.16    1.90   0
   3   2  -5 1160.76    6.87   0
   3   3 -10   98.70    1.98   0
   3   7   3   57.00    2.12   0
   4   4  -8  122.04    2.20   0
   4   5 -10   40.62    1.84   0
   4   6 -11   -0.03    2.54   0
   4   6   0  465.52    8.00   0
   4   9   2  220.34    3.56   0
   5   7  -3  101.43    4.00   0
  -9   2   4   50.62    2.57   0
  -9   3   5    5.79    2.58   0
  -8   0   2    1.00    1.99   0
  -7   4   7   19.11    2.00   0
  -7   6   8    8.63    1.80   0
  -6  -2  -2  349.57    6.19   0
  -5  -2  -7  549.39    4.57   0
  -5  -1 -10    1.74    2.09   0
  -5   8   9    0.13    1.80   0
  -4  -1 -10    2.17    1.94   0
  -4   8   9   31.48    1.78   0
  -3  -2  -7   -1.72    1.41   0
  -3  -1 -10   60.48    1.95   0
  -3   0 -12   -0.72    1.80   0
  -3   0   3 2491.11   11.12   0
  -3   4   7   24.76    1.58   0
  -3   6   8   66.75    1.57   0
  -3   9   9  138.61    2.26   0
  -2  -2  -6    0.76    0.92   0
  -2  -2  -5  170.17    2.68   0
  -2  -2  -4 2389.62    9.97   0
  -2   5   7   20.03    1.08   0
  -2   7   8   52.98    1.52   0
  -2  10   9    2.43    2.35   0
  -1   0 -11  216.80    2.45   0
  -1   1   3 4217.03   13.97   0
  -1   3   5    2.00    0.92   0
  -1   6   7   51.03    1.41   0
  -1   8   8   35.72    1.75   0
   0  -1  -6  497.81    3.95   0
   0  -1  -5 2463.77    9.17   0
   0  -1  -4  141.43    2.57   0
   0   2 -13   43.88    2.10   0
   0   4   5 1484.13    6.60   0
   0  11   8   57.02    2.31   0
   1   0  -7  350.81    3.18   0
   1   1 -10  354.58    3.02   0
   1   3 -13    1.14    1.88   0
   1   3   3  903.64    6.33   0
   1   4   4  337.37    3.59   0
   1  11   7   10.57    1.64   0
   1  12   7   54.65    2.14   0
   2   1  -7  143.87    2.17   0
   2   1  -3  744.38    6.50   0
   2   2 -10  586.43    3.92   0
   2  11   6   40.39    2.34   0
   2  12   6   24.01    1.91   0
   3   3  -9    0.69    1.10   0
   3   4 -11  354.60    3.24   0
   3   5 -12    1.12    1.86   0
   3   9   4  161.88    2.55   0
   4   4  -7   99.40    2.11   0
   4   4  -6  352.22    3.90   0
   4   4  -5   78.43    2.23   0
   4   4  -4   13.18    1.56   0
   4   5  -9   23.95    1.87   0
   4   7   1  734.09    7.57   0
   4  12   3    0.33    2.32   0
   5   7  -8   52.50    1.96   0
   5   8  -9    1.10    2.55   0
   5  10   0   32.33    2.74   0
  -8  -1  -6   62.34    2.90   0
  -8   2   5   95.08    2.60   0
  -8   3   6   21.91    2.29   0
  -7  -1  -8  125.06    2.97   0
  -7   0   3 1059.09    7.94   0
  -7   5   8  150.27    2.74   0
  -6  -2  -5    6.21    1.60   0
  -6  -1  -9   -0.05    1.69   0
  -6   5   8   26.66    1.58   0
  -5   2   6   54.76    1.85   0
  -5   5   8  145.03    2.11   0
  -5   7   9   48.24    1.88   0
  -4  -2  -7    7.33    1.23   0
  -4   5   8  132.26    2.02   0
  -4   7   9   26.02    1.51   0
  -3  -2  -6   38.68    1.75   0
  -3  -2  -2  582.00    6.78   0
  -3   8   9    2.46    1.50   0
  -2  -1  -9 1053.95    5.20   0
  -2   0 -11   -0.18    1.34   0
  -2   1   4  370.01    3.89   0
  -2   2   5 3826.58   10.79   0
  -2   3   6    4.70    0.99   0
  -2   6   8  331.81    3.05   0
  -2   9   9    0.99    1.52   0
  -1  -1  -8  631.11    4.14   0
  -1   0 -10    0.31    1.53   0
  -1   1 -12   96.82    2.02   0
  -1   4   6   57.66    1.52   0
   0   0  -9    1.81    0.93   0
   0   1 -11  126.13    1.99   0
   0   1   2   77.77    3.08   0
   0   2 -12   42.40    2.26   0
   0   5   6  688.64    4.21   0
   0   7   7    8.82    1.08   0
   0  10   8    0.20    1.50   0
   1   0  -6    0.70    0.87   0
   1   0  -5    9.71    1.32   0
   1   0  -4   -0.40    1.46   0
   1   0  -3 9964.90   22.58   0
   1   1  -9  251.40    2.83   0
   1   2 -11  180.80    2.25   0
   1   2   2 1594.49   10.26   0
   1   5   5  139.67    2.42   0
   1   7   6  121.03    1.99   0
   1   9   7   15.50    1.66   0
   1  10   7    3.16    1.39   0
   2   1  -6   29.42    1.40   0
   2   1  -5  137.13    2.53   0
   2   1  -4  378.81    4.12   0
   2   2  -9    7.05    1.43   0
   2   3 -11  294.05    2.94   0
   2   4 -12    0.05    1.68   0
   2   7   5  434.55    3.88   0
   2  10   6    0.04    1.34   0
   3   3  -8  254.16    2.98   0
   3   4 -10    2.53    1.61   0
   3   8   4  499.71    4.46   0
   3  12   5    3.75    2.41   0
   4   6 -10   32.43    1.84   0
   4  11   3   80.59    2.30   0
   5   7  -7    2.02    1.38   0
   5   7  -6   58.62    2.33   0
  -9   1   3    1.67    2.20   0
  -8  -1  -1  635.27   13.36   0
  -8   1   4   76.15    2.60   0
  -8   4   7    0.02    1.78   0
  -7  -1   1    5.97    1.94   0
  -6  -2  -4   10.10    1.53   0
  -6  -2  -3  135.49    3.25   0
  -6   1   5    0.11    1.41   0
  -6   2   6  152.11    2.33   0
  -6   3   7  444.89    3.57   0
  -6   6   9    6.12    2.34   0
  -5  -2  -6   89.08    2.07   0
  -5  -1  -9    6.36    1.50   0
  -5  -1   2   64.07    2.57   0
  -5   1   5   31.47    1.47   0
  -5   3   7  240.96    2.67   0
  -5   6   9    7.12    1.53   0
  -4  -2  -6  123.65    2.23   0
  -4  -1  -9   76.77    2.06   0
  -4   0 -11   -2.14    1.75   0
  -4   1   5    0.39    0.91   0
  -4   2   6  120.50    2.01   0
  -4   3   7  577.13    4.08   0
  -4   6   9    0.65    1.73   0
  -3  -2  -5  467.19    4.23   0
  -3  -2  -4  322.06    3.91   0
  -3  -1  -9  159.50    2.26   0
  -3   0 -11   29.66    1.67   0
  -3   1 -12  198.87    3.19   0
  -3   5   8   39.44    1.40   0
  -3   7   9    0.88    1.30   0
  -2  -1  -8  235.35    2.84   0
  -2   1 -12   27.89    1.80   0
  -2   4   7   11.60    1.09   0
  -2   8   9  167.80    2.27   0
  -1  -1  -7  101.44    1.87   0
  -1   5   7  129.96    2.01   0
  -1   7   8   -0.11    1.10   0
  -1  10   9    4.56    1.68   0
   0   0  -8    6.21    1.34   0
   0   3 -13   19.31    1.93   0
   0   9   8  316.34    2.98   0
   1   3 -12   -0.92    1.53   0
   2   3 -10    5.85    1.66   0
   2   9   6  488.98    3.88   0
   3   5 -11    0.27    1.55   0
   3  10   5    6.49    1.73   0
   3  11   5    0.45    1.53   0
   4   5  -8  127.93    2.35   0
   4   8   2    1.99    1.11   0
   4  10   3    6.84    1.88   0
   5   7  -5    2.72    1.70   0
   5   7  -4  279.20    4.84   0
   5   8  -8  261.49    3.51   0
   5  12   1    0.06    2.84   0
  -9   0   1   59.77    4.11   0
  -8  -1  -5  411.44    4.75   0
  -7   1   5   88.10    2.37   0
  -7   2   6  120.47    2.26   0
  -7   3   7   43.20    1.75   0
  -6  -1  -8    2.97    1.48   0
  -6   4   8   11.96    1.43   0
  -5  -2  -4   36.97    1.89   0
  -5  -2  -2   18.20    1.77   0
  -5   0   4    0.24    1.34   0
  -5   4   8   47.40    1.59   0
  -4  -2  -5   80.93    1.96   0
  -4  -2  -2 1018.87    9.17   0
  -4  -1   2  150.54    3.72   0
  -4   4   8  123.77    1.97   0
  -4   8  10   48.86    2.06   0
  -3  -1  -8   46.96    1.78   0
  -3   1   5  354.81    3.65   0
  -3   2   6   49.29    1.47   0
  -3   3   7   38.56    1.66   0
  -3   6   9   29.95    1.79   0
  -2   0 -10    5.78    1.21   0
  -2   5   8    4.71    1.39   0
  -2   7   9   17.88    1.85   0
  -1  -1  -6  293.42    3.08   0
  -1   0  -9  717.52    4.23   0
  -1   1 -11   10.95    1.40   0
  -1   2 -12   -0.25    1.57   0
  -1   6   8  144.76    2.35   0
  -1   9   9   -1.34    1.55   0
   0   1 -10    1.60    1.19   0
   0   2 -11    1.87    1.69   0
   0   6   7  216.13    2.43   0
   0   8   8   93.21    1.84   0
   1   1  -8  494.56    3.64   0
   1   2 -10   48.08    1.53   0
   1   6   6   94.46    1.89   0
   1   8   7    0.38    1.14   0
   1  11   8   41.95    2.64   0
   2   2  -8    2.77    1.00   0
   2   4 -11  101.48    2.03   0
   2   4   3 1549.53    8.46   0
   2   5 -12   -0.12    1.70   0
   2   5   4   39.05    1.56   0
   2   8   6    2.25    1.51   0
   3   3  -7   40.87    1.52   0
   3   4  -9   13.88    1.27   0
   3   5 -10   18.14    1.97   0
   3   5   2  283.23    4.19   0
   3   6 -11  245.13    3.39   0
   3   6   3 1157.01    7.23   0
   4   5  -7  724.69    5.07   0
   4   6  -9    2.60    1.40   0
   4   7 -10   36.40    1.94   0
   5   8  -7  199.06    3.40   0
   5   9  -8   34.87    2.83   0
  -9   2   5   14.31    2.68   0
  -8  -1  -4   17.30    2.14   0
  -8   3   7   23.89    2.27   0
  -7  -1  -6   16.73    2.11   0
  -7   4   8   22.14    1.77   0
  -6  -1   2  138.54    3.71   0
  -6   0   4   18.97    1.30   0
  -6   5   9    6.17    1.64   0
  -5  -2  -3 1566.67    9.97   0
  -5  -1  -8  613.18    4.42   0
  -5   0 -10    0.04    1.68   0
  -5   5   9    2.31    1.40   0
  -4  -2  -3  316.76    4.45   0
  -4  -1  -8   79.87    1.88   0
  -4   0 -10    1.09    1.44   0
  -4   0   4  385.63    4.10   0
  -4   5   9   18.94    1.72   0
  -4   7  10   33.77    2.32   0
  -3   0 -10    0.21    1.17   0
  -3   1 -11  129.91    2.56   0
  -3   4   8  360.97    3.02   0
  -3   8  10   53.52    1.92   0
  -2  -1  -7    3.68    1.05   0
  -2   0   3    1.26    1.11   0
  -2   1 -11   53.31    1.68   0
  -2   2 -12   55.27    2.39   0
  -2   9  10    6.19    2.52   0
  -1  -1  -5  226.08    2.87   0
  -1   1 -10  282.71    2.92   0
  -1   2   5  798.22    4.97   0
  -1   3   6  113.79    1.93   0
  -1   4   7   51.63    1.64   0
  -1   8   9   72.68    1.81   0
   0   0  -7    1.49    0.99   0
   0   1  -9   30.09    1.55   0
   0   2   4  155.37    2.79   0
   0   3 -12    0.64    1.52   0
   0   3   5 1912.73    7.69   0
   0   4   6    4.91    1.05   0
   0   7   8  618.45    4.10   0
   0  10   9    0.78    2.25   0
   1   1  -7   81.51    2.01   0
   1   3 -11    0.55    1.31   0
   1   4 -12    6.74    1.66   0
   1   7   7   59.36    1.91   0
   1  10   8  101.78    2.08   0
   2   2  -7  142.11    2.27   0
   2   3  -9  103.43    2.12   0
   2   6   5  111.46    2.09   0
   2  10   7   10.91    1.91   0
   2  11   7   86.58    2.20   0
   3   3  -6 1640.37    7.59   0
   3   3  -2  978.80   10.13   0
   3   4  -8  382.77    3.60   0
   3   7   4  870.03    5.76   0
   3   9   5   34.74    1.56   0
   4   5  -6    2.15    1.38   0
   4   6  -8  233.61    3.17   0
   4   8 -10   44.96    2.78   0
   4   9   3   11.99    1.32   0
   4  12   4   17.33    2.56   0
   5   8  -6    0.45    1.85   0
   5  11   1    4.36    2.23   0
  -8  -1  -3   46.83    2.66   0
  -8  -1  -2    0.22    2.13   0
  -8   0   3    0.07    1.60   0
  -8   2   6   81.51    2.24   0
  -7   0  -8   -0.76    2.52   0
  -6  -1  -7  245.66    3.06   0
  -6   0  -9    0.20    1.69   0
  -6   2   7   59.26    2.10   0
  -6   3   8   19.96    1.80   0
  -5   1   6   17.15    1.45   0
  -5   2   7  397.64    3.40   0
  -5   3   8   80.02    2.09   0
  -5   6  10   48.20    2.46   0
  -4   1 -11    8.24    1.75   0
  -4   2   7  775.91    4.77   0
  -3  -1  -7   54.53    1.77   0
  -3   0   4    0.84    1.14   0
  -3   2 -12   40.57    2.07   0
  -3   5   9    2.68    1.19   0
  -3   7  10   44.40    1.79   0
  -2  -1  -6   34.56    1.66   0
  -2   0  -9   -1.35    1.13   0
  -2   2   6 3338.07    9.68   0
  -2   3   7  225.87    2.52   0
  -2   6   9  300.36    2.77   0
  -2   8  10   16.44    1.67   0
  -1  -1  -4 4748.04   13.87   0
  -1  -1  -3  212.78    3.68   0
  -1  -1  -2  482.92    6.13   0
  -1   0  -8    1.57    1.03   0
  -1   0   2    0.87    1.48   0
  -1   2 -11    3.28    1.35   0
  -1   3 -12    1.13    2.13   0
  -1   5   8   -1.22    1.42   0
  -1   7   9   16.39    1.34   0
   0   0  -6   43.50    1.42   0
   0   2 -10  116.05    2.23   0
   0   5   7   41.87    1.45   0
   0   9   9  308.29    2.99   0
   1   2  -9   68.95    1.60   0
   1   3   4  485.40    4.27   0
   1   4   5  106.03    2.05   0
   1   5   6   54.76    1.81   0
   1   9   8    1.57    1.39   0
   2   3   2  169.87    3.51   0
   2   4 -10  125.38    2.12   0
   2   5 -11   13.05    1.50   0
   2   6 -12   -0.61    1.90   0
   2   7   6   42.03    1.79   0
   2   9   7   71.00    2.15   0
   3   3  -5   84.92    2.07   0
   3   3  -4   78.51    2.36   0
   3   4   1  307.87    5.77   0
   3   5  -9    0.20    1.62   0
   3   6 -10   -0.26    1.97   0
   3   7 -11    0.18    1.86   0
   3   8   5   -0.15    1.50   0
   3  11   6   -1.51    2.32   0
   4   5  -5   44.78    2.00   0
   4   5  -2  990.53   11.38   0
   4   7  -9   28.74    1.71   0
   4  11   4    0.43    1.54   0
   5   8  -5  117.46    3.05   0
   5   9  -7   43.06    2.42   0
   5   9   0   11.25    2.64   0
  -9   1   4    0.42    2.41   0
  -8   1   5    0.41    1.96   0
  -7  -1  -5    8.83    1.87   0
  -7   0   4    0.09    1.14   0
  -7   2   7   47.60    2.29   0
  -7   3   8  122.64    2.78   0
  -6   1   6    3.95    1.08   0
  -6   4   9    7.48    1.60   0
  -5  -1  -7  168.67    2.51   0
  -5   0  -9    4.84    1.50   0
  -5   4   9   12.00    1.39   0
  -4  -1  -7  490.37    3.93   0
  -4   0  -9   -0.25    1.25   0
  -4   1   6   -0.80    0.97   0
  -4   3   8    3.69    1.09   0
  -4   4   9   14.07    1.69   0
  -4   6  10   27.11    1.69   0
  -3  -1   2 2083.11   13.34   0
  -3   0  -9  549.08    3.83   0
  -2   1 -10   42.04    1.46   0
  -2   1   5  118.87    2.16   0
  -2   2 -11   -0.98    1.93   0
  -2   3 -12    0.23    2.34   0
  -2   4   8  122.94    1.89   0
  -2   7  10    0.19    1.90   0
  -1   1  -9   28.36    1.64   0
  -1   1   4    0.44    1.05   0
  -1   9  10   29.40    1.87   0
   0   0  -5    1.25    1.26   0
   0   1  -8    0.79    0.91   0
   0   3 -11    1.00    1.31   0
   0   4 -12    4.81    1.65   0
   0   6   8  229.48    2.52   0
   0   8   9   20.60    2.01   0
   1   1  -6    2.64    0.93   0
   1   3 -10  253.56    2.65   0
   1   4 -11   81.41    1.89   0
   1   5 -12   -0.10    1.82   0
   1   6   7  293.06    3.05   0
   1   8   8  290.45    2.85   0
   2   2  -6 3404.86   10.41   0
   2   3  -8  132.66    2.07   0
   3   3  -3   51.09    1.99   0
   3   4  -7   30.48    1.67   0
   3  10   6   13.33    1.57   0
   4   5  -4  170.11    3.37   0
   4   5  -3  269.37    4.86   0
   4   6  -7   68.57    1.94   0
   4   7  -8   58.66    2.29   0
   4   7   2  155.36    3.40   0
   4   8  -9   24.19    2.40   0
   4   8   3   42.02    2.06   0
   4  10   4   86.67    2.32   0
   5   8  -4  155.80    3.84   0
   5   8  -2   28.84    3.23   0
   5  10   1   18.50    2.28   0
  -8   0  -6  248.28    3.89   0
  -7   1   6    1.13    1.74   0
  -7   4   9   72.42    2.24   0
  -6   0  -8   15.91    1.61   0
  -6   5  10    0.21    1.89   0
  -5  -1  -6  798.97    5.50   0
  -5   0   5 1969.49    8.96   0
  -5   1 -10    0.02    1.70   0
  -5   5  10   13.21    1.69   0
  -4   1 -10    0.31    1.39   0
  -4   2 -11    4.52    2.30   0
  -4   5  10   46.80    2.18   0
  -3  -1  -6  642.46    4.58   0
  -3   1 -10   63.66    1.67   0
  -3   1   6 1628.48    7.20   0
  -3   2 -11   37.60    1.83   0
  -3   2   7  519.37    3.78   0
  -3   3 -12   15.07    1.98   0
  -3   3   8  232.46    2.50   0
  -3   4   9   18.05    1.60   0
  -3   6  10    0.18    1.41   0
  -2  -1  -5   22.17    1.34   0
  -2   0  -8 1376.43    5.91   0
  -2   5   9   50.36    1.46   0
  -1   0  -7   24.10    1.21   0
  -1   2 -10   72.40    2.00   0
  -1   4 -12   -0.15    2.29   0
  -1   6   9    0.82    1.24   0
  -1   8  10    3.38    1.62   0
   0   1   3 1455.94    8.67   0
   0   2  -9   -0.04    1.35   0
   1   1  -5   78.02    2.08   0
   1   2  -8  201.69    2.53   0
   1   2   3 2345.39   10.73   0
   1   6 -12   -1.69    2.30   0
   1  10   9   -0.07    1.83   0
   2   2  -5 3977.26   12.19   0
   2   4  -9    1.54    1.06   0
   2   4   4  977.55    6.31   0
   2   5 -10   51.41    1.86   0
   2   5   5   30.73    1.32   0
   2   6 -11   25.36    1.77   0
   2   8   7   93.96    1.99   0
   3   5  -8   44.67    1.88   0
   3   6   4  244.16    3.56   0
   3   7 -10   42.93    2.22   0
   3   9   6   80.85    2.30   0
   4   6   1  204.50    4.88   0
   4   9   4    4.30    1.66   0
   5   8  -3  514.85    7.54   0
   5   9  -6   32.04    1.94   0
   5  10  -7   19.09    2.08   0
  -9   0   2    0.13    2.51   0
  -8   2   7    0.92    1.72   0
  -7  -1  -4  121.29    2.90   0
  -7  -1   2  369.16    6.65   0
  -7   0  -7   49.37    2.04   0
  -6   0   5    0.42    1.01   0
  -6   1  -9   -0.23    2.34   0
  -5  -1   3    4.74    1.27   0
  -5   0  -8   -0.11    1.30   0
  -5   2   8  107.91    2.25   0
  -5   3   9    6.45    1.72   0
  -4  -1  -6  602.31    4.48   0
  -4  -1   3  187.31    3.63   0
  -4   0  -8  876.50    4.93   0
  -4   0   5    0.38    0.89   0
  -3   0  -8    0.30    1.00   0
  -3   5  10   11.68    1.90   0
  -3   7  11    0.79    1.87   0
  -2  -1   1 3512.50   25.21   0
  -2   1  -9 1035.40    5.13   0
  -2   2   7  139.14    2.30   0
  -2   3   8  137.56    2.29   0
  -2   4 -12   -0.37    2.44   0
  -2   6  10   63.84    1.77   0
  -1   0  -6    2.16    1.25   0
  -1   2   6  442.52    3.71   0
  -1   3 -11  106.02    2.04   0
  -1   3   7    4.12    1.01   0
  -1   4   8  337.11    2.93   0
  -1   7  10  135.87    2.52   0
   0   0  -4 1735.31    8.38   0
   0   1  -7  390.29    3.36   0
   0   2   5  299.56    3.46   0
   0   3 -10    7.31    1.29   0
   0   3   6  516.29    3.85   0
   0   4 -11    0.83    1.41   0
   0   4   7  194.03    2.36   0
   0   5 -12    1.55    1.73   0
   0   5   8   35.17    1.66   0
   0   7   9  187.61    2.35   0
   0   9  10    0.00    1.81   0
   1   3  -9  349.80    3.09   0
   1   4 -10   45.63    1.55   0
   1   4   6  600.47    4.34   0
   1   5 -11   -0.52    1.48   0
   1   7   8   10.00    1.28   0
   1   9   9  143.25    2.39   0
   2   2  -4  219.92    3.40   0
   2   2   0  456.99   18.12   0
   2   3  -7  227.50    2.72   0
   2   6   6    8.99    1.16   0
   2   7 -11   11.14    2.35   0
   2  10   8    5.10    1.73   0
   3   4  -6   -0.71    0.98   0
   3   5   3   10.74    1.23   0
   3   6  -9   27.93    1.57   0
   3   7   5    8.24    1.18   0
   3  11   7   67.69    2.75   0
   4   6  -6  382.35    4.06   0
   4   7  -7  234.45    3.37   0
   4   8  -8  221.45    3.31   0
   4   9  -9   18.94    2.02   0
   4  11   5    0.60    2.31   0
   5   9  -5   16.67    2.16   0
   5  11   2   67.14    3.06   0
  -9   0  -3   37.53    2.77   0
  -9   1   5   15.83    2.38   0
  -8   0  -5    0.01    2.15   0
  -8   0   4  123.73    3.25   0
  -8   1   6   10.84    2.22   0
  -7   0   5  171.06    3.16   0
  -7   2   8  182.49    3.07   0
  -7   3   9   11.27    2.43   0
  -6  -1   3  620.46    6.71   0
  -6   0  -7    0.50    1.84   0
  -6   1   7  322.82    3.61   0
  -6   2   8  478.75    3.80   0
  -6   3   9   21.85    1.59   0
  -6   4  10   12.62    1.83   0
  -5  -1  -5   54.30    1.93   0
  -5   1  -9    6.62    1.47   0
  -5   1   7   19.09    1.28   0
  -5   4  10  199.39    2.59   0
  -4   1  -9   81.64    2.20   0
  -4   1   7  100.66    2.14   0
  -4   2   8   19.33    1.27   0
  -4   3   9  134.72    2.09   0
  -4   4  10  177.53    2.59   0
  -4   6  11    0.38    1.86   0
  -3  -1  -5   66.62    1.77   0
  -3   0   5  598.71    4.85   0
  -3   1  -9  167.34    2.34   0
  -3   2 -10   19.82    1.95   0
  -2  -1  -4  338.61    3.78   0
  -2   0  -7    1.25    0.93   0
  -2   0   4  376.04    4.08   0
  -2   1   6   35.50    1.59   0
  -2   2 -10   19.96    1.34   0
  -2   3 -11   48.83    1.75   0
  -2   4   9    0.65    1.08   0
  -2   7  11    8.46    2.30   0
  -1   1  -8  636.21    4.19   0
  -1   1   5   86.52    2.14   0
  -1   5 -12    0.46    1.80   0
  -1   5   9  101.86    1.87   0
   0   0  -3    1.46    1.80   0
   0   6 -12    1.48    2.28   0
   0   6   9   16.05    1.67   0
   0   8  10  150.19    2.81   0
   1   1  -4    3.73    1.18   0
   1   2  -7   30.39    1.35   0
   1   3   5   85.71    1.95   0
   1   5   7   35.98    1.37   0
   1   6   8   15.27    1.56   0
   1   8   9   70.47    2.26   0
   2   3   3    5.57    1.44   0
   2   4  -8  128.19    2.09   0
   2   5  -9   49.14    1.95   0
   2   6 -10   70.31    2.15   0
   2   7   7    4.70    1.17   0
   2   9   8   19.86    1.63   0
   3   5  -7  568.12    4.43   0
   3   7  -9   -0.84    1.92   0
   3   8 -10   52.29    2.09   0
   3   8   6    0.97    1.22   0
   3  10   7    2.48    2.26   0
   4   6  -5    0.69    1.37   0
   4  10   5   41.89    2.39   0
   5  10  -6    3.75    1.82   0
  -7  -1  -3   62.14    2.37   0
  -7   1   7   71.86    2.38   0
  -6  -1  -4   57.47    2.19   0
  -5   0  -7  891.46    5.42   0
  -5   2 -10   25.63    1.82   0
  -4  -1  -5   39.14    1.49   0
  -4   0  -7    0.13    1.48   0
  -4   2 -10  161.92    2.37   0
  -4   3 -11    3.49    1.81   0
  -4   5  11   94.46    2.70   0
  -3   0  -7  218.81    2.67   0
  -3   2   8  812.29    4.61   0
  -3   3 -11   49.61    1.81   0
  -3   3   9    1.89    1.19   0
  -3   4  10    4.51    1.68   0
  -3   6  11  235.74    2.71   0
  -2  -1  -3  258.09    3.86   0
  -2   1  -8  234.84    2.81   0
  -2   5  10   51.62    1.59   0
  -1   0  -5 3137.25   10.28   0
  -1   0   3 9508.83   22.41   0
  -1   2  -9  351.24    3.05   0
  -1   3 -10  133.99    2.04   0
  -1   4 -11    0.29    1.37   0
  -1   6  10   99.76    1.97   0
  -1   8  11   19.28    1.96   0
   0   1  -6  504.46    4.00   0
   0   2  -8  293.86    2.95   0
   0   3  -9  402.63    3.43   0
   0   4 -10  695.86    4.41   0
   0   5 -11   62.81    1.80   0
   1   3  -8   66.31    1.62   0
   1   4  -9  312.71    3.18   0
   1   5 -10  322.52    3.23   0
   1   6 -11   29.76    1.76   0
   2   2  -3  379.12    4.85   0
   2   3  -6    6.30    1.07   0
   2   5   6   63.31    2.05   0
   2   8   8  131.44    2.30   0
   3   4  -5   27.87    1.36   0
   3   6  -8   64.02    1.72   0
   3   9   7    6.72    1.95   0
   4   7   3    5.27    1.47   0
   4   8   4   29.49    1.92   0
   4   9  -8   17.84    2.14   0
   5   9  -4  173.78    3.84   0
   5   9   1   26.75    2.64   0
   5  10   2   47.82    2.57   0
  -9   0  -2    0.00    2.44   0
  -8   2   8    1.50    1.93   0
  -6   0   6  184.55    3.02   0
  -6   1  -8    3.13    1.52   0
  -6   2  -9   -1.28    2.43   0
  -6   2   9    8.80    1.84   0
  -6   3  10    6.39    2.16   0
  -5  -1   4   68.71    2.23   0
  -5   0   6    1.03    0.96   0
  -5   2   9   -0.52    1.75   0
  -5   3  10   68.07    2.36   0
  -4   0   6   55.24    1.59   0
  -3  -1  -4  428.14    4.31   0
  -3  -1   3  116.88    2.92   0
  -3   1  -8   45.71    1.76   0
  -3   1   7   90.59    1.82   0
  -3   5  11   -2.70    2.14   0
  -2   0  -6   18.46    1.15   0
  -2   2  -9   11.61    1.21   0
  -2   3 -10   31.74    1.88   0
  -2   3   9  102.53    2.17   0
  -2   4 -11   18.66    1.63   0
  -2   6  11   29.31    1.75   0
  -1   1  -7  101.93    1.87   0
  -1   2   7   28.89    1.27   0
  -1   3   8   61.92    1.61   0
  -1   4   9  290.25    2.79   0
  -1   7  11  100.11    2.11   0
   0   0  -2 2661.55   14.24   0
   0   1   4  137.35    2.59   0
   0   3   7   37.04    1.36   0
   0   4   8   73.84    1.61   0
   0   5   9  290.98    3.02   0
   0   7  10   44.94    1.73   0
   1   1  -3 4272.77   15.19   0
   1   1   1  210.04    5.70   0
   1   2  -6  439.74    3.79   0
   1   2   4  127.74    2.40   0
   1   7 -11  104.45    2.24   0
   1   7   9   12.02    1.41   0
   1   9  10   26.74    1.97   0
   2   2  -2  118.67    3.72   0
   2   4  -7    9.68    1.54   0
   2   4   5    9.89    1.19   0
   2   6   7  304.30    3.08   0
   2   7 -10    0.06    1.51   0
   3   4   2   42.88    1.94   0
   3   5   4  994.49    6.63   0
   3   6   5  665.31    4.93   0
   3   7   6  164.24    2.47   0
   3   8  -9    4.73    1.97   0
   4   7  -6  127.27    2.52   0
   4   8  -7    4.65    1.45   0
   4   9   5    4.47    1.41   0
   4  10  -8   23.21    2.70   0
   5  10  -5    2.39    2.04   0
   5  11   3   89.76    3.67   0
  -9   0   3    8.19    2.87   0
  -8   0  -4    0.28    1.88   0
  -8   0   5    0.23    1.95   0
  -8   1   7   55.02    2.67   0
  -7  -1  -2  215.67    4.31   0
  -7  -1   3   16.79    1.89   0
  -7   0   6   -0.33    1.75   0
  -7   1  -7   21.10    1.78   0
  -7   2   9    8.12    2.52   0
  -6  -1   4   -0.01    1.33   0
  -6   0  -6  200.53    2.78   0
  -6   1   8   65.99    2.25   0
  -5   1  -8  634.06    4.29   0
  -5   1   8   49.28    1.68   0
  -5   2  -9    1.24    1.84   0
  -5   3 -10    9.59    1.76   0
  -5   4  11   22.14    1.89   0
  -4  -1   4  171.97    3.19   0
  -4   1  -8   81.71    1.83   0
  -4   1   8   24.43    1.67   0
  -4   2  -9  132.73    2.42   0
  -4   2   9   16.55    1.26   0
  -4   3 -10    3.19    2.07   0
  -4   3  10   20.26    1.47   0
  -4   4 -11    0.12    1.84   0
  -4   4  11  220.34    3.10   0
  -3   0  -6    1.86    1.32   0
  -3   0   6    0.25    1.39   0
  -3   2  -9    5.66    1.17   0
  -3   3 -10   37.45    1.63   0
  -3   4 -11    0.80    1.65   0
  -2   0   5    0.45    0.90   0
  -2   2   8    2.71    1.06   0
  -2   4  10  125.18    2.03   0
  -1   2  -8    0.83    1.15   0
  -1   3  -9   97.60    2.08   0
  -1   4 -10  435.79    3.59   0
  -1   5 -11   45.66    1.76   0
  -1   5  10  324.51    2.92   0
   0   2  -7   43.57    1.42   0
   0   2   6   15.13    1.18   0
   0   6 -11   28.61    1.75   0
   0   6  10  302.84    2.91   0
   0   8  11   27.26    2.04   0
   1   3  -7    1.67    1.33   0
   1   3   6    1.98    1.06   0
   1   4   7  322.73    3.07   0
   1   5   8    6.87    1.11   0
   1   6 -10   91.28    1.93   0
   1   6   9  175.20    2.59   0
   1   8 -11   24.12    2.61   0
   1   8  10    0.25    1.70   0
   2   3  -5  601.11    4.88   0
   2   5  -8    2.04    1.11   0
   2   6  -9  315.18    3.08   0
   2   7   8   72.60    1.80   0
   2   8 -10   15.84    2.31   0
   2   9   9   -0.20    1.69   0
   3   4  -4   96.07    2.32   0
   3   5  -6   58.50    1.73   0
   3   6  -7   29.29    1.75   0
   3   7  -8   20.24    1.49   0
   3   8   7  182.79    2.60   0
   3  10   8   -0.29    1.91   0
   4   6  -4   37.42    1.73   0
   4   6   2   28.53    2.01   0
   4  10   6    1.91    2.36   0
   5   9  -3   28.63    2.55   0
   5  11  -5    0.41    2.57   0
  -9   0  -1   20.10    2.99   0
  -7   1   8  232.46    3.37   0
  -7   2  -8    0.35    1.90   0
  -6  -1  -3   81.26    2.43   0
  -6   1  -7  245.63    3.20   0
  -5   0  -6    1.11    1.17   0
  -5   0   7  312.97    3.43   0
  -4   0  -6   15.46    1.22   0
  -3   1   8    6.92    1.38   0
  -3   2   9   57.67    1.55   0
  -3   3  10   97.52    1.90   0
  -3   4  11  386.38    3.18   0
  -2  -1   2 2085.82   13.59   0
  -2   0  -5    2.19    1.26   0
  -2   1  -7    4.61    0.99   0
  -2   1   7  135.60    2.06   0
  -2   5 -11  148.27    2.32   0
  -2   5  11   14.52    1.52   0
  -1   0  -4    1.14    0.99   0
  -1   0   4    0.64    1.16   0
  -1   1  -6  319.27    3.25   0
  -1   1   6    2.89    0.96   0
  -1   6 -11   -0.25    2.20   0
  -1   6  11   24.82    1.66   0
   0   1  -5 2444.37    9.08   0
   0   3  -8    7.84    1.13   0
   0   4  -9    1.35    1.17   0
   0   5 -10   58.66    1.74   0
   0   7 -11   82.22    2.46   0
   0   7  11   80.46    2.57   0
   1   1  -2 1128.16    9.61   0
   1   2  -5  782.86    5.35   0
   1   4  -8  334.99    3.04   0
   1   5  -9   95.34    1.88   0
   1   7  10   34.39    2.05   0
   2   2  -1  927.53   13.30   0
   2   3   4  147.85    2.62   0
   2   5   7   18.98    1.57   0
   2   7  -9   22.97    1.87   0
   2   8   9   31.81    1.75   0
   2   9 -10    8.12    2.56   0
   3   6   6    3.71    1.42   0
   3   9  -9  139.62    2.61   0
   3   9   8   45.71    2.44   0
   4   7  -5    8.21    1.55   0
   4   7   4  210.72    3.46   0
   4   8  -6  225.75    3.43   0
   4   8   5    1.00    1.23   0
   4   9  -7  178.68    2.98   0
   5  10  -4   54.81    2.75   0
   5  10   3   51.25    2.58   0
  -8   0  -3    0.15    1.94   0
  -7   1  -6   14.23    2.03   0
  -6   0   7    0.47    1.18   0
  -6   2  -8    0.63    1.58   0
  -6   2  10    1.48    2.25   0
  -6   3  -9    0.56    1.83   0
  -5  -1  -3   18.99    1.63   0
  -5  -1   5   34.86    1.88   0
  -5   1  -7  168.83    2.74   0
  -5   2  10  156.72    2.33   0
  -5   3  11   11.86    1.77   0
  -5   4 -10    0.48    2.55   0
  -4   0   7    1.35    1.02   0
  -4   1  -7  488.34    3.96   0
  -4   2  10   29.17    1.74   0
  -4   3  11   10.06    1.96   0
  -3  -1   4  153.48    2.77   0
  -3   1  -7   47.38    1.51   0
  -3   4 -10    0.45    1.92   0
  -3   5 -11   37.05    1.86   0
  -3   5  12    1.75    1.88   0
  -2   2  -8  668.17    4.20   0
  -2   3  -9  466.21    3.41   0
  -2   3  10    5.89    1.25   0
  -2   4 -10    1.15    1.37   0
  -2   4  11   92.25    2.26   0
  -2   6 -11    1.08    2.26   0
  -2   6  12   -0.07    1.89   0
  -1   2   8  199.97    2.43   0
  -1   3   9  329.99    2.96   0
  -1   4  10   42.31    1.55   0
  -1   5 -10    0.32    1.79   0
  -1   5  11    0.14    1.90   0
   0   1   5 2435.68    9.15   0
   0   2   7   43.79    1.63   0
   0   3   8    7.38    1.09   0
   0   4   9    1.28    1.18   0
   0   5  10   57.39    1.70   0
   0   6 -10  299.92    3.17   0
   1   1   2  511.51    6.51   0
   1   2   5 1839.57    7.98   0
   1   4   8    1.97    1.41   0
   1   5   9   69.56    1.92   0
   1   7 -10  132.91    2.20   0
   2   2   1  416.95    7.62   0
   2   4  -6  407.25    3.66   0
   2   4   6  124.32    2.15   0
   2   6  -8  343.11    3.38   0
   2   6   8    1.43    1.17   0
   2   7   9   12.41    2.00   0
   3   4  -3   21.44    1.62   0
   3   4   3  464.02    5.02   0
   3   5  -5   71.73    2.10   0
   3   5   5  109.81    2.45   0
   3   7   7  171.46    2.52   0
   3   8  -8   12.87    1.47   0
   4   6  -3  270.46    4.60   0
   4   9   6  273.04    3.47   0
   4  10  -7    4.21    1.78   0
   5   9   2  110.22    3.53   0
   5  11   4   36.05    2.76   0
  -9   0   4   -0.26    2.44   0
  -8   0   6   73.20    2.81   0
  -8   1   8    0.15    1.89   0
  -7  -1  -1    6.55    1.67   0
  -7  -1   4  832.81    7.68   0
  -7   0  -4   -0.04    1.67   0
  -7   0   7  134.99    2.95   0
  -7   2  -7    0.05    2.26   0
  -6  -1   5    4.16    1.55   0
  -6   1   9  225.22    2.82   0
  -5   0  -5    6.13    1.44   0
  -5   1   9    5.14    1.27   0
  -5   2  -8   65.60    1.75   0
  -5   3  -9   59.49    1.90   0
  -4  -1   5    1.00    0.95   0
  -4   1   9  283.65    2.91   0
  -4   2  -8   74.57    1.72   0
  -4   3  -9   -0.53    1.32   0
  -4   4 -10   12.15    1.60   0
  -4   4  12  132.35    2.51   0
  -3   0  -5  310.70    3.29   0
  -3   0   7  591.10    4.16   0
  -3   2  -8    4.91    1.13   0
  -3   2  10  100.99    2.18   0
  -3   3  -9    1.20    1.22   0
  -3   3  11   94.31    2.34   0
  -3   6 -11   -0.06    1.90   0
  -2  -1  -1 2503.29   17.91   0
  -2  -1   3  727.68    6.71   0
  -2   0   6  813.31    5.12   0
  -2   1   8   13.05    1.17   0
  -2   5  12    1.39    2.34   0
  -1   1   7   77.46    1.99   0
  -1   2  -7    9.73    1.07   0
  -1   3  -8  369.74    3.32   0
  -1   4  -9  394.15    3.17   0
  -1   6  12   -0.45    2.50   0
  -1   7 -11   13.18    1.77   0
   0   1  -4  140.41    2.78   0
   0   2  -6   15.97    1.17   0
   0   5  -9  286.28    3.01   0
   0   6  11   32.52    1.71   0
   1   3  -6  115.08    2.06   0
   1   3   7    6.06    1.08   0
   1   6  -9    2.39    1.24   0
   1   6  10  120.51    2.10   0
   1   8 -10    4.51    2.01   0
   2   3  -4  475.50    4.70   0
   2   3   5   28.28    1.59   0
   2   5  -7   19.75    1.25   0
   2   8  -9  176.41    2.50   0
   2   8  10    0.22    2.17   0
   3   6  -6    7.92    1.11   0
   3   7  -7   70.59    1.83   0
   3   8   8   10.09    1.54   0
   3   9  -8   15.75    2.12   0
   4   6   3   26.89    1.58   0
   4   9  -6   92.78    2.65   0
   4  10   7   68.13    2.47   0
   5   9  -2  122.91    4.22   0
   5  11  -4   -0.66    2.43   0
  -8   2  -6  153.93    3.18   0
  -7   1   9   18.98    1.87   0
  -7   3  -8    1.37    1.97   0
  -6  -1  -2   37.10    2.01   0
  -6   0   8  913.58    5.85   0
  -6   1  -6    3.47    1.71   0
  -6   4  -9   59.24    2.76   0
  -5   0   8    0.34    1.12   0
  -4   0  -5   -0.18    0.89   0
  -4   0   8   17.03    1.63   0
  -3  -1   5  352.21    3.96   0
  -3   1   9   66.50    1.60   0
  -3   4  12   16.81    1.75   0
  -3   5 -10   -0.25    1.85   0
  -2   0  -4  394.47    4.01   0
  -2   1  -6   31.66    1.28   0
  -2   4  -9   -0.19    1.51   0
  -2   5 -10   32.92    1.63   0
  -2   7 -11   10.09    1.93   0
  -1   0  -3 1009.55    7.12   0
  -1   0   5   12.24    1.16   0
  -1   1  -5  228.36    2.94   0
  -1   2   9   62.78    1.82   0
  -1   3  10  259.98    2.63   0
  -1   4  11   79.04    2.28   0
  -1   6 -10  112.18    2.03   0
   0   0   2 2686.52   14.37   0
   0   1   6  473.72    4.04   0
   0   3  -7   37.56    1.39   0
   0   3   9  396.29    3.47   0
   0   4  -8   75.85    1.66   0
   0   4  10  670.17    4.00   0
   0   7 -10   45.42    1.75   0
   1   1  -1  277.45    6.92   0
   1   1   3  227.98    3.85   0
   1   2  -4    1.83    1.34   0
   1   2   6    4.87    1.38   0
   1   4  -7   52.18    1.49   0
   1   5  -8    0.08    1.02   0
   1   7  11   11.59    1.79   0
   1   9 -10   33.95    2.35   0
   2   2   2  290.70    4.88   0
   2   4   7  243.85    2.99   0
   2   5   8   31.59    1.46   0
   2   6   9    0.07    1.69   0
   2   7  -8   51.09    1.99   0
   2   9  -9    0.34    2.15   0
   3   4   4   72.76    2.25   0
   3   6   7  374.12    3.48   0
   3   7   8  360.07    3.72   0
   3   9   9  177.77    2.84   0
   3  10  -8   -0.34    2.33   0
   4   7  -4    4.23    1.46   0
   4   7   5   68.24    2.00   0
   4   8  -5  271.58    3.65   0
   4   8   6    2.03    1.38   0
   4   9   7   44.72    2.45   0
   5   9   3  209.80    4.34   0
   5  10  -3  101.01    3.34   0
   5  10   4   88.80    3.10   0
  -9   0   0    0.03    2.53   0
  -9   1  -3   23.94    2.12   0
  -8   0   7    0.23    2.26   0
  -7  -1   5   83.78    2.61   0
  -7   0   8   -0.51    1.92   0
  -6  -1   6    3.88    1.51   0
  -6   1  10    0.31    2.21   0
  -6   2  -7   44.63    1.72   0
  -6   2  11   11.05    1.99   0
  -6   3  -8    0.67    1.53   0
  -5  -1   6   13.19    1.22   0
  -5   1  -6  817.70    5.22   0
  -5   1  10   16.81    1.55   0
  -5   2  11   26.77    1.81   0
  -5   4  -9   36.96    1.76   0
  -4  -1   6   -0.07    0.90   0
  -4   1  -6  592.51    4.46   0
  -4   1  10   -0.34    1.59   0
  -4   2  11   15.69    1.56   0
  -4   3  12    0.00    1.82   0
  -4   4  -9  158.49    2.63   0
  -4   5 -10    0.23    1.67   0
  -3   0   8    0.78    1.28   0
  -3   1  -6  656.69    4.37   0
  -3   4  -9   90.04    2.08   0
  -2  -1   4  372.16    4.28   0
  -2   0   7   -0.89    0.91   0
  -2   2  -7  316.82    2.97   0
  -2   2  10  581.37    3.85   0
  -2   3  -8  221.43    2.48   0
  -2   3  11  284.23    2.85   0
  -2   4  12    0.12    1.70   0
  -2   6 -10   12.19    2.00   0
  -1   5  -9   70.34    1.93   0
  -1   5  12    2.60    1.74   0
   0   0   3   -0.03    1.97   0
   0   2   8  298.27    2.95   0
   0   5  11   67.70    1.84   0
   0   6  -9   11.69    1.70   0
   0   6  12   -0.06    2.27   0
   0   8 -10  139.42    2.77   0
   1   3   8  377.98    3.42   0
   1   4   9  404.67    3.30   0
   1   5  10   -1.01    1.32   0
   1   7  -9   16.35    1.40   0
   2   2   3  389.26    4.76   0
   2   4  -5  369.47    3.80   0
   2   6  -7   13.85    1.48   0
   2   7  10   72.00    1.99   0
   2  10  -9    7.15    2.26   0
   3   5  -4  631.89    5.55   0
   3   5   6   37.21    1.52   0
   3   8  -7   18.03    1.48   0
   3   8   9   74.62    2.71   0
   4   6  -2   56.46    2.78   0
   4   6   4    0.62    1.02   0
   4  10  -6   37.32    1.93   0
  -8   0  -2  310.73    4.69   0
  -8   1  -4   16.42    1.70   0
  -7   0  -3  124.92    2.88   0
  -7   2  -6    1.39    2.01   0
  -7   3  -7   12.44    2.39   0
  -5  -1  -2  628.31    6.55   0
  -5   0   9    1.60    1.71   0
  -5   2  -7  565.63    4.02   0
  -5   3  -8   75.03    1.84   0
  -4  -1  -2   21.35    1.64   0
  -4   2  -7    8.93    1.41   0
  -4   3  -8   78.64    1.77   0
  -4   6 -10    9.89    2.27   0
  -3  -1   6 1662.13    7.67   0
  -3   0  -4   -0.68    1.29   0
  -3   1  10   42.27    1.89   0
  -3   2  -7    1.07    0.99   0
  -3   2  11  127.13    2.15   0
  -3   3  -8  272.99    2.73   0
  -3   3  12   46.66    1.86   0
  -3   6 -10    0.19    1.60   0
  -2   1   9   91.42    1.80   0
  -1   0   6    0.01    0.90   0
  -1   1   8  489.06    3.60   0
  -1   2  -6    4.56    0.90   0
  -1   3  -7    7.47    1.33   0
  -1   4  -8    0.64    0.95   0
  -1   7 -10   33.77    1.72   0
   0   2  -5  300.54    3.21   0
   0   5  -8   34.61    1.73   0
   0   9 -10   -0.35    2.49   0
   1   1   4 4778.47   14.01   0
   1   3  -5    3.11    1.29   0
   1   6  -8  140.72    2.17   0
   1   6  11    1.06    1.63   0
   1   8  -9   74.30    1.86   0
   2   3   6  527.93    4.12   0
   2   5  -6   14.04    1.15   0
   2   5   9   55.97    1.97   0
   2   8  -8    8.46    1.33   0
   3   4  -2   81.25    2.93   0
   3   4   5    2.78    1.39   0
   3   6  -5  132.63    2.64   0
   3   6   8   30.29    1.86   0
   3   7  -6    1.59    1.12   0
   3   9  -7   32.46    2.14   0
   4   7   6  154.36    2.60   0
   4   8   7  140.29    2.54   0
   4   9  -5   43.90    2.25   0
   4  11  -6  105.16    2.57   0
   5   9   4   16.52    2.15   0
   5  10   5   11.15    2.50   0
   5  11  -3   13.83    2.44   0
  -9   0   6   -0.11    2.69   0
  -8  -1   3  156.32    5.05   0
  -8   0   8    0.23    2.28   0
  -8   3  -6   27.13    2.76   0
  -7  -1   6    0.21    1.31   0
  -6  -1   7  319.29    3.84   0
  -6   0   9    0.07    1.40   0
  -6   1  -5  169.07    2.78   0
  -6   4  -8    3.00    2.17   0
  -5  -1   7   19.84    1.37   0
  -5   1  11    1.34    2.00   0
  -5   5  -9   32.32    2.23   0
  -4  -1   7   95.71    1.93   0
  -4   0  -4  348.37    3.89   0
  -4   0   9    0.15    1.13   0
  -4   2  12   32.91    2.24   0
  -4   5  -9  190.28    2.74   0
  -3   5  -9   30.66    1.89   0
  -3   7 -10    1.92    2.23   0
  -2  -1   5  123.73    2.35   0
  -2   0   8   10.03    1.14   0
  -2   1  -5   17.68    1.18   0
  -2   2  11   27.23    1.98   0
  -2   3  12  135.92    2.27   0
  -2   4  -8   98.32    2.06   0
  -2   5  -9   54.56    1.57   0
  -2   7 -10   65.72    1.88   0
  -1   2  10   47.09    1.53   0
  -1   3  11   -0.51    1.28   0
  -1   4  12    5.27    1.66   0
  -1   6  -9  166.15    2.22   0
  -1   8 -10    0.15    1.63   0
   0   0   4 1770.78    8.59   0
   0   1  -3 1386.37    8.41   0
   0   1   7  383.96    3.33   0
   0   2   9    1.61    0.94   0
   0   3  -6  520.36    3.90   0
   0   3  10    5.67    1.23   0
   0   4  -7  190.12    2.38   0
   0   4  11    0.24    1.41   0
   0   5  12    0.01    1.72   0
   0   7  -9  192.17    2.33   0
   1   2   7    8.50    1.12   0
   1   3   9   96.20    2.07   0
   1   4  -6   54.34    1.56   0
   1   4  10  446.08    3.67   0
   1   5  -7  125.89    2.04   0
   1   5  11   42.78    2.23   0
   1   9  -9    1.78    1.94   0
   2   2   4 2306.92    9.76   0
   2   3  -3  198.47    3.40   0
   2   4   8   94.99    1.85   0
   2   6  10   12.20    1.52   0
   2   7  -7    1.35    1.52   0
   2   7  11   13.92    2.57   0
   2   9  -8   95.61    2.45   0
   3   5   7  159.59    2.44   0
   3   7   9   67.39    2.04   0
   3  10  -7   28.19    2.28   0
   4   6   5  114.91    2.36   0
   4   8  -4    0.51    1.54   0
   4   9   8   14.28    1.99   0
   5   8   1  132.29    6.29   0
   5   8   2    0.08    1.87   0
   5   9  -1  210.05    6.03   0
   5  10  -2  125.74    3.97   0
  -9   1  -2   26.14    2.66   0
  -8  -1   4   77.24    3.16   0
  -7  -1   0   99.96    4.06   0
  -7   0   9    5.43    1.80   0
  -6  -1  -1   32.07    2.23   0
  -6   1  11   20.19    2.01   0
  -6   2  -6  224.91    2.95   0
  -6   3  -7  286.13    3.04   0
  -5   0  10   -0.87    1.80   0
  -5   4  -8   10.31    1.79   0
  -4   1  11   73.09    1.88   0
  -3  -1   7   87.54    1.84   0
  -3   0   9   32.29    1.37   0
  -3   1  -5   69.35    1.95   0
  -3   2  12   32.89    2.33   0
  -3   4  -8   25.53    1.75   0
  -2  -1   6   34.69    1.68   0
  -2   0  -3    4.59    1.35   0
  -2   1  10    2.55    1.16   0
  -2   2  -6    1.16    0.85   0
  -2   3  -7   39.49    1.40   0
  -2   6  -9    0.87    1.69   0
  -2   8 -10   -0.31    1.71   0
  -1   0  -2    2.13    1.92   0
  -1   0   7  352.98    3.26   0
  -1   1  -4 4861.81   13.34   0
  -1   1   9  249.63    2.59   0
  -1   5  -8   10.31    1.43   0
  -1   9 -10   26.34    1.93   0
   0   0   5    0.18    0.92   0
   0   1   8   -0.50    1.24   0
   0   6  -8  229.10    2.81   0
   0   8  -9   21.48    1.98   0
   1   1   5  216.38    2.88   0
   1   2  -3 2777.88   11.91   0
   1   7  -8    1.21    1.11   0
   1  10  -9    4.74    1.75   0
   2   2   5  163.82    2.72   0
   2   3   7   36.22    1.43   0
   2   6  -6   19.73    1.48   0
   2  10  -8   -0.50    2.11   0
   3   4   6    7.11    1.11   0
   3   8  -6  159.96    2.53   0
   3  11  -7    0.12    2.33   0
   4   5   2  273.30    5.15   0
   4   5   3  300.96    4.52   0
   4   7  -3   53.70    2.01   0
   4   7   7  100.29    2.50   0
   4   8   8  151.89    3.02   0
   4  10  -5  430.24    4.57   0
   5   8   3   25.00    2.15   0
   5   9   5   24.42    2.32   0
   5  10   6   72.02    2.93   0
  -8  -1   5    0.06    1.92   0
  -8   1  -3   44.95    2.30   0
  -7  -1   7   71.93    2.14   0
  -7   4  -7  136.87    2.78   0
  -6  -1   8   65.13    1.90   0
  -6   0  -3    0.24    1.32   0
  -6   0  10    6.42    1.64   0
  -6   5  -8   -0.31    2.31   0
  -5  -1   8   50.28    1.63   0
  -5   1  -5   53.78    1.66   0
  -5   2  -6   91.14    2.07   0
  -5   3  -7    1.23    1.14   0
  -5   6  -9   41.53    2.01   0
  -4  -1   8   29.87    1.39   0
  -4   0  10  111.74    2.06   0
  -4   1  -5   39.79    1.43   0
  -4   3  -7  197.70    2.54   0
  -4   4  -8  259.55    2.61   0
  -4   6  -9   94.24    2.40   0
  -3   1  11   28.15    1.50   0
  -3   2  -6   34.84    1.57   0
  -3   3  -7  203.62    2.42   0
  -3   6  -9  198.81    2.37   0
  -2   0   9    0.88    0.99   0
  -2   2  12   17.61    2.02   0
  -1  -1   3 4311.42   15.41   0
  -1   0   8    0.96    1.22   0
  -1   2  11  176.76    2.26   0
  -1   3  12    1.73    1.58   0
  -1   4  -7  315.76    3.02   0
  -1   7  -9   13.83    1.38   0
   0   2  10  113.33    2.24   0
   0   3  11   -1.11    1.41   0
   0   4  12    6.03    1.65   0
   0   9  -9  315.55    3.34   0
   1   1   6  306.62    3.09   0
   1   2   8   -0.13    1.08   0
   1   4  11    0.86    1.89   0
   1   6  -7   47.64    1.47   0
   1   8  -8   36.49    1.79   0
   2   3   8  213.28    2.72   0
   2   4  -4   40.12    1.55   0
   2   4   9    0.13    1.11   0
   2   5  -5  130.20    2.42   0
   2   5  10   33.93    1.60   0
   2   6  11    3.02    1.72   0
   2   8  -7  185.12    2.70   0
   2  11  -8   -0.81    1.91   0
   3   3   2  279.24    4.81   0
   3   3   3  829.76    6.89   0
   3   5   8  990.46    5.48   0
   3   6   9  180.79    2.52   0
   3   7  -5  138.54    2.54   0
   3   7  10   -0.19    1.71   0
   3   9  -6   48.43    2.08   0
   4   5   1  487.66    9.33   0
   4   5   4  427.12    4.78   0
   4   6   6   42.22    1.69   0
   4  11  -5    0.13    1.96   0
   5   8   4  105.43    2.92   0
  -9   2  -3    0.13    2.53   0
  -8  -1   6   12.66    2.29   0
  -8   0  -1    0.21    1.73   0
  -7  -1   8  230.12    3.51   0
  -7   0  10    0.16    1.93   0
  -7   2  -5    3.41    1.33   0
  -7   3  -6  266.88    3.00   0
  -5  -2   3   73.18    2.78   0
  -5  -2   4   20.51    1.65   0
  -5  -2   5  123.76    2.71   0
  -5  -1   9    7.78    1.78   0
  -5   5  -8   12.87    2.00   0
  -4  -2   3  599.74    6.77   0
  -4  -2   4  147.63    3.00   0
  -4   1  12   -0.41    1.71   0
  -4   2  -6  122.03    2.00   0
  -3  -1  -1    0.86    1.19   0
  -3  -1   8   10.74    1.08   0
  -3   0  10   -0.76    1.18   0
  -3   5  -8  986.52    5.11   0
  -2  -1   7  135.17    2.15   0
  -2   1  11  600.85    3.88   0
  -2   5  -8   23.93    1.31   0
  -2   7  -9    8.63    1.36   0
  -1  -1   2 1084.75    9.42   0
  -1  -1   4    0.03    1.05   0
  -1  -1   5   76.17    2.10   0
  -1   1  10  349.64    3.05   0
  -1   2  -5 1852.70    7.58   0
  -1   3  -6    2.41    0.85   0
  -1   6  -8   14.06    1.57   0
  -1   8  -9   62.55    1.72   0
   0   0   6   46.09    1.53   0
   0   1   9   34.85    1.66   0
   0   2  -4  148.69    2.50   0
   0   5  -7   44.48    1.46   0
   0   7  -8  614.22    4.04   0
   0  10  -9   -0.43    2.06   0
   1   2   9  370.69    3.30   0
   1   3  -4   63.94    2.00   0
   1   3  10  134.75    2.05   0
   1   5  -6 1272.03    5.93   0
   1   5  12    0.02    1.82   0
   1   9  -8   73.18    2.21   0
   2   2   6    0.06    0.96   0
   2   9  -7   15.18    1.82   0
   3   3   4  224.81    3.25   0
   3   4   7  166.24    2.41   0
   3   5  -3  182.65    3.27   0
   3   6  -4    0.08    0.99   0
   4   6   7    0.26    1.56   0
   4   7   8   10.46    1.53   0
   4   8   9   11.45    2.53   0
   4   9  -4   27.94    1.81   0
   4  12  -5   66.16    2.39   0
   5   9   6    0.20    2.31   0
   5  11  -2   45.12    2.83   0
  -9   0   1   57.08    3.83   0
  -8  -1   7   50.54    2.68   0
  -8   3  -5   76.99    2.26   0
  -7   0  -2    0.33    1.12   0
  -7   5  -7   -0.02    2.48   0
  -6  -2   4  313.90    4.72   0
  -6  -1   9  227.38    2.95   0
  -6   0  11   -0.11    1.84   0
  -6   1  -4   57.41    2.04   0
  -6   3  -6  254.59    3.04   0
  -6   4  -7   94.43    2.00   0
  -6   6  -8   -0.51    2.26   0
  -5  -2   6   54.42    1.95   0
  -5  -1  -1  178.89    4.08   0
  -5   0  11  180.10    2.60   0
  -4  -2   5  129.13    2.49   0
  -4  -2   6  130.93    2.46   0
  -4  -1   9  292.92    2.97   0
  -4   0  11   -0.37    1.47   0
  -4   5  -8   54.01    1.55   0
  -4   7  -9   34.86    1.85   0
  -3  -1   9   65.71    1.86   0
  -3   0  -3  194.94    3.02   0
  -3   1  12   -0.29    1.53   0
  -3   7  -9   66.90    1.84   0
  -2  -1   8   17.91    1.55   0
  -2   0  10  454.16    3.46   0
  -2   1  -4  329.25    3.45   0
  -2   4  -7  242.85    2.54   0
  -2   8  -9   31.38    1.66   0
  -1  -1   6    0.80    1.30   0
  -1   0   9  166.02    2.42   0
  -1   2  12    7.19    1.55   0
  -1   3  13    2.22    1.87   0
  -1   9  -9  140.00    2.30   0
   0   0   7   -0.51    1.00   0
   0   2  11    1.08    1.67   0
   0   3  -5 1929.24    7.71   0
   0   3  12    0.55    1.56   0
   0   4  -6    7.67    1.02   0
   1   1   7  102.29    1.87   0
   1   4  -5  861.80    5.27   0
   1   4  12    2.57    2.08   0
   1   7  -7   64.44    1.64   0
   1  10  -8    6.30    1.93   0
   2   2   7  327.98    3.28   0
   2   3   9  475.59    3.71   0
   2   4  10    1.64    1.32   0
   2   5  11  147.31    2.38   0
   2   7  -6    0.78    1.00   0
   3   3   1 1256.13   13.77   0
   3   3   5  356.01    3.72   0
   3   4   8   32.02    1.70   0
   3   5   9   32.25    1.57   0
   3   6  10   -0.06    1.62   0
   3   8  -5   68.66    2.12   0
   3  10  -6  106.48    2.25   0
   3  11  -6   37.56    2.37   0
   4   5   5   63.04    1.82   0
   5   8   5   35.71    1.88   0
   5  12  -2   23.87    2.84   0
  -9   1  -1   83.08    3.07   0
  -7  -1   9   22.78    1.92   0
  -7   4  -6   28.04    2.25   0
  -6  -2   5   89.96    2.35   0
  -6  -2   6  155.86    3.00   0
  -6   2  -5    4.86    1.19   0
  -5  -2   7  388.10    4.06   0
  -5  -1  10   15.00    2.00   0
  -5   3  -6   65.34    1.88   0
  -5   4  -7  262.09    2.71   0
  -5   6  -8   78.70    1.95   0
  -4  -2   2 1944.58   15.60   0
  -4  -2   7  778.08    5.23   0
  -4  -1  -1   74.59    2.77   0
  -4  -1  10    0.98    1.66   0
  -4   4  -7   58.92    1.51   0
  -4   6  -8  237.07    2.88   0
  -4   8  -9   10.10    1.85   0
  -3  -2   3  688.09    6.79   0
  -3  -2   4  572.95    5.37   0
  -3  -2   5 1119.48    6.71   0
  -3   0  11   42.61    1.63   0
  -3   4  -7  170.25    2.15   0
  -3   6  -8   30.78    1.82   0
  -3   8  -9   72.90    1.93   0
  -2   1  12   14.22    1.59   0
  -2   2  -5  160.30    2.29   0
  -2   2  13    2.37    1.88   0
  -2   3  -6  556.46    3.80   0
  -2   6  -8    4.19    1.07   0
  -2   9  -9    0.03    1.64   0
  -1  -1   7   80.23    1.95   0
  -1   1  11   67.24    1.69   0
  -1   5  -7   38.20    1.33   0
  -1   7  -8    9.56    1.21   0
  -1  10  -9    0.39    1.79   0
   0   0   8    7.19    1.35   0
   0   1  10    2.20    1.10   0
   0   6  -7  218.81    2.45   0
   0   8  -8   92.58    1.85   0
   1   1   8  631.50    4.16   0
   1   2  10   78.01    2.01   0
   1   3  11  118.44    2.09   0
   1  11  -8    0.93    1.73   0
   2   3  -2  404.46    5.60   0
   2   6  -5   96.35    2.12   0
   2  10  -7  206.26    2.68   0
   2  11  -7   81.82    2.48   0
   3   3   6  222.76    2.80   0
   3  12  -6   17.19    1.97   0
   4   5   6   10.74    1.17   0
   4   6  -1  351.65    6.80   0
   4   6   8  227.57    3.13   0
   4   7   9   38.70    2.01   0
   4   8  -3    8.43    1.27   0
   4  10  -4  112.37    2.51   0
   5   8   6   84.32    2.72   0
   5   9   7   -0.09    1.89   0
  -8  -1   8    0.00    1.85   0
  -8   1  -2    0.67    1.82   0
  -7   1  -3   68.43    2.14   0
  -7   2  -4   82.23    2.30   0
  -7   3  -5    1.86    1.84   0
  -6  -2   3  195.92    4.70   0
  -6  -2   7   58.42    2.21   0
  -6  -1  10    1.44    1.59   0
  -6   5  -7   39.36    1.75   0
  -5  -2   2   84.00    3.99   0
  -5   0  12    0.24    1.87   0
  -5   1  -4   83.36    1.96   0
  -5   2  -5   29.74    1.35   0
  -5   7  -8    0.10    2.19   0
  -4   0  12   57.36    2.00   0
  -4   1  -4  465.04    4.13   0
  -4   2  -5   84.21    1.96   0
  -4   3  -6   85.04    1.71   0
  -3  -2   6   47.15    1.58   0
  -3  -2   7  545.38    4.28   0
  -3  -1  10   44.12    1.53   0
  -3   0  12   -0.59    1.93   0
  -3   1  -4  427.44    3.90   0
  -3   2  -5  478.65    3.76   0
  -3   3  -6  220.28    2.49   0
  -3   9  -9  164.50    2.49   0
  -2  -1   9   87.88    1.78   0
  -2   0  11   -0.60    1.24   0
  -2   5  -7   18.04    1.41   0
  -2   7  -8   60.92    1.89   0
  -1   0  10   -0.29    1.10   0
  -1   1  -3  215.29    3.24   0
  -1   2  13   -0.56    1.78   0
  -1   4  -6  645.79    4.05   0
  -1   8  -8  277.32    2.94   0
   0   1  -2   79.29    2.91   0
   0   2  12   39.61    2.20   0
   0   3  13   17.96    1.96   0
   0   5  -6  699.12    4.39   0
   0   9  -8  317.76    2.96   0
   0  10  -8    0.28    2.02   0
   1   0   4    1.43    1.41   0
   1   0   5 3158.83   10.38   0
   1   3  12    0.48    1.94   0
   1   6  -6  263.63    2.86   0
   1   8  -7  205.40    2.50   0
   2   2   8  687.79    4.35   0
   2   3  10   32.49    1.55   0
   2   4  11   16.46    1.61   0
   2   5  -4 1134.55    6.62   0
   2   8  -6  131.62    2.14   0
   3   3   7  206.16    2.56   0
   3   4   9   92.78    1.90   0
   3   5  10    0.16    1.43   0
   3   6  11    0.39    1.89   0
   3   7  -4  235.50    3.30   0
   3   9  -5  157.44    2.71   0
   4   5   7  452.24    4.19   0
   4   7  -2    0.53    1.23   0
   4  11  -4    0.86    1.53   0
   4  12  -4    5.89    2.38   0
   5   7   3  442.64    6.21   0
   5   7   4   12.64    1.88   0
   5   7   5    3.05    1.65   0
   5   8   7   33.69    2.33   0
   5  10  -1   52.37    2.89   0
  -9   2  -2    1.19    2.35   0
  -8   3  -4    0.10    2.05   0
  -8   4  -5   -0.13    1.77   0
  -7  -2   5  100.21    2.89   0
  -7  -2   6  121.31    2.90   0
  -7  -1  10    7.74    1.94   0
  -6  -2   8  482.17    4.46   0
  -6  -1  11   17.80    2.62   0
  -6   0  -2    0.20    1.30   0
  -6   4  -6  255.59    2.74   0
  -6   6  -7    0.03    2.18   0
  -5  -2   8  102.51    2.09   0
  -5  -1  11    2.12    1.65   0
  -5   5  -7    1.98    1.27   0
  -4  -2   8   18.46    1.33   0
  -4  -1  11   74.28    1.93   0
  -4   5  -7  436.30    3.24   0
  -4   7  -8    9.64    1.42   0
  -3  -2   8  855.56    5.16   0
  -3   5  -7  157.80    2.11   0
  -3   7  -8  362.03    3.00   0
  -2  -2   4  215.08    3.33   0
  -2  -2   5 4157.39   12.52   0
  -2  -2   6 3462.77   10.78   0
  -2  -1  10    0.62    1.48   0
  -2   0  -2 2770.55   12.92   0
  -2   1  13    0.40    1.82   0
  -2   8  -8  143.32    2.38   0
  -1  -1   8  501.96    3.70   0
  -1   1  12   -0.40    1.47   0
  -1   2  -4  134.70    2.41   0
  -1   3  -5   83.92    1.76   0
  -1   6  -7  282.31    2.64   0
  -1   9  -8   -0.46    1.79   0
   0   0   9   -0.83    1.04   0
   0   1  11  124.07    2.07   0
   0   7  -7    3.63    1.12   0
   0  11  -8   64.65    2.01   0
   1   0   3 1019.53    7.15   0
   1   0   6    0.35    0.91   0
   1   1   9   30.94    1.33   0
   1   2  11    4.20    1.40   0
   1   5  -5   70.52    1.99   0
   1   9  -7  217.90    2.55   0
   2   1   3  269.71    3.91   0
   2   1   4  334.93    3.83   0
   2   1   5   16.12    1.22   0
   2   1   6   33.17    1.61   0
   2   2   9   13.23    1.59   0
   2   4  -3    0.12    0.84   0
   2   9  -6  239.64    2.79   0
   3   3   8  299.51    3.15   0
   3   4  -1 1705.64   15.08   0
   3   5  11   40.67    2.30   0
   3  10  -5   56.11    2.13   0
   4   5   8   62.43    2.06   0
   4   6   9   97.05    2.22   0
   4   9  -3  130.31    2.88   0
   5   7   6    1.83    1.77   0
  -7  -2   7   46.35    2.33   0
  -7   5  -6  342.45    3.27   0
  -6  -2   9   10.47    1.85   0
  -6   3  -5    0.19    1.10   0
  -5  -2   9    0.05    1.29   0
  -5   4  -6  329.14    2.98   0
  -5   6  -7    6.60    1.82   0
  -5   8  -8   15.78    1.87   0
  -4  -2   9   16.99    1.29   0
  -4   8  -8  149.65    2.34   0
  -3  -2   2   13.13    1.57   0
  -3  -1  11   27.87    1.52   0
  -3   0  13   83.21    2.83   0
  -3   8  -8    8.61    1.43   0
  -2  -2   7  139.00    2.15   0
  -2   0  12   -0.43    1.45   0
  -2   4  -6  130.38    1.92   0
  -2   6  -7  305.80    2.89   0
  -2   9  -8   16.95    1.98   0
  -1  -1   1  266.45    6.61   0
  -1  -1   9  249.78    2.63   0
  -1   0  11   93.71    1.82   0
  -1   1  13    3.67    2.10   0
  -1  10  -8  101.58    2.06   0
  -1  11  -8   44.72    2.56   0
   0  -1   4  139.28    2.58   0
   0  -1   5 2523.01    9.27   0
   0  -1   6  468.87    3.86   0
   0   0  10  147.30    2.34   0
   0   2  13   35.38    2.05   0
   0   4  -5 1466.90    6.56   0
   0   8  -7   -0.16    1.09   0
   1   0   7   21.93    1.17   0
   1   1  10  280.89    2.77   0
   1   2  -2 2118.11   12.02   0
   1   4  -4   85.97    2.01   0
   1   7  -6  610.05    4.06   0
   1  10  -7    3.11    1.37   0
   1  11  -7  123.61    2.47   0
   1  12  -7   28.48    2.57   0
   2   1   7    4.74    1.09   0
   2   3  11   50.29    1.70   0
   2   4  12    0.74    1.85   0
   2   7  -5  223.17    2.74   0
   2  10  -6   57.43    1.74   0
   3   4  10    0.36    1.43   0
   3   6  -3  234.35    3.45   0
   3  11  -5   15.65    1.91   0
   3  12  -5   60.42    2.63   0
   4   4   3   48.75    2.17   0
   4   4   4   12.78    1.21   0
   4   4   5   93.29    2.12   0
   4   4   6   -0.02    1.41   0
   4   6  10    9.26    2.25   0
   5   7   2  132.39    4.84   0
   5   7   7    0.88    1.86   0
   5   8   8   21.22    2.04   0
   5   9   0   11.25    2.58   0
   5  11  -1  280.77    5.19   0
  -9  -1   5   17.73    3.08   0
  -8   0   0  430.12    5.91   0
  -8   5  -5   24.76    2.01   0
  -7  -2   4   85.59    3.17   0
  -7  -2   8  180.65    2.99   0
  -7   0  -1  798.17    7.05   0
  -7   4  -5   96.03    2.01   0
  -7   6  -6    0.00    2.31   0
  -6  -1   0    0.77    1.32   0
  -6   2  -4   11.07    1.16   0
  -6   5  -6  179.76    2.56   0
  -6   7  -7   48.17    1.93   0
  -5  -2  10  141.23    2.71   0
  -5   0  -2    0.36    1.10   0
  -5   3  -5  157.07    2.40   0
  -4  -2  10   23.77    1.88   0
  -4  -1  12   -1.18    1.70   0
  -4   4  -6   -0.28    0.95   0
  -4   6  -7   -0.57    1.15   0
  -4   9  -8    9.34    1.82   0
  -3  -2   9   60.01    1.64   0
  -3  -1  12   -0.10    2.07   0
  -3   4  -6    6.57    1.02   0
  -3   6  -7  385.88    3.03   0
  -3   9  -8   46.07    1.77   0
  -3  10  -8   -0.40    2.43   0
  -2  -2   3  380.94    4.78   0
  -2  -2   8    3.60    1.04   0
  -2  -1   0   52.67    5.24   0
  -2  -1  11  603.92    3.92   0
  -2   0  13    0.33    2.43   0
  -2   1  -3  250.42    3.35   0
  -2   3  -5   26.65    1.12   0
  -2  10  -8    5.49    1.58   0
  -1  -1  10  374.43    3.35   0
  -1   0  12    0.07    1.46   0
  -1   5  -6   56.99    1.41   0
  -1   7  -7   63.20    1.52   0
   0  -1   3 1420.48    8.42   0
   0  -1   7  384.44    3.30   0
   0  -1   8    0.94    1.26   0
   0   1  12    7.19    1.41   0
   0   2  -3 1047.28    6.79   0
   0   3  -4   89.41    1.89   0
   0   6  -6  230.99    2.56   0
   0   9  -7   18.11    1.31   0
   1   0   2   -0.78    1.97   0
   1   0   8   -1.01    1.05   0
   1   2  12    0.41    1.55   0
   1   3  -3  233.34    3.31   0
   1   8  -6  527.81    3.97   0
   2   1   8  227.49    2.54   0
   2   2  10   20.59    1.40   0
   2   3  12    1.12    2.08   0
   2  11  -6  109.43    2.17   0
   2  12  -6   -0.00    1.69   0
   3   2   4  314.90    3.75   0
   3   2   5  467.78    4.16   0
   3   2   6   36.42    1.41   0
   3   3   9   -0.03    1.14   0
   3   4  11    0.22    2.20   0
   3   5  -2   13.67    1.28   0
   3   8  -4   60.81    1.76   0
   4   4   7   57.14    1.65   0
   4   5   9  186.73    2.61   0
   4  10  -3   29.12    1.92   0
   5  12  -1    1.02    2.30   0
  -9   1   0   21.91    2.40   0
  -8   4  -4    0.80    1.98   0
  -7  -2   9   17.56    1.87   0
  -7  -1   1    6.03    2.08   0
  -7   3  -4    1.95    1.19   0
  -6  -2  10    1.82    1.69   0
  -5  -2  11   27.09    2.21   0
  -5   1  -3   20.07    1.52   0
  -5   2  -4   35.95    1.59   0
  -5   5  -6   12.19    1.59   0
  -5   7  -7   -0.04    1.42   0
  -4   3  -5   66.07    1.58   0
  -4   7  -7  102.32    2.18   0
  -3  -2  10  102.77    1.94   0
  -3   3  -5  355.79    3.15   0
  -3   7  -7  159.87    2.28   0
  -2  -2   9    5.61    1.05   0
  -2  -1  12   11.05    1.90   0
  -2   2  -4 2274.79    8.47   0
  -2   5  -6   59.36    1.76   0
  -2   7  -7    1.43    1.03   0
  -1  -2   5  837.06    5.47   0
  -1  -2   6  464.13    3.81   0
  -1  -2   7   29.52    1.57   0
  -1   4  -5  109.39    2.03   0
  -1   8  -7    0.09    1.11   0
   0  -1   9   30.01    1.57   0
   0   0  11    0.81    1.20   0
   0   1  13   13.70    2.47   0
   0  10  -7    1.78    1.30   0
   0  11  -7    1.59    1.86   0
   0  12  -7    3.01    2.46   0
   1   0   9  760.39    4.32   0
   1   1  11   12.65    1.32   0
   1   2  13   99.19    2.67   0
   1   6  -5 1548.95    6.69   0
   1   9  -6  105.49    2.11   0
   2   1   2  286.15    4.62   0
   2   1   9 1119.91    5.51   0
   2   2  11    0.42    1.35   0
   2   6  -4    7.27    0.98   0
   2   8  -5    3.66    1.12   0
   3   2   3  471.52    5.11   0
   3   2   7   -0.31    0.99   0
   3   2   8    1.98    1.45   0
   3   3  10   37.55    1.61   0
   3   9  -4    4.68    1.49   0
   4   4   8  280.74    3.03   0
   4   5  10   -0.77    2.25   0
   4   8  -2   78.27    2.55   0
   4  11  -3    5.58    1.48   0
   4  12  -3    0.50    2.29   0
   5   6   4   24.63    1.90   0
   5   6   5  133.63    2.92   0
   5   6   6   25.64    1.93   0
   5   7   8    0.03    1.69   0
  -9   2  -1   62.52    2.74   0
  -9   3  -2    3.97    2.33   0
  -8  -2   7    2.01    2.12   0
  -8   1  -1  675.77    6.03   0
  -8   3  -3    6.60    2.00   0
  -7   1  -2  202.41    3.05   0
  -7   5  -5   15.91    1.95   0
  -6  -2  11   15.20    2.03   0
  -6   4  -5  295.78    2.93   0
  -6   6  -6  204.18    2.45   0
  -5   8  -7   32.87    1.76   0
  -4  -3   6    0.22    1.43   0
  -4  -3   7  549.45    4.50   0
  -4  -2  11   16.54    1.57   0
  -4   1  -3 3078.44   10.71   0
  -4   2  -4  196.14    2.54   0
  -4   5  -6    8.67    1.07   0
  -4   8  -7  140.39    2.43   0
  -3  -2  11  138.36    2.56   0
  -3   1  -3    5.76    1.13   0
  -3   2  -4  303.35    3.17   0
  -3   5  -6   37.51    1.31   0
  -3   8  -7  178.37    2.50   0
  -2  -2  10  578.00    3.86   0
  -2   8  -7   94.00    1.76   0
  -1  -2   4    2.74    0.92   0
  -1  -2   8  210.41    2.50   0
  -1  -1  11   66.94    1.75   0
  -1   0  13   -0.93    1.74   0
  -1   6  -6   93.63    1.73   0
  -1   9  -7   11.04    1.22   0
  -1  10  -7    2.22    1.83   0
   0  -1  10    4.44    1.49   0
   0   0  12   83.64    1.91   0
   0   5  -5  730.67    4.47   0
   0   7  -6    3.54    0.94   0
   1   0  10    0.13    1.11   0
   1   1  12   87.99    2.01   0
   1  10  -6  237.34    2.78   0
   2   1  10   39.00    1.81   0
   2   9  -5   16.59    1.19   0
   3   2   9    6.44    1.59   0
   3   3  11   43.24    2.12   0
   3   7  -3  190.92    3.07   0
   3  10  -4    0.13    1.63   0
   4   4   2  212.55    4.60   0
   4   4   9  164.06    2.74   0
   5   6   7    9.85    1.49   0
  -9   0   2   -0.06    2.50   0
  -8  -2   6   78.59    3.05   0
  -8  -2   8    1.09    1.85   0
  -8   2  -2  275.04    3.44   0
  -8   5  -4    3.97    2.25   0
  -6   3  -4  209.78    2.73   0
  -6   7  -6   32.37    2.00   0
  -5  -3   5  121.95    2.70   0
  -5  -3   6    8.37    1.12   0
  -5  -3   7  236.53    3.04   0
  -5  -3   8   73.93    1.90   0
  -5  -3   9    9.17    1.68   0
  -5   4  -5   44.47    1.44   0
  -5   6  -6   26.32    1.40   0
  -5   9  -7    0.05    1.67   0
  -4  -3   5    7.02    1.29   0
  -4  -3   8    2.42    1.08   0
  -4  -3   9  130.15    2.46   0
  -4  -2  12   31.20    1.89   0
  -4   9  -7   38.41    1.71   0
  -3  -3   6 1517.53    7.12   0
  -3  -3   7   38.23    1.50   0
  -3  -3   8  235.11    2.88   0
  -3  -2  12   33.09    2.13   0
  -3   9  -7    4.24    1.71   0
  -2  -2  11   25.04    1.93   0
  -2  -1  13    0.09    1.86   0
  -2   4  -5   11.01    1.02   0
  -2   6  -6    6.36    1.01   0
  -2   9  -7   62.23    1.63   0
  -2  10  -7    5.55    1.92   0
  -1  -2   9   70.50    1.63   0
  -1  -1  12    0.04    1.41   0
  -1   3  -4  464.85    3.82   0
  -1   7  -6  117.55    2.06   0
  -1  11  -7    9.73    1.54   0
  -1  12  -7   54.80    2.05   0
   0  -1   2   69.13    2.86   0
   0   8  -6   95.05    1.82   0
   1  -1   5  195.49    2.79   0
   1  -1   6  288.24    2.99   0
   1  -1   7   99.18    1.79   0
   1   0  11  196.63    2.63   0
   1   5  -4  348.41    3.48   0
   1   7  -5  258.72    2.84   0
   1  11  -6   20.14    1.50   0
   2   0   5    1.31    1.22   0
   2   0   6   21.67    1.12   0
   2   0   7    1.48    0.90   0
   2   2  12   70.72    2.01   0
   2   5  -3  117.57    2.51   0
   2   7  -4  119.77    2.29   0
   2  10  -5   66.66    1.71   0
   2  11  -5   27.16    1.95   0
   2  12  -5   15.54    2.18   0
   2  13  -5   12.29    2.52   0
   3   2  10   22.55    1.75   0
   3  11  -4    1.03    1.32   0
   3  12  -4    7.82    1.97   0
   3  13  -4   96.01    2.47   0
   4   3   5   63.47    2.10   0
   4   3   6   83.19    1.86   0
   4   3   7  196.52    2.79   0
   4   4  10    8.40    2.10   0
   4   9  -2   72.36    2.43   0
   5   6   3   22.66    2.02   0
   5   6   8   83.21    2.20   0
  -7   4  -4  150.63    2.33   0
  -7   6  -5   63.75    1.93   0
  -6  -3   6   82.42    2.41   0
  -6  -3   7  448.32    4.39   0
  -6  -3   8   18.56    1.55   0
  -6  -3   9   23.36    2.01   0
  -6   0  -1    0.03    1.30   0
  -6   2  -3  139.57    2.47   0
  -6   5  -5    1.29    1.18   0
  -6   8  -6   72.89    2.32   0
  -5  -3  10   68.60    2.38   0
  -5   7  -6    0.79    1.78   0
  -4  -3  10   16.88    1.93   0
  -4   4  -5   87.53    1.68   0
  -4   6  -6   45.31    1.40   0
  -4  10  -7   67.88    2.11   0
  -3  -3   5   82.91    1.98   0
  -3  -3   9    0.42    1.10   0
  -3   4  -5    3.05    0.92   0
  -3   6  -6    1.82    0.93   0
  -3  10  -7    2.99    1.53   0
  -3  11  -7   67.49    2.08   0
  -2  -3   7  227.33    2.88   0
  -2  -2   2  124.12    3.50   0
  -2  -2  12   14.44    1.96   0
  -2  11  -7   76.55    1.94   0
  -1  -2   3 2769.24   11.73   0
  -1  -2  10   44.85    1.49   0
  -1  -1  13    0.67    2.14   0
  -1   2  -3 2401.54    9.49   0
  -1   5  -5  136.83    2.16   0
   0  -2   6   17.19    1.35   0
   0  -2   7   44.12    1.60   0
   0  -2   8  308.56    3.10   0
   0  -1  11  128.40    2.04   0
   0   0  13    0.57    1.73   0
   0   4  -4  254.84    2.86   0
   0   6  -5  125.02    1.98   0
   0   9  -6   18.99    1.20   0
   0  10  -6   88.04    2.07   0
   1  -1   4 4927.41   13.45   0
   1  -1   8  643.80    4.17   0
   1  -1   9   30.65    1.62   0
   1   1  13    6.14    1.86   0
   1   8  -5  554.67    4.00   0
   2   0   4  393.90    4.00   0
   2   0   8 1372.72    5.94   0
   2   0   9   -1.08    1.46   0
   2   1  11   59.51    1.70   0
   3   1   6  686.75    4.69   0
   3   1   7   44.78    1.79   0
   3   2   2  564.05    6.57   0
   3   3  12   17.48    1.94   0
   4   3   4  592.05    5.38   0
   4   3   8   81.67    1.85   0
   4   7  -1   27.25    1.97   0
   5   5   5   20.52    1.65   0
   5   5   6   11.58    1.67   0
   5   5   7    3.27    1.75   0
   5   6   9   51.19    2.13   0
   5  10   0   33.54    2.54   0
  -8  -2   5   93.54    3.81   0
  -8   4  -3    0.67    1.50   0
  -8   6  -4   81.00    2.60   0
  -7   3  -3  385.13    3.72   0
  -7   7  -5   64.70    2.02   0
  -6  -3  10    4.44    2.40   0
  -5  -3  11    9.37    2.29   0
  -5  -1   0  713.11    8.67   0
  -5   3  -4   74.40    1.67   0
  -5   5  -5   17.13    1.50   0
  -5   8  -6   86.81    2.22   0
  -4  -3   4 1268.09    8.38   0
  -4  -3  11   12.65    2.16   0
  -4   7  -6  153.76    2.07   0
  -3  -3  10  105.16    1.97   0
  -3   7  -6  173.14    2.12   0
  -2  -3   5  583.13    4.72   0
  -2  -3   6    5.23    1.06   0
  -2  -3   8  128.97    2.05   0
  -2  -3   9  108.34    1.89   0
  -2   3  -4  143.93    2.16   0
  -2   7  -6   38.96    1.32   0
  -1  -2  11  183.86    2.27   0
  -1   1  -2  458.36    5.14   0
  -1   8  -6  129.89    1.90   0
  -1   9  -6   61.80    1.86   0
   0  -2   5  292.02    3.15   0
   0  -2   9   -0.47    0.96   0
   0  -1  12   10.90    1.48   0
   0  11  -6    3.99    1.40   0
   0  12  -6    0.22    1.59   0
   1  -1  10  287.68    2.76   0
   1   0  12   -0.45    1.47   0
   1   4  -3   38.04    1.64   0
   1   9  -5    6.75    1.46   0
   2   0  10    2.51    1.57   0
   2   1  12   23.81    1.76   0
   2   4  -2 1843.87   10.25   0
   2   8  -4    0.40    1.19   0
   3   1   5   69.71    1.69   0
   3   1   8   42.53    1.43   0
   3   1   9  174.32    2.56   0
   3   2  11   35.70    1.72   0
   3   6  -2   28.13    1.63   0
   3   8  -3  118.83    2.31   0
   4   3   9    0.05    1.27   0
   4   3  10    2.65    1.85   0
   4   4  11    0.31    1.78   0
   4  10  -2  197.60    3.38   0
   4  11  -2    0.37    1.79   0
   4  12  -2   41.74    2.45   0
   5   5   8   16.48    1.59   0
   5   8   1  136.62    6.17   0
   5  11   0   -0.13    2.03   0
   5  12   0    8.67    2.56   0
   6   9   5   30.08    3.09   0
   6  10   4    3.82    3.57   0
  -7  -3   7   44.54    2.22   0
  -7  -3   8  115.47    2.98   0
  -7  -3   9   13.30    2.40   0
  -7   5  -4    1.65    1.31   0
  -6  -3   5    0.12    1.40   0
  -6   4  -4    5.28    1.08   0
  -6   6  -5   72.14    1.76   0
  -5  -3   4    0.29    1.24   0
  -5   2  -3 1643.52    7.31   0
  -5   9  -6    0.08    1.55   0
  -4  -3  12    1.81    2.46   0
  -4   3  -4  576.21    4.05   0
  -4   5  -5   58.79    1.41   0
  -4   8  -6    0.93    1.23   0
  -3  -3   4   70.77    1.97   0
  -3  -3  11   96.72    1.98   0
  -3   3  -4  222.96    2.59   0
  -3   5  -5  109.12    1.81   0
  -3   8  -6    1.45    1.11   0
  -2  -3  10    3.97    1.24   0
  -2  -2  13    1.29    1.81   0
  -2   5  -5   35.61    1.24   0
  -2   8  -6    1.02    1.06   0
  -2   9  -6  515.65    3.63   0
  -1  -3   7    2.09    1.29   0
  -1  -3   8   63.16    1.91   0
  -1  -2  12    4.14    1.44   0
  -1   6  -5  132.40    2.04   0
  -1  10  -6   69.36    1.65   0
  -1  11  -6   85.26    2.12   0
  -1  12  -6   23.98    2.05   0
   0  -2   4  150.69    2.68   0
   0  -2  10  112.21    1.91   0
   0  -1  13   17.28    1.84   0
   0   3  -3  523.88    4.51   0
   0   7  -5  126.87    1.97   0
   1  -1  11    8.33    1.30   0
   1   0  13    6.79    1.86   0
   1   6  -4  227.06    2.74   0
   1  10  -5  174.19    2.26   0
   1  11  -5   12.85    1.83   0
   1  12  -5   54.93    2.24   0
   1  13  -5    4.67    1.75   0
   2   0  11    0.35    1.82   0
   2   9  -4   -0.86    1.39   0
   3   1   4  426.67    4.22   0
   3   1  10   67.68    1.70   0
   3   2  12   46.06    2.05   0
   3   9  -3   98.94    2.36   0
   4   2   7    6.44    1.37   0
   4   3   3  623.16    6.19   0
   5   5   4   51.22    2.16   0
   5   5   9   41.79    1.98   0
  -9   1   1   29.27    2.43   0
  -9   2   0   16.84    2.24   0
  -9   3  -1   72.58    2.39   0
  -8   0   1   -0.05    1.66   0
  -7  -3   6    1.74    1.64   0
  -7   0   0    0.54    1.28   0
  -7   1  -1    5.55    1.42   0
  -7   6  -4    5.00    1.95   0
  -6   7  -5  137.46    2.11   0
  -5   4  -4  128.75    2.16   0
  -5   6  -5  130.70    1.94   0
  -4   2  -3  319.01    3.37   0
  -4   9  -6  275.31    2.59   0
  -4  10  -6    1.77    1.46   0
  -4  11  -6  225.16    2.95   0
  -3  -3  12   45.66    1.94   0
  -3   9  -6   73.73    1.68   0
  -3  10  -6   13.93    1.46   0
  -3  11  -6   -0.37    2.14   0
  -2  -3   4  455.64    4.45   0
  -2  -3  11  291.33    2.86   0
  -2   2  -3  388.71    3.74   0
  -2   6  -5  113.22    1.92   0
  -2  10  -6   -0.31    1.23   0
  -2  11  -6   35.34    1.68   0
  -2  12  -6   21.76    1.84   0
  -1  -3   6  122.57    2.06   0
  -1  -3   9  348.98    3.05   0
  -1  -3  10  257.48    2.92   0
  -1  -2  13    0.07    1.81   0
  -1   4  -4  321.12    3.06   0
   0  -2  11    1.37    1.25   0
   0   5  -4  135.93    2.10   0
   0   8  -5  288.89    2.75   0
   1  -2   7   10.32    1.28   0
   1  -2   8    1.28    1.34   0
   1  -1   3  211.70    3.20   0
   1  -1  12   87.67    1.96   0
   2  -1   7    4.63    1.25   0
   2  -1   8  236.04    2.79   0
   2   0   3    0.64    1.03   0
   2   0  12    1.74    2.17   0
   2   6  -3    1.38    0.85   0
   2  10  -4   41.00    1.52   0
   2  11  -4    1.14    1.63   0
   2  12  -4    4.41    1.75   0
   2  13  -4   13.21    1.76   0
   3   1  11  137.00    2.23   0
   3  10  -3   71.97    1.92   0
   3  11  -3  334.31    3.70   0
   3  12  -3  228.60    3.27   0
   3  13  -3    0.41    1.73   0
   4   2   5   73.61    2.06   0
   4   2   6  128.32    2.16   0
   4   2   8   78.18    1.79   0
   4   2   9  135.40    2.44   0
   4   3  11    3.07    1.76   0
   5   4   6  349.18    3.88   0
   5   4   7  267.09    3.42   0
   5   4   8    9.90    1.93   0
   6   8   6   60.71    3.41   0
  -8   1   0  131.32    2.97   0
  -8   2  -1   61.65    1.93   0
  -7   4  -3    0.93    1.20   0
  -6   3  -3  142.09    2.18   0
  -6   5  -4    1.99    1.08   0
  -6   8  -5   -0.90    1.51   0
  -6   9  -5   20.52    2.14   0
  -5  -4   8   52.08    1.97   0
  -5  -4   9    9.54    1.75   0
  -5   0  -1    1.43    0.78   0
  -5   7  -5    2.51    1.14   0
  -4  -4   7   98.81    2.25   0
  -4  -4   8  117.60    2.12   0
  -4  -4   9   15.76    1.38   0
  -4  -4  10  173.26    2.68   0
  -4   4  -4   13.01    1.29   0
  -4   6  -5  123.11    1.89   0
  -3  -4   8  357.01    3.49   0
  -3  -4   9   14.66    1.63   0
  -3   2  -3  448.18    3.84   0
  -3   6  -5  672.33    3.89   0
  -2  -3  12  147.54    2.30   0
  -2   1  -2  280.43    3.73   0
  -2   4  -4  985.17    5.15   0
  -1  -3   5    1.03    0.90   0
  -1  -3  11    0.51    1.27   0
  -1   7  -5  479.49    3.45   0
   0  -2  12   40.07    1.74   0
   0   2  -2  210.20    3.54   0
   0   9  -5  200.32    2.31   0
   0  10  -5   29.73    1.70   0
   0  11  -5    0.26    1.72   0
   0  12  -5    0.11    1.97   0
   0  13  -5   -0.04    1.72   0
   1  -2   6    2.41    0.86   0
   1  -2   9  368.55    3.05   0
   1  -2  10   73.28    1.97   0
   1  -1  13    1.90    2.44   0
   1   3  -2  836.46    6.76   0
   1   7  -4  602.70    4.16   0
   2  -1   6   32.81    1.28   0
   2  -1   9 1075.70    5.11   0
   2  -1  10   40.45    1.43   0
   2   3  -1 1312.51   11.73   0
   3   0   6   -0.62    1.24   0
   3   0   7  224.90    2.61   0
   3   0   8    0.33    0.97   0
   3   0   9  591.89    4.10   0
   3   1   3    6.07    1.18   0
   3   1  12  220.02    2.74   0
   4   2  10  170.56    2.42   0
   4   8  -1  418.27    5.35   0
   5   4   5   50.14    1.98   0
   5   4   9   43.81    1.81   0
   5   4  10   -0.50    2.23   0
   6   7   7   56.29    2.59   0
   6   8   5    0.03    2.10   0
   6   9   4   72.96    4.00   0
  -8   4  -2    1.35    1.73   0
  -8   6  -3    0.05    1.63   0
  -7   7  -4   17.38    1.62   0
  -7   8  -4    5.57    2.32   0
  -6   6  -4   24.11    1.78   0
  -5  -4   7  284.83    3.34   0
  -5  -4  10  198.98    2.79   0
  -5  -4  11   20.17    2.48   0
  -5   5  -4   46.52    1.64   0
  -5   8  -5   32.96    1.50   0
  -5   9  -5   21.75    2.03   0
  -4  -4   6  344.21    3.78   0
  -4  -4  11  230.22    2.85   0
  -4  -1   0    8.87    1.33   0
  -4   1  -2   19.49    1.14   0
  -4   7  -5   63.53    1.49   0
  -3  -4   7   28.34    1.31   0
  -3  -4  10    2.19    1.20   0
  -3  -4  11  361.94    3.56   0
  -3   1  -2   80.13    2.08   0
  -3   4  -4   73.42    1.52   0
  -3   7  -5    6.97    0.97   0
  -2  -4   8  136.09    2.31   0
  -2  -4   9    0.25    1.49   0
  -2   7  -5  420.39    3.13   0
  -1  -3  12    0.56    1.54   0
  -1   3  -3  876.18    5.48   0
  -1   5  -4   13.40    1.15   0
  -1   8  -5   75.66    1.51   0
  -1   9  -5  422.02    3.28   0
  -1  13  -5    0.11    2.12   0
   0  -3   7   38.24    1.29   0
   0  -3   8    9.87    1.08   0
   0  -3   9  395.16    3.18   0
   0  -3  10    6.97    1.19   0
   0  -2   3 1045.95    6.85   0
   0  -2  13   39.58    2.06   0
   0   6  -4 1083.80    5.38   0
   1  -2   5 1912.75    7.60   0
   1  -2  11    2.30    1.31   0
   1   5  -3  300.25    3.36   0
   1   8  -4  185.66    2.35   0
   2  -1   5   18.29    1.13   0
   2  -1  11   59.14    1.71   0
   2   1   1 2588.62   17.46   0
   2   7  -3  165.45    2.46   0
   3   0   5  308.63    3.32   0
   3   0  10    0.49    1.24   0
   3   0  11   31.14    1.95   0
   3   5  -1  235.75    4.47   0
   3   7  -2    7.59    1.02   0
   4   2   4  205.64    3.17   0
   4   2  11    7.48    1.69   0
   5   5   3   24.87    1.90   0
   6   7   6   40.18    2.49   0
  -7   3  -2  597.60    4.43   0
  -7   5  -3  178.08    2.38   0
  -6  -4   8   12.49    1.47   0
  -6  -4   9    9.77    1.63   0
  -6  -4  10   10.94    1.79   0
  -6  -3   4   50.15    2.47   0
  -6   2  -2  339.15    3.42   0
  -6   4  -3   17.86    1.50   0
  -6   7  -4   13.79    1.81   0
  -5  -4   6  160.45    2.99   0
  -5   3  -3  526.25    3.97   0
  -5  10  -5   10.69    1.65   0
  -4  -4  12  127.24    2.50   0
  -4  -3   3  512.14    6.29   0
  -4   0  -1    0.21    0.72   0
  -4   5  -4  432.68    3.40   0
  -4   8  -5    0.20    1.07   0
  -4   9  -5    2.00    1.22   0
  -4  10  -5   33.99    2.07   0
  -4  11  -5    0.01    2.08   0
  -3  -4   6   -0.16    0.86   0
  -3  -4  12   12.65    1.74   0
  -3  -3   3   51.92    1.92   0
  -3  -1   0  189.37    5.77   0
  -3   8  -5   -0.53    1.10   0
  -3   9  -5   30.47    1.72   0
  -2  -4   7   10.21    1.15   0
  -2  -4  10  127.04    2.06   0
  -2  -4  11   96.44    1.94   0
  -2   5  -4   37.08    1.45   0
  -2   8  -5  410.97    3.09   0
  -2   9  -5   22.48    1.54   0
  -2  10  -5  369.98    3.12   0
  -2  12  -5  204.29    2.87   0
  -1  -3   4   61.00    1.68   0
  -1  -3  13    3.07    1.82   0
  -1  -2   2 2088.59   11.70   0
  -1  10  -5   52.08    1.47   0
  -1  11  -5   90.34    1.85   0
  -1  12  -5  180.25    2.34   0
   0  -3   6  515.22    3.77   0
   0  -3  11    0.14    1.37   0
   0  -3  12   -0.34    1.91   0
   0   1  -1 1162.36   10.86   0
   0   4  -3   14.28    1.01   0
   1  -2  12    0.13    1.48   0
   1   9  -4  166.61    2.23   0
   1  10  -4  177.12    2.55   0
   1  11  -4    6.28    1.67   0
   1  12  -4   23.55    1.51   0
   1  13  -4   12.50    1.66   0
   2  -1   4  338.04    3.57   0
   2  -1  12   31.89    1.76   0
   2   8  -3  269.02    3.14   0
   3   0  12   -1.23    2.33   0
   4   1   6  580.28    4.38   0
   4   1   7  479.20    3.81   0
   4   1   8   84.81    1.84   0
   4   1   9   78.32    1.84   0
   4   1  10    0.07    1.86   0
   4   6   0  464.78    7.85   0
   4   9  -1   23.00    1.73   0
   4  10  -1  206.44    3.52   0
   4  12  -1   97.91    2.86   0
   5   3   6   68.23    2.02   0
   5   3   7    0.40    1.13   0
   5   3   8   77.20    1.93   0
   5   3   9   66.53    1.93   0
   5   3  10    7.86    2.08   0
   5   4   4  125.81    2.87   0
   6   6   7    0.20    1.93   0
   6   6   8   -0.32    2.39   0
   6   7   5  141.31    3.73   0
  -9   3   0  113.57    2.80   0
  -8  -3   7   24.39    2.56   0
  -8   5  -2   39.97    2.04   0
  -7  -3   5  276.85    5.11   0
  -7   6  -3    3.02    1.77   0
  -6  -4   7  218.84    3.19   0
  -6   1  -1   32.95    1.66   0
  -6   8  -4    8.58    1.73   0
  -5   6  -4   21.93    1.17   0
  -4  -4   5   76.99    2.12   0
  -4   3  -3  599.80    4.19   0
  -3  -4   5   26.96    1.46   0
  -3   3  -3  798.76    4.88   0
  -3   5  -4  997.64    4.89   0
  -3  10  -5    7.73    1.25   0
  -3  11  -5   -0.33    1.44   0
  -3  12  -5    5.75    1.68   0
  -2  -4   6  411.87    3.56   0
  -2  -4  12    0.56    1.61   0
  -2  -3   3  198.16    3.32   0
  -2   3  -3    2.90    0.80   0
  -2  11  -5   25.57    1.50   0
  -1  -4   7   50.20    1.68   0
  -1  -4   8  341.27    2.98   0
  -1  -4   9  300.60    2.83   0
  -1  -4  10   45.70    1.50   0
  -1  -4  11   73.47    2.23   0
  -1   6  -4   52.42    1.38   0
   0  -3   5 1919.15    7.63   0
   0  -3  13   16.44    2.35   0
   0   7  -4  105.11    1.81   0
   0  13  -4  214.76    2.95   0
   1  -3   8  371.08    3.22   0
   1  -3   9   93.05    2.03   0
   1  -3  10  137.86    2.22   0
   1  -2   4  120.31    2.19   0
   1  -2  13   98.06    2.28   0
   2  -2   7  316.41    2.84   0
   2  -2   8  689.55    4.14   0
   2  -2   9   15.96    1.19   0
   2  -2  10   17.39    1.35   0
   2   5  -2    0.51    0.80   0
   2   9  -3   33.22    1.54   0
   2  12  -3  142.43    2.60   0
   2  13  -3    6.12    1.64   0
   3  -1   8   43.31    1.70   0
   3  -1   9  178.53    2.49   0
   3   0   4   -0.14    1.05   0
   3   8  -2  144.83    2.54   0
   3  12  -2  106.01    2.59   0
   3  13  -2  103.21    2.39   0
   4   1  11   10.21    1.65   0
   4  11  -1   42.81    1.82   0
   5   6   2   74.34    4.71   0
   5  12   1    0.05    2.36   0
   6   6   6  203.23    3.65   0
   6   8   4    8.84    2.66   0
  -9   2   1   43.45    2.39   0
  -8   6  -2   11.99    2.23   0
  -7  -4   9   64.45    2.90   0
  -7   4  -2  322.64    3.30   0
  -7   7  -3   42.48    2.16   0
  -6  -1   1  390.78    6.40   0
  -6   0   0  585.64    5.93   0
  -6   5  -3  126.01    2.17   0
  -6   9  -4   70.51    1.91   0
  -6  10  -4    2.91    1.73   0
  -5   2  -2   18.12    1.11   0
  -5   4  -3  294.56    2.95   0
  -5   7  -4   11.95    1.18   0
  -4   6  -4    0.01    0.86   0
  -3   6  -4  235.98    2.63   0
  -2  -4   5  350.05    3.62   0
  -2   6  -4 1392.50    5.62   0
  -1  -4   6   54.98    1.61   0
  -1  -4  12    5.19    1.65   0
  -1   2  -2 1527.30    8.28   0
  -1   7  -4   94.33    1.82   0
   0  -4   9    2.45    1.38   0
   0   8  -4   58.11    1.49   0
   0   9  -4  230.57    2.60   0
   0  10  -4   81.60    2.00   0
   0  11  -4  160.32    2.40   0
   0  12  -4   88.49    1.86   0
   1  -3   7    5.62    0.99   0
   1  -3  11  114.47    2.03   0
   1  -3  12    0.63    1.95   0
   1  -1   2  472.72    5.36   0
   1   2  -1  154.93    4.06   0
   1   6  -3  451.15    3.82   0
   2  -2   6    0.60    0.79   0
   2  -2  11   -0.37    1.36   0
   2  -2  12   54.05    2.52   0
   2   0   2 2744.76   12.61   0
   2  10  -3  593.61    4.23   0
   2  11  -3   10.17    1.25   0
   3  -1   6  659.25    4.38   0
   3  -1   7   45.01    1.39   0
   3  -1  10   60.45    1.62   0
   3  -1  11  134.46    2.20   0
   3   9  -2  124.73    2.29   0
   3  10  -2  559.96    4.68   0
   3  11  -2   89.84    2.04   0
   4   0   9    0.91    1.51   0
   4   1   5   41.30    1.42   0
   4   3   2   82.99    2.98   0
   5   2   8   64.73    2.06   0
   5   2   9    0.91    1.89   0
   5   3   5  152.30    2.79   0
   5   9   1   25.62    2.31   0
   5  10   1   18.23    2.37   0
   5  11   1    4.10    2.06   0
   6   5   7   46.11    2.24   0
   6   5   8    0.01    2.17   0
  -9   0   3    6.91    2.43   0
  -9   1   2  125.88    3.30   0
  -8   2   0  280.11    3.42   0
  -8   4  -1   19.56    1.89   0
  -8   7  -2   28.30    2.48   0
  -7  -4   8   18.54    1.77   0
  -7   8  -3    0.23    1.56   0
  -7   9  -3    4.60    2.18   0
  -6  -4   6  129.17    2.73   0
  -6   3  -2    3.49    0.96   0
  -6   6  -3   21.58    1.60   0
  -5  -5   9    1.93    1.71   0
  -5  -5  10   12.33    2.17   0
  -5  -5  11   70.91    2.62   0
  -5  -4   5   27.23    1.68   0
  -5  -3   3  221.64    5.14   0
  -5   8  -4  101.27    1.76   0
  -5   9  -4   15.72    1.39   0
  -5  10  -4   93.82    1.89   0
  -5  11  -4   34.77    1.95   0
  -4  -5   8  135.47    2.51   0
  -4  -5   9   19.11    1.40   0
  -4  -5  10   37.80    1.75   0
  -4  -5  11   98.57    2.23   0
  -4   7  -4  201.54    2.24   0
  -4  12  -4   16.75    2.34   0
  -3  -5   8   35.96    1.68   0
  -3  -5   9    2.47    1.16   0
  -3  -5  10   17.34    1.47   0
  -3  -5  11    1.28    1.53   0
  -3  -5  12    0.56    2.22   0
  -3   7  -4  846.92    4.49   0
  -2  -5   9   49.91    1.86   0
  -2  -5  10   47.37    1.92   0
  -2   7  -4   55.95    1.73   0
  -2  13  -4   -3.49    2.10   0
  -1   4  -3   80.55    1.71   0
  -1   8  -4  192.65    2.34   0
  -1  12  -4   -0.33    1.67   0
  -1  13  -4   52.23    1.86   0
   0  -4   7  198.64    2.47   0
   0  -4   8   76.07    1.62   0
   0  -4  10  670.11    4.06   0
   0  -4  11    1.05    1.40   0
   0  -4  12    8.01    1.98   0
   0  -3   4   87.25    1.96   0
   0   5  -3  318.31    3.16   0
   1  -3   6    0.94    0.78   0
   1   7  -3   86.91    1.93   0
   1  13  -3   67.98    2.31   0
   3  -1  12  162.92    3.07   0
   4   0   7   -0.43    0.99   0
   4   0   8  864.52    4.80   0
   4   0  10    1.44    1.37   0
   4   0  11    0.18    1.64   0
   4   2   3  318.00    4.09   0
   5   2   7  571.39    4.26   0
   5   2  10   31.00    1.83   0
   6   6   5   73.00    2.62   0
  -8   1   1   42.23    2.10   0
  -7  -4   7   21.80    2.17   0
  -7   1   0  102.77    2.27   0
  -7   5  -2   91.47    1.86   0
  -6  -5  10    0.57    2.21   0
  -6   7  -3  406.78    3.31   0
  -5  -5   8  133.78    2.35   0
  -5   5  -3   24.03    1.14   0
  -4  -5   7  736.01    5.13   0
  -4   2  -2  965.93    5.76   0
  -4   4  -3   45.65    1.34   0
  -4   8  -4   28.25    1.21   0
  -4   9  -4    3.34    1.11   0
  -4  10  -4   86.77    1.72   0
  -4  11  -4    0.35    1.45   0
  -3  -5   7  560.34    4.07   0
  -3   4  -3  489.62    3.74   0
  -3   8  -4  497.97    3.32   0
  -3   9  -4  165.45    2.22   0
  -3  10  -4    1.69    1.56   0
  -3  11  -4    4.14    1.63   0
  -3  12  -4    0.69    1.56   0
  -2  -5   8    4.82    1.02   0
  -2  -5  11   11.57    1.51   0
  -2  -5  12    0.95    1.68   0
  -2   2  -2  284.83    3.45   0
  -2   4  -3 1572.62    6.61   0
  -2   8  -4   92.10    1.63   0
  -2   9  -4  102.37    2.00   0
  -2  10  -4   47.87    1.67   0
  -2  11  -4  112.99    1.88   0
  -2  12  -4    4.71    1.47   0
  -1  -5   9  110.61    2.07   0
  -1  -5  10  340.35    3.25   0
  -1  -4   5  870.78    5.06   0
  -1  -3   3  229.51    3.21   0
  -1   9  -4   58.69    1.40   0
  -1  10  -4    0.25    1.03   0
  -1  11  -4  119.43    1.92   0
   0  -4   6    8.29    1.21   0
   0  -1   1 1166.03   10.83   0
   0   3  -2 1786.51    8.81   0
   1  -3   5   87.25    1.93   0
   1   4  -2 2373.06   10.16   0
   1   8  -3   61.71    1.71   0
   1  11  -3   11.71    1.59   0
   1  12  -3    1.21    1.30   0
   2  -3   8  218.53    2.56   0
   2  -3   9  476.05    3.37   0
   2  -3  10   33.24    1.39   0
   2  -3  11   54.41    2.15   0
   2  -2   5  156.00    2.22   0
   2  -1   3  252.16    3.25   0
   2   6  -2  609.08    4.98   0
   2  13  -2   17.28    2.15   0
   3  -2   8    2.77    1.37   0
   3  -2   9    4.86    1.53   0
   3  -2  10   22.70    1.83   0
   3  -1   5   68.29    1.59   0
   3   1   2   85.12    2.53   0
   3   6  -1   93.15    2.53   0
   4   0   6   17.42    1.14   0
   4   1   4  446.79    4.26   0
   4  13   0    1.33    2.19   0
   5   2   6   90.87    1.96   0
   6   4   8    2.01    2.09   0
   6   4   9   74.94    2.26   0
   6   5   6  186.98    3.13   0
  -9   5   0  200.19    3.28   0
  -8  -3   6   26.56    2.84   0
  -8  -1   3  155.90    4.86   0
  -8   5  -1   47.54    2.05   0
  -7   0   1   69.77    2.40   0
  -7   3  -1  542.56    4.24   0
  -7   6  -2    9.68    1.72   0
  -6  -5   9    4.90    2.14   0
  -6   4  -2  330.69    3.22   0
  -6   8  -3  235.33    2.47   0
  -6   9  -3   72.80    1.85   0
  -6  10  -3   96.18    2.05   0
  -5  -5   7  102.48    2.42   0
  -5   3  -2  632.13    4.41   0
  -5   6  -3   19.29    1.39   0
  -4  -4   4   12.38    1.36   0
  -4   5  -3  316.08    2.99   0
  -3  -4   4   96.25    2.14   0
  -3   2  -2  537.90    4.43   0
  -2  -5   7   19.41    1.14   0
  -2  -4   4   39.72    1.57   0
  -1  -5   8   -0.10    0.94   0
  -1  -5  11    0.52    1.42   0
  -1  -5  12    3.16    1.67   0
  -1   5  -3  604.27    4.08   0
   0   6  -3  282.44    2.86   0
   0  13  -3   34.64    1.66   0
   1  -4   8    1.25    0.88   0
   1  -4   9  408.65    3.14   0
   1  -4  10  443.51    3.28   0
   1  -4  11   -2.43    1.45   0
   1  -4  12    1.50    2.16   0
   1  -2   3 2346.59    9.41   0
   1   9  -3   55.49    1.46   0
   1  10  -3    7.33    1.05   0
   2  -3   7   35.13    1.29   0
   2  -3  12   -0.96    1.68   0
   2  12  -2    0.33    1.73   0
   3  -2   7   -0.06    0.90   0
   3  -2  11   40.83    1.71   0
   3  -2  12   47.50    1.97   0
   3   0   3  203.52    3.05   0
   3  13  -1   13.16    1.71   0
   4  -1   9   83.08    2.11   0
   4  -1  10    0.16    1.80   0
   4  -1  11   11.19    2.05   0
   4   7   0  200.70    4.16   0
   4  12   0   23.32    2.20   0
   5   1   8  631.27    4.33   0
   5   1   9    6.60    1.39   0
   5   1  10    0.16    1.59   0
   5   3   4   72.84    2.22   0
   5   4   3  289.06    4.76   0
   6   4   7   97.16    2.27   0
   6   7   4   15.42    2.48   0
  -9   3   1   64.85    2.14   0
  -8   0   2    0.80    1.47   0
  -8   6  -1    0.02    1.98   0
  -7  -1   2  366.32    6.34   0
  -7   7  -2    5.90    1.36   0
  -7   8  -2    1.07    1.94   0
  -6  -5   8   18.61    2.08   0
  -5   7  -3  457.57    3.21   0
  -5   8  -3   22.67    1.58   0
  -5  11  -3  110.87    2.48   0
  -4  -5   6    1.02    1.26   0
  -3  -5   6   57.74    1.59   0
  -3   5  -3    8.84    0.91   0
  -2  -5   6   14.81    1.32   0
  -2   5  -3 1586.72    6.39   0
  -1  -5   7  136.59    2.06   0
  -1  13  -3   45.36    1.77   0
   0  -5   9  295.45    2.72   0
   0  -5  10   60.15    1.62   0
   0  -5  11   72.40    1.86   0
   0  -5  12    0.23    2.28   0
   0  -4   5 1528.55    6.66   0
   0  -2   2  219.94    3.60   0
   0   7  -3  159.24    2.07   0
   0  11  -3   57.48    1.82   0
   0  12  -3  111.24    2.01   0
   1  -4   7  320.00    2.84   0
   1  14  -2   49.84    1.97   0
   2  -3   6  565.12    3.86   0
   2  -2   4 2435.19    8.59   0
   2   7  -2  300.93    3.32   0
   2   8  -2  700.22    4.90   0
   2  11  -2  292.82    3.17   0
   3  -2   6   36.78    1.54   0
   3   2   1 1704.51   15.24   0
   3  12  -1   39.08    1.97   0
   4  -1   7  491.50    3.80   0
   4  -1   8   90.37    1.82   0
   4   0   5   -0.84    0.79   0
   4  11   0   78.24    2.52   0
   5   1   7  177.74    2.48   0
   5   2   5   29.55    1.42   0
   6   3   8   -0.46    2.01   0
   6   3   9    2.31    1.67   0
   6   4   6  253.65    3.66   0
   6   5   5    1.56    1.61   0
  -8   7  -1   15.20    1.65   0
  -7   4  -1  116.41    2.20   0
  -7   9  -2   57.47    1.93   0
  -6  -4   5  124.44    3.19   0
  -6   5  -2    3.86    1.00   0
  -5   0   0    0.08    0.98   0
  -5   4  -2  558.73    3.99   0
  -5   9  -3  217.84    2.36   0
  -5  10  -3   46.26    1.61   0
  -4  -6   9    2.38    1.83   0
  -4  -6  10   33.14    1.75   0
  -4  -6  11    0.20    1.78   0
  -4   3  -2   84.43    1.69   0
  -4   6  -3   26.11    1.09   0
  -4   7  -3    3.25    1.23   0
  -4  11  -3   75.33    2.02   0
  -4  12  -3    1.88    1.52   0
  -3  -6   9   30.70    1.45   0
  -3  -6  10   -0.51    1.39   0
  -3  -6  11  247.14    2.89   0
  -3   6  -3 1207.33    5.36   0
  -3  12  -3    0.23    1.77   0
  -3  13  -3    0.40    1.69   0
  -2  -6   9  312.12    3.12   0
  -2  -6  10   69.94    1.81   0
  -2  -6  11   28.01    1.69   0
  -2  -6  12    0.82    2.48   0
  -2   6  -3   96.56    1.84   0
  -2  12  -3   26.12    1.89   0
  -2  13  -3    0.52    1.55   0
  -1  -5   6 1306.49    6.08   0
  -1  -4   4   90.26    1.98   0
  -1   1  -1  204.70    4.05   0
  -1   3  -2 2235.68    9.06   0
  -1   6  -3   14.62    0.89   0
  -1  11  -3    0.53    1.52   0
  -1  12  -3  141.92    2.06   0
   0  -5   8   28.81    1.22   0
   0  -3   3  533.45    4.61   0
   0   8  -3  714.26    4.23   0
   0   9  -3   23.78    1.14   0
   0  10  -3  568.02    3.71   0
   1  -4   6  636.75    4.05   0
   1  -3   4  489.82    3.90   0
   1   5  -2  315.67    3.49   0
   1  13  -2    1.83    1.44   0
   2  -4   9    0.18    1.48   0
   2  -4  10    3.34    1.30   0
   2  -4  11   16.32    1.60   0
   2  -4  12    0.23    2.19   0
   2   4  -1  243.56    4.22   0
   2   9  -2  252.60    2.86   0
   2  10  -2    1.88    1.03   0
   3  -3   9    0.52    1.54   0
   3  -3  10   46.62    1.59   0
   3  -3  11   48.57    1.75   0
   3  -3  12   14.97    2.30   0
   3  -1   4  432.92    3.80   0
   3   7  -1   31.33    1.42   0
   3  11  -1    1.91    1.24   0
   4   8   0   47.10    2.12   0
   4   9   0  146.20    3.07   0
   4  10   0   -0.01    1.56   0
   5   0   9   13.52    1.43   0
   5   0  10    0.04    1.57   0
   5   1   6  785.27    5.05   0
   6   3   7  285.28    3.59   0
  -9   2   2   -0.03    1.81   0
  -8   4   0  150.12    2.58   0
  -7  -4   6   13.71    2.01   0
  -7   5  -1    6.69    1.61   0
  -6  -5   7    0.05    1.71   0
  -6   3  -1  943.05    5.50   0
  -6   6  -2  854.01    4.56   0
  -6   7  -2   -1.04    1.60   0
  -5  -6   9    9.14    2.07   0
  -5  -6  10   50.24    2.03   0
  -5  -5   6  128.24    2.50   0
  -5  -4   4  274.95    4.60   0
  -4  -6   8  240.40    3.07   0
  -4   8  -3   44.40    1.28   0
  -4   9  -3    8.95    1.09   0
  -4  10  -3    5.42    1.18   0
  -3  -6   8   62.70    1.65   0
  -3  -5   5   72.88    1.87   0
  -3   3  -2  268.82    2.99   0
  -3   7  -3   57.04    1.44   0
  -3   8  -3  267.85    2.64   0
  -3   9  -3  447.64    3.23   0
  -3  10  -3  188.93    2.29   0
  -3  11  -3  169.81    2.08   0
  -2  -6   8  331.50    3.19   0
  -2   3  -2  176.42    2.57   0
  -2   7  -3 1742.79    6.17   0
  -2  10  -3    1.16    1.35   0
  -2  11  -3   24.28    1.28   0
  -1  -6   9    2.84    1.58   0
  -1  -6  10   94.12    1.94   0
  -1  -6  11   26.36    1.65   0
  -1  -6  12    0.03    1.80   0
  -1   7  -3  106.75    1.75   0
  -1   8  -3  122.41    1.85   0
  -1   9  -3  126.35    1.79   0
  -1  10  -3   35.07    1.22   0
  -1  14  -2   53.80    2.49   0
   0  -5   7   38.38    1.34   0
   0   4  -2  152.62    2.48   0
   0  14  -2  116.57    2.30   0
   1  -5   9   81.17    1.66   0
   1  -5  10   -0.04    1.26   0
   1  -5  11   47.22    1.75   0
   1  -5  12   -0.93    1.78   0
   1  12  -2   10.31    1.34   0
   2  -4   8  100.88    1.72   0
   2  -3   5   25.72    1.07   0
   2  13  -1   15.98    2.04   0
   3  -3   8  278.95    2.70   0
   3  -2   5  464.64    3.71   0
   3   8  -1   87.52    2.06   0
   3   9  -1   30.59    1.36   0
   3  10  -1    0.01    0.99   0
   4  -2   8   79.85    1.88   0
   4  -2   9  139.64    2.08   0
   4  -2  10  165.03    2.31   0
   4  -2  11    5.68    1.68   0
   4  -1   6  588.35    4.06   0
   4   1   3 3117.50   12.00   0
   5   0   7  895.06    5.14   0
   5   0   8   -0.16    1.23   0
   6   2   8    0.11    1.73   0
   6   2   9   -0.24    1.64   0
   6   6   4   31.84    2.52   0
  -9   5   1   43.90    2.53   0
  -8   2   1  171.38    2.74   0
  -8   5   0  211.63    2.93   0
  -7  -5   8  128.50    3.14   0
  -7   6  -1   52.43    1.97   0
  -6   1   0    0.29    0.86   0
  -6   8  -2  284.07    2.68   0
  -6   9  -2    9.76    1.39   0
  -6  10  -2   19.61    1.63   0
  -5   2  -1   77.43    1.78   0
  -5   5  -2  235.26    2.50   0
  -4  -5   5   45.06    1.83   0
  -4   4  -2  222.74    2.64   0
  -3  -6   7   30.79    1.66   0
  -2  -6   7   16.70    1.34   0
  -2  -5   5  122.12    2.11   0
  -2   8  -3  123.71    1.78   0
  -2   9  -3    4.03    0.92   0
  -1  -6   8  138.32    1.99   0
   0  -6  10  314.44    3.16   0
   0  -6  11   28.02    1.66   0
   0  -6  12    0.25    2.38   0
   0  -5   6  640.56    3.94   0
   0  -4   4  266.33    2.95   0
   0  13  -2    7.38    1.47   0
   1  -5   8    8.20    1.01   0
   1  -4   5  110.48    1.95   0
   1   6  -2   24.00    1.12   0
   1  10  -2    0.33    1.31   0
   1  11  -2   40.67    1.43   0
   1  14  -1    0.35    2.33   0
   2  -4   7  242.16    2.45   0
   2   2   0  473.09   16.49   0
   3  -3   7  211.66    2.33   0
   3  13   0   30.01    2.16   0
   4  -2   7    6.95    1.43   0
   4   0   4  329.64    3.44   0
   5  -1  10    0.26    2.15   0
   5   1   5   53.65    1.77   0
   5   2   4   38.12    1.77   0
   5  11   2   66.92    3.11   0
   6   2   7   46.78    1.98   0
   6   3   6  243.27    3.24   0
   6   4   5  307.73    4.15   0
  -9   1   3    1.42    2.01   0
  -8   6   0    0.98    1.77   0
  -7   3   0  121.62    2.36   0
  -7   7  -1   16.53    1.39   0
  -7   8  -1   64.23    1.82   0
  -7   9  -1  160.45    2.34   0
  -6  -6   9    6.23    2.10   0
  -6   4  -1  109.97    2.07   0
  -5  -6   8   -0.44    1.30   0
  -5   6  -2   68.44    1.49   0
  -5   7  -2  137.97    2.13   0
  -5   8  -2    0.30    1.42   0
  -5   9  -2  111.26    2.02   0
  -5  10  -2   45.87    1.55   0
  -5  11  -2   63.32    1.81   0
  -4  -6   7   67.86    1.78   0
  -4  12  -2   14.88    1.61   0
  -3  -7  11   -0.06    2.45   0
  -3  -3   2  911.36    9.18   0
  -3   4  -2   38.33    1.43   0
  -3  13  -2    0.62    1.58   0
  -2  -3   2  405.79    5.24   0
  -2   1  -1 2556.72   11.96   0
  -2  13  -2   -0.21    1.50   0
  -1  -6   7   45.18    1.62   0
  -1  -5   5   70.40    1.64   0
  -1   4  -2  637.72    4.56   0
  -1  13  -2  137.78    2.10   0
   0  -6   8  227.89    2.59   0
   0  -6   9   14.04    1.26   0
   0   5  -2  653.56    4.63   0
   0  12  -2  178.32    2.26   0
   1  -5   7   32.90    1.22   0
   1   7  -2  385.09    3.46   0
   1   8  -2   45.61    1.31   0
   1   9  -2   37.29    1.25   0
   2  -5   9   59.28    1.84   0
   2  -5  10   34.38    1.56   0
   2  -5  11  154.49    2.30   0
   2  -4   6  132.54    2.01   0
   2  -2   3  365.23    3.56   0
   2  -1   2  285.06    3.86   0
   2  12  -1    0.47    1.23   0
   3  -4   9   95.74    1.79   0
   3  -4  10    1.24    1.36   0
   3  -4  11   -0.56    1.62   0
   3  -3   6  216.99    2.40   0
   3   4   0  567.34    8.96   0
   4  -3  10    4.28    1.94   0
   4  -3  11    2.23    2.28   0
   4  -1   5   41.29    1.32   0
   4   2   2  969.81    8.35   0
   4  12   1    4.97    2.05   0
   5  -1   8  659.94    4.40   0
   5  -1   9    7.99    1.38   0
   5   0   6   -0.24    1.00   0
   5   3   3  528.52    5.92   0
   6   1   9    0.17    1.58   0
  -9   3   2   11.43    1.69   0
  -8   1   2   80.22    2.45   0
  -8   7   0   11.16    1.60   0
  -8   8   0   13.42    1.80   0
  -7   1   1    4.70    1.29   0
  -6  -5   6  134.43    3.01   0
  -6   5  -1  448.73    3.58   0
  -6  11  -1    0.72    2.02   0
  -5   3  -1  941.11    5.45   0
  -4  -7  10   42.14    2.40   0
  -4   2  -1   60.25    1.75   0
  -4   5  -2  267.21    2.63   0
  -4   6  -2   30.25    1.42   0
  -4  10  -2   69.91    1.86   0
  -4  11  -2  176.15    2.20   0
  -3  -7   9    0.29    1.77   0
  -3  -7  10   45.95    1.81   0
  -3  -6   6    5.33    1.20   0
  -3  -4   3   23.17    1.44   0
  -3  11  -2    4.91    1.67   0
  -3  12  -2  186.20    2.25   0
  -2  -7   9   20.67    1.71   0
  -2  -7  10    1.65    1.44   0
  -2  -7  11   11.07    1.74   0
  -2  -6   6   17.24    1.33   0
  -2  -4   3    1.54    0.75   0
  -2  -2   1  879.63   12.00   0
  -2   4  -2  269.79    2.85   0
  -2  12  -2   -0.17    1.27   0
  -1  -7  10  136.19    2.40   0
  -1  -7  11  106.19    2.68   0
  -1  -3   2  833.45    6.72   0
  -1  11  -2  122.95    2.11   0
  -1  12  -2    0.26    1.23   0
   0  -5   5  750.78    4.54   0
   0   2  -1   33.94    2.07   0
   0  10  -2    8.89    1.42   0
   0  11  -2   47.75    1.49   0
   0  14  -1    9.93    1.71   0
   1  -6   9  166.51    2.36   0
   1  -6  10  123.95    2.04   0
   1  -6  11   -0.31    1.53   0
   1  -5   6   48.63    1.52   0
   1  -3   3  908.67    5.55   0
   1  -2   2 1626.76    8.45   0
   1   3  -1 3629.64   15.34   0
   1  13  -1   32.80    1.63   0
   2  -5   8   26.37    1.25   0
   2  -3   4  159.09    2.21   0
   2   5  -1 1572.52    8.95   0
   2  11  -1   86.33    1.86   0
   2  14   0   17.95    1.90   0
   3  -4   8   34.63    1.37   0
   3  -2   4  315.42    3.20   0
   3  -1   3    8.39    0.88   0
   3  12   0   19.86    1.54   0
   4  -3   8   85.16    2.01   0
   4  -3   9    0.19    1.24   0
   4  -2   6  130.48    1.97   0
   5  -1   7  174.83    2.55   0
   5  10   2   43.30    2.63   0
   6   1   8    4.03    1.43   0
   6   2   6  231.04    3.21   0
   6   5   4    2.94    1.79   0
  -9   0   4   -0.03    2.16   0
  -8  -4   7    0.00    2.65   0
  -7   4   0   52.35    1.53   0
  -6  -6   8    3.58    2.03   0
  -6   0   1   -0.10    1.14   0
  -6   6  -1   21.05    1.43   0
  -6   7  -1  570.20    3.74   0
  -6   8  -1   10.87    1.65   0
  -6   9  -1  173.33    2.40   0
  -6  10  -1  153.90    2.22   0
  -5  -6   7  354.83    3.81   0
  -5  -5   5  466.71    5.12   0
  -5  -1   1   60.95    2.58   0
  -5  12  -1    0.02    1.68   0
  -4  -7   9   28.03    1.61   0
  -4  -6   6  377.81    3.86   0
  -4   0   0 1096.45    8.36   0
  -4   7  -2  154.32    1.98   0
  -4   8  -2    0.82    0.90   0
  -4   9  -2  197.84    2.13   0
  -3  -7   8   19.70    1.62   0
  -3   5  -2  274.10    2.74   0
  -3  10  -2  568.50    3.45   0
  -2  -7   8   51.74    1.79   0
  -2  -5   4 1140.85    6.43   0
  -2   5  -2  861.55    4.81   0
  -2  10  -2   44.47    1.59   0
  -2  11  -2   25.76    1.29   0
  -1  -7   9   18.88    1.34   0
  -1  -6   6  266.44    2.90   0
  -1  -4   3   29.35    1.27   0
  -1   5  -2   10.00    0.87   0
  -1  10  -2  418.76    3.19   0
  -1  14  -1   -0.58    1.73   0
   0  -7  11   81.03    2.49   0
   0  -6   7  203.53    2.29   0
   0   6  -2  231.56    2.61   0
   0   7  -2  278.95    2.77   0
   0   8  -2  240.50    2.51   0
   0   9  -2    8.20    0.92   0
   0  13  -1  201.08    2.75   0
   1  -6   8   15.34    1.54   0
   1  -4   4  331.59    3.20   0
   1  12  -1    5.06    1.53   0
   2  -5   7   16.62    1.36   0
   2  -4   5    9.34    1.24   0
   2   6  -1   10.22    1.31   0
   2  10  -1  370.63    3.37   0
   2  13   0   10.29    2.06   0
   3  -5  11   33.49    2.35   0
   3  -4   7  173.74    2.09   0
   3  -3   5  373.35    3.23   0
   3   0   2    0.40    0.80   0
   3  11   0   90.03    2.22   0
   4  -3   7  212.31    2.51   0
   4  11   1  177.51    3.23   0
   5  -2   9    1.72    1.37   0
   5  -2  10   31.47    1.75   0
   5   0   5    5.82    1.25   0
   6   0   9    0.72    1.61   0
   6   1   7  258.80    2.97   0
   6   3   5    0.23    1.07   0
   7   5   7    0.13    2.32   0
  -9  -1   5   15.04    2.98   0
  -9   2   3   47.55    2.52   0
  -9   5   2   22.35    2.17   0
  -8   4   1   30.76    1.53   0
  -7  -5   7   26.24    2.35   0
  -7   5   0    0.56    1.09   0
  -7   9   0    5.92    2.08   0
  -5  -7   9   40.95    2.42   0
  -5   4  -1   87.54    1.83   0
  -5  11  -1    3.25    1.44   0
  -4  -7   8   54.24    2.10   0
  -4  12  -1    3.25    1.75   0
  -3  -5   4  605.88    4.97   0
  -3   6  -2  515.07    3.47   0
  -3   7  -2   83.15    1.52   0
  -3   8  -2  321.87    2.64   0
  -3   9  -2   29.85    1.20   0
  -3  13  -1   -0.51    1.54   0
  -2   6  -2  168.24    2.08   0
  -2   7  -2   60.93    1.56   0
  -2   8  -2  417.96    3.22   0
  -2   9  -2  332.29    2.70   0
  -2  13  -1    0.73    1.79   0
  -1  -7   8    0.41    1.03   0
  -1  -5   4  368.28    3.48   0
  -1   6  -2    2.31    0.74   0
  -1   7  -2    5.14    0.78   0
  -1   8  -2   55.35    1.33   0
  -1   9  -2  116.69    1.75   0
  -1  13  -1  117.39    2.02   0
   0  -7   9  189.01    2.53   0
   0  -7  10   42.87    1.60   0
   0  -6   6  233.41    2.64   0
   1  -6   7  284.71    2.72   0
   1  -1   1  208.39    4.13   0
   1  11  -1    2.78    1.40   0
   1  14   0   -0.11    1.68   0
   2  -6   9   -0.17    1.47   0
   2  -6  10   14.28    1.50   0
   2  -6  11    1.07    1.64   0
   2   0   1    0.56    1.44   0
   2   7  -1 1463.25    7.46   0
   2   8  -1    5.89    0.93   0
   2   9  -1  179.88    2.43   0
   3  -5   9   32.82    1.41   0
   3  -5  10   -0.22    1.41   0
   3  10   0  241.37    3.14   0
   3  13   1   -0.03    2.16   0
   4  -4   9  166.39    2.56   0
   4  -4  10   14.71    1.55   0
   4  -4  11    0.30    1.75   0
   4  -2   5   78.93    1.82   0
   4  -1   4  417.68    3.69   0
   4   0   3   -0.14    1.14   0
   5  -2   8   64.86    1.66   0
   5  -1   6  772.00    4.71   0
   5   1   4   82.56    1.97   0
   5   9   2  114.19    3.47   0
   6   0   8   16.30    1.50   0
   6  10   4    9.93    3.33   0
  -8   0   3   -0.01    1.78   0
  -8   2   2   31.19    1.85   0
  -8   5   1    4.97    1.34   0
  -8   6   1    9.99    1.82   0
  -8   7   1   10.31    1.94   0
  -8   8   1    3.74    2.10   0
  -7   6   0   67.15    1.64   0
  -7   7   0   41.61    1.56   0
  -7   8   0  210.68    2.47   0
  -6   3   0  327.38    3.37   0
  -6  11   0    3.30    2.28   0
  -5   5  -1  915.66    4.73   0
  -5   9  -1   23.72    1.28   0
  -5  10  -1   13.33    1.40   0
  -4  -4   3  409.96    5.59   0
  -4   3  -1    2.01    0.75   0
  -4  11  -1  165.11    2.06   0
  -3  -7   7   70.54    1.96   0
  -3   2  -1 1674.69    7.96   0
  -3  12  -1   35.77    1.46   0
  -2  -8  10   18.17    2.03   0
  -2  -7   7    2.26    1.03   0
  -2  -6   5   99.17    2.02   0
  -2  12  -1   36.23    1.88   0
  -1  -8  11   20.65    2.27   0
  -1  -2   1  155.07    3.99   0
  -1   2  -1   33.29    1.90   0
  -1  12  -1  101.52    2.16   0
   0  -7   8  568.06    3.63   0
   0  -4   3   14.68    1.04   0
   0  -3   2 1618.34    8.36   0
   0  12  -1    6.39    1.17   0
   0  14   0    0.76    1.99   0
   1  -7  10   33.16    1.62   0
   1  -7  11   12.66    1.69   0
   1  -5   5  133.92    1.95   0
   1  10  -1   24.41    1.51   0
   2  -6   8    2.61    1.45   0
   2  -5   6   57.28    1.42   0
   2  12   0    0.18    1.55   0
   3  -5   8 1020.68    4.88   0
   3  -4   6    7.67    1.00   0
   3   9   0   93.27    2.27   0
   4  -4   8  269.41    2.59   0
   4  -3   6   83.78    1.59   0
   4  10   1   66.75    2.03   0
   5  -3   9   51.08    2.18   0
   5  -3  10    6.95    1.64   0
   5  -2   7  563.60    3.85   0
   6  -1   9    0.27    2.14   0
   6   0   7    0.47    1.66   0
   6   1   6    4.29    1.15   0
   6   2   5    5.07    1.45   0
   6   4   4    5.54    1.49   0
   7   4   7  139.08    2.86   0
   7   6   6    0.46    2.06   0
  -9   3   3    6.91    2.15   0
  -7   0   2   -0.14    1.22   0
  -6  -6   7   71.18    2.48   0
  -6  10   0   15.38    1.52   0
  -5  -7   8   51.94    1.88   0
  -5  -6   6  143.80    2.82   0
  -5   6  -1   28.03    1.16   0
  -5   7  -1   57.83    1.40   0
  -5   8  -1  125.48    1.81   0
  -5  12   0    3.94    1.70   0
  -4  -8  10   43.24    2.57   0
  -4  -7   7  227.33    3.05   0
  -4  -5   4  161.91    2.86   0
  -4  -3   2  723.29   11.99   0
  -4  10  -1   71.71    1.57   0
  -4  13   0    0.36    2.07   0
  -3  -8   9    1.62    1.81   0
  -3  -8  10   48.84    1.93   0
  -3  -6   5  128.33    2.21   0
  -3  11  -1  176.86    2.07   0
  -2  -8   9  173.57    2.69   0
  -2   2  -1  395.53    4.17   0
  -2  14   0   20.21    1.77   0
  -1  -8  10    3.43    1.50   0
  -1  -7   7   64.87    1.52   0
  -1  -6   5 1563.58    6.52   0
  -1  11  -1  335.21    2.99   0
  -1  14   0   -0.18    1.64   0
   0  -8  11   27.07    2.54   0
   0  -5   4  143.32    2.11   0
   0  11  -1  108.13    1.85   0
   1  -7   9   15.09    1.31   0
   1  -6   6  101.73    1.90   0
   1   4  -1 2000.91    9.92   0
   1   9  -1    2.36    1.12   0
   1  13   0    7.99    1.46   0
   2  -7  11   16.65    2.28   0
   2  -4   4  984.16    5.19   0
   2  -3   3    3.62    1.10   0
   3  -6  10    0.35    2.05   0
   3  -6  11   -2.25    1.87   0
   3  -5   7  165.57    2.06   0
   3  -3   4  232.65    2.71   0
   3  -2   3  450.31    3.90   0
   3   5   0  256.36    4.58   0
   3   8   0   32.36    1.69   0
   3  12   1   35.34    2.10   0
   4  -5  10   -0.22    2.16   0
   4  -4   7   56.35    1.78   0
   4   9   1   50.02    2.05   0
   4  12   2   14.44    2.24   0
   5  -3   8   81.24    2.10   0
   5  -1   5   53.88    1.72   0
   5   2   3 1530.76    8.97   0
   5   8   2   -0.14    1.72   0
   6  -1   8    5.17    1.40   0
   7   2   8   -0.06    2.36   0
   7   3   7   15.50    2.27   0
   7   5   6  342.18    4.96   0
  -9   1   4    0.11    2.09   0
  -7   3   1  195.49    2.77   0
  -6   4   0    5.86    0.96   0
  -6   5   0    1.38    1.28   0
  -6   8   0  297.83    2.85   0
  -6   9   0  168.19    2.16   0
  -5   2   0  143.04    2.38   0
  -5  11   0   -0.55    1.42   0
  -4  -8   9   27.74    2.26   0
  -4  -6   5    0.34    1.17   0
  -4   4  -1   80.50    1.58   0
  -4   5  -1  531.33    3.69   0
  -4   8  -1  156.51    2.08   0
  -4   9  -1   49.30    1.32   0
  -4  12   0   21.53    2.03   0
  -3   3  -1 1214.92    6.28   0
  -3  10  -1   -0.56    1.06   0
  -3  13   0   34.25    1.69   0
  -2  -7   6   -0.31    1.24   0
  -2  11  -1    0.17    1.04   0
  -2  13   0   10.02    1.98   0
  -1  -8   9   69.01    1.74   0
  -1  13   0    8.43    1.93   0
   0  -8  10  151.34    2.27   0
   0  -7   7    5.64    1.03   0
   0  -6   5  116.32    1.92   0
   0   3  -1  432.87    4.69   0
   0  10  -1  123.47    1.84   0
   0  13   0   -0.03    1.31   0
   1  -7   8    7.87    1.17   0
   1   5  -1 1605.47    8.00   0
   1   8  -1  707.47    4.59   0
   1  12   0  237.38    2.79   0
   1  14   1   -0.21    2.32   0
   2  -7   9    8.82    1.70   0
   2  -7  10   67.72    1.88   0
   2  -6   7  294.19    2.67   0
   2  -5   5   27.94    1.33   0
   2  -2   2  282.44    3.46   0
   2  11   0   52.96    1.55   0
   2  13   1    0.36    1.98   0
   3  -6   9  182.08    2.26   0
   3  -4   5    2.90    0.86   0
   3   6   0  103.35    2.66   0
   3   7   0  116.27    2.58   0
   4  -5   9  192.18    2.36   0
   4  -3   5   67.77    1.70   0
   4  -2   4  217.65    2.67   0
   4   1   2   20.52    1.49   0
   5  -4  10    0.13    2.39   0
   5  -2   6   88.96    1.76   0
   5   0   4    0.29    0.88   0
   5   7   2  129.46    4.54   0
   5  11   3   93.07    3.31   0
   6  -2   9    0.21    2.19   0
   6  -1   7  260.47    3.00   0
   6   0   6  206.73    2.89   0
   6   3   4  225.08    3.65   0
   7   4   6   34.70    2.19   0
  -8   4   2   46.26    2.04   0
  -8   8   2    0.83    2.32   0
  -7  -6   8   10.11    2.41   0
  -7   4   1    0.60    1.27   0
  -7   8   1    3.09    1.73   0
  -7   9   1    0.74    1.52   0
  -6   1   1  362.68    4.11   0
  -6   6   0   13.90    1.06   0
  -6   7   0  149.99    2.02   0
  -6  11   1    6.56    2.34   0
  -5  -7   7    2.56    1.59   0
  -5  10   0   27.56    1.44   0
  -4   6  -1  198.29    2.23   0
  -4   7  -1  730.71    3.99   0
  -3  -8   8   14.59    1.37   0
  -3  -7   6   -0.01    0.95   0
  -3   0   0    0.10    0.83   0
  -3   4  -1  319.62    3.09   0
  -3   8  -1    2.56    1.17   0
  -3   9  -1  133.96    1.82   0
  -3  12   0   17.75    1.78   0
  -2  -8   8    7.54    1.24   0
  -2   3  -1    6.81    1.14   0
  -2   9  -1    0.03    1.19   0
  -2  10  -1   91.94    1.62   0
  -1  -8   8   33.39    1.40   0
  -1  -7   6  609.37    4.00   0
  -1  10  -1   32.86    1.30   0
   0  -8   9   22.59    1.50   0
   0  -7   6    4.05    1.12   0
   0   9  -1    5.48    0.94   0
   0  12   0  379.10    3.22   0
   0  14   1    7.96    2.24   0
   1  -8  10    0.26    1.57   0
   1  -7   7   62.48    1.49   0
   1  -5   4   14.57    0.91   0
   1  -4   3   85.63    1.71   0
   1   6  -1  912.99    5.65   0
   1   7  -1  139.65    2.17   0
   2  -7   8   65.35    1.81   0
   2  -6   6    7.21    1.19   0
   2  10   0    0.87    1.20   0
   3  -6   8   34.68    1.37   0
   3  -5   6   35.64    1.28   0
   3   1   1    0.29    0.99   0
   3  11   1  189.80    2.85   0
   3  13   2    0.92    2.20   0
   4  -5   8   54.86    1.55   0
   4  -4   6    0.98    0.88   0
   4  -1   3 3131.48   10.38   0
   4   8   1  150.50    3.16   0
   5  -4   9   46.90    1.74   0
   5  -3   7    0.18    1.07   0
   5   6   2   77.02    4.56   0
   6  -2   8    0.13    1.89   0
   6   1   5  170.82    2.63   0
   7   1   8  144.73    2.62   0
   7   2   7   -0.22    1.48   0
  -8   1   3  152.92    2.97   0
  -8   5   2   20.67    1.49   0
  -8   6   2   19.00    1.53   0
  -8   7   2    1.07    1.55   0
  -7  -4   5   60.01    4.98   0
  -7   5   1    3.97    1.12   0
  -7   6   1  189.36    2.36   0
  -7   7   1    6.80    1.32   0
  -6  -7   8   12.38    2.24   0
  -6  -5   5  245.28    4.54   0
  -6  -4   4  196.09    5.82   0
  -6  -1   2  137.79    3.53   0
  -6  10   1   14.91    1.97   0
  -5  -8   9    2.39    2.37   0
  -5   3   0   28.13    1.35   0
  -5   9   0    7.88    1.12   0
  -5  12   1    0.21    1.66   0
  -4  -8   8  218.76    2.81   0
  -4  -7   6  128.39    2.50   0
  -4  11   0   73.53    1.64   0
  -4  13   1   39.72    1.88   0
  -3   5  -1   91.91    1.64   0
  -3   6  -1  161.82    2.04   0
  -3   7  -1  207.23    2.20   0
  -2  -9  10    9.34    1.81   0
  -2  -8   7  186.60    2.58   0
  -2  -6   4    7.90    1.08   0
  -2  -5   3  122.71    2.43   0
  -2   8  -1  258.97    2.59   0
  -2  12   0    1.02    1.19   0
  -1  -9  10   30.24    2.42   0
  -1  -8   7  205.64    2.51   0
  -1  -5   3  299.96    3.30   0
  -1   3  -1  785.88    5.64   0
  -1   8  -1   20.64    1.35   0
  -1   9  -1  162.22    2.03   0
  -1  12   0  203.72    2.31   0
  -1  14   1    0.40    1.72   0
   0  -8   8   92.28    1.78   0
   0  -2   1   32.93    1.82   0
   0   4  -1 1137.30    6.70   0
   0   7  -1  134.46    2.11   0
   0   8  -1   57.12    1.34   0
   1  -8   9   68.76    1.76   0
   1  -6   5  131.67    1.89   0
   1  -3   2 2333.49    9.23   0
   1  11   0   27.92    1.28   0
   1  13   1  105.06    2.49   0
   2  12   1   39.67    1.96   0
   3  -7  10   -0.01    1.62   0
   3  -6   7  390.21    2.97   0
   4  -6  10   11.62    1.78   0
   4  -5   7  480.47    3.45   0
   4   7   1  712.26    7.09   0
   4  11   2  179.79    3.12   0
   5  -4   8   13.32    1.38   0
   5  -3   6   66.94    1.85   0
   5  -2   5   29.48    1.48   0
   5   1   3   19.26    1.43   0
   6  -3   9    1.78    2.06   0
   6  -1   6    6.81    1.41   0
   6   9   4   79.01    4.18   0
   7   1   7   25.25    2.00   0
   7   3   6  277.74    3.99   0
  -9   2   4   42.21    2.01   0
  -8  -1   4   70.53    2.75   0
  -7  -5   6    0.07    2.05   0
  -7   1   2  350.15    3.91   0
  -6   9   1    7.91    1.59   0
  -5   4   0  608.92    4.07   0
  -5   5   0   63.36    1.69   0
  -5   6   0  116.87    1.99   0
  -5   7   0   51.71    1.33   0
  -5   8   0  146.18    1.95   0
  -5  11   1  269.22    2.86   0
  -4  10   0   -0.34    1.04   0
  -4  12   1   91.11    2.27   0
  -3  -9   9  126.93    2.63   0
  -3  -8   7   16.54    1.30   0
  -3  11   0   94.28    1.70   0
  -3  13   1    9.71    1.58   0
  -2  -9   9    0.44    1.49   0
  -2  -7   5  229.52    2.81   0
  -2   4  -1    3.34    0.83   0
  -2   5  -1  345.82    3.11   0
  -2   6  -1   33.86    1.27   0
  -2   7  -1  471.10    3.31   0
  -2  11   0   50.00    1.68   0
  -1  -9   9    0.45    1.99   0
  -1  -7   5  278.11    3.01   0
  -1  -6   4  230.15    2.64   0
  -1   4  -1  272.60    3.08   0
  -1   6  -1   25.85    1.29   0
  -1   7  -1  827.24    4.52   0
  -1  11   0   25.55    1.51   0
   0  -9  10   -0.25    1.75   0
   0  -8   7    1.04    1.40   0
   0  -6   4 1073.04    5.40   0
   0  -5   3  310.79    3.17   0
   0   5  -1  389.75    3.64   0
   0   6  -1  137.96    2.10   0
   0  11   0   -0.25    1.02   0
   0  13   1  200.17    2.78   0
   1  -8   8  303.74    2.71   0
   1  -7   6  126.53    1.79   0
   1  10   0  803.80    4.78   0
   2  -8   9   32.76    1.95   0
   2  -8  10    0.09    1.57   0
   2  -7   7    1.25    1.06   0
   2  -5   4   37.17    1.41   0
   2   9   0  114.65    1.98   0
   3  -7   9   66.27    1.78   0
   3  -5   5  107.76    1.71   0
   3  -4   4   71.60    1.47   0
   3  -3   3  792.18    4.85   0
   3  10   1    1.29    1.40   0
   4  -6   9  103.66    2.00   0
   4  -4   5   95.72    1.83   0
   4   5   1  502.51    8.67   0
   4   6   1  202.08    4.36   0
   5  -5   9   41.36    1.80   0
   5  -4   7  275.84    2.65   0
   5  -1   4   84.21    1.79   0
   6  -3   8   -1.12    1.78   0
   6  -2   7   51.00    1.64   0
   6   0   5   -0.59    1.03   0
   6   2   4   10.49    1.47   0
   7   0   8    0.34    1.64   0
   7   2   6    1.96    1.70   0
  -9   0   5   66.85    2.78   0
  -9   3   4   54.74    2.05   0
  -9   4   4   -0.05    2.28   0
  -8   2   3   52.26    2.04   0
  -7  -1   3   16.86    1.67   0
  -7   9   2    6.30    1.50   0
  -6  -6   6    9.00    1.76   0
  -6   8   1    1.20    1.14   0
  -6  11   2    0.24    2.04   0
  -5  -8   8  271.54    3.60   0
  -5  -6   5  115.80    2.75   0
  -5  -5   4   88.69    2.74   0
  -5   0   1  399.59    4.86   0
  -5  10   1   44.54    1.88   0
  -4  -8   7    4.25    1.67   0
  -4   2   0    6.15    1.03   0
  -4   8   0   44.90    1.51   0
  -4   9   0  137.68    1.85   0
  -3  -7   5  138.78    2.41   0
  -3  -6   4   -0.02    0.82   0
  -3  -5   3  182.30    2.98   0
  -3  10   0  226.50    2.33   0
  -2  -9   8  100.76    2.20   0
  -2  -4   2 1883.65    9.91   0
  -2  13   1   15.19    1.52   0
  -1  -9   8   77.44    2.05   0
  -1  -4   2 2298.68    9.94   0
  -1   5  -1  707.19    4.53   0
  -1  13   1   30.63    1.57   0
   0  -9   9  316.40    2.93   0
   0  -7   5  134.29    1.91   0
   1  -9  10   30.05    1.87   0
   1  -8   7   -1.63    1.46   0
   1  12   1  121.58    2.30   0
   1  14   2   55.28    2.03   0
   2  -8   8  137.32    2.24   0
   2  -6   5  113.23    1.73   0
   2  -4   3 1528.98    6.54   0
   2   8   0 1050.79    5.89   0
   2  11   1   -0.02    1.44   0
   2  13   2    0.10    1.85   0
   3  -7   8  363.92    2.95   0
   3  -6   6    1.89    0.92   0
   3  12   2  179.68    2.67   0
   4  -6   8  233.18    2.48   0
   4  -5   6    8.10    1.00   0
   4  -3   4  567.91    3.89   0
   4   0   2 2958.92   11.77   0
   4  10   2   66.92    2.25   0
   4  12   3    0.14    2.16   0
   5  -5   8   11.28    1.42   0
   5   4   2  521.76   11.38   0
   5  10   3   53.53    2.41   0
   6  -4   9   76.77    2.42   0
   7  -1   8  148.02    2.93   0
   7   0   7   60.31    2.31   0
  -8   7   3   43.77    1.79   0
  -7  -6   7    3.63    2.47   0
  -7   7   2  107.17    2.24   0
  -7   8   2    0.00    1.39   0
  -6  -7   7    1.66    1.80   0
  -6   3   1   31.43    1.30   0
  -6   4   1  209.05    2.60   0
  -6   5   1    5.08    1.27   0
  -6   6   1  100.64    1.75   0
  -6   7   1  110.43    1.82   0
  -6  10   2    0.20    1.91   0
  -5  -7   6   61.34    2.18   0
  -5  12   2   16.82    1.78   0
  -4  -9   9   16.10    1.83   0
  -4   7   0  198.57    2.32   0
  -4  11   1   38.92    1.49   0
  -3  -9   8   16.46    1.52   0
  -3   9   0   83.99    1.54   0
  -3  12   1   34.66    1.46   0
  -2  -8   6  126.99    2.02   0
  -2  10   0   -0.04    0.94   0
  -2  12   1    0.11    1.55   0
  -1  -8   6  518.56    3.66   0
  -1  10   0  760.55    4.11   0
  -1  14   2   45.82    1.89   0
   0  -9   8  312.95    2.89   0
   0  -8   6  104.37    2.02   0
   0  -4   2  152.48    2.47   0
   0  10   0   83.61    1.57   0
   0  12   1    6.90    1.49   0
   0  14   2  115.03    2.25   0
   1  -9   9  140.42    2.18   0
   1  -7   5  522.15    3.59   0
   1  -6   4   61.87    1.43   0
   1  -5   3  611.48    4.05   0
   1   9   0   44.62    1.36   0
   2  -7   6   39.97    1.29   0
   2  -3   2  174.97    2.59   0
   2  -1   1 2518.90   11.84   0
   2   7   0  315.14    3.62   0
   3  -8   9   70.15    2.38   0
   3  -7   7  172.76    2.14   0
   3   9   1  145.31    2.63   0
   3  13   3    0.31    2.26   0
   4  -7   9   36.00    1.78   0
   4  -6   7    0.75    1.15   0
   4  -2   3  303.76    3.13   0
   5  -6   9   45.55    2.25   0
   5  -4   6  342.41    2.95   0
   5  -3   5  149.58    2.09   0
   5   0   3  370.14    3.88   0
   6  -3   7  296.25    2.88   0
   6  -2   6  231.88    2.66   0
   6  -1   5  160.31    2.56   0
   6   1   4   55.64    1.97   0
   7   1   6   17.80    1.94   0
   7   4   5  104.74    3.22   0
   7   5   5   17.17    2.52   0
  -9   1   5   13.94    2.28   0
  -8   4   3   11.77    1.38   0
  -8   5   3  133.87    2.25   0
  -8   6   3    6.04    1.44   0
  -7   3   2   14.02    1.20   0
  -7   4   2  398.37    3.41   0
  -7   5   2  266.75    2.78   0
  -7   6   2   17.69    1.26   0
  -5   8   1  420.67    3.23   0
  -5   9   1  200.80    2.18   0
  -5  11   2   42.87    1.93   0
  -4  -9   8   21.43    1.97   0
  -4  -7   5    5.95    1.31   0
  -4  -6   4   39.05    1.69   0
  -4  -1   1  785.37    9.03   0
  -4   3   0    4.95    0.84   0
  -4   4   0    0.58    0.74   0
  -4   5   0  135.47    1.92   0
  -4   6   0  459.13    3.29   0
  -4  10   1  204.42    2.40   0
  -4  12   2   40.11    2.13   0
  -3  -8   6  156.73    2.32   0
  -3   8   0   30.34    1.14   0
  -3  11   1    1.87    1.12   0
  -3  13   2  106.63    2.04   0
  -2  -9   7   11.99    1.63   0
  -2   9   0  116.94    1.71   0
  -1  -9   7  219.99    2.69   0
  -1   9   0   46.37    1.50   0
  -1  12   1    6.81    1.22   0
   0   9   0   -0.47    0.86   0
   1  -9   8    0.40    1.25   0
   1  -8   6  131.00    2.12   0
   1  -2   1   32.86    1.67   0
   1   8   0  537.11    4.05   0
   1  11   1  340.26    3.18   0
   1  13   2  138.38    2.23   0
   2  -9   9   -0.42    2.13   0
   2  -8   7   93.10    1.75   0
   2   6   0 1676.07    8.50   0
   2  10   1   92.34    2.06   0
   3  -8   8    8.47    1.84   0
   3  -6   5  717.02    4.09   0
   3  -5   4  988.08    4.69   0
   3  -2   2  576.78    4.51   0
   3  11   2    6.74    1.70   0
   4  -7   8   11.51    1.38   0
   4  -5   5   61.63    1.65   0
   5  -6   8   82.27    2.15   0
   5  -5   7    1.69    1.23   0
   5  -2   4   39.55    1.32   0
   6  -4   8    3.86    1.50   0
   7  -2   8    0.00    1.73   0
   7  -1   7   23.46    1.63   0
   7   3   5    1.93    1.74   0
   7   6   5   70.25    4.30   0
  -9   2   5   10.40    2.35   0
  -8  -2   5   92.22    3.60   0
  -8   0   4  122.30    2.88   0
  -7   9   3   18.17    1.62   0
  -6   0   2    3.33    1.19   0
  -6   9   2   -0.00    1.23   0
  -5  -8   7  208.09    3.30   0
  -5  -4   3  945.52   13.31   0
  -5  -2   2   84.30    3.79   0
  -5   7   1   36.05    1.50   0
  -4  -8   6  218.64    3.07   0
  -4   9   1   23.74    1.45   0
  -3  -9   7   35.14    1.93   0
  -3  -4   2   78.88    2.58   0
  -3   7   0  120.96    1.75   0
  -2 -10   9    4.82    1.73   0
  -2  -7   4  119.81    2.17   0
  -2   8   0 1055.97    4.78   0
  -2  11   1   88.30    1.66   0
  -2  13   2   16.32    1.55   0
  -1 -10   9    3.16    1.63   0
  -1  -8   5  543.39    3.87   0
  -1  -7   4  601.06    3.99   0
  -1  -6   3  451.98    3.82   0
  -1  11   1    1.01    1.37   0
  -1  13   2    1.69    1.41   0
   0 -10   9    0.17    1.58   0
   0  -9   7   21.24    1.30   0
   0  -7   4  105.64    1.92   0
   0  11   1  102.14    1.75   0
   0  13   2    7.20    1.42   0
   1  -4   2  620.05    4.46   0
   2  -9   8   21.16    1.91   0
   2  -7   5  432.75    3.09   0
   2  -6   4 1441.11    5.69   0
   2  -5   3 1575.93    6.43   0
   2   3   0  465.10    7.42   0
   2   5   0  412.75    4.71   0
   2  12   2   -0.20    1.28   0
   3  -7   6  179.73    2.10   0
   3  -4   3  478.08    3.58   0
   3   0   1    3.91    1.19   0
   3   8   1    2.61    1.19   0
   4  -8   9   10.82    2.16   0
   4  -7   7  100.01    2.05   0
   4  -6   6   43.99    1.36   0
   4  -4   4    9.73    0.92   0
   4   9   2  216.18    3.40   0
   4  11   3   77.00    2.53   0
   5  -5   6    7.32    1.49   0
   5  -4   5   49.60    1.64   0
   5   3   2  600.55    8.34   0
   5   9   3  217.88    4.00   0
   5  11   4   37.16    2.12   0
   6  -4   7  104.44    1.95   0
   6  -3   6  264.73    2.74   0
   6  -2   5    6.20    1.44   0
   6   0   4  817.61    5.59   0
   7   0   6   -0.15    1.29   0
   7   2   5    3.03    1.56   0
  -8   7   4   14.12    2.12   0
  -7   0   3 1097.24    7.58   0
  -7   8   3    1.49    1.39   0
  -6  -8   8    0.12    2.36   0
  -6   7   2   32.80    1.61   0
  -6   8   2  121.48    1.84   0
  -6  10   3   76.53    2.31   0
  -5   2   1    5.03    1.05   0
  -5   6   1   50.42    1.32   0
  -5  10   2  119.97    1.89   0
  -4  -5   3  268.18    4.36   0
  -4  11   2   -0.57    1.25   0
  -3   2   0 2289.05    9.53   0
  -3   5   0  265.82    2.75   0
  -3   6   0   96.66    1.59   0
  -3  10   1    1.11    1.03   0
  -3  12   2   96.94    1.77   0
  -2 -10   8    0.46    1.43   0
  -2  -8   5    3.09    0.97   0
  -2  -6   3    2.79    1.06   0
  -2   7   0  323.99    2.91   0
  -2  12   2    0.16    1.66   0
  -1 -10   8    7.03    1.51   0
  -1  -9   6  110.61    2.03   0
  -1   8   0  516.45    3.51   0
   0 -10   8   -1.09    1.95   0
   0  -8   5  296.49    2.76   0
   0  -6   3  288.09    2.85   0
   1 -10   9    0.86    1.69   0
   1  -9   7   11.85    1.17   0
   1  -7   4   89.04    1.69   0
   1   7   0  410.18    3.59   0
   1  10   1   36.00    1.69   0
   1  12   2   -0.33    1.21   0
   2  -8   6    1.10    1.04   0
   2   4   0  425.15    5.55   0
   2  13   3    0.06    1.54   0
   3  -9   9  167.19    2.41   0
   3  -8   7  190.49    2.21   0
   3  12   3    0.77    1.77   0
   4  -3   3  601.63    4.09   0
   4  -1   2   19.71    1.16   0
   5  -6   7    7.63    1.29   0
   5  -3   4   77.76    1.58   0
   5  -1   3   19.82    1.08   0
   6  -5   8   -0.66    1.59   0
   6   8   4   12.29    2.55   0
   7  -3   8    1.51    1.78   0
   7  -2   7    0.23    1.45   0
   7  -1   6   14.75    1.84   0
  -8   1   4   74.45    2.04   0
  -8   5   4   12.67    1.98   0
  -8   6   4   68.75    2.00   0
  -7   7   3    0.47    1.25   0
  -6   1   2  138.64    2.60   0
  -6   6   2  142.80    2.18   0
  -5  -9   8   30.00    1.99   0
  -5   3   1   36.10    1.22   0
  -5   4   1  106.77    1.81   0
  -5   5   1   19.80    1.09   0
  -5   9   2  109.47    1.75   0
  -5  11   3    9.91    1.50   0
  -4  -9   7  179.48    2.67   0
  -4   8   1  407.78    2.94   0
  -4  12   3    0.54    1.55   0
  -3 -10   8    0.00    1.55   0
  -3  -8   5   69.45    1.94   0
  -3  -7   4  234.01    3.09   0
  -3   3   0  222.31    2.76   0
  -3   4   0  572.41    4.07   0
  -3   9   1   26.68    1.13   0
  -3  11   2   96.14    1.98   0
  -3  13   3    0.93    1.59   0
  -2  -9   6  232.11    2.66   0
  -2   6   0 1685.08    6.50   0
  -2  10   1  388.24    2.88   0
  -2  13   3    2.56    2.10   0
  -1  -5   2  308.70    3.48   0
  -1  -3   1 3371.12   14.81   0
  -1   7   0  400.17    3.19   0
  -1  10   1   20.73    1.10   0
  -1  12   2   11.89    1.28   0
   0  -9   6   16.51    1.22   0
   0  -3   1  422.86    4.62   0
   0   7   0    0.60    0.68   0
   0  10   1  118.32    1.83   0
   0  12   2  178.10    2.24   0
   1 -10   8  102.50    1.99   0
   1  -9   6   68.76    1.77   0
   1  -8   5   78.28    1.53   0
   1  -6   3   13.30    0.88   0
   1   6   0  246.81    3.03   0
   1  13   3   46.94    1.76   0
   2  -9   7   68.88    1.71   0
   2  -4   2  264.28    2.78   0
   2   9   1    0.91    0.83   0
   2  11   2   21.06    1.29   0
   3  -9   8   45.84    1.73   0
   3  -7   5    7.43    0.95   0
   3  -6   4  238.89    2.38   0
   3  -3   2  257.03    2.82   0
   3  10   2  552.48    4.42   0
   4  -8   8  161.21    2.24   0
   4  -7   6  157.29    2.24   0
   4  -6   5  117.15    1.78   0
   4  -5   4  452.42    3.40   0
   4  12   4   17.60    1.88   0
   5  -7   8   -0.53    1.53   0
   5   2   2   17.43    1.56   0
   6  -5   7   46.54    1.70   0
   6  -4   6  256.66    2.63   0
   6  -3   5    0.96    1.28   0
   6  -1   4   57.52    1.57   0
   6   3   3  141.03    3.71   0
   6   4   3   18.66    2.35   0
   7  -3   7   17.75    2.03   0
   7   1   5    8.93    1.31   0
  -9   0   6   -0.01    2.13   0
  -8   2   4   80.13    2.01   0
  -8   3   4  265.09    3.04   0
  -8   4   4  164.59    2.43   0
  -7   1   3   16.61    1.44   0
  -7   5   3   11.22    1.46   0
  -7   6   3    2.35    1.18   0
  -7   9   4    4.00    1.71   0
  -6   4   2  354.09    3.24   0
  -6   5   2  664.17    4.12   0
  -6   9   3  207.56    2.35   0
  -5   8   2   24.50    1.45   0
  -4   7   1   27.62    1.10   0
  -4  10   2  198.31    2.14   0
  -3  -9   6   48.06    1.58   0
  -3  -6   3  243.09    3.36   0
  -3  12   3  249.55    2.83   0
  -2 -10   7  205.09    2.54   0
  -2   1   0   55.15    1.99   0
  -2   5   0  454.23    3.59   0
  -2   9   1  200.99    2.29   0
  -2  11   2  300.27    2.81   0
  -1 -10   7    2.98    1.33   0
  -1   6   0  261.90    2.78   0
  -1  13   3   70.74    1.86   0
   0 -10   7    1.37    1.24   0
   0  -5   2  641.68    4.52   0
   0   6   0  126.59    2.13   0
   0  13   3   41.51    1.67   0
   1   9   1  163.77    2.32   0
   1  11   2  119.94    2.20   0
   2 -10   8    6.18    1.61   0
   2  -8   5  407.31    3.00   0
   2  -7   4   54.81    1.46   0
   2  -2   1  402.68    4.22   0
   2  12   3   26.09    1.95   0
   3  -9   7    5.89    1.63   0
   3  -8   6   -0.13    1.04   0
   3  -5   3   11.61    0.94   0
   3   7   1  208.11    3.23   0
   4  -8   7  149.49    2.09   0
   4  -4   3   47.66    1.51   0
   4   8   2    0.48    1.34   0
   4  10   3    5.72    1.75   0
   5  -7   7   -0.81    1.86   0
   5  -6   6   25.71    1.34   0
   5  -5   5   20.57    1.18   0
   5  -4   4  138.03    2.11   0
   5  -2   3 1546.23    6.79   0
   5  10   4   94.14    2.87   0
   6  -6   8    0.97    1.72   0
   6   2   3  135.38    3.08   0
   7  -2   6    1.22    1.32   0
   7   0   5    4.81    1.22   0
  -7  -2   4   85.70    3.12   0
  -7   3   3    4.57    1.06   0
  -7   4   3  331.72    3.16   0
  -7   8   4    2.05    1.45   0
  -6  -7   6    0.62    1.97   0
  -6   3   2  593.26    4.26   0
  -6   8   3  148.75    2.04   0
  -6  10   4    0.06    1.54   0
  -5  -8   6   -0.14    1.67   0
  -5  -7   5    2.68    1.45   0
  -5   7   2  915.93    4.67   0
  -5  10   3   97.72    1.82   0
  -4 -10   8   24.24    1.90   0
  -4   6   1  350.15    2.87   0
  -4   9   2   73.24    1.53   0
  -4  11   3    5.70    1.32   0
  -3 -10   7   24.02    2.06   0
  -3   8   1   88.37    1.60   0
  -3  10   2  563.75    3.42   0
  -3  13   4   96.98    2.11   0
  -2  -5   2    1.26    0.67   0
  -2   2   0  455.21    4.63   0
  -2   4   0  406.84    3.55   0
  -2  12   3  145.93    2.38   0
  -1 -11   8    2.55    2.16   0
  -1  -9   5    4.77    1.38   0
  -1  -8   4  176.53    2.23   0
  -1   9   1    3.29    0.85   0
  -1  11   2   48.12    1.39   0
   0 -11   8   61.61    2.42   0
   0  -9   5  201.45    2.45   0
   0  -8   4   59.46    1.43   0
   0   9   1    7.68    0.93   0
   0  11   2   48.40    1.48   0
   1 -10   7    3.99    1.32   0
   1  -5   2    9.46    0.87   0
   1  -3   1  783.78    5.65   0
   1   5   0 2402.54    9.81   0
   2  -9   6  506.69    3.37   0
   2  -6   3   94.06    1.64   0
   2   8   1  256.23    2.92   0
   2  13   4    0.13    1.72   0
   3  -1   1    0.63    0.98   0
   3  11   3  176.45    2.73   0
   4  -9   8   11.67    1.77   0
   4  -7   5   70.46    1.73   0
   4  -2   2  974.47    5.67   0
   5  -8   8   20.64    1.79   0
   5   1   2  610.36    5.95   0
   5   8   3   22.49    1.96   0
   6  -6   7    0.02    1.46   0
   6  -5   6  201.55    2.41   0
   6  -4   5  321.26    3.06   0
   6  -2   4    9.77    1.07   0
   6   1   3   76.29    2.21   0
   7  -4   7  146.68    2.79   0
   7  -3   6  284.66    3.12   0
   7  -1   5    8.80    1.71   0
  -8  -1   5    0.47    1.58   0
  -8   6   5   92.75    2.10   0
  -7  -4   5   57.96    5.03   0
  -7   7   4    0.11    1.29   0
  -6  -8   7    0.09    2.16   0
  -6  -2   3  193.38    4.54   0
  -6   7   3  178.83    2.16   0
  -6   9   4  266.57    2.89   0
  -5  -9   7   39.81    2.35   0
  -5   9   3   28.58    1.55   0
  -5  11   4    0.21    1.53   0
  -4  -9   6   95.35    2.42   0
  -4  -8   5  271.49    3.42   0
  -4   0   1    0.24    0.59   0
  -4   5   1   94.03    1.63   0
  -4  12   4    4.40    1.56   0
  -3   7   1   29.86    1.07   0
  -3  11   3  328.28    3.02   0
  -2 -11   8    0.11    1.74   0
  -2  -9   5   14.94    1.13   0
  -2  -8   4    0.63    0.85   0
  -2  -3   1 1339.97   11.33   0
  -2   3   0  447.28    4.03   0
  -2   8   1    2.77    0.93   0
  -2  10   2    2.25    1.34   0
  -2  13   4   15.28    1.63   0
  -1 -10   6  225.71    2.48   0
  -1  -7   3   86.07    1.69   0
  -1   5   0 2265.52    8.17   0
  -1  12   3    0.53    1.23   0
  -1  13   4   11.75    2.16   0
   0 -10   6   89.23    1.73   0
   0  -7   3  150.54    2.02   0
   0   5   0   -0.14    0.72   0
   0  12   3  116.80    2.16   0
   1 -11   8   49.48    1.98   0
   1 -10   6   67.24    1.81   0
   1  -9   5  428.71    3.14   0
   1  -8   4  187.05    2.17   0
   1  -7   3  112.63    1.88   0
   1   4   0  546.34    5.30   0
   1  12   3  128.80    2.11   0
   1  13   4   52.39    2.21   0
   2 -10   7    9.31    1.41   0
   2  -5   2  861.76    4.82   0
   2  10   2   44.26    1.41   0
   3 -10   8    0.22    1.77   0
   3  -9   6   70.62    1.95   0
   3  -8   5   -1.35    1.09   0
   3  -7   4  862.70    4.36   0
   3  -4   2   36.70    1.49   0
   3   9   2   31.59    1.38   0
   3  12   4    0.01    1.57   0
   4  -9   7   49.83    2.04   0
   4  -8   6    1.60    1.23   0
   4  -6   4    1.03    0.85   0
   4  11   4    0.47    1.91   0
   5  -8   7   30.82    2.02   0
   5  -7   6    1.51    1.21   0
   5  -6   5  131.67    1.93   0
   5  -3   3  550.10    4.05   0
   5   0   2   -1.11    1.06   0
   6   0   3    0.02    1.09   0
   8   2   6  165.53    3.43   0
   8   3   6   32.81    2.49   0
  -8   0   5   -0.08    1.70   0
  -8   5   5  423.81    3.54   0
  -7   6   4   73.43    1.74   0
  -6  -6   5   -0.17    1.53   0
  -6   6   3    4.72    1.40   0
  -6  10   5   34.30    2.33   0
  -5  -6   4  124.28    3.18   0
  -5   6   2   75.02    1.53   0
  -5  10   4   45.63    1.92   0
  -4 -10   7    3.69    2.06   0
  -4  -7   4    4.12    0.96   0
  -4   3   1  157.14    2.35   0
  -4   4   1   -0.33    0.72   0
  -4   8   2   81.79    1.52   0
  -4  10   3   26.16    1.29   0
  -3   6   1   94.39    1.75   0
  -3   9   2  114.29    1.73   0
  -3  12   4    7.98    1.49   0
  -2 -10   6   61.90    1.67   0
  -2  -7   3  158.51    2.34   0
  -1 -11   7  117.25    2.11   0
  -1   4   0  517.31    4.24   0
  -1   8   1  681.37    4.01   0
  -1  10   2    0.43    0.92   0
   0 -11   7    1.56    1.43   0
   0  -6   2  240.55    2.77   0
   0   4   0  120.11    2.44   0
   0   8   1   58.57    1.60   0
   0  10   2   10.51    1.35   0
   0  13   4  208.01    2.55   0
   1 -11   7    6.38    1.83   0
   1   8   1   21.14    1.05   0
   1  10   2  403.58    3.31   0
   2 -10   6    1.17    1.55   0
   2  -9   5   28.24    1.28   0
   2  -8   4   94.49    1.62   0
   2  -3   1    6.23    0.92   0
   2  11   3   19.95    1.57   0
   3 -10   7    3.04    1.46   0
   3  -6   3 1202.48    5.20   0
   3   6   1  157.13    2.96   0
   4  -5   3  305.91    2.74   0
   4  -3   2   82.96    1.67   0
   5  -5   4   48.00    1.31   0
   6  -7   7   53.49    2.38   0
   6  -6   6  199.97    2.37   0
   6  -5   5   -0.66    1.51   0
   6  -3   4  220.06    2.55   0
   6   9   5   30.52    2.62   0
   7  -5   7    0.29    1.70   0
   7  -4   6   32.51    2.14   0
   7  -2   5    3.23    1.20   0
   7   1   4  128.69    2.71   0
   7   2   4   89.27    2.63   0
   7   3   4    3.59    1.85   0
   8   0   6  272.41    3.66   0
   8   1   6   70.07    2.28   0
  -8  -3   6   22.40    2.68   0
  -8   1   5    0.03    1.67   0
  -8   3   5    2.17    1.63   0
  -8   4   5   84.30    2.01   0
  -7   5   4    0.14    1.10   0
  -7   8   5   -0.10    1.52   0
  -6   5   3    2.79    1.26   0
  -6   8   4    9.74    1.28   0
  -5  -1   2   64.36    2.35   0
  -5   5   2 1358.53    5.83   0
  -5   8   3  515.03    3.35   0
  -5  11   5    0.83    1.61   0
  -4   2   1  181.36    2.62   0
  -4   7   2   -0.08    1.10   0
  -4   9   3  124.79    2.01   0
  -4  11   4    0.87    1.38   0
  -4  12   5   64.53    1.96   0
  -3 -10   6  102.35    2.05   0
  -3  -9   5  157.47    2.39   0
  -3  -8   4   66.23    1.67   0
  -3  10   3   79.82    1.84   0
  -2 -11   7   91.36    2.05   0
  -2   7   1 1468.14    5.75   0
  -2   9   2  253.72    2.52   0
  -2  11   3   10.36    1.19   0
  -2  12   4    2.27    1.66   0
  -2  13   5   11.60    2.36   0
  -1  -6   2   25.01    1.11   0
  -1   1   0  969.40    9.13   0
  -1   2   0  183.40    3.44   0
  -1   3   0 2616.85   10.43   0
  -1  11   3    9.56    1.48   0
   0 -10   5   31.24    1.58   0
   0  -9   4  244.65    2.61   0
   0  -4   1 1185.28    6.81   0
   1  -6   2    3.38    0.72   0
   1  -4   1  271.46    3.17   0
   1   3   0 2667.79   13.69   0
   1  11   3    0.85    1.52   0
   2 -11   7   83.56    2.37   0
   2  -7   3 1815.76    6.29   0
   2   7   1  466.86    4.10   0
   2   9   2  339.43    3.34   0
   2  12   4    5.54    1.41   0
   3  -9   5   30.92    1.56   0
   3  -2   1 1703.24    8.04   0
   3  10   3  183.56    2.76   0
   4  -9   6  279.36    2.60   0
   4  -8   5   -0.02    1.10   0
   4  -7   4  215.89    2.38   0
   4   1   1   72.54    2.54   0
   4   2   1   64.32    3.17   0
   4   7   2  151.13    3.11   0
   4   9   3   10.32    1.54   0
   5  -8   6   88.32    2.14   0
   5  -7   5    1.62    1.15   0
   5  -4   3  286.24    2.90   0
   5  -1   2  598.36    4.76   0
   6  -4   4    3.33    1.30   0
   6  -1   3   79.45    1.81   0
   7  -3   5    2.03    1.68   0
   7   0   4    0.32    1.43   0
   8  -1   6   69.87    2.46   0
  -7  -7   7   65.19    3.36   0
  -7  -1   4  856.34    7.14   0
  -7   4   4    0.03    1.06   0
  -7   7   5   46.04    1.67   0
  -6   4   3  109.07    2.09   0
  -6   7   4  304.05    2.90   0
  -6   9   5    0.00    1.39   0
  -5   4   2   45.48    1.34   0
  -5   7   3   96.86    1.91   0
  -5   9   4  174.60    2.32   0
  -3 -11   7    0.00    1.55   0
  -3  -5   2   13.93    1.23   0
  -3   5   1  234.23    2.51   0
  -3   8   2  145.12    1.92   0
  -3  11   4   -0.43    1.54   0
  -3  12   5   57.59    2.25   0
  -2   6   1    8.41    1.21   0
  -1 -11   6   17.92    1.87   0
  -1 -10   5  176.51    2.20   0
  -1  -9   4  162.76    2.13   0
  -1  -8   3   58.34    1.60   0
  -1  -4   1 1947.77    9.77   0
  -1   7   1  141.80    1.96   0
  -1   9   2   39.38    1.41   0
  -1  12   4   23.93    1.42   0
  -1  13   5    4.19    1.76   0
   0 -11   6    5.70    1.29   0
   0  -8   3  731.33    4.15   0
   0   3   0    1.23    1.01   0
   0   7   1  130.11    2.08   0
   0  11   3   58.63    1.50   0
   0  12   4   87.25    2.08   0
   0  13   5   -0.02    2.05   0
   1 -11   6   80.18    2.14   0
   1 -10   5   59.36    1.52   0
   1  -9   4   62.26    1.43   0
   1  -8   3  123.33    1.99   0
   1   2   0  171.83    4.80   0
   1   7   1  842.32    5.13   0
   1   9   2  113.67    2.00   0
   1  12   4    0.29    1.31   0
   1  13   5    0.03    1.71   0
   2  -6   2  179.31    2.23   0
   3 -10   6   13.29    1.32   0
   3  -8   4  516.98    3.30   0
   3  -7   3   52.50    1.63   0
   3  -5   2  270.59    2.64   0
   3   8   2  345.00    3.77   0
   3  11   4    2.54    1.81   0
   3  12   5    3.02    2.23   0
   4 -10   7   79.20    2.10   0
   4  -6   3   25.49    1.43   0
   4  -4   2  217.43    2.56   0
   4   0   1    0.01    0.89   0
   5  -9   7    0.41    1.68   0
   5  -6   4   22.58    1.18   0
   5   9   4   14.95    1.78   0
   6  -7   6   42.32    1.67   0
   6  -6   5   81.72    2.06   0
   6  -2   3  141.40    2.35   0
   7  -5   6  393.65    3.34   0
   7  -1   4  128.30    2.52   0
   8  -2   6  159.88    2.93   0
  -8   5   6    0.09    1.58   0
  -7   0   4    1.00    1.34   0
  -7   1   4  880.90    5.91   0
  -7   3   4  218.91    2.66   0
  -7   6   5   23.75    1.71   0
  -7   8   6    4.84    1.68   0
  -6  -1   3  607.20    6.22   0
  -6   3   3  798.37    4.94   0
  -5  -9   6   33.37    2.03   0
  -5   0   2    0.82    0.95   0
  -5   2   2   81.67    1.90   0
  -5   3   2  736.32    4.68   0
  -5  10   5    0.29    1.43   0
  -4  -6   3  262.50    4.08   0
  -4   6   2   49.60    1.28   0
  -4   8   3    6.18    1.33   0
  -4  10   4  100.48    1.78   0
  -4  11   5    0.10    1.44   0
  -3  -7   3  186.01    2.76   0
  -3   4   1 1668.41    6.85   0
  -3   9   3  101.43    1.86   0
  -2 -11   6  112.67    2.07   0
  -2 -10   5   64.08    1.61   0
  -2  -9   4    2.27    0.94   0
  -2  -6   2  626.10    4.94   0
  -2   8   2  718.91    4.09   0
  -2  10   3  597.34    3.59   0
  -1 -12   7   35.48    2.42   0
   0 -12   7    2.73    1.70   0
   0   2   0 3527.77   16.27   0
   0   9   2   10.42    0.96   0
   2 -11   6   41.77    1.64   0
   2 -10   5  343.00    2.80   0
   2  -9   4  103.00    1.67   0
   2  -8   3  126.75    2.01   0
   2  -4   1    3.40    0.79   0
   2   6   1   34.10    1.51   0
   2  10   3    0.10    1.29   0
   3 -11   7   64.00    2.01   0
   3  -3   1 1231.29    6.25   0
   3   5   1   97.07    2.68   0
   4 -10   6    1.72    1.87   0
   4  -9   5    3.35    1.71   0
   4  -8   4   30.12    1.44   0
   4  10   4   88.22    2.14   0
   4  11   5    0.66    2.12   0
   5  -9   6   -0.17    2.06   0
   5  -8   5   30.93    1.85   0
   5  -5   3   24.55    1.10   0
   5  -2   2   17.01    1.04   0
   5   7   3  442.02    5.90   0
   5  10   5   12.21    2.25   0
   6  -5   4    0.83    1.41   0
   6   7   4   16.14    2.33   0
   7  -4   5   95.80    1.93   0
   7  -2   4   92.28    2.19   0
   7   4   4  149.53    4.88   0
   8  -3   6   31.80    2.25   0
  -8   4   6   11.62    1.58   0
  -7   5   5  125.43    2.30   0
  -7   7   6   10.96    2.13   0
  -6   0   3    0.38    1.13   0
  -6   2   3  186.64    2.54   0
  -6   6   4  138.15    1.96   0
  -6   8   5   59.25    1.65   0
  -6   9   6   -0.51    2.10   0
  -5 -10   7   18.72    1.83   0
  -5  -8   5  116.85    2.79   0
  -5   6   3  490.37    3.38   0
  -5   8   4  138.35    1.88   0
  -4 -11   7   -0.05    2.37   0
  -4 -10   6   34.23    1.75   0
  -4  -9   5   40.30    1.65   0
  -4   5   2  980.00    4.95   0
  -3 -10   5   54.63    1.85   0
  -3   3   1 1904.03    7.85   0
  -3   7   2   10.02    0.90   0
  -3  10   4   -0.76    1.49   0
  -2  -8   3  265.05    2.91   0
  -2   5   1 1607.61    6.58   0
  -2  11   4    0.28    1.14   0
  -2  12   5   17.95    1.56   0
  -1   6   1  901.54    4.94   0
  -1  10   3    8.55    1.03   0
  -1  11   4    5.85    1.57   0
  -1  12   5   58.69    2.15   0
   0 -11   5    0.29    1.52   0
   0 -10   4   90.40    1.85   0
   0  -7   2  265.13    2.70   0
   0  -5   1  397.14    3.73   0
   0  10   3  592.04    3.88   0
   1  -7   2    4.31    0.73   0
   1  -5   1  744.23    4.71   0
   1   0   0    0.38    0.85   0
   1  10   3   34.04    1.28   0
   2   8   2  392.81    3.71   0
   2  11   4  115.32    2.06   0
   2  12   5  190.32    2.60   0
   3 -11   6   -0.04    2.01   0
   3 -10   5    5.85    1.27   0
   3  -9   4  151.38    1.93   0
   3  -6   2  504.13    3.42   0
   4  -7   3    3.48    1.27   0
   4  -5   2  275.15    2.73   0
   4  -1   1   69.38    1.88   0
   5  -7   4   10.97    1.16   0
   5  -3   2  590.86    4.21   0
   6  -8   6   89.68    2.02   0
   6  -7   5  141.25    2.09   0
   6  -3   3  129.14    2.06   0
   7  -6   6   -0.41    1.66   0
   7  -5   5   14.03    1.94   0
   7  -3   4    2.15    1.45   0
   8   0   5   -0.06    1.91   0
   8   1   5  452.93    4.94   0
   8   2   5    7.48    1.97   0
  -8   3   6   19.32    1.57   0
  -5   9   5   12.23    1.34   0
  -5  10   6    1.34    1.43   0
  -4  -8   4    0.45    0.94   0
  -4   9   4   25.47    1.20   0
  -4  10   5  416.30    3.01   0
  -3 -11   6   36.57    1.73   0
  -3  11   5   12.23    1.33   0
  -3  12   6   15.97    1.82   0
  -2   9   3   33.57    1.13   0
  -1 -11   5   14.32    1.29   0
  -1 -10   4  176.88    2.26   0
  -1  -7   2  398.23    3.44   0
  -1   8   2   46.13    1.25   0
   0 -12   6    0.02    1.49   0
   0  -9   3   22.75    1.11   0
   0   6   1  125.45    2.11   0
   0  11   4  162.41    2.13   0
   0  12   5    0.01    1.42   0
   1 -12   6   26.61    1.66   0
   1 -11   5   94.57    1.82   0
   1 -10   4   -0.09    0.97   0
   1   6   1   21.92    1.10   0
   1  11   4  130.35    2.01   0
   1  12   5  182.91    2.44   0
   2  -7   2   61.58    1.36   0
   3  -8   3  279.54    2.51   0
   3  -4   1  305.04    2.93   0
   3   9   3  428.61    3.87   0
   4  -2   1   60.27    1.60   0
   5  -6   3   24.63    1.13   0
   6  -6   4   25.98    1.29   0
   6  -4   3   16.30    1.13   0
   8  -1   5  458.92    4.20   0
  -1  -9   5    0.93    0.94   0
  -1  -9   6  106.00    1.76   0
  -1  -9   7  217.87    2.28   0
  -1  -9   8   82.60    1.74   0
  -1  -9   9    0.57    1.41   0
  -1  -8   4  181.28    2.20   0
  -1  -8  10    4.13    1.47   0
  -1  -7   3   90.81    1.73   0
  -1  -7  11  103.07    1.98   0
  -1  -6  11   27.50    2.09   0
  -1  -5   2  278.77    3.03   0
  -1  -5  12    3.78    1.58   0
  -1  -4   2 2499.48    9.29   0
  -1  -4  12    4.77    1.46   0
  -1  -3   2  845.49    5.77   0
  -1  -3  12    0.49    1.40   0
  -1  -1  11   72.70    1.79   0
  -1   0  10    1.21    1.36   0
  -1   1   5   81.22    2.19   0
  -1   1   9  243.85    2.88   0
   0 -12   5    0.30    1.38   0
   0 -12   6    0.00    1.54   0
   0 -12   7    2.16    1.71   0
   0 -11   3   54.97    1.55   0
   0 -10   2    9.07    1.42   0
   0  -9   1    6.88    1.31   0
   0   1  13   14.90    1.81   0
   0   2  12   37.48    2.23   0
   0   3  11   -0.16    1.64   0
   0   4   9    0.09    1.40   0
   1 -13   3   38.92    2.20   0
   1   6   9  160.36    4.84   0
   2 -13   0    8.72    1.55   0
   2 -12  -1    0.00    1.69   0
   3   2  -4  567.82    3.99   0
   3   5  -2   14.90    0.97   0
   3   6  -1   92.67    1.76   0
   3   8   2  337.62    3.78   0
   4  -7  -6  122.83    3.33   0
   4  -1  -6   -0.60    0.80   0
   4   2  -5  132.93    1.90   0
   4   4  -4   10.67    0.96   0
   4   8   0   47.41    1.80   0
   4   9   2  219.22    3.01   0
   5  -5  -7   93.93    2.40   0
   5  -3  -7  248.20    3.04   0
   5  -2  -7  384.68    3.50   0
   5   5  -4   84.24    1.51   0
   5   8  -1  425.81    3.32   0
   5  10   3   53.70    2.37   0
   6  -8  -7   -0.21    2.15   0
   6   0  -7   -0.07    0.99   0
   6   3  -6   82.42    1.62   0
   6   6  -4  147.93    2.00   0
   6   7  -3  185.51    2.24   0
   6   8  -2  133.55    1.99   0
   7  -4  -8   18.06    2.10   0
   7  -3  -8  117.45    2.53   0
   7   2  -7   47.01    1.83   0
   7   4  -6   13.94    1.75   0
   7   9  -1    0.02    1.61   0
   8  -1  -8   -0.56    1.69   0
   8   6  -5   95.61    2.53   0
   8   7  -4   21.29    1.81   0
  -1  -8   5  540.67    3.53   0
  -1  -8   6  532.16    3.65   0
  -1  -8   7  211.41    2.46   0
  -1  -8   8   33.83    1.36   0
  -1  -7   4  628.78    4.10   0
  -1  -7   9   15.63    1.62   0
  -1  -7  10  141.43    2.07   0
  -1  -6   3  455.73    3.56   0
  -1  -6  10   99.56    2.17   0
  -1  -5  11    1.31    1.32   0
  -1  -4  11   79.49    1.74   0
  -1  -3  11    0.09    1.19   0
  -1  -2  11  171.35    2.26   0
  -1  -1   3 4289.95   13.72   0
  -1  -1  10  353.48    3.32   0
  -1   0   4    0.70    1.31   0
  -1   0   9  164.74    2.52   0
  -1   1   6    3.21    1.14   0
  -1   1   7   77.00    2.03   0
  -1   1   8  483.05    4.05   0
   0 -11   4  163.10    2.16   0
   0 -11   8   58.43    2.34   0
   0   0  13    0.23    2.18   0
   1 -13   4   48.85    2.36   0
   1   5  11   48.88    2.52   0
   2  -1  -4  359.79    4.03   0
   2   2  -3  376.27    3.67   0
   3   0  -5  588.67    4.19   0
   3   4  -3   16.27    1.03   0
   3   7   0  118.95    1.98   0
   3   9   5   34.87    2.07   0
   3   9   6   74.62    2.84   0
   3   9   7    1.78    2.03   0
   4   0  -6   58.43    1.68   0
   5  -6  -7  369.76    4.38   0
   5  -1  -7   18.18    1.48   0
   5   2  -6   55.74    1.36   0
   5   4  -5   26.01    1.08   0
   5   9   0   12.79    1.29   0
   5  10   2   45.61    2.05   0
   6   1  -7  313.17    2.84   0
   6   5  -5  242.67    2.37   0
   6   9  -1   11.30    1.41   0
   6  10   1  160.74    2.48   0
   7  -6  -8    8.95    2.38   0
   7  -2  -8  179.31    2.50   0
   7  -1  -8  234.74    2.91   0
   7   6  -5   22.34    1.83   0
   7   7  -4   -0.79    1.33   0
   7   8  -3    2.75    1.46   0
   7   9  -2    4.90    2.00   0
   8   0  -8   -0.22    1.63   0
   8   3  -7   23.84    1.65   0
   8   5  -6   -0.03    1.58   0
  -1  -7   5  259.61    2.63   0
  -1  -7   6  636.16    3.91   0
  -1  -7   7   63.21    1.77   0
  -1  -7   8   -0.32    1.01   0
  -1  -6   4  232.43    2.65   0
  -1  -6   9    3.28    1.37   0
  -1  -5   3  307.33    3.03   0
  -1  -5  10  327.15    2.87   0
  -1  -4  10   45.44    1.40   0
  -1  -3  10  254.84    2.76   0
  -1  -2   3 2896.90   10.51   0
  -1  -2  10   44.25    1.43   0
  -1   0   8   -0.57    1.15   0
   0 -11   5    0.66    1.21   0
   0 -11   6    3.04    1.32   0
   0 -11   7    1.91    1.40   0
   0 -10   3  550.37    3.84   0
   0 -10   9    0.28    2.10   0
   0  -2  13   46.93    2.55   0
   0  -1  13   13.71    1.71   0
   0   1  12    8.41    1.76   0
   0   3  10    6.00    1.54   0
   0   4   8   77.71    2.46   0
   1 -13   5    0.38    1.67   0
   1 -12   2    0.38    1.25   0
   1  -9  -1    3.06    1.22   0
   1   4  12    2.96    2.30   0
   2   5  -1 1593.46    7.21   0
   2   7   2   57.60    1.80   0
   2   7  10   71.72    4.00   0
   3 -11  -3  316.07    5.46   0
   3   3  -4   75.13    1.72   0
   4   3  -5    2.71    0.83   0
   4   6  -3  256.79    2.55   0
   4   7  -2    0.32    0.89   0
   4   9   1   47.58    1.82   0
   4  10   5   42.66    2.45   0
   4  10   6    3.48    2.25   0
   4  10   7   68.42    3.29   0
   5   0  -7  324.83    3.06   0
   5   3  -6   11.02    1.29   0
   5   6  -4  118.12    1.77   0
   5   7  -3   99.70    1.81   0
   5   8  -2   26.56    1.31   0
   6  -4  -8   13.27    1.68   0
   6  -3  -8   19.69    1.63   0
   6   2  -7   58.88    1.53   0
   6   4  -6  136.15    1.90   0
   6   7  -4  327.84    3.00   0
   6   8  -3  156.28    2.42   0
   6  10   0   15.85    2.09   0
   7   0  -8    0.58    1.28   0
   7   3  -7   46.10    1.52   0
   7   5  -6    0.43    1.29   0
   8   1  -8   -0.08    1.63   0
   8   4  -7    0.82    2.26   0
  -1  -6   5 1532.29    6.00   0
  -1  -6   6  264.81    2.75   0
  -1  -6   7   46.24    1.50   0
  -1  -6   8  138.50    1.94   0
  -1  -5   4  352.60    3.22   0
  -1  -5   8    2.08    1.29   0
  -1  -5   9   97.71    1.73   0
  -1  -4   3   17.90    1.03   0
  -1  -4   9  275.83    2.66   0
  -1  -3   3  231.21    2.87   0
  -1  -3   9  324.99    3.01   0
  -1  -2   9   65.78    1.53   0
  -1  -1   4    3.70    1.24   0
  -1  -1   8  504.72    3.88   0
  -1  -1   9  237.84    2.58   0
  -1   0   5    9.70    1.01   0
  -1   0   6    0.14    1.17   0
  -1   0   7  331.64    3.31   0
   0 -10   4   87.18    1.71   0
   0 -10   5   30.91    1.59   0
   0 -10   7    0.98    1.67   0
   0 -10   8   -0.11    1.37   0
   0  -9   2    6.20    0.97   0
   0  -9  10   -0.28    1.59   0
   0  -8  11   26.48    1.80   0
   0  -6  12   -0.37    2.26   0
   0  -3  13   20.69    1.82   0
   0   0  12   86.23    2.32   0
   0   2  11    2.79    1.15   0
   0   4   5 1507.86   14.19   0
   0   4   7  196.93    3.86   0
   1 -12   3  125.41    2.09   0
   1  -7  -2  382.60    5.44   0
   1   1  -2 1090.36    7.81   0
   2 -12   0    0.11    1.72   0
   2   0  -4  364.54    3.79   0
   2   4  -2 1856.40    7.59   0
   2   6   0 1636.88    7.62   0
   2   8   5  432.55    6.16   0
   2   8   6    0.83    1.54   0
   3 -13  -1    8.82    1.69   0
   3 -12  -2   94.14    2.85   0
   3   1  -5  342.19    3.16   0
   3   6  -2   26.40    1.33   0
   3   8   1    2.04    0.91   0
   3   9   8   49.56    3.70   0
   4   1  -6    1.19    0.78   0
   4   5  -4  162.40    2.00   0
   4   8  -1  440.81    3.43   0
   4  10   4   92.98    2.36   0
   5  -7  -7    2.43    1.70   0
   5   1  -7   16.54    1.44   0
   5   5  -5  461.52    3.22   0
   5   9  -1  207.59    2.51   0
   5  10   1   16.44    1.46   0
   6  -5  -8   18.26    1.96   0
   6  -2  -8  456.68    3.73   0
   6  -1  -8   62.55    2.00   0
   6   6  -5    0.05    1.07   0
   6   9  -2    0.09    1.31   0
   7   1  -8  227.11    2.52   0
   7   4  -7   22.93    1.86   0
   7   7  -5   47.93    2.20   0
   7   8  -4    1.98    1.51   0
   7   9  -3   15.73    2.09   0
   8   2  -8    1.16    1.67   0
   8   6  -6   47.39    1.94   0
  -1  -5   5   70.62    1.56   0
  -1  -5   6 1243.09    5.34   0
  -1  -5   7  137.45    1.91   0
  -1  -4   4   90.81    1.72   0
  -1  -4   7   50.61    1.53   0
  -1  -4   8  340.81    2.86   0
  -1  -3   4   60.94    1.65   0
  -1  -3   8   62.52    1.44   0
  -1  -2   4    4.06    0.87   0
  -1  -2   8  193.45    2.36   0
  -1  -1   5   76.52    1.92   0
  -1  -1   6    4.76    1.09   0
  -1  -1   7   76.36    1.67   0
   0  -9   3   22.42    1.17   0
   0  -9   8  315.00    3.05   0
   0  -9   9  304.37    2.80   0
   0  -8  10  142.25    2.15   0
   0  -7  11   78.76    1.93   0
   0  -5  12    2.39    1.56   0
   0  -4  12    5.33    1.88   0
   0  -3  12   -1.88    1.95   0
   0  -2  12   42.04    2.11   0
   0  -1  12    8.88    1.46   0
   0   1  11  120.11    2.47   0
   0   3   9  385.55    4.27   0
   0   4   6    8.06    1.44   0
   1 -12   4    0.27    1.32   0
   1 -12   5  185.75    2.39   0
   1 -12   6   18.39    1.64   0
   1 -12   7   43.84    1.93   0
   1 -11   2  115.41    2.25   0
   1   2  13   92.20    2.75   0
   1   3  -1 3398.99   12.69   0
   1   4   0  553.87    5.33   0
   1   6   8   18.09    2.20   0
   2 -13   2    0.21    1.49   0
   2 -11  -1   84.97    2.28   0
   2 -10  -2    1.59    1.28   0
   2   3  -3  196.03    2.63   0
   2   8   7   94.48    5.88   0
   3   5  -3  162.28    2.08   0
   3   7  -1   30.74    1.18   0
   3   9   3  452.93    4.40   0
   4   2  -6  129.78    1.86   0
   4   4  -5   82.44    1.57   0
   4   9   0  147.51    2.46   0
   4  10   3    7.26    1.41   0
   5   4  -6  159.78    2.02   0
   5   7  -4  296.28    2.80   0
   5   8  -3  525.39    3.71   0
   5  11   4   36.24    2.74   0
   6  -6  -8    1.72    1.95   0
   6   0  -8  909.91    4.86   0
   6   3  -7  439.82    3.15   0
   6   5  -6  136.29    1.93   0
   6  10  -1   20.30    1.65   0
   6  11   1    0.73    2.22   0
   7   2  -8  178.15    2.32   0
   7   6  -6    2.50    1.43   0
  -1  -4   5  843.89    4.58   0
  -1  -4   6   56.65    1.41   0
  -1  -3   5    2.75    0.84   0
  -1  -3   6  113.68    1.83   0
  -1  -3   7    1.83    0.88   0
  -1  -2   5  819.78    4.95   0
  -1  -2   6  451.48    3.59   0
  -1  -2   7   30.85    1.17   0
   0  -9   4  236.03    2.45   0
   0  -9   5  192.94    2.37   0
   0  -9   6   14.59    1.41   0
   0  -9   7   20.94    1.26   0
   0  -8   2  241.02    2.67   0
   0  -8   9   26.37    1.46   0
   0  -7   1  135.93    2.20   0
   0  -7  10   48.48    1.54   0
   0  -6  11   27.02    1.58   0
   0  -5  11   66.57    2.06   0
   0   0  11   -0.37    1.60   0
   0   2  10  106.86    2.15   0
   1 -11   3    1.39    1.55   0
   1 -11   8   38.98    2.38   0
   1 -10   1   35.12    1.75   0
   1   1  13    3.96    2.33   0
   1   3  12    1.93    1.87   0
   1   4  11   -0.25    1.81   0
   1   5   1  732.81    6.39   0
   1   5  10    1.07    1.53   0
   1   6   3   14.11    1.57   0
   2 -13   3    0.00    1.61   0
   2 -13   4    0.49    2.32   0
   2   1  -4  363.93    3.54   0
   2   7   1  459.11    4.25   0
   3  -3  -6 1579.46    8.29   0
   3  -2  -6   49.86    1.70   0
   3   2  -5 1096.13    5.35   0
   3   4  -4   89.53    1.63   0
   3   8   0   32.97    1.25   0
   3   9   2   31.74    1.72   0
   4  -3  -7  571.68    4.63   0
   4  -2  -7  810.96    5.19   0
   4   6  -4   36.51    1.24   0
   4   7  -3   52.85    1.37   0
   4   8  -2   79.95    1.88   0
   4  10   2   71.06    2.02   0
   5   2  -7  386.52    3.05   0
   5   6  -5  116.76    1.78   0
   5   9  -2  120.72    1.99   0
   5  10   0   33.01    1.59   0
   5  11   3  113.66    2.59   0
   6   1  -8   66.49    1.65   0
   6   4  -7  236.41    2.37   0
   6   6  -6    8.28    1.56   0
   6   7  -5   42.29    1.52   0
   6   8  -4   10.10    1.34   0
   6   9  -3  223.98    2.52   0
   7  -4  -9   64.93    2.48   0
   7  -3  -9    9.15    2.20   0
   7  -2  -9   16.50    2.14   0
   7  -1  -9   19.46    2.00   0
   7   3  -8  112.67    2.01   0
   7   5  -7   23.48    1.55   0
   7   8  -5    0.76    1.96   0
   7   9  -4    2.28    2.17   0
   0  -8   3  707.27    4.32   0
   0  -8   7    0.96    1.37   0
   0  -8   8   84.10    1.69   0
   0  -7   9  198.84    2.25   0
   0  -6  10  293.92    2.76   0
   0  -4  11    1.65    1.25   0
   0  -3  11   -2.64    1.25   0
   0  -2  11    1.31    1.42   0
   0  -1  11  121.64    2.04   0
   0   1  10    1.07    1.41   0
   0   3   8    8.38    1.40   0
   1 -11   4  126.26    1.98   0
   1 -11   5   91.18    2.15   0
   1 -11   6   79.40    2.05   0
   1 -11   7    5.46    1.47   0
   1 -10   9    1.26    2.04   0
   1  -8  -1  696.38    5.92   0
   1   0  13    7.27    2.12   0
   2 -12   1   35.98    1.63   0
   2   5  -2   -1.68    1.13   0
   2   6  -1   10.23    1.35   0
   2   6  11    3.32    2.31   0
   2   8   3  123.23    2.86   0
   3 -13   0   25.49    1.80   0
   3  -4  -6    0.51    1.14   0
   3  -1  -6 1637.34    7.20   0
   3   3  -5   81.42    1.76   0
   3   6  -3  250.90    2.69   0
   3   7  -2    8.85    1.26   0
   4 -12  -3    0.63    2.17   0
   4 -11  -4    1.00    2.21   0
   4  -8  -6  215.98    5.90   0
   4  -4  -7   96.27    2.15   0
   4  -1  -7   90.11    1.83   0
   4   0  -7   -0.50    1.15   0
   4   3  -6   -0.99    0.96   0
   4   5  -5   44.40    1.25   0
   4   9  -1   24.57    1.65   0
   4  10   1   67.42    2.02   0
   5  -4  -8   48.40    1.90   0
   5  -3  -8   77.97    2.12   0
   5  -2  -8  106.57    1.94   0
   5  -1  -8   53.33    1.81   0
   5   3  -7  246.98    2.47   0
   5   5  -6  131.39    1.89   0
   5  10  -1   49.77    2.11   0
   5  11   2   69.18    2.16   0
   6  -7  -8   13.00    2.27   0
   6   2  -8  502.60    3.43   0
   6  10  -2   -0.14    1.48   0
   6  11   0    4.70    1.83   0
   7   0  -9    3.41    1.54   0
   7   4  -8   17.48    1.86   0
   7   7  -6   12.77    1.54   0
   0  -8   4   57.15    1.47   0
   0  -8   5  295.22    2.71   0
   0  -8   6   97.03    1.66   0
   0  -7   2  272.87    2.93   0
   0  -7   8  580.82    3.56   0
   0  -6   1  135.54    2.29   0
   0  -6   9    9.85    1.11   0
   0  -5  10   56.44    1.49   0
   0  -4  10  682.08    4.16   0
   0   0  10  141.03    2.36   0
   0   2   9    0.31    0.88   0
   1 -10   2  408.31    3.43   0
   1 -10   8   95.85    1.93   0
   1  -9  10   19.43    1.79   0
   1  -3  -3  233.17    6.34   0
   1  -2  -3 2840.12   16.51   0
   1  -2  13  101.52    2.26   0
   1  -1  13    4.57    1.75   0
   1   2  -2 2115.69    9.76   0
   1   2  12    0.05    1.40   0
   2 -12   2    0.07    1.28   0
   2   2  -4  200.81    2.55   0
   2   4  -3    1.06    0.70   0
   2   7   0  311.17    3.49   0
   3 -12  -1   33.78    2.13   0
   3   0  -6    1.06    0.84   0
   3   5  -4  623.28    3.86   0
   3   8  -1   95.08    1.95   0
   3   9   1  145.42    2.50   0
   4  -5  -7  704.40    6.00   0
   4   1  -7   95.78    1.92   0
   4   4  -6  353.90    3.01   0
   5  -8  -7  199.47    4.58   0
   5   0  -8   -0.76    1.03   0
   5   4  -7  278.49    2.70   0
   5   7  -5    1.90    1.07   0
   5   8  -4  158.27    2.03   0
   5   9  -3   28.19    1.74   0
   5  11   1    4.09    1.58   0
   6   3  -8   20.65    1.34   0
   6   5  -7   -0.05    1.25   0
   6   7  -6    2.08    1.60   0
   6   8  -5   64.00    1.70   0
   6   9  -4  270.35    2.69   0
   6  11  -1    6.93    2.51   0
   7   1  -9   24.81    1.62   0
   7   2  -9   17.28    1.96   0
   7   6  -7    1.50    1.48   0
   0  -7   3  148.13    2.10   0
   0  -7   4  108.03    1.96   0
   0  -7   6    0.62    1.30   0
   0  -7   7    7.06    1.02   0
   0  -6   8  206.23    2.26   0
   0  -5   9  272.01    2.57   0
   0  -3  10    3.98    1.07   0
   0  -2  10  108.01    1.86   0
   0  -1  10    5.01    1.01   0
   0   1   9   31.01    1.52   0
   0   3   7   33.88    1.73   0
   1 -10   3   33.91    1.30   0
   1 -10   4    1.36    1.32   0
   1 -10   5   52.08    1.78   0
   1 -10   6   70.15    1.86   0
   1 -10   7    3.67    1.24   0
   1  -9   9  144.14    2.12   0
   1  -8  10    0.56    1.54   0
   1  -7  11   15.69    1.60   0
   1  -6  -2   24.26    1.72   0
   1  -5  12    0.25    1.66   0
   1  -4  12    1.94    2.06   0
   1  -1  -3 4347.04   17.20   0
   1   1  12   92.45    2.14   0
   1   3  11  107.18    2.51   0
   1   5   9   74.44    2.48   0
   1   6   2    3.39    1.17   0
   2 -12   3   25.98    1.55   0
   2 -12   4    8.27    1.83   0
   2 -12   5  179.93    2.70   0
   2 -12   6   20.95    1.76   0
   2 -10  -1  380.12    4.20   0
   2  -8  -3  266.00    5.17   0
   2  -2  -5 3972.22   13.74   0
   2   8   2  398.80    4.27   0
   3 -13   1    0.00    1.57   0
   3  -9  -4    4.63    1.99   0
   3  -5  -6   60.95    2.24   0
   3   1  -6 1603.58    6.60   0
   3   4  -5   24.68    1.28   0
   4   2  -7  779.35    4.45   0
   4   6  -5    0.11    0.93   0
   4   7  -4    4.10    0.97   0
   4   8  -3    7.17    1.07   0
   4   9  -2   77.55    1.96   0
   4  10   0    0.26    1.15   0
   5 -11  -5    1.28    3.35   0
   5  -5  -8  143.78    2.59   0
   5   1  -8   50.85    1.50   0
   5   2  -8  101.81    1.96   0
   5   6  -6  138.96    1.92   0
   5  10  -2  131.54    2.49   0
   5  11   0    0.35    2.05   0
   6  -4  -9    7.71    1.98   0
   6  -3  -9   24.22    1.54   0
   6  -2  -9    6.81    1.32   0
   6  -1  -9  228.44    2.65   0
   6   0  -9   -0.00    1.26   0
   6   4  -8   13.64    1.72   0
   6   6  -7   62.25    2.04   0
   6  10  -3   93.18    2.08   0
   7   3  -9   12.70    1.95   0
   7   5  -8  157.50    2.28   0
   7   7  -7   62.91    2.49   0
   7   8  -6    7.34    1.75   0
   0  -7   5  125.99    1.84   0
   0  -6   2  241.49    2.82   0
   0  -6   7  217.33    2.29   0
   0  -5   1  389.85    4.04   0
   0  -5   8   30.52    1.41   0
   0  -4   9    2.86    1.01   0
   0  -3   9  375.03    3.22   0
   0   0   9   -1.24    1.19   0
   0   2   8  286.80    3.40   0
   1  -9   7    9.74    1.57   0
   1  -9   8    0.14    1.22   0
   1  -8   9   70.53    1.65   0
   1  -7  10   33.00    1.84   0
   1  -6  11   -0.12    1.44   0
   1  -3  12    0.49    1.44   0
   1  -2  12    0.08    1.41   0
   1  -1  12   91.32    2.02   0
   1   0  -3 9999.99   22.98   0
   1   0  12    0.29    1.42   0
   1   4  -1 1998.56    9.10   0
   1   4  10  437.37    4.44   0
   1   5   0 2376.68   10.30   0
   1   6   7  290.35    6.24   0
   2 -11   1    0.35    1.33   0
   2  -9  -2  244.88    3.89   0
   2  -3  -5  578.17    5.87   0
   2  -1  -5  123.62    2.35   0
   2   0  -5   -0.91    1.02   0
   2   3  -4  458.81    3.63   0
   2   4  12    0.08    2.30   0
   2   6  -2  632.15    4.36   0
   3 -13   2    0.95    1.63   0
   3 -13   3   -0.10    2.06   0
   3 -11  -2   86.93    2.46   0
   3   2  -6   47.80    1.36   0
   3   6  -4   -1.24    1.13   0
   3   7  -3  182.80    2.21   0
   3   9   0   94.22    1.92   0
   3  10   4    0.89    1.67   0
   3  10   5    6.86    2.22   0
   4 -13  -1   40.72    2.47   0
   4  -6  -7   66.14    2.34   0
   4   3  -7  556.49    3.74   0
   4   5  -6    1.55    1.24   0
   4  11   3   87.62    2.73   0
   4  11   4    0.42    1.58   0
   4  11   5    1.46    2.36   0
   5   5  -7   92.79    1.67   0
   5   8  -5  119.62    2.13   0
   5   9  -4  176.38    2.44   0
   6  -5  -9    4.91    1.88   0
   6   1  -9  239.56    2.57   0
   6   2  -9    7.47    1.59   0
   6   8  -6   11.63    1.83   0
   6   9  -5    0.75    2.02   0
   6  11  -2    0.00    1.76   0
   7   4  -9   70.87    2.36   0
   7   6  -8    7.30    2.26   0
   0  -6   3  298.04    2.92   0
   0  -6   4 1083.88    5.36   0
   0  -6   5  110.79    1.80   0
   0  -6   6  234.80    2.47   0
   0  -5   7   43.43    1.47   0
   0  -4   8   73.85    1.52   0
   0  -2   9    0.07    0.86   0
   0  -1   9   31.46    1.24   0
   0   1   8    0.50    1.14   0
   0   3   6  523.20    5.64   0
   1  -9   2  119.84    1.94   0
   1  -9   6   61.38    1.50   0
   1  -8   8  286.44    2.75   0
   1  -7  -1  148.28    2.94   0
   1  -6  10  110.87    2.21   0
   1  -5  11   39.49    1.60   0
   1  -4  11    0.45    1.70   0
   1   2  11    2.78    1.25   0
   1   3  -2  848.36    5.83   0
   2 -11   2   25.14    1.60   0
   2 -11   6   33.45    1.93   0
   2 -11   7   67.24    1.89   0
   2   1  -5  127.09    2.24   0
   2   5  -3  123.44    1.95   0
   2   7  -1 1470.24    6.69   0
   2   7   9   12.49    2.30   0
   2   8   1  261.64    3.21   0
   3 -10  -3   74.36    2.65   0
   3   3  -6 1601.04    6.30   0
   3   5  -5   66.28    1.60   0
   3   8  -2  145.49    2.07   0
   3  10   2  593.77    5.05   0
   3  10   3  187.30    3.05   0
   4   7  -5    6.83    1.35   0
   4   8  -4    1.09    0.96   0
   4   9  -3  123.16    2.09   0
   4  10  -1  209.15    2.58   0
   4  11   2  191.22    2.93   0
   5  -6  -8   -0.23    1.28   0
   5   3  -8   85.25    1.68   0
   5   7  -6   58.08    1.54   0
   5  10  -3  105.25    1.95   0
   5  11  -1  290.05    3.04   0
   6  -8  -8    0.00    2.39   0
   6   3  -9   19.78    1.87   0
   6   5  -8   18.77    1.44   0
   6   7  -7    1.42    1.42   0
   6  10  -4    0.68    1.59   0
   7   0 -10   -0.19    1.72   0
   0  -5   2  615.96    4.58   0
   0  -5   6  665.19    3.97   0
   0  -4   1 1190.78    7.38   0
   0  -4   7  189.12    2.36   0
   0  -3   8    8.11    0.96   0
   0  -2   8  272.87    2.75   0
   0  -1   8   -0.71    1.13   0
   0   0   8    6.75    0.94   0
   0   2   1   33.48    3.81   0
   0   2   7   41.65    1.49   0
   1  -9   3  112.91    1.85   0
   1  -9   4   56.34    1.39   0
   1  -9   5  388.39    2.98   0
   1  -8   7    1.70    1.31   0
   1  -7   9   12.21    1.28   0
   1  -5  10   -2.42    1.48   0
   1  -3  11  107.20    1.95   0
   1  -2  11    3.65    1.53   0
   1  -1  11    9.45    1.67   0
   1   0  11  209.31    2.73   0
   1   1  -3 4328.63   13.68   0
   1   1  11   11.10    1.29   0
   1   3  10  140.62    2.64   0
   1   6   1   22.61    1.35   0
   2 -11   3   22.68    1.33   0
   2 -11   4  112.10    1.99   0
   2 -11   5   22.86    1.44   0
   2 -10   8    5.54    1.50   0
   2  -9   9   -0.78    2.07   0
   2  -8  10    0.05    2.11   0
   2  -7  11   13.35    2.14   0
   2  -4  -5  359.35    5.35   0
   2   2  -5 3953.22   10.65   0
   2   3  12    0.00    2.13   0
   2   4  -4   36.01    1.20   0
   2   5  11  141.32    2.89   0
   2   6  10   15.04    2.06   0
   3 -12   1   33.26    2.08   0
   3   9  -1   28.29    1.31   0
   3  10   6   14.67    2.48   0
   4 -13   0    0.44    1.79   0
   4 -12  -2   39.99    2.39   0
   4  -3  -8    1.85    1.34   0
   4  -2  -8   16.42    1.25   0
   4  -1  -8   24.19    1.24   0
   4   0  -8   15.53    1.11   0
   4   1  -8   24.27    1.46   0
   4   4  -7   99.72    1.71   0
   4   6  -6  378.40    2.87   0
   4  10  -2  207.23    2.60   0
   4  11   1  183.90    2.70   0
   5  -3  -9    8.61    1.53   0
   5  -2  -9    0.48    1.11   0
   5  -1  -9    7.96    1.23   0
   5   0  -9    0.06    1.12   0
   5   4  -8   48.44    1.45   0
   5   6  -7  387.48    2.97   0
   5  11  -2   48.86    2.28   0
   5  12   1    0.00    1.85   0
   6  -6  -9    7.19    2.25   0
   6   4  -9    8.65    1.81   0
   6   6  -8    1.22    1.41   0
   6   9  -6   -0.45    1.95   0
   0  -5   3  315.64    3.09   0
   0  -5   4  141.44    2.05   0
   0  -5   5  753.84    4.27   0
   0  -4   6    8.04    1.19   0
   0  -3   7   37.64    1.28   0
   0   1   7  372.53    3.83   0
   0   3   5 1931.06   12.03   0
   1  -8   1   23.96    1.17   0
   1  -8   6  129.36    1.89   0
   1  -7   8   12.13    1.16   0
   1  -6   9  181.17    2.11   0
   1  -4  10  430.85    3.22   0
   1   2  -3 2824.98   10.35   0
   1   2  10   72.32    2.06   0
   1   4   9  401.60    4.59   0
   1   5  -1 1563.20    7.70   0
   1   5   8    7.64    1.54   0
   2 -10   6    0.27    1.70   0
   2 -10   7    6.18    1.38   0
   2  -6  11    5.34    2.12   0
   2  -4  12    0.70    1.68   0
   2   2  12   67.09    2.50   0
   2   6  -3    1.86    1.06   0
   2   7  -2  300.80    3.05   0
   2   8   0 1066.35    5.92   0
   3 -12   2  161.49    2.46   0
   3 -12   3    0.01    1.92   0
   3 -12   4    0.60    1.92   0
   3 -12   5    1.88    1.65   0
   3 -11  -1    2.70    1.56   0
   3  -2  -7  519.68    4.25   0
   3  -1  -7   91.35    1.83   0
   3   0  -7  589.20    4.12   0
   3   1  -7   99.10    1.93   0
   3   4  -6    0.89    0.79   0
   3   6  -5  128.58    2.01   0
   3   7  -4  237.02    2.39   0
   3   8  -3  121.31    1.86   0
   3  10   1    0.58    1.10   0
   4  -4  -8  122.26    2.48   0
   4   2  -8   17.62    1.10   0
   4   5  -7  721.89    4.12   0
   4   8  -5  273.30    2.69   0
   4  11   0   78.23    1.96   0
   5   1  -9    6.66    1.15   0
   5   2  -9    0.38    1.49   0
   5   5  -8  150.54    1.96   0
   5   7  -7    2.33    1.66   0
   5   8  -6   -0.48    1.25   0
   5   9  -5   16.01    1.35   0
   5  10  -4   46.97    1.64   0
   5  12   0    5.90    1.90   0
   6  -2 -10    0.01    2.01   0
   6  -1 -10    1.09    1.42   0
   6   0 -10    5.96    1.45   0
   6   1 -10    0.73    1.80   0
   6   8  -7    0.09    1.54   0
   6  10  -5   44.69    1.93   0
   0  -4   2  157.52    2.48   0
   0  -4   5 1503.73    6.27   0
   0  -3   6  502.42    3.78   0
   0  -2   7   40.72    1.30   0
   0  -1   7  378.56    3.35   0
   0   0   7    0.17    0.81   0
   0   2   6   13.90    1.19   0
   0   3   4   92.29    3.43   0
   1  -8   2   64.05    1.48   0
   1  -8   3  119.71    1.93   0
   1  -8   4  186.29    2.23   0
   1  -8   5   79.23    1.54   0
   1  -7   7   69.62    1.48   0
   1  -6   8   15.63    1.11   0
   1  -5   9   75.75    1.58   0
   1  -3  10  132.09    2.00   0
   1  -2  10   68.58    1.87   0
   1   1  10  279.91    3.21   0
   1   4  -2 2420.53    9.26   0
   1   6   0  249.98    3.38   0
   2 -10   1   94.96    1.88   0
   2 -10   2   47.45    1.72   0
   2 -10   4   45.16    1.72   0
   2 -10   5  353.67    2.93   0
   2  -9  -1  182.91    2.99   0
   2  -9   8   12.14    1.44   0
   2  -8   9   37.89    1.59   0
   2  -7  10   67.24    1.79   0
   2  -5  11  149.43    2.56   0
   2  -3  12    0.00    1.56   0
   2  -2  12   68.65    2.24   0
   2  -1  12   27.62    2.15   0
   2   0  12    1.38    2.03   0
   2   1  12   30.13    2.04   0
   2   3  -5  565.50    3.93   0
   2   4  11   17.32    2.07   0
   2   5  -4 1114.70    5.33   0
   2   8  -1    4.32    1.31   0
   2   9   2  348.06    4.08   0
   2   9   3    4.25    1.47   0
   2   9   4  105.64    3.08   0
   3 -11   7   62.25    1.98   0
   3  -6  -6    6.47    1.42   0
   3  -3  -7   37.58    1.47   0
   3   2  -7  519.13    3.56   0
   3   5  -6   54.40    1.60   0
   3   9  -2  118.04    1.95   0
   3  10   0  232.04    2.82   0
   4   3  -8    2.82    0.99   0
   4   7  -6  128.47    1.91   0
   4   9  -4   24.21    1.22   0
   4  10  -3   26.29    1.71   0
   4  11  -1   42.76    1.66   0
   5  -7  -8   49.84    2.47   0
   5  -4  -9   11.63    1.41   0
   5   3  -9    7.64    1.23   0
   5   6  -8   -0.28    1.57   0
   5  11  -3   12.84    1.61   0
   5  12  -1    1.01    1.82   0
   6  -3 -10   11.48    1.65   0
   6   2 -10    5.21    1.48   0
   6   5  -9    5.96    1.52   0
   6   7  -8    9.19    1.58   0
   0  -4   3   14.45    1.00   0
   0  -4   4  248.99    2.64   0
   0  -3   1  429.54    4.85   0
   0  -3   5 2008.16    7.52   0
   0  -2   6   16.82    0.99   0
   0  -1   6  487.45    3.92   0
   0   1   6  479.65    4.43   0
   0   3   3  551.20   11.65   0
   1  -7   6  117.38    1.79   0
   1  -6   7  277.37    2.68   0
   1  -5   8    7.84    1.32   0
   1  -4   9  391.43    3.04   0
   1  -1  10  265.48    2.72   0
   1   0  10    0.57    0.97   0
   1   3  -3  234.53    3.03   0
   1   3   9   94.25    2.37   0
   1   7   3  107.87    3.17   0
   2 -10   3   -0.60    1.01   0
   2  -9   7   65.02    1.62   0
   2  -8   8  137.70    2.20   0
   2  -7   9    9.48    1.70   0
   2  -6  10   12.72    1.38   0
   2  -4  11   18.06    1.81   0
   2   4  -5  351.58    3.12   0
   2   9   1    0.76    1.24   0
   3 -11   6   -0.52    1.57   0
   3 -10   8   -0.34    1.70   0
   3  -9   9  151.30    2.75   0
   3  -4  -7   30.97    1.60   0
   3   3  -7   41.39    1.28   0
   3   7  -5  135.70    2.07   0
   3   8  -4   65.50    1.47   0
   3  10  -1   -0.04    1.41   0
   4 -12  -1   87.57    2.26   0
   4 -11  -3    6.09    1.73   0
   4   4  -8  124.69    1.83   0
   4   6  -7   68.04    1.55   0
   4  11  -2   -0.06    1.67   0
   4  12   2   21.24    2.39   0
   4  12   3    0.64    2.31   0
   5  -5  -9    3.02    1.64   0
   5   4  -9   10.23    1.30   0
   5   8  -7  213.52    2.32   0
   5   9  -6   34.88    1.50   0
   5  10  -5    0.76    1.46   0
   5  11  -4   -0.01    1.96   0
   5  12  -2   22.71    2.51   0
   6  -4 -10    9.60    1.67   0
   6   3 -10   12.62    1.59   0
   6   4 -10   11.43    1.95   0
   6   6  -9    4.70    1.62   0
   6   8  -8   -0.08    2.29   0
   6   9  -7   -0.29    1.75   0
   0  -3   2 1769.02    8.54   0
   0  -3   3  530.52    4.39   0
   0  -3   4   86.16    1.78   0
   0  -2   5  300.64    3.13   0
   0   0   6   41.14    1.35   0
   0   2   5  290.14    4.18   0
   1  -7   1  799.87    5.19   0
   1  -7   4   92.58    1.82   0
   1  -7   5  475.79    3.39   0
   1  -6  -1  918.79    7.35   0
   1  -5  -2  303.35    5.89   0
   1  -3   9   92.08    1.69   0
   1  -2   9  365.80    3.17   0
   1   2   9  368.36    3.79   0
   1   5  -2  312.04    3.33   0
   1   7   2    4.71    1.32   0
   1   7   4   92.99    3.89   0
   2  -9   5   28.59    1.62   0
   2  -9   6  471.99    3.33   0
   2  -8  -2  693.62    6.42   0
   2  -5  10   38.41    1.87   0
   2  -3  11   53.18    1.66   0
   2  -2  -6 3410.50   12.13   0
   2  -1  -6   31.12    1.31   0
   2   0  -6  801.48    5.07   0
   2   1  -6   28.82    1.24   0
   2   3  11   53.16    1.83   0
   2   5  10   36.69    2.07   0
   2   6  -4    7.16    0.87   0
   2   7  -3  161.94    2.19   0
   2   8  -2  706.61    4.52   0
   2   8   7   94.68    5.79   0
   2   9   0  116.85    2.23   0
   2   9   5   31.30    2.62   0
   3 -11   1  161.72    2.37   0
   3 -11   2    3.95    1.73   0
   3 -11   3  164.12    2.59   0
   3 -11   4    2.36    1.29   0
   3 -11   5    0.46    1.38   0
   3 -10  -2  543.64    5.11   0
   3 -10   7    1.36    1.45   0
   3  -6  11    1.03    2.27   0
   3   4  -7   25.65    1.16   0
   3   6  -6    5.51    0.89   0
   3   6  11    1.08    2.42   0
   3   9  -3   99.04    1.81   0
   3  11   2    9.83    1.69   0
   3  11   3  183.54    3.36   0
   4  -7  -7  230.51    5.17   0
   4  -5  -8  129.96    2.87   0
   4  -1  -9  304.46    3.21   0
   4   0  -9   -0.18    1.35   0
   4   1  -9  301.17    2.99   0
   4   5  -8  132.37    2.14   0
   4   7  -7  229.74    2.60   0
   4   8  -6  224.91    2.40   0
   4   9  -5   43.63    1.47   0
   4  10  -4  108.60    1.94   0
   4  12   0   22.60    2.05   0
   4  12   1    4.69    1.60   0
   4  12   4   19.28    2.07   0
   5 -12  -3   -0.05    2.18   0
   5  -1 -10   21.53    1.85   0
   5   0 -10    0.18    1.71   0
   5   1 -10   18.54    1.85   0
   5   5  -9    3.39    1.29   0
   5   7  -8   46.67    1.63   0
   6  -5 -10    0.60    2.13   0
   6   5 -10    0.33    2.05   0
   0  -2   1   32.99    2.14   0
   0  -2   4  146.87    2.49   0
   0  -1   5 2384.42    8.91   0
   0   0   5   -0.20    1.11   0
   0   1   5 2463.14   10.51   0
   1  -7   2    4.92    0.84   0
   1  -7   3  110.17    1.82   0
   1  -6   6   94.58    1.66   0
   1  -5   7   34.05    1.19   0
   1  -4   8    1.53    0.87   0
   1  -1  -4    1.02    1.08   0
   1  -1   9   29.60    1.24   0
   1   0  -4    2.59    1.00   0
   1   0   9  723.81    4.62   0
   1   1  -4    0.54    0.84   0
   1   1   9   27.05    1.27   0
   1   4  -3   31.25    1.23   0
   1   4   8    0.96    0.93   0
   1   6  -1  966.73    5.81   0
   1   6   6   96.53    4.17   0
   1   7   1  817.05    6.15   0
   2  -9   1    0.53    1.19   0
   2  -9   3    2.97    1.36   0
   2  -9   4   96.00    1.72   0
   2  -8   7   99.54    1.68   0
   2  -7   8   63.73    1.48   0
   2  -6   9    0.07    1.10   0
   2  -4  10    1.58    1.55   0
   2  -2  11    2.31    1.30   0
   2  -1  11   57.69    1.69   0
   2   0  11    0.24    1.57   0
   2   1  11   55.72    1.74   0
   2   2  -6 3525.29    9.58   0
   2   2  11    1.08    1.32   0
   2   3  -6    5.78    1.25   0
   2   5  -5  122.50    1.86   0
   2   6   9    0.04    1.59   0
   3 -10   6   10.17    1.35   0
   3  -9   8   42.07    1.69   0
   3  -8   9   73.25    1.82   0
   3  -7  10    0.14    1.56   0
   3  -3  12   15.23    1.81   0
   3   0  -8   -0.98    1.22   0
   3   1  -8    9.82    1.38   0
   3   5  -7  551.16    3.59   0
   3   8  -5   64.94    1.80   0
   3  10  -2  583.45    4.01   0
   3  11   1  181.88    2.73   0
   3  11   4    5.59    1.92   0
   4 -12   1    3.31    1.47   0
   4 -12   2   11.97    1.99   0
   4 -12   3    0.22    1.58   0
   4 -12   4   12.92    1.77   0
   4  -2  -9   16.32    1.26   0
   4   2  -9   18.68    1.18   0
   4   3  -9  128.56    2.10   0
   4  11  -3    4.64    1.36   0
   4  12  -1   99.05    2.45   0
   5  -2 -10  153.57    2.40   0
   5   2 -10  150.62    2.15   0
   5   3 -10   73.50    2.13   0
   5   6  -9    8.73    1.95   0
   5   9  -7   39.59    1.64   0
   5  10  -6    5.16    1.56   0
   5  11  -5    1.44    2.35   0
   5  12  -3    0.00    1.88   0
   6  -1 -11   19.77    2.31   0
   6   0 -11    0.26    1.66   0
   6   1 -11   16.25    1.76   0
   0  -2   2  210.08    3.61   0
   0  -2   3 1037.98    6.39   0
   0  -1   4  136.57    2.57   0
   0   2   4  145.92    3.47   0
   1  -6   5  132.81    1.89   0
   1  -5   6   48.10    1.52   0
   1  -4   7  305.23    2.82   0
   1  -3   8  354.78    2.93   0
   1   2  -4    0.96    0.86   0
   1   5   7   34.22    1.95   0
   1   7   0  434.28    4.21   0
   2  -9   2  337.98    3.04   0
   2  -8   6    0.88    1.01   0
   2  -7  -3  170.46    4.17   0
   2  -7   7    2.64    1.39   0
   2  -5   9   53.84    1.64   0
   2  -3  -6    5.16    1.18   0
   2  -3  10   30.35    1.68   0
   2   4  -6  412.90    3.23   0
   2   4  10    2.41    1.51   0
   2   7  -4  124.68    1.87   0
   2   8  -3  278.76    2.90   0
   2   9  -1  184.51    2.46   0
   3 -10  -1    0.15    1.28   0
   3 -10   5    4.41    1.25   0
   3  -9   7    3.06    1.67   0
   3  -6  10    0.69    1.95   0
   3  -5  11   39.70    1.79   0
   3  -2  -8  842.23    5.54   0
   3  -2  12   46.58    1.96   0
   3  -1  -8    7.24    0.91   0
   3  -1  12  198.12    3.00   0
   3   0  12   -0.47    2.22   0
   3   1  12  217.09    3.21   0
   3   2  -8  831.45    4.55   0
   3   2  12   51.61    2.41   0
   3   3  -8  230.14    2.56   0
   3   7  -6    0.02    0.97   0
   3   7  10    0.17    2.26   0
   3   9  -4    5.72    1.03   0
   3  10  -3   85.13    2.01   0
   3  11   0   93.63    1.98   0
   4 -11  -2   -0.05    1.60   0
   4 -11   6  224.13    2.77   0
   4 -10  -4   96.00    3.04   0
   4  -3  -9  129.32    2.55   0
   4   4  -9   17.57    1.62   0
   4   6  -8  230.69    2.36   0
   4   8  -7    6.14    1.19   0
   4   9  -6   95.17    1.90   0
   4  10  -5  443.46    3.32   0
   4  12  -2   42.06    2.10   0
   5 -12  -2   19.26    2.48   0
   5  -6  -9    8.59    1.89   0
   5  -3 -10   78.09    2.03   0
   5   4 -10  191.85    2.35   0
   5   8  -8  273.09    2.73   0
   6  -2 -11   13.24    1.84   0
   0   0   4 1725.59    8.84   0
   0   1   4  130.50    2.94   0
   1  -6   3   13.88    1.21   0
   1  -6   4   58.94    1.39   0
   1  -2  -4    2.85    1.23   0
   1  -2   8   -1.82    0.93   0
   1  -1   8  629.42    4.30   0
   1   3  -4   61.08    1.54   0
   1   3   8  365.14    3.92   0
   1   5  -3  298.07    3.01   0
   1   6  -2   24.22    1.17   0
   2  -8  -1    3.62    1.32   0
   2  -8   5  416.73    3.19   0
   2  -6   8    2.76    1.05   0
   2  -5  -5  128.22    4.51   0
   2  -4   9    0.01    1.35   0
   2  -2  10   22.34    1.28   0
   2   3  10   32.55    1.86   0
   2   6  -5   96.17    1.64   0
   2   7   8   67.80    2.87   0
   2   9  -2  266.95    2.93   0
   3 -10   3  180.21    2.51   0
   3 -10   4    0.20    1.10   0
   3  -9  -3   95.97    2.66   0
   3  -9   6   67.87    1.96   0
   3  -8   8    7.51    1.31   0
   3  -7   9   67.66    1.73   0
   3  -5  -7  533.98    5.99   0
   3  -4  11   -0.18    1.52   0
   3   4  -8  375.42    3.09   0
   3   5  11   43.61    2.05   0
   3   6  -7   25.73    1.18   0
   3   9  -5  158.93    2.26   0
   3  11  -1    2.92    1.22   0
   3  11   5    0.04    1.89   0
   4 -11   5    0.65    1.56   0
   4 -10   7   67.74    2.03   0
   4   5  -9   19.47    1.25   0
   4   7  -8   55.53    1.54   0
   4  11  -4   -0.56    1.46   0
   5 -11  -4   -0.05    2.15   0
   5  -4 -10  203.27    3.30   0
   5   5 -10   12.35    1.49   0
   5   7  -9   39.71    1.64   0
   5   9  -8   34.03    1.84   0
   5  10  -7   15.03    1.73   0
   0  -1   1 1197.27   10.54   0
   0  -1   2   80.84    2.77   0
   0  -1   3 1414.61    8.05   0
   0   2   0 3445.57   19.68   0
   1  -6   1   22.14    1.16   0
   1  -6   2    3.95    0.86   0
   1  -5   5  129.16    1.91   0
   1  -4   6  606.09    3.81   0
   1  -3   7    6.22    0.89   0
   1   0   8    0.82    0.90   0
   1   1   8  597.01    4.38   0
   1   2   8    0.81    0.85   0
   1   4  -4   81.29    1.64   0
   1   7  -1  142.29    2.28   0
   2  -8   3  122.31    2.13   0
   2  -8   4   89.38    1.71   0
   2  -7   6   38.34    1.28   0
   2  -6   7  319.19    2.86   0
   2  -5   8   30.60    1.21   0
   2  -1  10   41.96    1.42   0
   2   0  -7    0.46    1.11   0
   2   0  10    7.12    1.13   0
   2   1  -7  132.27    2.02   0
   2   1  10   42.82    1.71   0
   2   2  -7  137.19    2.19   0
   2   2  10   20.58    1.30   0
   2   5  -6   11.67    0.97   0
   2   7  -5  231.41    2.56   0
   2   8  -4    0.16    1.19   0
   2  10   0    1.39    1.35   0
   2  10   1   93.68    2.09   0
   2  10   2   47.73    1.72   0
   2  10   3    0.86    1.43   0
   3 -10   1    0.76    1.06   0
   3 -10   2  569.22    4.06   0
   3  -8   7  177.50    2.43   0
   3  -6   9  182.98    2.49   0
   3  -5  10   -0.22    1.25   0
   3  -3  -8  224.25    3.01   0
   3  -3  11   48.20    1.69   0
   3  -2  11   34.48    2.09   0
   3   4  11   -0.31    2.13   0
   3   5  -8   37.82    1.57   0
   3   7  -7   70.69    1.77   0
   3   8  -6  154.26    2.02   0
   3   8   9   81.63    3.34   0
   3   9   8   51.23    3.92   0
   3  10  -4    0.43    1.12   0
   3  11  -2   92.16    1.89   0
   4 -11  -1   38.04    1.72   0
   4 -11   0   70.46    2.23   0
   4 -11   3   73.88    2.13   0
   4 -11   4    0.56    1.46   0
   4 -10   6    0.55    1.89   0
   4  -9   8    9.47    1.74   0
   4  -8   9    9.24    1.73   0
   4  -6  -8  224.85    4.19   0
   4  -4  -9   17.29    1.72   0
   4   0 -10  119.91    2.25   0
   4   1 -10   -0.59    1.56   0
   4   2 -10   25.56    1.67   0
   4   6  -9    1.90    1.72   0
   4   8  -8  220.67    2.60   0
   4   9  -7  187.76    2.22   0
   4  10  -6   34.33    1.60   0
   4  11  -5    0.10    1.44   0
   4  12  -3    0.13    1.61   0
   4  13   0    1.02    2.49   0
   5 -12  -1    0.36    1.74   0
   5 -12   0    5.04    2.38   0
   5   0 -11  182.61    2.84   0
   5   1 -11    2.63    1.44   0
   5   2 -11   26.63    2.16   0
   5   6 -10   53.04    1.81   0
   5   8  -9    1.17    1.73   0
   0   0   3    1.11    1.06   0
   0   2   3 1064.32   10.98   0
   0   3   1  439.41    8.03   0
   1  -5   4   13.58    0.95   0
   1  -2   7   11.65    0.96   0
   1   1  -5   78.37    1.91   0
   1   2  -5  800.54    4.95   0
   1   4   7  307.35    4.20   0
   1   5  -4  355.38    3.23   0
   1   6  -3  451.83    3.60   0
   1   7  -2  403.26    3.60   0
   1   8   1   24.77    1.58   0
   1   8   2   62.35    2.17   0
   2  -8   1  260.04    2.96   0
   2  -8   2  387.14    3.40   0
   2  -7   5  401.36    3.06   0
   2  -6  -4    7.04    2.25   0
   2  -3   9  475.81    3.30   0
   2  -1  -7  134.11    2.25   0
   2   3  -7  226.32    2.41   0
   2   4  -7   14.98    1.28   0
   2   5   9   57.97    1.91   0
   2   6  -6   16.77    1.06   0
   2   9  -3   30.51    1.23   0
   2  10  -1  371.44    3.34   0
   3  -9   5   31.90    1.38   0
   3  -7   8  366.88    2.91   0
   3  -4  10    0.53    1.22   0
   3  -1  11  136.33    2.14   0
   3   0  -9   31.54    1.52   0
   3   0  11   28.15    1.98   0
   3   1  -9   74.47    1.89   0
   3   2  -9   56.92    1.73   0
   3   3  11   46.65    2.12   0
   3   6  -8   58.16    1.73   0
   3   6  10    1.32    2.00   0
   3   9  -6   51.83    1.79   0
   3  11  -3  324.17    3.06   0
   3  12   0   20.15    2.02   0
   3  12   1   40.25    2.28   0
   3  12   2  178.05    3.39   0
   4 -11   1  159.34    2.40   0
   4 -11   2  172.19    2.41   0
   4 -10   5   34.43    2.02   0
   4  -9  -5   41.30    2.89   0
   4  -9   7   44.54    2.02   0
   4  -6  10   10.77    2.06   0
   4  -4  11    0.95    2.30   0
   4  -1 -10    0.05    1.11   0
   4   3 -10   15.32    1.33   0
   4   4 -10  174.62    2.50   0
   4   7  -9   25.26    1.78   0
   4  12  -4    5.17    1.65   0
   4  13  -1   47.90    2.18   0
   5 -12   1    0.00    1.69   0
   5  -2 -11   29.80    2.24   0
   5  -1 -11    1.01    1.44   0
   5   3 -11   14.08    1.60   0
   5   4 -11   22.34    1.71   0
   0   1   3 1434.06   10.36   0
   0   3   0    3.17    1.75   0
   1  -5  -1 1537.39   10.12   0
   1  -5   3  627.89    4.27   0
   1  -4   5  110.46    1.78   0
   1  -3   6    1.16    0.81   0
   1  -1   7   99.84    1.80   0
   1   0  -5   12.00    0.95   0
   1   3  -5    2.31    0.84   0
   1   8   0  539.77    4.53   0
   2  -7   4   54.20    1.79   0
   2  -6   6    6.12    0.93   0
   2  -5   7   17.09    1.06   0
   2  -4  -6  404.67    5.35   0
   2  -4   8  105.66    1.74   0
   2  -2  -7  136.41    2.57   0
   2  -2   9   16.14    1.17   0
   2  -1   9 1044.09    5.38   0
   2   4   9    0.36    1.39   0
   2   5  -7   20.38    1.38   0
   2   8  -5    2.30    0.99   0
   2   9  -4    0.78    1.36   0
   2  10  -2   -0.13    1.11   0
   2  10   4   49.15    2.51   0
   3  -9  -2  120.26    2.47   0
   3  -9   4  154.74    2.10   0
   3  -8   6    0.09    1.03   0
   3  -7   7  159.92    2.29   0
   3  -6   8   27.45    1.67   0
   3  -5   9   32.96    1.39   0
   3  -3  10   33.51    1.48   0
   3  -1  -9   67.05    1.89   0
   3   1  11  135.36    2.29   0
   3   2  11   39.43    1.72   0
   3   3  -9    0.83    0.94   0
   3   4  -9   16.41    1.44   0
   3   8  -7   16.89    1.19   0
   3  10  -5   52.04    1.49   0
   3  11  -4   -0.19    1.74   0
   3  12  -1   37.11    1.70   0
   3  12   3   -0.07    2.10   0
   4 -10  -3   26.45    1.83   0
   4 -10   4   87.91    2.19   0
   4  -8   8  153.45    2.19   0
   4  -7   9   35.78    1.68   0
   4  -2 -10   28.53    1.40   0
   4   5 -10   40.94    1.56   0
   4   9  -8   16.95    1.60   0
   4  10  -7    2.65    1.51   0
   4  11  -6  106.51    2.09   0
   4  12  -5   66.54    2.36   0
   5 -11  -3   10.73    2.13   0
   5 -11   4   31.31    2.46   0
   5  -5 -10   11.37    2.14   0
   0   0   2 2664.04   14.77   0
   0   2  -1   32.96    2.26   0
   1  -5   1  762.58    5.41   0
   1  -5   2    9.94    0.92   0
   1  -4   4  327.51    3.13   0
   1  -2   6    5.08    1.01   0
   1  -1  -5   77.83    2.00   0
   1   0   7   24.29    1.08   0
   1   1   7   97.64    1.89   0
   1   2   7    8.49    1.22   0
   1   3   7    8.12    1.06   0
   1   4  -5  855.52    4.76   0
   1   6  -4  221.43    2.49   0
   1   7  -3   91.69    1.71   0
   1   8  -1  675.76    4.69   0
   1   8   3  121.07    3.36   0
   2  -7  -2  298.74    4.32   0
   2  -7   3 1850.73    6.95   0
   2  -3   8  216.57    2.30   0
   2   0   9   -1.87    1.07   0
   2   1   9 1094.87    5.79   0
   2   2   9   13.60    1.50   0
   2   3   9  474.41    4.27   0
   2   6  -7   17.83    1.25   0
   2   6   8    3.56    1.45   0
   2   7  -6   -0.58    0.86   0
   2  10  -3  632.31    4.23   0
   3  -9   2   34.55    1.70   0
   3  -9   3  419.96    3.26   0
   3  -8  -4   65.62    2.74   0
   3  -8   5   -0.40    1.03   0
   3  -4  -8  350.71    4.16   0
   3  -4   9  104.23    2.03   0
   3  -2  -9   62.35    1.93   0
   3  -2  10   20.44    1.33   0
   3   5  -9    1.22    1.09   0
   3   5  10   -1.70    1.92   0
   3   7  -8   19.42    1.25   0
   3   9  -7   31.23    1.88   0
   3  10  -6  107.13    2.27   0
   3  12  -2  114.85    2.17   0
   4 -10   3    4.99    1.69   0
   4  -9   6  260.23    2.60   0
   4  -8   7  135.80    2.37   0
   4  -6   9   94.42    2.33   0
   4  -5  -9   22.39    1.86   0
   4  -5  10   -0.47    1.58   0
   4  -3 -10   17.85    1.81   0
   4  -3  11    2.98    1.66   0
   4  -2  11    6.02    2.13   0
   4   6 -10   32.21    1.56   0
   4   8  -9   25.17    1.64   0
   5 -11   3   98.57    2.60   0
   5 -10   6   74.44    2.07   0
   5  -3 -11   13.77    1.68   0
   0   1  -1 1179.04   10.50   0
   0   3  -1  443.71    4.98   0
   0   4   0  122.57    3.09   0
   0   4   1 1227.19   10.86   0
   1  -3  -4   64.29    2.87   0
   1  -3   5   86.91    1.67   0
   1   5  -5   67.75    1.50   0
   1   5   6   52.93    2.33   0
   1   8  -2   44.45    1.37   0
   2  -7   2   61.58    1.70   0
   2  -6   5  119.89    1.79   0
   2  -5   6   57.77    1.43   0
   2  -4   7  230.89    2.40   0
   2  -2   8  690.04    4.22   0
   2   0  -8   10.12    1.33   0
   2   1  -8   13.45    1.09   0
   2   2  -8    0.54    0.95   0
   2   3  -8  130.49    1.91   0
   2   4  -8  131.75    2.09   0
   2   8  -6  132.10    1.96   0
   2   9  -5   13.96    1.17   0
   2  11  -1   84.27    2.16   0
   2  11   0   55.34    1.73   0
   2  11   1   -0.04    1.10   0
   2  11   2   25.36    1.83   0
   3  -9   0   90.87    1.89   0
   3  -9   1  132.61    2.16   0
   3  -8   4  508.27    3.67   0
   3  -7   6  171.16    2.08   0
   3  -6   7  386.90    3.11   0
   3  -5   8  958.03    4.65   0
   3  -1  10   58.46    1.62   0
   3   4  10    1.64    1.77   0
   3   6  -9   31.17    1.32   0
   3   8  -8   13.15    1.35   0
   3  11  -5   13.72    1.42   0
   3  12  -3  249.07    2.81   0
   3  12   4    2.30    2.26   0
   4 -10  -2  179.57    2.91   0
   4 -10   2   63.47    1.87   0
   4  -9   5    3.19    1.25   0
   4  -7   8    9.15    1.40   0
   4  -4  10   14.89    1.53   0
   4  -1  11   10.54    1.97   0
   4   0 -11    0.06    1.28   0
   4   1 -11   75.08    1.80   0
   4   2 -11   17.62    1.45   0
   4   3 -11   10.07    1.53   0
   4   4 -11  224.59    2.88   0
   4   7 -10   43.64    1.76   0
   4   9  -9   16.18    1.80   0
   4  10  -8   24.97    1.79   0
   4  11  -7    0.20    1.71   0
   5 -11  -2   42.49    2.19   0
   5 -11   2   61.81    1.89   0
   5 -10  -5    1.34    2.01   0
   5 -10   5    7.53    1.61   0
   5  -9   7    0.02    1.67   0
   5  -8  -8  247.71    9.23   0
   5  -8   8   16.70    1.82   0
   5  -7  -9   44.61    3.12   0
   5   0 -12    0.24    1.75   0
   0   1   2   76.20    3.53   0
   0   4  -1 1210.50    7.50   0
   1  -4   3   82.35    1.70   0
   1  -2  -5  798.52    6.73   0
   1  -1   6  303.89    2.95   0
   1   0  -6   -0.14    1.00   0
   1   1  -6    4.93    0.83   0
   1   2  -6  447.44    3.53   0
   1   3  -6  114.27    1.83   0
   1   4  -6   57.29    1.58   0
   1   6  -5 1508.78    5.97   0
   1   7  -4  619.71    3.96   0
   1   8  -3   62.61    1.50   0
   1   9  -1    2.36    1.23   0
   1   9   0   43.96    1.76   0
   1   9   1  162.79    2.88   0
   2  -7   0  298.74    3.57   0
   2  -7   1  455.71    3.86   0
   2  -6   4 1369.78    5.79   0
   2  -3  -7  207.69    3.15   0
   2  -3   7   35.50    1.57   0
   2  -1  -8   14.66    1.39   0
   2  -1   8  232.44    2.71   0
   2   5  -8   10.42    1.01   0
   2   7  -7    2.36    0.99   0
   2  10  -4   45.63    1.46   0
   2  11  -2  286.51    2.98   0
   3  -3  -9    0.55    1.39   0
   3  -3   9    1.82    1.04   0
   3   0 -10   -0.90    1.48   0
   3   0  10   -0.52    1.15   0
   3   1 -10   45.23    1.42   0
   3   1  10   66.24    1.73   0
   3   2 -10  104.75    1.81   0
   3   2  10   24.08    1.72   0
   3   3 -10  106.21    1.82   0
   3   3  10   36.53    1.85   0
   3   4 -10    3.02    1.15   0
   3   7  -9    0.73    1.26   0
   3   7   9   70.23    2.62   0
   3   9  -8   13.06    1.76   0
   3  10  -7   26.59    1.51   0
   3  11  -6   29.33    2.09   0
   3  12  -4    8.99    1.56   0
   3  13  -1    9.68    2.23   0
   3  13   0   31.47    2.43   0
   3  13   1   -0.38    2.28   0
   4 -10   0    0.40    1.16   0
   4 -10   1   64.30    1.71   0
   4  -9   4    4.69    1.59   0
   4  -8   6    2.34    1.18   0
   4  -7   7   98.20    2.09   0
   4  -6   8  230.48    2.71   0
   4  -5   9  187.66    2.23   0
   4  -4 -10  169.53    3.04   0
   4  -3  10    3.32    1.40   0
   4  -1 -11   73.06    1.88   0
   4   0  11   -0.41    1.57   0
   4   1  11   10.62    2.01   0
   4   2  11    6.51    2.19   0
   4   3  11    4.26    2.20   0
   4   4  11    0.49    1.70   0
   4   5 -11  110.09    2.05   0
   4   6 -11   -1.41    2.12   0
   4   8 -10   45.93    1.93   0
   5 -11   0   -0.24    1.45   0
   5 -11   1    2.31    1.49   0
   5 -10   4   86.75    2.37   0
   5  -9   6    0.09    1.89   0
   5  -4 -11   25.36    1.90   0
   0   2  -2  212.17    3.45   0
   0   3  -2 1826.38    8.77   0
   0   5   0    0.04    1.17   0
   1  -3   4  469.76    3.75   0
   1  -2   5 1888.44    7.34   0
   1   0   6   -0.28    0.79   0
   1   5  -6 1272.11    5.41   0
   1   7  -5  264.44    2.81   0
   1   8  -4  182.36    2.47   0
   1   9  -2   36.37    1.60   0
   1   9   2  114.50    2.71   0
   2  -5   5   31.25    1.14   0
   2  -4   6  132.06    1.87   0
   2   0   8 1380.57    6.28   0
   2   5   8   28.53    1.73   0
   2   6  -8  324.54    2.77   0
   2   8  -7  190.84    2.19   0
   2   9  -6  253.42    2.49   0
   2  10  -5   69.87    1.61   0
   2  11  -3   10.02    1.30   0
   2  11   3   21.75    2.02   0
   3  -8   3  269.31    2.71   0
   3  -7   5    6.29    1.03   0
   3  -6   6    3.26    1.29   0
   3  -5   7  155.99    2.26   0
   3  -4   8   30.75    1.27   0
   3  -2   9    5.53    1.08   0
   3  -1 -10   45.06    1.89   0
   3   5 -10   16.93    1.36   0
   3   6 -10   -0.48    1.72   0
   3   8  -9    2.49    1.39   0
   3  12  -5   61.35    1.92   0
   3  13  -3    2.98    2.30   0
   3  13  -2  103.90    2.32   0
   3  13   2    1.25    2.30   0
   4  -4   9  155.63    2.43   0
   4  -2 -11   16.69    1.94   0
   4  -2  10  156.96    2.44   0
   5  -8   7   34.78    1.65   0
   5  -7   8   -1.39    1.58   0
   5  -6 -10   52.28    2.76   0
   5  -6   9   52.92    1.88   0
   5  -4  10    0.12    2.11   0
   0   1  -2   72.88    2.40   0
   0   2   2  217.82    7.93   0
   0   4  -2  155.66    2.54   0
   0   5  -1  394.12    4.08   0
   0   5   1  392.36    5.46   0
   1  -4   2  623.67    4.68   0
   1  -1  -6    3.80    1.14   0
   1  -1   5  222.31    2.79   0
   1   1   6  290.88    3.27   0
   1   2  -7   33.74    1.38   0
   1   2   6    3.01    1.18   0
   1   3  -7    4.31    1.17   0
   1   3   6    1.91    1.16   0
   1   4   6  609.21    5.88   0
   1   6  -6  265.60    2.58   0
   1   9  -3   56.03    1.44   0
   2  -6   3   95.96    1.80   0
   2  -2  -8    4.15    0.96   0
   2  -2   7  320.81    2.87   0
   2   1  -9   89.91    1.74   0
   2   1   8  220.87    2.71   0
   2   2  -9    6.61    0.97   0
   2   2   8  689.47    4.88   0
   2   3  -9  110.08    1.82   0
   2   3   8  231.85    3.07   0
   2   4  -9    0.04    0.98   0
   2   4   8  102.16    2.38   0
   2   5  -9   47.28    1.66   0
   2   7  -8   49.95    1.43   0
   2   7   7    3.67    1.73   0
   2   9  -7   14.22    1.54   0
   2  10  -6   55.14    1.86   0
   2  11  -4    0.60    1.22   0
   2  12  -1    0.23    1.77   0
   2  12   0    0.84    1.64   0
   3  -8  -3  120.69    2.91   0
   3  -8   2  335.56    3.09   0
   3  -7   4  846.75    4.60   0
   3  -6  -7   33.38    2.75   0
   3  -5  -8   37.13    1.99   0
   3  -3   8  296.89    2.83   0
   3  -1   9  167.78    2.18   0
   3   6   9  177.92    3.22   0
   3   7 -10   42.54    2.08   0
   3   9  -9  136.58    2.56   0
   3  10  -8   -1.35    1.58   0
   3  11  -7    0.27    1.58   0
   3  12  -6   14.51    2.37   0
   4  -9  -4   24.46    1.88   0
   4  -9   3   10.43    1.13   0
   4  -8   5   -0.08    1.06   0
   4  -7   6  156.57    2.23   0
   4  -5   8   61.01    1.79   0
   4  -1  10    0.02    1.61   0
   4   1 -12    0.14    2.12   0
   4   2 -12   34.03    1.79   0
   4   3 -12   -0.17    1.66   0
   4   4 -12  136.56    2.36   0
   5 -10  -4   47.89    2.42   0
   5 -10   3   44.40    1.64   0
   5  -9   5   26.21    1.54   0
   5  -5   9   38.78    2.11   0
   6 -11   1    0.08    2.26   0
   0   2  -3 1033.89    6.45   0
   0   3  -3  539.68    4.40   0
   0   4  -3   16.30    1.05   0
   0   4   2  147.52    5.92   0
   0   5  -2  624.67    4.64   0
   0   6  -1  142.39    2.49   0
   1  -4   1  261.52    3.39   0
   1  -3   3  878.38    5.36   0
   1  -2   4  121.12    2.25   0
   1   1  -7   73.87    1.61   0
   1   4  -7   47.43    1.34   0
   1   5  -7  134.93    1.90   0
   1   7  -6  602.63    3.72   0
   1   8  -5  529.65    3.55   0
   1   9  -4  165.56    2.14   0
   1  10  -1   26.46    1.57   0
   1  10   0  792.06    5.54   0
   2  -6   2  175.63    2.33   0
   2  -5   4   38.46    1.26   0
   2  -4   5   13.06    1.17   0
   2  -3   6  529.12    3.57   0
   2  -1   7    4.40    1.18   0
   2   0  -9    0.47    0.88   0
   2   6  -9  296.92    2.63   0
   2   8  -8    8.25    1.16   0
   2  11  -5   31.70    1.48   0
   2  12  -3  152.33    2.60   0
   2  12  -2   -0.05    1.26   0
   2  12   1   43.97    2.22   0
   3  -8  -2  146.84    2.82   0
   3  -8   0   34.83    1.62   0
   3  -8   1    2.94    0.94   0
   3  -6   5  719.18    4.13   0
   3  -4  -9   16.11    1.51   0
   3  -4   7  175.18    2.06   0
   3  -2 -10  103.58    2.07   0
   3   0   9  578.47    3.93   0
   3   1 -11   27.03    1.41   0
   3   1   9  176.14    2.56   0
   3   2 -11  142.06    2.12   0
   3   3 -11   94.25    1.86   0
   3   4 -11  360.51    3.01   0
   3   5 -11    0.49    1.96   0
   3   5   9   31.70    1.93   0
   3   8 -10   49.91    2.26   0
   3   8   8   12.79    2.34   0
   3  13   3    0.22    2.40   0
   4  -9   2  212.68    2.48   0
   4  -8   4   27.51    1.58   0
   4  -6   7    0.96    1.08   0
   4  -3 -11   11.88    1.53   0
   4  -3   9   -0.35    1.19   0
   4   0 -12   50.95    1.87   0
   4   0  10    2.26    1.31   0
   4   6  10   12.84    1.81   0
   5 -10   1   14.17    1.81   0
   5 -10   2   41.67    1.60   0
   5  -9   4   16.65    1.82   0
   5  -8   6   82.98    1.82   0
   5  -7   7    0.00    1.38   0
   5  -6   8   89.12    1.89   0
   5  -3  10    7.78    1.61   0
   6 -11  -2   -0.04    2.11   0
   6 -11  -1    6.86    2.21   0
   6 -11   0    3.96    1.76   0
   6 -10   4    2.76    1.77   0
   0   0  -2 2740.47   15.05   0
   0   1  -3 1404.26    8.10   0
   0   3  -4   98.43    2.00   0
   0   4  -4  271.36    2.95   0
   0   5  -3  310.93    3.09   0
   0   6  -2  235.28    2.83   0
   0   6   0  129.99    2.51   0
   1  -4  -2 2033.83   17.24   0
   1   0  -7  330.79    3.29   0
   1   6  -7   41.48    1.28   0
   1   8  -6  563.02    3.81   0
   1   8   4  177.42    6.15   0
   1   9  -5    6.60    1.43   0
   1   9   3  129.02    3.53   0
   1  10  -3   10.76    1.46   0
   1  10  -2    0.10    0.98   0
   1  10   1   36.95    1.88   0
   2  -6   1   37.90    1.60   0
   2  -4  -7   10.91    1.36   0
   2  -1  -9   92.74    1.87   0
   2   3 -10    6.15    1.54   0
   2   4 -10  129.83    2.11   0
   2   7  -9   23.64    1.37   0
   2   9  -8   94.21    1.82   0
   2  10  -7  216.66    2.43   0
   2  11  -6  119.06    2.36   0
   2  12  -4    3.42    1.38   0
   2  12   2   -0.16    1.82   0
   3  -7   3   57.90    1.51   0
   3  -5   6   40.99    1.28   0
   3  -2   8    4.58    1.03   0
   3   0 -11   38.21    1.56   0
   3   2   9    7.93    1.14   0
   3   3   9    1.67    1.50   0
   3   4   9   97.68    2.24   0
   3   6 -11  261.93    2.71   0
   3   7 -11    0.14    2.08   0
   4  -9  -3  119.26    2.73   0
   4  -9   0  138.94    2.46   0
   4  -9   1   49.52    1.49   0
   4  -7   5   74.54    1.87   0
   4  -6  -9    6.18    1.85   0
   4  -5 -10   42.03    2.21   0
   4  -4   8  269.45    2.55   0
   4  -2   9  129.10    1.99   0
   4  -1 -12   -4.60    1.69   0
   4   1  10    0.27    1.28   0
   4   2  10  169.44    2.65   0
   4   3  10    4.10    1.98   0
   4   4  10   17.38    1.92   0
   4   5  10    0.50    1.59   0
   5 -10  -3   90.66    2.51   0
   5 -10  -2  108.59    2.63   0
   5 -10  -1   44.58    2.08   0
   5 -10   0   31.42    1.85   0
   5  -8   5   32.66    1.88   0
   5  -4   9   46.69    1.69   0
   5  -2  10   33.91    1.72   0
   6 -10   3   98.63    2.15   0
   6  -9   5   25.13    1.83   0
   0   2  -4  145.83    2.36   0
   0   5  -4  143.53    2.09   0
   0   6  -3  296.48    2.99   0
   0   6   1  140.35    3.07   0
   0   7  -2  279.96    3.08   0
   0   7  -1  140.17    2.48   0
   1  -4  -1 1981.75   12.51   0
   1  -2  -6  451.98    4.72   0
   1   2  -8  191.71    2.28   0
   1   3  -8   58.91    1.47   0
   1   4  -8  338.46    2.83   0
   1   5  -8   -0.27    1.26   0
   1   6   5  130.77    4.66   0
   1   7  -7   67.86    1.53   0
   1  10  -4  184.80    2.30   0
   2  -6  -3    1.84    1.05   0
   2  -6   0 1672.68    8.05   0
   2  -5   3 1564.24    6.55   0
   2  -3  -8  129.33    2.44   0
   2  -2   6    0.07    0.80   0
   2   0   7    0.17    0.77   0
   2   1 -10   -0.27    1.06   0
   2   2 -10  578.03    3.81   0
   2   5 -10   52.79    1.47   0
   2   6 -10   71.64    2.08   0
   2   8  -9  173.66    2.23   0
   2  11   4  118.88    3.93   0
   2  12  -5   13.89    1.54   0
   2  13  -2   14.02    1.92   0
   2  13  -1   18.61    1.99   0
   3  -7   2   86.81    1.92   0
   3  -6   4  240.20    2.72   0
   3  -3 -10  104.79    2.44   0
   3  -3   7  203.01    2.25   0
   3  -1 -11   31.31    1.46   0
   3  -1   8   47.79    1.39   0
   3   3 -12   48.90    2.12   0
   3  12   5    6.27    2.80   0
   4  -9  -2   70.05    1.89   0
   4  -8  -6  210.36    5.99   0
   4  -8   3   47.32    1.37   0
   4  -6   6   41.60    1.37   0
   4  -5   7  449.49    3.13   0
   4  -2 -12   28.31    2.33   0
   4  -1   9   83.94    2.06   0
   4   8   9   17.00    2.30   0
   5  -9   3  209.44    2.46   0
   5  -7   6    1.96    1.33   0
   5  -6   7    8.83    1.32   0
   5  -5   8   13.15    1.39   0
   5  -3   9   62.41    2.10   0
   5  -1  10    0.72    1.50   0
   6 -10   2   22.64    1.73   0
   6  -9   4   60.32    2.37   0
   6  -8   6   83.04    1.99   0
   6  -7   7   63.04    1.91   0
   6  -6   8    1.01    1.71   0
   0   0  -3   -0.95    1.56   0
   0   1  -4  133.39    2.43   0
   0   2  -5  285.55    3.13   0
   0   3  -5 1968.55    7.39   0
   0   4  -5 1513.82    6.33   0
   0   5  -5  754.78    4.44   0
   0   5   2  649.58    9.08   0
   0   6  -4 1059.58    5.24   0
   0   7  -3  152.03    2.14   0
   0   7   0    0.20    0.85   0
   1  -3  -5    2.63    1.08   0
   1  -3   2 2240.02    9.20   0
   1  -2   3 2434.41    9.36   0
   1  -1  -7   76.72    1.82   0
   1  -1   4 4862.43   12.97   0
   1   1  -8  485.70    3.65   0
   1   1   5  217.14    3.02   0
   1   6  -8  142.26    1.95   0
   1   7  -8   -1.53    1.36   0
   1   8  -7  218.39    2.30   0
   1   9  -6  105.45    1.79   0
   1  10  -5  177.43    2.28   0
   1  10   2  418.40    4.99   0
   1  11  -3    9.93    1.62   0
   1  11  -2   50.25    1.58   0
   1  11  -1    2.51    1.07   0
   1  11   0   26.16    1.64   0
   2  -6  -2  645.60    6.33   0
   2  -4   4  943.19    4.99   0
   2  -3   5   23.98    1.07   0
   2  -2  -9    5.56    1.32   0
   2   0 -10  445.37    3.51   0
   2   6   7  299.75    4.42   0
   2   7 -10    2.53    1.37   0
   2   9  -9    1.64    1.46   0
   2  10  -8    0.02    1.39   0
   2  11  -7   83.87    1.97   0
   2  12  -6    1.25    1.58   0
   2  13  -4   12.46    2.28   0
   2  13  -3    7.42    1.67   0
   2  13   0   13.10    1.61   0
   3  -5   5   99.85    1.74   0
   3  -4   6    7.29    0.95   0
   3   0   8   -0.06    1.36   0
   3   1 -12   -0.13    1.94   0
   3   2 -12   36.95    1.71   0
   3   4 -12   15.30    1.63   0
   3   5 -12    0.29    1.67   0
   3   7   8  342.90    4.66   0
   4  -8   2    0.13    1.35   0
   4  -7   4  206.97    2.47   0
   4  -4 -11  218.00    3.59   0
   4  -3   8   78.68    1.62   0
   4   0   9    1.01    1.57   0
   5  -9  -6   34.07    2.60   0
   5  -9   2  109.43    1.90   0
   5  -8   4  104.92    2.03   0
   5  -4   8   12.50    1.80   0
   5   0  10   -0.68    1.50   0
   5   1  10    0.68    2.05   0
   6 -10   1  145.01    2.59   0
   6  -8   5    0.04    1.98   0
   6  -5   8   -0.42    2.09   0
   6  -4   9   79.39    2.04   0
   0   6  -5  114.82    1.83   0
   0   7  -4  104.52    1.77   0
   0   7   1  138.45    2.90   0
   0   8  -3  738.62    4.59   0
   0   8  -2  242.17    2.72   0
   0   8  -1   58.79    1.79   0
   1   0  -8   -0.36    0.79   0
   1   2   5 1964.94    9.47   0
   1   3  -9  354.80    3.13   0
   1   4  -9  279.61    2.54   0
   1   5  -9  102.88    2.02   0
   1   8  -8   39.92    1.75   0
   1   9  -7  229.23    2.38   0
   1  10  -6  222.15    2.35   0
   1  11  -4    4.96    1.17   0
   2  -5  -6   13.94    2.07   0
   2  -5   2  794.71    4.92   0
   2  -1 -10    2.94    1.35   0
   2  -1   6   33.50    1.28   0
   2   2 -11   26.90    1.75   0
   2   2   7  307.81    3.23   0
   2   3 -11  285.23    2.73   0
   2   3   7   36.41    1.74   0
   2   4 -11  100.43    1.87   0
   2   4   7  245.31    3.42   0
   2   5 -11   13.77    1.40   0
   2   5   7   17.06    1.57   0
   2   8 -10   17.65    1.51   0
   2  10  -9    7.00    1.69   0
   2  11  -8    0.13    1.66   0
   2  12   3   31.24    2.37   0
   2  13  -5   11.65    1.87   0
   2  13   1    0.89    2.06   0
   3  -7  -5  136.17    4.51   0
   3  -7   1  213.45    2.60   0
   3  -6   3 1213.11    5.64   0
   3  -2 -11  133.36    2.39   0
   3  -2   7    0.91    0.88   0
   3   0 -12    0.11    1.94   0
   3   1   8   47.90    1.72   0
   4  -6   5  115.55    1.83   0
   4  -5   6    9.53    1.04   0
   4  -4   7   57.91    1.45   0
   4  -3 -12   -0.12    2.07   0
   4  -2   8   83.47    1.84   0
   4   1   9   84.81    2.11   0
   4   7   9   40.67    2.01   0
   5  -9   1   25.42    1.75   0
   5  -8  -8  230.16   10.02   0
   5  -7   5    1.39    1.13   0
   5  -6   6   27.81    1.71   0
   5  -5   7    0.67    1.21   0
   5  -2   9    0.95    1.33   0
   5   2  10   27.19    1.76   0
   5   3  10    9.27    2.16   0
   5   4  10    0.71    2.30   0
   6 -10  -5   36.80    2.23   0
   6 -10   0   14.07    1.60   0
   6  -9   3   76.48    1.89   0
   6  -7   6   38.34    1.65   0
   6  -6   7   -0.36    1.44   0
   6  -3   9    2.88    1.62   0
   0   0  -4 1661.51    8.60   0
   0   1  -5 2418.55    9.04   0
   0   2  -6   15.28    1.29   0
   0   3  -6  515.67    3.70   0
   0   4  -6    8.90    1.02   0
   0   5  -6  664.41    3.97   0
   0   6  -6  229.76    2.66   0
   0   7  -5  130.66    1.94   0
   0   8  -4   54.72    1.55   0
   0   8   0   -0.25    0.79   0
   1  -3   1  785.32    6.25   0
   1   1  -9  245.27    2.82   0
   1   2  -9   66.05    1.54   0
   1   3   5   85.57    2.40   0
   1   5   5  134.53    3.78   0
   1   6  -9    3.11    1.15   0
   1   7  -9   12.77    1.65   0
   1   9  -8   78.69    2.01   0
   1  10  -7    3.44    1.77   0
   1  11  -5   14.49    1.35   0
   1  11   1  334.15    3.83   0
   1  12  -2   12.99    1.70   0
   2  -4   3 1577.98    6.72   0
   2  -2   5  161.45    2.15   0
   2   1 -11  567.14    3.87   0
   2   6 -11   22.05    1.55   0
   2   7 -11   14.17    1.58   0
   2   9 -10    8.58    1.79   0
   3  -7   0  114.26    2.21   0
   3  -5   4 1021.33    5.04   0
   3  -4   5    1.36    1.20   0
   3  -3   6  221.87    2.37   0
   3  -1 -12    0.49    1.78   0
   3  -1   7   47.44    1.61   0
   3   2   8    2.78    1.33   0
   3   6   8   32.32    1.93   0
   4  -8   1  159.89    2.21   0
   4  -7   3    2.61    0.89   0
   4  -3   7  211.56    2.43   0
   4   2   9  132.39    2.13   0
   4   3   9   -1.49    1.66   0
   4   6   9   95.95    2.55   0
   5  -9   0   10.05    1.63   0
   5  -8   3   19.41    1.25   0
   5  -3   8   79.60    1.70   0
   5  -1   9    8.39    1.36   0
   6 -10  -4   -0.03    1.66   0
   6 -10  -3   76.05    2.65   0
   6 -10  -1   12.56    1.58   0
   6  -9   2   11.03    1.92   0
   6  -8   4   11.57    1.75   0
   6  -4   8    0.96    1.83   0
   6  -2   9    0.24    2.08   0
   0   4  -7  198.10    2.39   0
   0   5  -7   37.70    1.57   0
   0   6   2  235.94    4.83   0
   0   7  -6    1.54    0.92   0
   0   8  -5  308.02    2.75   0
   0   9  -4  238.92    2.74   0
   0   9  -3   27.06    1.24   0
   0   9  -2    9.76    0.99   0
   0   9  -1    5.61    1.35   0
   1  -2  -7   30.98    1.33   0
   1  -1  -8  485.89    4.01   0
   1   0   4    0.57    0.84   0
   1   4 -10   45.36    1.70   0
   1   4   5  107.01    2.88   0
   1   5 -10  322.35    3.02   0
   1   8  -9   73.53    1.65   0
   1  11  -6   17.09    1.45   0
   1  12  -5   56.47    2.10   0
   1  12  -4   22.47    1.54   0
   1  12  -3    0.31    1.27   0
   1  12  -1    9.30    1.34   0
   2  -5   1  345.36    3.46   0
   2  -3  -9  108.30    2.47   0
   2  -3   4  142.44    2.10   0
   2   0 -11   -0.90    1.55   0
   2   0   6   17.17    1.03   0
   2   4 -12   -1.22    1.91   0
   2   5 -12    0.48    1.91   0
   2   8   6    0.67    1.78   0
   2  13   2   -0.63    2.10   0
   2  14   0   18.21    2.37   0
   3  -6   2  521.49    3.86   0
   3  -5  -9    2.41    1.50   0
   3  -4 -10    3.12    1.20   0
   3  -3 -11   96.39    2.54   0
   3   3   8  298.57    3.15   0
   3   4   8   34.07    1.72   0
   3   5   8  982.74    6.17   0
   3   9   7    7.14    1.98   0
   4  -8   0   45.61    1.49   0
   4  -6   4    1.24    0.87   0
   4  -4   6    0.99    1.29   0
   4  -1   8   83.21    1.71   0
   4   4   9  157.65    2.50   0
   4   5   9  190.37    2.81   0
   4   9   8   15.43    2.56   0
   5  -9  -5   14.68    1.97   0
   5  -9  -1  193.82    2.87   0
   5  -7   4   12.09    1.20   0
   5  -4   7  264.91    2.51   0
   5   0   9    8.85    1.32   0
   6  -7   5  139.46    2.04   0
   6  -6   6  196.00    2.26   0
   6  -5   7   43.25    1.64   0
   0   0  -5    0.97    0.84   0
   0   1  -6  466.54    3.78   0
   0   2  -7   40.44    1.52   0
   0   3  -7   38.22    1.28   0
   0   6  -7  211.57    2.29   0
   0   7  -7    4.83    1.41   0
   0   8  -6  108.20    1.78   0
   0   8   1   60.36    2.04   0
   0   9  -5  194.21    2.22   0
   0   9   0    0.05    1.33   0
   1  -3  -6  119.31    2.92   0
   1  -2   2 1544.33    8.18   0
   1  -1   3  212.77    3.05   0
   1   0  -9  153.56    2.23   0
   1   2 -10   46.84    1.42   0
   1   3 -10  252.78    2.53   0
   1   6 -10   99.23    1.85   0
   1   7 -10  138.77    1.99   0
   1   9  -9   -0.47    1.42   0
   1  10  -8    7.72    1.41   0
   1  10   3   35.26    2.14   0
   1  11  -7  124.50    2.11   0
   1  11   2  119.87    2.92   0
   1  12  -6   19.25    2.22   0
   1  12   0  209.75    2.99   0
   2  -4  -8  124.84    2.91   0
   2  -2 -10  558.46    4.47   0
   2   1   6   33.04    1.53   0
   2   2 -12   13.37    1.97   0
   2   3 -12  146.93    2.21   0
   2   6 -12   -0.03    1.69   0
   3  -7  -4  229.51    4.36   0
   3  -7  -2   10.58    1.30   0
   3  -2 -12   39.65    2.07   0
   3  -2   6   38.56    1.25   0
   3   0 -13   85.99    2.56   0
   3   0   7  222.15    2.52   0
   4  -8  -5  261.46    4.65   0
   4  -8  -1  426.70    3.96   0
   4  -7   2  153.28    2.16   0
   4  -5 -11   91.35    2.95   0
   4  -5   5   63.41    1.40   0
   4  -2   7    6.82    1.39   0
   4   0   8  889.91    4.64   0
   5  -9  -4  171.58    3.25   0
   5  -9  -3   25.48    1.86   0
   5  -8   2   -0.40    1.09   0
   5  -6   5  132.61    1.90   0
   5  -5   6    9.75    1.16   0
   5  -2   8   65.96    1.54   0
   5   1   9    6.74    1.36   0
   6  -9   1  177.56    2.39   0
   6  -8   3  236.71    2.58   0
   6  -3   8   -0.59    1.44   0
   6  -1   9   -0.08    1.47   0
   7  -9   2   53.15    1.99   0
   7  -8   4    4.45    1.73   0
   7  -7   5   66.99    2.25   0
   7  -6   6    0.30    2.14   0
   7  -5   7    0.45    1.69   0
   0  -1  -3 1406.21   10.42   0
   0   0  -6   44.19    1.58   0
   0   1  -7  393.75    3.54   0
   0   3  -8    9.18    1.28   0
   0   4  -8   79.19    1.57   0
   0   5  -8   31.98    1.17   0
   0   6  -8  218.32    2.30   0
   0   8  -7   -0.04    1.08   0
   0   9  -6   20.12    1.17   0
   0  10  -5   32.77    1.70   0
   0  10  -4   90.69    1.78   0
   0  10  -3  604.02    4.00   0
   0  10  -2    8.46    1.12   0
   0  10  -1  126.48    2.45   0
   1   1 -10  346.75    3.09   0
   1   1   4 5148.43   15.21   0
   1   5 -11    0.28    1.65   0
   1   8 -10    2.28    1.46   0
   1  10  -9   10.36    1.56   0
   1  11  -8    1.73    1.62   0
   1  12  -7   31.97    2.45   0
   1  12   1  115.06    2.79   0
   1  13  -5    1.98    2.16   0
   1  13  -4   12.16    1.70   0
   1  13  -3   82.18    2.06   0
   1  13  -2    1.80    1.49   0
   1  13  -1   34.41    2.08   0
   2  -5   0  429.49    4.27   0
   2  -4   2  264.77    2.95   0
   2  -1 -11  567.65    4.31   0
   2  -1   5   17.13    1.03   0
   2   1 -12   12.86    1.48   0
   3  -7  -3  179.98    3.34   0
   3  -6   1  171.41    2.53   0
   3  -5   3   10.95    0.99   0
   3  -4   4   72.35    1.71   0
   3  -3   5  362.40    3.00   0
   3   1   7   48.04    1.72   0
   4  -8  -4    0.19    1.34   0
   4  -8  -3    8.23    1.47   0
   4  -6   3   25.04    1.42   0
   4  -3   6   94.48    1.82   0
   4   1   8   87.30    1.73   0
   5  -8   1  132.64    2.21   0
   5  -7   3  441.06    3.25   0
   5  -3   7    0.42    1.09   0
   5  -1   8  646.64    3.86   0
   5   2   9    1.52    1.31   0
   5   3   9   65.26    2.22   0
   6  -9   0  165.52    2.37   0
   6  -7   4   13.65    1.34   0
   6  -6   5   80.12    2.06   0
   6  -5   6  188.91    2.49   0
   6  -4   7   94.66    1.78   0
   6  -2   8    0.63    1.81   0
   6   0   9   -0.14    1.56   0
   7  -9   1  161.24    2.87   0
   7  -8   3    0.37    2.19   0
   0  -1  -4  134.56    2.96   0
   0   2  -8  287.76    2.74   0
   0   7  -8  595.84    3.66   0
   0   7   2  269.69    4.73   0
   0   8  -8   92.52    2.06   0
   0   9  -7   22.63    1.31   0
   0   9   1    5.37    1.34   0
   0  10  -6   89.11    1.76   0
   0  10   0   80.69    2.10   0
   0  11  -4  168.06    2.45   0
   0  11  -3   55.30    1.95   0
   1  -2  -8  192.32    2.82   0
   1  -1  -9  237.50    2.82   0
   1   0 -10    0.69    1.32   0
   1   2 -11  168.88    2.41   0
   1   3 -11   -0.28    1.20   0
   1   4 -11   86.72    1.79   0
   1   6 -11   31.06    1.61   0
   1   7 -11  115.18    2.09   0
   1   8 -11   14.32    2.14   0
   1   9 -10   32.82    1.77   0
   2  -3   3    5.04    0.83   0
   2  -2   4 2348.01    8.18   0
   2   0 -12    0.18    1.79   0
   2   2   6    0.23    0.83   0
   3  -1   6  639.58    4.03   0
   3   8   7  188.93    3.76   0
   4  -7   1  719.90    4.48   0
   4  -6 -10   33.47    2.96   0
   4  -5   4  422.49    3.17   0
   4  -4   5   91.12    1.64   0
   4  -1   7  459.22    3.29   0
   4   2   8   78.31    1.87   0
   4   8   8  154.43    3.02   0
   5  -6   4   24.52    1.18   0
   5  -5   5   19.79    1.12   0
   5  -4   6  336.32    2.80   0
   5   0   8    1.54    1.56   0
   5   4   9   47.93    1.81   0
   5   5   9   41.65    1.87   0
   5   6   9   57.81    2.06   0
   6  -9  -1   11.47    1.84   0
   6  -8   2  279.27    2.79   0
   6   1   9    0.68    1.52   0
   7  -7   4   16.42    1.95   0
   7  -5   6  358.92    3.32   0
   7  -4   7  145.51    2.18   0
   7  -2   8    0.11    2.31   0
   0  -1  -5 2443.80   10.41   0
   0  -1  -2   74.16    3.51   0
   0   0  -7    0.33    1.09   0
   0   1  -8    0.72    1.18   0
   0   1   1 1292.35   24.59   0
   0   3  -9  361.76    2.89   0
   0   4  -9    1.55    1.03   0
   0   5  -9  274.70    2.61   0
   0   6  -9   12.34    1.21   0
   0   7  -9  191.14    2.20   0
   0   9  -8  306.27    2.80   0
   0  10  -7    1.58    1.33   0
   0  11  -6    3.35    1.79   0
   0  11  -5    0.05    1.25   0
   0  11  -2   49.60    1.56   0
   0  11  -1  105.77    2.31   0
   1  -3  -7    3.59    1.18   0
   1   1 -11   68.06    1.96   0
   1  13   0    9.36    1.58   0
   2  -3 -10    7.05    1.57   0
   2  -2 -11   27.82    1.89   0
   2   0   5    0.73    0.78   0
   2   2 -13    1.32    1.70   0
   2   3   6  538.30    4.54   0
   2   7   6   38.63    2.15   0
   2  13   3    0.76    2.53   0
   3  -5   2  280.41    2.98   0
   3  -4 -11  344.51    4.43   0
   3  -3 -12   44.75    2.32   0
   3  -2   5  465.08    3.53   0
   3   2   7    0.12    0.96   0
   4   3   8   78.94    1.80   0
   4   4   8  274.91    3.22   0
   4   7   8   10.26    1.78   0
   5  -8   0  147.23    2.19   0
   5  -7   2  122.32    1.93   0
   5  -2   7  579.64    3.59   0
   6  -9  -6    0.08    2.21   0
   6  -9  -2   -0.12    1.68   0
   6  -8   1    9.84    1.67   0
   6  -7   3  384.28    3.07   0
   6  -4   6  259.27    2.73   0
   6  -3   7  286.27    2.70   0
   6  -1   8    3.60    1.34   0
   6   2   9    0.48    1.60   0
   6   3   9    1.43    1.97   0
   7  -9   0    5.25    1.64   0
   7  -8   2    0.64    1.82   0
   7  -6   5   71.27    1.84   0
  -1   4  -5  105.94    1.96   0
  -1   4  -4  319.05    3.01   0
  -1   4  -3   83.34    1.76   0
  -1   5  -5  139.80    2.16   0
  -1   5  -4   14.58    0.95   0
  -1   5  -3  624.38    4.30   0
  -1   5  -2   10.36    1.28   0
  -1   6  -5  132.64    2.09   0
  -1   6  -4   62.22    1.44   0
  -1   6  -3   11.57    1.09   0
  -1   6  -2    2.63    1.24   0
  -1   7  -4   95.16    1.84   0
  -1   7  -3  105.13    1.98   0
   0   2  -9   -0.20    0.88   0
   0   4 -10  682.28    4.16   0
   0   5 -10   51.68    1.85   0
   0   6 -10  294.64    3.00   0
   0   8  -9   21.54    1.42   0
   0   8   2  240.40    4.23   0
   0   9  -9  331.97    3.22   0
   0  10  -8    0.37    1.38   0
   0  11  -7    1.52    1.48   0
   0  12  -5   -0.37    1.97   0
   0  12  -4   89.73    2.30   0
   0  12  -3  112.80    2.41   0
   1  -2  -9   69.80    1.91   0
   1  -1 -10  352.70    3.55   0
   1   0   3 1013.26    6.90   0
   1   2   4  122.51    2.86   0
   1   3 -12    1.00    1.39   0
   1   4 -12    7.55    1.50   0
   1   5 -12    4.52    1.58   0
   1   6 -12   -0.16    1.66   0
   1  12   2    0.17    1.63   0
   1  14  -2   44.58    2.07   0
   1  14  -1    0.03    2.19   0
   2  -5  -7   17.84    1.96   0
   2  -4  -9    0.29    1.34   0
   2  -4   1    3.96    1.14   0
   2  -1 -12   11.75    1.48   0
   2   1 -13   -0.11    1.69   0
   2   4   6  127.11    2.46   0
   2   5   6   57.93    2.15   0
   2   6   6    7.05    1.43   0
   3  -6  -8   62.45    3.83   0
   3  -6   0   99.40    1.95   0
   3  -4   3  495.91    3.68   0
   3  -3   4  245.61    2.66   0
   3   0   6    0.56    0.75   0
   3   3   7  207.09    2.65   0
   3   4   7  173.23    2.74   0
   3   7   7  169.70    3.23   0
   4  -7   0  191.98    2.52   0
   4  -6   2   30.32    1.22   0
   4  -2   6  123.91    1.85   0
   4   0   7    0.76    0.94   0
   4   5   8   59.51    1.78   0
   4   6   8  235.45    3.09   0
   5  -8  -1  396.42    3.75   0
   5  -6   3   23.61    1.41   0
   5  -3   6   67.10    1.51   0
   5  -1   7  174.50    2.39   0
   5   1   8  640.21    3.98   0
   6  -9  -5    0.06    2.00   0
   6  -9  -4  243.84    3.63   0
   6  -6   4   30.13    1.36   0
   6  -5   5    1.53    1.14   0
   6  -2   7   48.03    1.96   0
   6   0   8   17.64    1.43   0
   6   4   9   77.46    2.11   0
   7  -9  -1    0.34    1.64   0
   7  -7   3   43.89    1.99   0
   7  -4   6   35.03    2.08   0
   7  -3   7   17.89    1.64   0
   7  -1   8  142.43    2.29   0
  -1   3  -5   90.14    1.85   0
  -1   3  -4  459.32    3.74   0
  -1   3  -3  881.84    5.36   0
  -1   4  -6  640.55    4.00   0
  -1   4  -2  599.48    4.67   0
  -1   5  -6   50.69    1.35   0
  -1   6  -6   87.74    1.70   0
  -1   7  -6  114.22    1.73   0
  -1   7  -5  480.62    3.44   0
  -1   7  -2    4.84    0.92   0
  -1   8  -5   82.30    1.80   0
  -1   8  -4  187.65    2.27   0
  -1   8  -3  120.32    1.96   0
   0  -1  -6  449.74    4.22   0
   0   0  -8    8.55    1.24   0
   0   1  -9   33.42    1.53   0
   0   3 -10    6.20    1.06   0
   0   7 -10   43.05    1.62   0
   0   8 -10  151.56    2.16   0
   0  10  -9   -0.08    1.58   0
   0  10   1  121.09    2.71   0
   0  11  -8   65.15    1.94   0
   0  11   0   -0.02    1.05   0
   0  12  -7    4.72    2.15   0
   0  12  -6    0.26    1.58   0
   0  12  -2  171.64    2.49   0
   1  -2   1   29.47    1.69   0
   1  -1   2  485.06    5.16   0
   1   0 -11   91.43    1.92   0
   1   2 -12    7.83    1.41   0
   1  13   1  114.16    2.97   0
   2  -1   4  338.48    3.30   0
   2   0 -13   -0.36    2.22   0
   2   1   5   18.32    1.29   0
   2  12   4   10.70    2.96   0
   3  -5 -10   16.96    2.02   0
   3   5   7  157.26    2.61   0
   3   6   7  367.64    4.07   0
   4  -7  -1   30.25    1.61   0
   4  -5   3  298.81    2.77   0
   4  -4   4   13.09    0.92   0
   4  -3   5   69.58    1.53   0
   4   1   7  475.90    3.66   0
   4  10   7   79.28    3.20   0
   5  -7   1   60.77    1.56   0
   5  -5   4   52.15    1.36   0
   5  -4   5   47.39    1.36   0
   5   2   8   68.60    1.64   0
   6  -8   0  286.78    2.88   0
   6  -7   2    1.06    1.12   0
   6   1   8    3.54    1.83   0
   7  -9  -2    6.47    1.68   0
   7  -8   1   64.26    1.85   0
   7  -6   4    3.04    1.35   0
   7  -5   5   12.29    1.47   0
   7  -2   7    0.96    1.97   0
   7   0   8    0.00    1.64   0
   8  -6   4   77.39    2.59   0
  -1   2  -4  122.51    2.31   0
  -1   3  -6   -0.34    0.77   0
  -1   3  -2 2331.01    9.50   0
  -1   4  -7  297.86    2.66   0
  -1   5  -7   33.89    1.22   0
  -1   5  -1  710.55    5.27   0
  -1   6  -7  270.17    2.53   0
  -1   6  -1   23.95    1.25   0
  -1   7  -7   69.17    1.51   0
  -1   7  -1  841.69    5.45   0
  -1   8  -7    0.40    1.41   0
  -1   8  -6  137.79    1.94   0
  -1   8  -2   56.51    1.51   0
  -1   9  -6   67.02    1.90   0
  -1   9  -5  407.79    3.13   0
  -1   9  -4   58.28    1.48   0
  -1   9  -3  123.83    1.94   0
   0  -1  -7  373.46    3.78   0
   0   2 -10  105.26    1.82   0
   0   4 -11   -0.04    1.73   0
   0   5 -11   64.64    1.73   0
   0   6 -11   25.23    1.53   0
   0   7 -11   88.85    1.99   0
   0   8 -11   27.34    2.21   0
   0   9 -10   -0.12    1.64   0
   0  12  -1    4.09    1.27   0
   0  13  -5    0.06    1.71   0
   0  13  -4  212.77    2.72   0
   0  13  -3   37.13    2.18   0
   1  -3  -8   65.70    2.14   0
   1   1 -12   -0.10    1.35   0
   1   3 -13    3.02    2.09   0
   1  11   3    2.90    1.68   0
   1  14   0    0.04    2.38   0
   2  -5  -2    0.14    1.02   0
   2  -3 -11  287.09    3.65   0
   2  -3   2  167.38    2.46   0
   2  -2 -12   15.00    2.03   0
   2  -2   3  381.84    3.53   0
   3  -5   1   91.03    1.82   0
   3  -1   5   67.40    1.48   0
   3   1   6  633.62    4.26   0
   4  -6   1  200.90    2.42   0
   4  -1   6  579.11    3.75   0
   4   2   7    6.98    1.36   0
   5  -8  -7  185.83    4.40   0
   5  -2   6   84.49    1.68   0
   5   0   7  837.59    4.39   0
   5   3   8   78.58    1.80   0
   5   4   8   10.44    1.81   0
   5   7   8   -0.40    2.09   0
   5   8   8   20.63    1.90   0
   6  -6   3   26.42    1.29   0
   6  -5   4    1.30    1.49   0
   6  -4   5  309.68    2.80   0
   6  -3   6  267.96    2.50   0
   6  -1   7  255.89    2.47   0
   6   2   8   -0.25    1.84   0
   7  -9  -3   17.52    1.77   0
   7  -8   0  214.08    2.92   0
   7  -7   2    4.85    1.75   0
   7  -3   6  285.32    2.86   0
   7   1   8  152.57    2.59   0
  -1   2  -6    4.30    0.80   0
  -1   2  -5 1867.79    7.33   0
  -1   2  -3 2358.17    9.24   0
  -1   3  -7    6.43    0.95   0
  -1   4  -8    0.10    1.28   0
  -1   4  -1  276.56    3.55   0
  -1   5  -8    9.86    1.01   0
  -1   6  -8   17.86    1.11   0
  -1   7  -8   12.61    1.16   0
  -1   8  -8  294.95    2.84   0
  -1   8  -1   22.69    1.18   0
  -1   9  -7   11.43    1.28   0
  -1   9  -2  116.64    1.98   0
  -1  10  -6   66.76    1.96   0
  -1  10  -5   55.77    1.54   0
  -1  10  -4    1.87    1.01   0
  -1  10  -3   32.34    1.59   0
   0   0  -9    0.65    0.94   0
   0   1 -10    3.43    1.04   0
   0   3 -11    0.11    1.22   0
   0   9   2    7.01    1.43   0
   0  12   0  361.49    4.01   0
   0  13  -2    7.62    1.57   0
   1  -2 -10   46.25    1.80   0
   1  -1 -11   70.90    1.77   0
   1   0 -12   -0.08    1.64   0
   1   2 -13   -0.06    2.28   0
   1   3   4  473.66    5.59   0
   2  -1 -13    0.24    1.71   0
   2   2   5  165.92    2.70   0
   3  -4 -12   14.91    2.14   0
   3  -4   2   40.49    1.49   0
   3  -2   4  305.22    2.99   0
   3  10   6   16.80    2.45   0
   4  -5   2  279.99    2.84   0
   4  -2   5   80.91    1.58   0
   4   9   7   51.34    2.50   0
   5  -8  -4  145.04    2.81   0
   5  -7   0   55.57    1.52   0
   5  -6   2   74.39    1.53   0
   5  -5   3   23.92    1.39   0
   5  -4   4  130.14    2.05   0
   5  -3   5  151.09    1.93   0
   5   5   8   12.80    1.44   0
   5   6   8   90.37    2.08   0
   6  -8  -1    0.65    1.17   0
   6  -7   1  517.79    3.58   0
   6  -2   6  234.13    2.61   0
   6   3   8   -0.57    1.76   0
   7  -6   3    4.79    1.27   0
   7  -5   4    0.48    1.71   0
   7  -4   5   94.66    1.79   0
   7  -1   7   21.05    1.54   0
   7   2   8    0.46    2.07   0
   8  -8   0   12.62    1.86   0
   8  -7   2   35.50    1.88   0
   8  -6   3    0.08    2.11   0
   8  -4   5   -0.51    2.20   0
   8  -3   6   29.57    1.85   0
  -1   2  -7    8.14    0.98   0
  -1   3  -8  370.66    2.98   0
  -1   4  -9  398.72    3.20   0
  -1   5  -9   65.54    1.52   0
  -1   6  -9  171.83    2.09   0
  -1   7  -9   11.70    1.29   0
  -1   8  -9   66.71    2.02   0
  -1   9  -8   -0.16    1.31   0
  -1   9  -1  164.22    2.57   0
  -1  10  -7    2.12    1.28   0
  -1  10  -2  422.68    3.50   0
  -1  11  -6   78.62    2.19   0
  -1  11  -5  103.78    2.28   0
  -1  11  -4  133.64    2.28   0
   0  -1  -8    0.35    0.82   0
   0   2 -11    2.50    1.09   0
   0   4 -12    6.21    2.09   0
   0   5 -12    0.25    1.55   0
   0   6 -12    0.00    1.64   0
   0  11   1  102.90    2.36   0
   0  13  -1  208.11    3.27   0
   1   1 -13    2.53    2.16   0
   2  -4 -10  122.64    2.89   0
   2  -4   0  409.74    4.22   0
   2   0   4  386.62    3.61   0
   3  -3   3  793.73    4.65   0
   3   0   5  314.83    3.08   0
   3   2   6   35.29    1.27   0
   4  -6   0  454.45    3.83   0
   4  -4   3   50.47    1.35   0
   4  -3   4  595.02    3.74   0
   4   0   6   14.51    1.09   0
   4   3   7  202.88    2.50   0
   5  -8  -6   -0.03    1.62   0
   5  -8  -5  108.04    2.71   0
   5  -1   6  778.76    4.25   0
   5   1   7  165.49    2.22   0
   6  -8  -2  125.19    2.35   0
   6  -6   2  889.75    4.72   0
   6  -3   5   -0.39    1.42   0
   6   0   7   -0.85    1.21   0
   6   4   8    1.17    1.50   0
   6   5   8   -0.44    2.10   0
   6   6   8   -0.83    2.25   0
   7  -8  -1    3.54    1.48   0
   7  -7   1   13.53    1.72   0
   7  -2   6    0.86    1.62   0
   7   0   7   58.48    2.20   0
   7   3   8    1.86    1.73   0
   8  -8  -1    1.66    2.42   0
   8  -5   4    8.31    1.61   0
   8  -2   6  171.39    2.86   0
  -1   1  -6  291.09    2.95   0
  -1   1  -5  208.80    2.64   0
  -1   1  -4 4779.21   12.94   0
  -1   2  -8    0.41    0.90   0
  -1   2  -2 1540.64    8.28   0
  -1   3  -9   92.37    1.67   0
  -1   3  -1  763.42    6.14   0
  -1   5 -10   -0.29    1.63   0
  -1   5   0 2420.61   10.80   0
  -1   6 -10  116.07    1.87   0
  -1   6   0  230.23    3.27   0
  -1   7 -10   31.06    1.55   0
  -1   7   0  400.52    4.10   0
  -1   8 -10   -0.40    1.91   0
  -1   8   0  540.91    4.72   0
  -1   9  -9  140.98    2.14   0
  -1  10  -9    0.56    2.07   0
  -1  10  -8  106.01    2.00   0
  -1  10  -1   35.35    1.74   0
  -1  11  -8   43.51    2.26   0
  -1  11  -7    9.03    1.59   0
  -1  11  -3    3.18    1.18   0
  -1  11  -2  120.21    2.30   0
  -1  12  -5  201.17    2.73   0
   0  -2  -6   16.09    1.37   0
   0  -2  -5  282.21    3.95   0
   0  -2  -4  146.91    3.46   0
   0  -1  -9   29.09    1.49   0
   0   0 -10  139.67    2.14   0
   0   1 -11  120.25    1.97   0
   0   3 -12    0.30    1.41   0
   0  14  -2  118.57    3.00   0
   1  -3  -9  320.00    3.73   0
   1  -1 -12    0.66    1.65   0
   1   1   3  206.41    3.48   0
   1  13   2  140.08    3.52   0
   1  14   1   -0.40    1.81   0
   2  -5  -8    5.42    1.73   0
   2  -2 -13    1.37    2.10   0
   3  -5   0  260.27    3.11   0
   3   3   6  219.52    2.83   0
   4  -7  -3   50.34    1.67   0
   4  -1   5   39.48    1.45   0
   4   1   6  616.10    4.05   0
   4   4   7   57.63    1.58   0
   4   5   7  467.77    4.12   0
   4   6   7   -0.80    1.55   0
   4   7   7  105.32    2.52   0
   4   8   7  138.74    2.91   0
   5  -7  -1   37.39    1.43   0
   5  -6   1   31.02    1.24   0
   5  -2   5   29.39    1.42   0
   5   2   7  558.19    3.77   0
   6  -7   0  144.27    2.19   0
   6  -5   3  124.75    1.88   0
   6  -4   4    3.35    1.04   0
   6  -1   6    4.37    1.45   0
   6   1   7  251.16    2.53   0
   7  -8  -2    0.67    1.97   0
   7  -6   2    9.41    1.60   0
   7  -3   5    0.20    1.59   0
   8  -7   1   15.59    1.70   0
   8  -6   2   17.54    2.18   0
   8  -3   5   81.10    2.37   0
  -1   1  -7   94.89    1.74   0
  -1   1  -3  206.13    3.05   0
  -1   2  -9  360.39    3.15   0
  -1   3 -10  133.41    2.14   0
  -1   4 -10  423.53    3.24   0
  -1   6 -11   -0.45    1.81   0
  -1   7 -11   11.15    2.00   0
  -1   9 -10   25.61    1.82   0
  -1   9   0   47.64    1.81   0
  -1  12  -7   51.24    2.00   0
  -1  12  -6   23.43    1.73   0
  -1  12  -4    0.13    1.35   0
  -1  12  -3  132.68    2.46   0
   0  -2  -7   40.30    1.67   0
   0   2 -12   41.20    1.65   0
   0  10   2    9.06    1.59   0
   0  12   1    6.81    1.61   0
   0  13   0   -0.73    1.92   0
   1  -4  -6   57.49    2.66   0
   1  -4  -5  874.27   12.14   0
   1  -2 -11  168.31    2.58   0
   1   0 -13    0.71    1.58   0
   1   4   4  323.55    5.09   0
   2  -5  -3  119.22    3.34   0
   2  -3 -12  137.73    2.69   0
   2  -3   1    5.53    1.00   0
   2  -1   3  255.73    3.04   0
   2   3   5   23.18    1.25   0
   3  -6  -3  234.97    3.74   0
   3  -5 -11    0.44    2.01   0
   3  -1   4  447.52    3.58   0
   3   4   6    6.87    1.33   0
   3   9   6   73.75    2.87   0
   4  -7  -4    3.87    1.31   0
   4  -6 -11    0.35    2.73   0
   4  -5   1  499.12    3.78   0
   5  -5   2  240.04    2.45   0
   5  -4   3  293.20    2.84   0
   5  -3   4   74.33    1.66   0
   5   0   6   -0.84    0.99   0
   5   3   7   -0.09    1.07   0
   6  -8  -8   -0.14    2.79   0
   6   2   7   53.41    1.83   0
   7  -7   0   40.69    1.62   0
   7  -5   3  184.02    2.19   0
   7  -4   4  145.21    1.98   0
   7  -1   6   13.36    1.36   0
   7   1   7   27.54    1.56   0
   8  -8  -2    0.06    1.81   0
   8  -7   0   12.29    2.19   0
   8  -5   3   65.16    1.87   0
   8  -4   4    0.62    1.49   0
   8  -1   6   73.44    1.94   0
  -2   6  -6    5.26    1.32   0
  -2   6  -5  112.90    1.96   0
  -2   7  -6   38.42    1.59   0
  -2   7  -5  421.72    3.38   0
  -2   8  -6    0.96    1.34   0
  -2   8  -5  425.16    3.32   0
  -1   1  -8  624.02    4.13   0
  -1   4 -11    0.54    1.73   0
  -1   4   0  537.73    5.54   0
  -1   5 -11   47.76    1.64   0
  -1  11  -1  324.58    3.32   0
  -1  12  -2    0.35    1.73   0
  -1  13  -5    0.92    1.74   0
  -1  13  -4   53.19    2.41   0
   0  -2  -8  292.56    3.54   0
   0  -1 -10    3.69    1.40   0
   0   0 -11    0.58    1.17   0
   0   1 -12    7.91    1.44   0
   0   3 -13   18.98    1.80   0
   0  14  -1    8.72    1.78   0
   1  -3 -10  250.97    3.49   0
   1  12   3  135.62    4.19   0
   2  -4 -11   93.49    2.72   0
   2  -2   2  281.24    3.23   0
   2   1   4  332.42    3.60   0
   2   4   5   10.16    1.37   0
   3  -4   1  308.59    3.14   0
   3  -2   3  449.37    3.66   0
   3   1   5   69.29    1.57   0
   3   5   6   38.38    1.66   0
   4  -7  -5    5.33    1.43   0
   4  -6  -1  340.75    3.36   0
   4  -4   2  218.64    2.59   0
   4  -3   3  633.10    4.07   0
   4  -2   4  202.94    2.28   0
   4   2   6  132.19    2.14   0
   5  -7  -2  922.49    5.53   0
   5  -6   0  117.59    2.11   0
   5   4   7  283.54    2.87   0
   5   9   7   -0.07    2.29   0
   6  -8  -5   58.19    2.40   0
   6  -7  -1  118.42    2.01   0
   6  -6   1   17.51    1.20   0
   6  -3   4  225.72    2.43   0
   6  -2   5    5.23    1.09   0
   6   0   6  194.67    2.21   0
   6   3   7  286.36    3.05   0
   7  -8  -3    2.76    1.51   0
   7  -6   1   52.84    1.92   0
   7  -2   5    1.35    1.51   0
   7   2   7    0.00    1.42   0
   8  -2   5    2.31    1.90   0
  -2   4  -6  130.10    2.01   0
  -2   4  -5    8.71    1.24   0
  -2   5  -7   18.84    1.03   0
  -2   5  -6   55.42    1.41   0
  -2   5  -5   27.10    1.21   0
  -2   5  -4   36.84    1.23   0
  -2   6  -8    2.88    1.39   0
  -2   6  -7  295.99    2.65   0
  -2   6  -4 1382.61    5.85   0
  -2   6  -3   92.15    1.95   0
  -2   7  -8   68.42    1.57   0
  -2   7  -7    1.58    1.01   0
  -2   7  -4   50.59    1.53   0
  -2   7  -3 1752.51    6.78   0
  -2   8  -8  131.48    2.30   0
  -2   8  -7   99.61    1.74   0
  -2   8  -4   95.89    1.73   0
  -2   9  -7   74.50    2.05   0
  -2   9  -6  504.95    3.51   0
  -2   9  -5   26.75    1.29   0
  -2   9  -4   99.32    2.03   0
  -1   0  -7   19.26    1.35   0
  -1   0  -6    0.23    0.77   0
  -1   0  -5 2994.36   10.22   0
  -1   1  -9   30.20    1.27   0
  -1   2 -10   68.20    1.60   0
  -1   2  -1   31.98    2.24   0
  -1   3 -11  111.24    1.93   0
  -1   5 -12   -0.52    2.25   0
  -1  10   0  791.47    5.43   0
  -1  13  -3   51.75    1.89   0
   0   2 -13   46.10    1.98   0
   1  -4  -7   51.77    2.24   0
   1  -2 -12    7.49    1.94   0
   1  -1 -13    2.22    2.18   0
   1   0   2    0.44    1.19   0
   3  -5  -1  243.84    3.21   0
   3  -3   2  259.76    2.81   0
   3   6   6    2.34    1.37   0
   3   7   6  175.90    3.13   0
   3   8   6    1.76    1.41   0
   3  12   5    6.52    3.19   0
   4  -7  -7  218.03    5.00   0
   4  -7  -6  126.20    3.37   0
   4   0   5   -1.34    0.87   0
   4  11   6  256.29    4.76   0
   5  -1   5   50.50    1.34   0
   5   1   6  756.21    4.27   0
   5   5   7    2.06    1.18   0
   5   6   7    9.68    1.65   0
   5   7   7    0.48    1.71   0
   5   8   7   36.07    1.86   0
   6  -8  -7    0.10    1.65   0
   6  -8  -6   12.42    1.66   0
   6  -5   2    4.44    1.05   0
   6  -4   3   17.07    1.12   0
   6   4   7   97.04    2.16   0
   7  -7  -1    5.69    1.34   0
   7  -5   2  106.72    1.82   0
   7  -4   3    2.08    1.58   0
   7  -3   4    3.23    1.16   0
   7   0   6   -0.11    1.27   0
   7   3   7   16.29    1.66   0
   8  -7  -1   18.68    1.70   0
   8  -6   1   -0.67    1.46   0
   8  -5   2   46.07    2.01   0
   8  -4   3   -0.35    1.95   0
   8  -3   4    0.94    1.43   0
   8   0   6  264.57    2.76   0
  -2   4  -8  101.03    1.94   0
  -2   4  -7  237.04    2.45   0
  -2   4  -4  928.42    5.03   0
  -2   5  -9   50.59    1.75   0
  -2   5  -8   28.58    1.23   0
  -2   5  -3 1521.20    6.45   0
  -2   6  -9    0.42    1.09   0
  -2   7  -9   11.65    1.36   0
  -2   8  -9   32.07    1.57   0
  -2   8  -3  122.33    1.94   0
  -2   9  -9   -0.00    2.01   0
  -2   9  -8   21.03    1.41   0
  -2   9  -3    3.07    1.07   0
  -2  10  -8    7.40    2.14   0
  -2  10  -7   11.51    1.43   0
  -2  10  -6   -0.38    1.26   0
  -2  10  -5  354.32    3.02   0
  -2  10  -4   47.73    1.51   0
  -2  11  -6   38.08    2.12   0
  -2  11  -5   24.98    1.78   0
  -1   0  -8    0.05    0.92   0
  -1   0  -4   -0.12    0.89   0
  -1   1 -10  281.56    2.93   0
  -1   1  -2  458.88    4.94   0
  -1   2 -11    3.14    1.21   0
  -1   4 -12    2.04    1.55   0
  -1   7   1  145.44    3.01   0
  -1  11   0   29.75    1.69   0
  -1  12  -1  110.91    2.25   0
  -1  13  -2  139.47    2.47   0
   0  -2  -9   -0.54    0.90   0
   0  -2  -3 1052.07   10.89   0
   0  -1 -11  132.60    2.45   0
   0   0 -12   83.92    1.92   0
   0   1 -13   15.58    1.73   0
   0  11   2   47.23    2.26   0
   0  13   1  191.00    3.53   0
   0  14   0    0.11    2.28   0
   1  -4  -8  328.23    4.63   0
   1  -1   1  205.02    3.94   0
   1   5   4   15.10    1.57   0
   1  14   2   54.16    3.31   0
   2  -5  -9   47.64    2.40   0
   2   5   5   29.38    1.71   0
   2   9   5   33.50    2.53   0
   3  -6  -4    0.38    1.11   0
   3   0   4    1.55    1.05   0
   3   2   5  471.56    3.92   0
   4  -5   0  149.72    2.33   0
   4   3   6   87.15    1.72   0
   5  -5   1  901.39    4.80   0
   5  -3   3  540.07    3.74   0
   5  -2   4   36.11    1.33   0
   5   2   6   95.60    1.93   0
   6  -7  -2   31.66    1.42   0
   6  -6   0   19.02    1.20   0
   6  -1   5  159.44    2.00   0
   6   1   6    5.96    1.07   0
   6   5   7   42.62    1.71   0
   6   6   7    1.09    2.02   0
   6   7   7   58.39    2.46   0
   7  -8  -6    6.31    2.41   0
   7  -1   5    6.56    1.29   0
   7   1   6   12.54    1.36   0
   7   4   7  148.94    2.31   0
   7   5   7    0.15    2.05   0
   8  -1   5  470.51    3.31   0
   8   1   6   75.35    1.93   0
  -2   3  -8  204.84    2.51   0
  -2   3  -7   38.35    1.29   0
  -2   3  -6  549.08    3.63   0
  -2   3  -5   24.13    1.05   0
  -2   3  -4  150.99    2.29   0
  -2   4  -9    0.26    0.99   0
  -2   4  -3 1542.30    6.50   0
  -2   5 -10   33.90    1.90   0
  -2   6 -10   11.64    1.33   0
  -2   6  -2  169.23    2.33   0
  -2   7 -10   62.48    1.74   0
  -2   7  -2   60.74    1.58   0
  -2   8 -10    1.45    1.58   0
  -2   8  -2  395.03    3.42   0
  -2   9  -2  341.54    3.32   0
  -2  10  -3   -1.34    1.05   0
  -2  11  -7   81.23    1.99   0
  -2  11  -4  120.06    2.06   0
  -2  12  -6   25.79    2.40   0
  -1   0  -9  709.75    4.42   0
  -1   3 -12    2.25    1.44   0
  -1   3   0 2559.32   12.93   0
  -1   6   1  938.45    7.47   0
  -1   8   1  684.52    5.79   0
   1  -3 -11    0.16    1.18   0
   1   2   3 2412.16   12.44   0
   2  -5  -4 1146.45   11.92   0
   2   0   3    0.17    0.85   0
   2   2   4 2431.46    9.75   0
   2   6   5  112.55    2.82   0
   3  -5 -12    0.79    2.67   0
   4  -1   4  434.77    3.29   0
   4   1   5   39.80    1.31   0
   4   4   6    2.96    1.03   0
   4  10   6    3.83    2.09   0
   5  -7  -4  290.09    3.59   0
   5  -6  -1   48.45    1.50   0
   5  -4   2  542.19    3.61   0
   5   0   5    6.38    0.93   0
   6  -5   1  446.25    3.28   0
   6  -2   4   10.17    1.04   0
   6   2   6  222.39    2.50   0
   7  -7  -2  106.72    2.04   0
   7  -6   0   67.35    1.64   0
   7  -2   4   81.78    1.83   0
   7   2   6    2.05    1.77   0
   8  -7  -2    1.40    1.61   0
   8  -6   0    2.44    1.46   0
   8  -5   1   58.06    2.10   0
   8  -2   4   39.73    1.62   0
   8   2   6  180.34    2.48   0
   9  -4   2   15.75    1.80   0
   9  -3   3  162.84    2.39   0
  -2   2  -7  317.42    3.00   0
  -2   2  -6    2.98    1.13   0
  -2   3  -9  458.99    3.30   0
  -2   4 -10    0.71    1.15   0
  -2   5 -11  147.03    2.56   0
  -2   5  -2  808.94    5.02   0
  -2   6 -11    3.07    1.60   0
  -2   7 -11   14.87    1.79   0
  -2  10  -2   47.15    1.77   0
  -2  11  -3   21.00    1.34   0
  -2  12  -5  194.35    2.57   0
  -2  12  -4    9.07    1.51   0
  -1  -1  -7   93.73    2.02   0
  -1  -1  -6  300.91    3.42   0
  -1   0 -10   -0.50    1.39   0
  -1   0  -3  965.31    6.82   0
  -1   1 -11   11.26    1.20   0
  -1   2 -12    0.08    1.37   0
  -1   9   1    2.84    1.01   0
  -1  12   0  208.70    3.16   0
  -1  13  -1  112.94    2.40   0
  -1  14  -2   57.19    2.17   0
   0  -2 -10  106.68    2.10   0
   0  -1 -12    6.94    1.92   0
   0   0 -13   -0.31    1.59   0
   1  -4  -9  279.85    4.12   0
   1  -2 -13    0.33    1.73   0
   1   6   4   65.71    3.04   0
   2  -4 -12    0.03    1.54   0
   2  -3   0  457.91    4.67   0
   2   7   5  427.53    5.47   0
   2   8   5  427.99    5.97   0
   3  -6  -5  129.39    3.58   0
   3  -4   0  588.49    4.52   0
   3  -1   3    5.87    1.05   0
   3   3   5  365.53    3.59   0
   4  -4   1   87.17    1.73   0
   4  -3   2   83.63    1.80   0
   4  -2   3  319.13    2.89   0
   4   5   6    7.12    1.05   0
   5  -1   4   90.58    1.84   0
   5   3   6   65.72    1.57   0
   6  -7  -3  175.60    2.52   0
   6  -6  -1   99.13    2.01   0
   6  -4   2  322.43    2.75   0
   6  -3   3  140.80    1.86   0
   6   0   5    0.34    1.01   0
   6   3   6  256.63    2.83   0
   7  -7  -3   -0.95    1.81   0
   7  -5   1    2.90    1.15   0
   7  -4   2  328.44    2.73   0
   7  -3   3  394.17    2.98   0
   7   0   5    1.47    1.14   0
   8  -7  -3   40.36    2.26   0
   8  -6  -1    9.20    2.01   0
   8  -4   2    0.59    1.32   0
   8  -3   3    8.41    1.39   0
   8   0   5    0.25    1.45   0
   8   3   6   33.01    1.89   0
  -2   2  -9   14.68    1.44   0
  -2   2  -8  666.75    4.06   0
  -2   2  -5  159.20    2.17   0
  -2   3 -10   28.07    1.38   0
  -2   3  -3    2.72    0.91   0
  -2   4 -11   15.44    1.47   0
  -2   4  -2  284.09    3.16   0
  -2   7  -1  489.10    4.10   0
  -2   8  -1  272.92    3.14   0
  -2   9  -1    1.39    1.17   0
  -2  11  -2   29.87    1.78   0
  -2  12  -3   31.99    1.58   0
  -2  13  -4    0.59    2.13   0
  -1  -1  -8  626.48    4.43   0
  -1  -1  -5  211.76    3.11   0
  -1   1 -12   89.90    2.38   0
  -1   5   1 1555.37   10.11   0
  -1  10   1   25.77    1.69   0
   0  -3  -7   34.46    1.73   0
   0  -2 -11    2.34    1.56   0
   0  12   2  175.75    3.77   0
   1  -3 -12    0.37    2.00   0
   2  -5 -10   51.51    2.69   0
   2  -2   1  409.19    4.30   0
   2  -1   2  280.67    3.40   0
   3  -3   1 1289.65    6.48   0
   3  -2   2  608.33    4.32   0
   3   1   4  458.79    3.77   0
   4   0   4  338.88    3.10   0
   4   2   5   88.88    1.91   0
   4   6   6   46.89    1.58   0
   4   7   6  168.25    2.80   0
   4   8   6    3.64    1.64   0
   4   9   6  272.58    3.66   0
   5  -7  -5    2.70    1.43   0
   5  -6  -2   83.06    2.02   0
   5  -5   0   62.93    1.60   0
   5  -2   3 1612.24    6.14   0
   5   1   5   57.09    1.42   0
   5   4   6  349.38    3.10   0
   6  -1   4   55.73    1.62   0
   6   1   5  169.72    2.35   0
   6   4   6  271.70    2.93   0
   7  -6  -1  188.49    2.39   0
   7  -1   4  120.44    2.11   0
   7   3   6  289.22    2.78   0
   7   4   6   35.44    2.07   0
   8  -7  -4   17.85    2.47   0
   8  -1   4   18.84    1.40   0
   8   1   5  495.65    3.38   0
   9  -5   0  214.02    2.62   0
   9  -4   1   40.61    2.42   0
   9  -3   2    2.97    2.20   0
   9  -2   3   -0.17    1.74   0
  -3   6  -7  395.07    3.16   0
  -3   6  -6    3.61    1.21   0
  -3   7  -8  364.20    3.16   0
  -3   7  -7  165.55    2.10   0
  -3   7  -6  160.53    2.06   0
  -3   7  -5    8.09    1.35   0
  -3   8  -8   11.61    1.89   0
  -3   8  -7  179.55    2.21   0
  -3   8  -6    2.47    1.05   0
  -3   8  -5    1.46    1.34   0
  -3   9  -8   47.57    2.02   0
  -3   9  -7    3.61    1.80   0
  -3   9  -6   81.65    2.03   0
  -2   1  -8  231.97    2.68   0
  -2   1  -7    3.69    1.21   0
  -2   1  -6   35.29    1.51   0
  -2   2 -10   21.85    1.67   0
  -2   2  -4 2292.73    8.12   0
  -2   3 -11   52.36    1.65   0
  -2   4 -12   -1.08    2.23   0
  -2   6  -1   32.81    1.36   0
  -2  10  -1  102.31    2.27   0
  -2  12  -2   -0.52    1.67   0
  -2  13  -3    0.20    1.97   0
  -1  -1  -9   30.51    1.32   0
  -1   0 -11  202.78    2.54   0
  -1  13   0   10.80    1.90   0
  -1  14  -1    0.19    1.79   0
   0  -3  -8    7.27    1.05   0
   0  -3  -6  505.58    5.39   0
   0  -1 -13   13.08    2.30   0
   0   8   3  711.39   11.70   0
   0  14   1   10.53    2.46   0
   1  -4 -10   43.50    2.06   0
   1   7   4   95.41    3.85   0
   1   8   4  200.04    6.30   0
   3   4   5    3.20    1.20   0
   4  -5  -1   89.64    1.84   0
   5  -7  -9   43.54    3.18   0
   5  -7  -6   59.00    2.29   0
   5  -4   1   80.11    1.65   0
   5  -3   2  593.32    3.78   0
   5   5   6    9.43    1.16   0
   5   6   6   25.37    1.76   0
   5  10   6   78.14    2.45   0
   6  -6  -2  138.04    2.41   0
   6  -5   0    1.00    0.95   0
   6  -2   3  140.48    2.02   0
   6   5   6  202.79    2.75   0
   7  -7  -4    0.00    1.39   0
   7  -5   0    1.33    1.11   0
   7  -2   3   -1.42    1.38   0
   7   1   5    8.82    1.24   0
   7   5   6  395.47    3.64   0
   8  -6  -2   18.95    1.93   0
   8  -5   0  218.54    2.49   0
   8  -4   1   22.66    1.44   0
   8  -3   2   27.87    1.77   0
   8  -2   3   -0.02    1.24   0
   8   2   5    6.17    2.08   0
  -3   5  -8  954.85    4.60   0
  -3   5  -7  168.00    2.07   0
  -3   5  -6   39.97    1.28   0
  -3   6  -9  179.91    2.24   0
  -3   6  -8   35.81    1.34   0
  -3   6  -5  692.00    4.01   0
  -3   7 -10   -0.20    2.08   0
  -3   7  -9   66.16    1.78   0
  -3   7  -4  865.50    4.75   0
  -3   8  -9   82.61    1.98   0
  -3   8  -4  511.79    3.73   0
  -3   9  -9  176.27    2.49   0
  -3   9  -5   30.36    1.38   0
  -3   9  -4  162.96    2.41   0
  -3  10  -8    0.11    1.73   0
  -3  10  -7    2.20    1.47   0
  -3  10  -6   13.60    1.41   0
  -3  10  -5    8.00    1.30   0
  -3  11  -7   67.44    2.57   0
  -3  11  -6    0.30    2.15   0
  -2   1  -9  996.08    4.99   0
  -2   1  -5   17.56    1.01   0
  -2   2 -11    0.59    1.70   0
  -2   2  -3  396.86    3.74   0
  -2   3 -12    0.06    2.10   0
  -2   3  -2  179.76    2.75   0
  -2   5  -1  343.50    3.51   0
  -2  11  -1   -0.05    1.53   0
  -1  -1 -10  268.20    2.98   0
  -1  -1  -4 5045.90   15.12   0
  -1   0 -12    0.10    1.92   0
  -1   1 -13    5.78    1.75   0
  -1  11   1    3.85    1.10   0
   0  -3  -9  377.66    3.99   0
   0  -3  -5 2011.01   12.15   0
   0  -2 -12   40.66    2.21   0
   0   7   3  146.84    7.59   0
   1  -3  -2  840.89   11.69   0
   1  13   3   49.36    3.89   0
   2  -4  -2 1877.98   11.07   0
   2   1   3  261.53    3.41   0
   2   3   4  150.19    2.64   0
   3  -6  -6    9.00    1.69   0
   3  11   5    0.07    1.94   0
   4  -4   0    2.29    1.13   0
   4  -1   3 3082.13    8.81   0
   4   3   5   69.89    1.65   0
   5  -7  -8   51.11    2.67   0
   5  -7  -7    2.19    1.80   0
   5   0   4   -0.71    0.89   0
   5   2   5   28.36    1.19   0
   5   7   6    1.97    1.25   0
   5   8   6   84.57    2.10   0
   5   9   6   -0.04    1.54   0
   6  -7  -5   39.30    1.71   0
   6  -4   1   91.89    1.67   0
   6  -3   2    3.11    0.99   0
   6   0   4  846.12    4.41   0
   6   2   5    5.87    1.05   0
   6   6   6  200.69    2.55   0
   6   7   6   36.13    2.17   0
   6   8   6   89.70    2.65   0
   7  -6  -2   17.05    1.31   0
   7  -4   1  121.17    1.87   0
   7  -3   2  629.92    3.73   0
   7   0   4    1.46    1.36   0
   7   2   5    4.76    1.24   0
   7   6   6   -0.36    1.63   0
   8   0   4    0.89    1.34   0
   9  -5  -1   42.63    1.93   0
   9  -4   0   32.88    2.31   0
   9  -2   2    3.00    2.11   0
   9  -1   3   23.83    1.74   0
  -3   4  -9   97.44    2.03   0
  -3   4  -8   31.83    1.30   0
  -3   4  -7  170.98    2.07   0
  -3   4  -6    5.39    1.06   0
  -3   5 -10   -0.00    1.76   0
  -3   5  -9   33.00    1.38   0
  -3   5  -5  112.57    1.81   0
  -3   5  -4 1013.96    5.07   0
  -3   6 -11    2.02    2.15   0
  -3   6 -10    0.27    1.47   0
  -3   6  -4  251.09    2.63   0
  -3   8  -3  274.05    2.93   0
  -3  10  -4    2.13    1.16   0
  -3  11  -5    0.25    1.40   0
  -3  11  -4    3.85    1.65   0
  -2   1 -10   46.34    1.47   0
  -2   1  -4  337.96    3.36   0
  -2   2 -12   65.68    2.24   0
  -2  13  -2   -1.27    1.59   0
  -1  -1 -11    8.18    1.68   0
  -1   0  -2    0.29    1.77   0
  -1   1  -1  211.78    3.88   0
   0  -3 -10    5.32    1.54   0
   0   9   3   23.39    2.59   0
   1  -4 -11   76.73    2.58   0
   1  -3 -13    6.53    1.83   0
   2  -5 -11   14.52    2.39   0
   3  -4  -1 1714.51    8.18   0
   3   0   3  194.60    2.48   0
   3   2   4  303.33    3.26   0
   3   5   5  115.01    2.25   0
   4  -6  -4   38.83    1.73   0
   4  -3   1    2.53    1.06   0
   4  -2   2 1009.52    5.15   0
   4   1   4  434.98    3.39   0
   5  -6  -3  540.31    4.34   0
   5  -5  -1   21.91    1.19   0
   5  -1   3   23.92    1.32   0
   5   3   5  151.33    2.30   0
   6  -7  -6    1.16    1.68   0
   6  -5  -1    5.20    1.39   0
   7  -5  -1    2.11    1.49   0
   7  -1   3   66.28    1.77   0
   7   3   5    1.13    1.71   0
   8  -6  -3    5.85    1.52   0
   8  -5  -1    7.27    1.37   0
   8  -4   0  154.80    2.45   0
   8  -2   2  302.56    2.93   0
   8  -1   3   45.69    1.56   0
   8   1   4   16.07    1.73   0
   8   3   5   92.36    1.99   0
   9  -5  -2   22.46    2.43   0
   9  -3   1   83.30    1.98   0
  -3   3  -9    0.76    1.33   0
  -3   3  -8  300.36    2.62   0
  -3   3  -7  203.07    2.32   0
  -3   3  -6  224.99    2.56   0
  -3   4 -10    1.48    1.29   0
  -3   4  -5    1.75    0.85   0
  -3   5 -11   48.63    1.82   0
  -3   6  -3 1234.06    5.54   0
  -3   7  -3   58.66    1.55   0
  -3   9  -3  435.46    3.36   0
  -3  10  -3  182.33    2.33   0
  -3  12  -5    3.48    1.70   0
  -3  12  -4    1.11    2.13   0
  -2   0  -9   -1.34    1.43   0
  -2   0  -8 1371.50    6.05   0
  -2   0  -7   -1.96    0.92   0
  -2   0  -6   18.20    1.26   0
  -2   1 -11   54.93    1.69   0
  -2   4  -1    4.64    0.91   0
  -2   7   0  296.85    3.50   0
  -2   8   0 1028.44    6.15   0
  -2   9   0  118.92    2.28   0
  -2  10   0    1.61    1.28   0
  -2  12  -1   43.59    1.69   0
  -1  -2  -9  340.81    3.59   0
  -1  -2  -8    0.79    0.89   0
  -1  -2  -7    8.78    1.32   0
  -1   0 -13   10.31    1.77   0
  -1   4   1 1990.34   12.57   0
  -1  12   1    7.58    1.36   0
  -1  14   0    0.08    2.36   0
   0  -3 -11    0.39    1.54   0
   0  -2 -13   43.90    2.61   0
   0  13   2    9.78    2.15   0
   1   1   2  474.59    5.83   0
   1   3   3  933.91    8.34   0
   3  -6  -7   27.85    2.68   0
   3  -5  -3  187.02    3.29   0
   3   6   5  702.44    5.44   0
   3  10   5    6.29    1.80   0
   4  -5  -2 1002.93    6.02   0
   4   4   5   88.22    1.76   0
   5  -4   0  615.97    4.01   0
   5  -3   1  970.89    4.94   0
   5  -2   2   16.06    1.39   0
   5   1   4   82.83    1.58   0
   6  -7  -8   11.19    2.42   0
   6  -7  -7    1.31    1.90   0
   6  -6  -3    3.35    1.16   0
   6  -4   0    6.66    1.30   0
   6  -1   3   81.84    1.51   0
   6   1   4   57.32    1.74   0
   6   3   5   -0.08    1.08   0
   7  -7  -7   62.54    2.68   0
   7  -6  -3    1.56    1.25   0
   7  -4   0   56.94    1.68   0
   7  -3   1  556.51    3.75   0
   7  -2   2   33.80    1.59   0
   7   1   4  128.09    1.89   0
   7   4   5  101.06    2.23   0
   8  -3   1  242.53    2.46   0
   8   4   5   -0.16    1.60   0
   9  -4  -1   50.66    2.37   0
   9  -1   2   30.80    2.16   0
   9   0   3   38.06    1.77   0
  -3   3 -10   33.16    1.45   0
  -3   3  -5  357.47    2.97   0
  -3   4 -11    0.01    1.47   0
  -3   4  -4   70.72    1.53   0
  -3   5  -3    9.71    0.98   0
  -3   7  -2   89.79    1.88   0
  -3   8  -2  365.55    3.32   0
  -3   9  -2   32.41    1.71   0
  -3  11  -3  173.50    2.37   0
  -2   0 -10    3.92    1.13   0
  -2   0  -5   -0.28    1.13   0
  -2   1 -12   24.51    1.66   0
  -2   6   0 1648.06    8.03   0
  -2  11   0   54.68    1.91   0
  -2  13  -1    1.23    2.00   0
  -1  -2 -10   71.76    2.07   0
  -1  -2  -6    4.65    0.87   0
  -1  -1 -12   84.50    2.05   0
  -1   2   0  183.55    3.96   0
   2   0   2 2927.71   10.98   0
   2   4   4  955.20    6.73   0
   3  -3   0  252.03    3.16   0
   3  -2   1 1732.04    7.48   0
   3  -1   2   81.84    1.74   0
   3   7   5    8.06    1.35   0
   3   8   5    0.11    1.39   0
   3   9   5   32.63    1.95   0
   4   0   3   -2.73    1.20   0
   4   2   4  207.39    2.60   0
   4   5   5   61.52    1.76   0
   5   4   5   50.20    1.46   0
   6  -3   1  856.86    4.43   0
   6  -2   2  338.74    2.76   0
   6   4   5  311.25    2.83   0
   7  -6  -4   72.90    2.28   0
   7   5   5   11.73    1.98   0
   8  -6  -4   71.32    2.07   0
   8  -5  -2   26.80    1.54   0
   8   0   3   -0.39    1.21   0
   8   2   4   50.24    1.65   0
   9  -3   0  122.18    2.14   0
   9  -2   1   59.68    1.85   0
   9   1   3   23.65    1.72   0
  -4   7  -9   32.79    2.01   0
  -4   7  -8    7.37    1.77   0
  -4   7  -7  104.55    2.14   0
  -4   8  -9   12.70    2.30   0
  -4   8  -8  148.71    2.27   0
  -4   8  -7  136.40    2.04   0
  -4   8  -6    1.92    1.55   0
  -4   9  -8   12.29    1.77   0
  -4   9  -7   52.47    1.78   0
  -4   9  -6  295.69    2.89   0
  -4  10  -7   71.47    2.40   0
  -3   2 -10   20.42    1.64   0
  -3   2  -9    5.24    1.04   0
  -3   2  -8    3.21    0.96   0
  -3   2  -7   -0.27    0.91   0
  -3   2  -6   34.44    1.20   0
  -3   3 -11   40.74    1.67   0
  -3   3  -4  231.62    2.65   0
  -3   4  -3  477.47    3.69   0
  -3   6  -2  523.99    3.90   0
  -3  10  -2  562.24    4.08   0
  -3  11  -2    8.90    1.63   0
  -3  12  -3    0.62    1.46   0
  -2   0 -11    0.00    1.23   0
  -2   1  -3  252.10    3.01   0
  -2   2  -2  286.00    3.30   0
  -2   3  -1    5.41    1.36   0
  -2   5   0  430.32    4.32   0
  -1  -2 -11    4.15    1.57   0
  -1  -2  -5 1888.97    9.36   0
  -1  -1 -13    3.54    2.32   0
  -1  -1  -3  215.24    3.66   0
  -1   8   2   42.78    2.08   0
  -1   9   2   38.35    2.07   0
  -1  13   1   31.43    2.28   0
   0  -3 -12    1.16    1.94   0
   0  -1  -1 1333.52   25.16   0
   0  10   3  555.80    9.43   0
   1  -4 -12    5.70    1.57   0
   2  -5  -5  124.30    4.60   0
   2  12   4   10.77    2.90   0
   3  -6  -8   60.65    4.04   0
   3   3   4  224.18    2.77   0
   4  -6  -5    0.68    0.88   0
   4  -4  -1    0.83    1.14   0
   4   6   5  127.54    2.39   0
   4  11   5    1.47    1.61   0
   5  -5  -2 1384.98    6.55   0
   5   0   3  373.59    2.95   0
   5   2   4   36.22    1.51   0
   5   5   5   18.24    1.18   0
   6  -6  -4  139.47    2.37   0
   6  -5  -2  678.10    4.37   0
   6   0   3    0.54    0.92   0
   6   2   4    9.84    1.26   0
   6   5   5    0.88    1.13   0
   7  -5  -2  267.09    2.72   0
   7   0   3  128.06    1.86   0
   7   2   4   91.61    1.71   0
   7   6   5   68.62    1.91   0
   8  -6  -5   91.04    2.28   0
   8  -4  -1   31.26    1.51   0
   8  -3   0  158.22    2.31   0
   8  -2   1   62.05    1.87   0
   8  -1   2   -1.10    1.33   0
   8   1   3   47.72    1.94   0
   8   3   4   -0.40    1.38   0
   9  -4  -2    0.01    2.15   0
   9   0   2    0.37    1.91   0
   9   2   3    0.08    2.28   0
  -4   5  -9  180.84    2.50   0
  -4   5  -8   52.78    1.84   0
  -4   5  -7  458.58    3.32   0
  -4   6 -10   12.06    2.23   0
  -4   6  -9  101.47    1.92   0
  -4   6  -8  234.56    2.43   0
  -4   6  -7    0.67    1.09   0
  -4   6  -6   44.26    1.37   0
  -4   7  -6  163.18    2.06   0
  -4   7  -5   75.55    1.90   0
  -4   8  -5   -0.22    1.09   0
  -4   9  -5    3.46    1.26   0
  -4  10  -6    2.33    1.49   0
  -4  10  -5   36.56    2.04   0
  -3   2 -11   36.06    2.14   0
  -3   2  -5  456.20    3.40   0
  -3   3 -12   16.99    1.82   0
  -3   5  -2  284.74    2.99   0
  -3  12  -2  169.50    2.84   0
  -3  13  -3    0.04    1.71   0
  -2  -1  -9 1023.10    5.69   0
  -2  -1  -8  229.36    2.86   0
  -2  -1  -7    5.05    1.20   0
  -2   0 -12    2.20    2.05   0
  -2   0  -4  372.40    3.66   0
  -2  12   0   -0.02    1.27   0
  -1   7   2  385.21    5.63   0
  -1  10   2   -0.37    1.43   0
   2  -5 -12    0.02    2.27   0
   2  -1   1 2591.86   10.67   0
   2   2   3  392.79    4.14   0
   2   5   4   35.77    1.79   0
   3   1   3    6.45    0.83   0
   4  -3   0    5.94    1.14   0
   4  -1   2   19.19    1.06   0
   4   7   5   71.18    2.00   0
   4   8   5   -0.27    1.49   0
   4   9   5    3.82    1.71   0
   4  10   5   40.75    2.11   0
   5  -6  -5  111.89    2.48   0
   5  -4  -1  112.86    2.04   0
   5  -1   2  617.96    3.88   0
   5   6   5  137.84    2.17   0
   5  10   5   12.15    2.21   0
   6  -4  -1  211.31    2.56   0
   6  -1   2   35.00    1.41   0
   6   6   5   81.90    1.83   0
   6   7   5  136.65    2.56   0
   7  -6  -5   21.49    1.56   0
   7  -4  -1    0.22    1.02   0
   7  -3   0  108.08    2.07   0
   7  -2   1  532.98    3.50   0
   7  -1   2  214.81    2.27   0
   7   3   4    2.84    1.15   0
   7   7   5   72.70    2.02   0
   8  -5  -3  131.75    2.24   0
   8   4   4    1.06    1.53   0
   9  -3  -1   66.73    1.90   0
   9  -2   0   15.49    1.91   0
   9  -1   1   90.76    1.93   0
  -4   4  -9  152.81    2.40   0
  -4   4  -8  281.35    2.76   0
  -4   4  -7   59.61    1.72   0
  -4   5 -10    0.05    1.52   0
  -4   5  -6    8.48    1.05   0
  -4   6  -5  119.10    1.86   0
  -4   7  -4  206.61    2.53   0
  -4   8  -4   33.34    1.29   0
  -4   9  -4    4.01    1.21   0
  -4  10  -4   93.05    2.21   0
  -4  11  -5    0.10    1.58   0
  -3   1 -10   60.04    1.90   0
  -3   1  -9  172.83    2.23   0
  -3   1  -8   44.86    1.40   0
  -3   1  -7   46.23    1.34   0
  -3   1  -6  659.18    4.20   0
  -3   2 -12   42.81    1.93   0
  -3   3  -3  758.26    4.61   0
  -3   7  -1  215.99    2.75   0
  -3   8  -1    4.43    0.96   0
  -3   9  -1  140.16    2.24   0
  -3  10  -1    1.71    1.46   0
  -2  -1 -10   40.13    1.45   0
  -2  -1  -6   33.05    1.52   0
  -2  13   0   12.26    1.93   0
  -1  -2 -12    1.37    1.48   0
   0  -4  -9    0.07    1.29   0
   0  -4  -8   71.97    2.26   0
   0  -3 -13   19.29    2.52   0
   0  -3  -4   90.09    3.27   0
   0  14   2  112.69    4.11   0
   1   0   1 7641.05   24.24   0
   2  -2   0  451.86    4.75   0
   3   4   4   69.32    1.98   0
   4  -6  -6  366.90    4.81   0
   4  -2   1   61.05    1.44   0
   4   1   3 3034.74    8.96   0
   4   3   4  582.72    4.06   0
   5  -3   0   27.02    1.34   0
   5  -2   1   80.10    1.55   0
   5   3   4   75.94    1.72   0
   5   7   5    2.63    1.15   0
   5   8   5   34.01    1.60   0
   5   9   5   25.96    1.64   0
   6  -5  -3   -0.69    1.37   0
   6  -3   0  323.35    2.79   0
   6  -2   1    0.47    0.88   0
   6   1   3   78.46    1.74   0
   6   3   4  217.79    2.37   0
   6   8   5   -0.04    1.42   0
   6   9   5   27.89    1.88   0
   7  -6  -6    1.52    2.06   0
   7  -5  -3   13.08    1.25   0
   7   1   3   62.91    1.54   0
   7   4   4  160.35    2.43   0
   8  -5  -4   13.33    2.07   0
   8  -4  -2   45.60    1.58   0
   8  -1   1  676.35    3.96   0
   8   0   2  323.41    2.73   0
   8   2   3   -0.54    1.31   0
   8   5   4    8.79    1.61   0
   9  -4  -3    9.81    2.15   0
   9   1   2   29.50    1.71   0
   9   3   3  163.10    2.41   0
  -4   3  -8   86.97    1.85   0
  -4   4 -11    1.11    2.25   0
  -4   4 -10   10.74    1.52   0
  -4   4  -6    0.28    0.96   0
  -4   5  -5   59.40    1.42   0
  -4   6  -4    2.61    0.95   0
  -4   9  -3    9.09    1.44   0
  -4  11  -4    0.27    1.45   0
  -4  12  -4   16.93    2.22   0
  -3   1 -11  129.85    2.17   0
  -3   2  -4  290.78    2.84   0
  -3   4  -2   39.16    1.31   0
  -3   6  -1  168.95    2.50   0
  -3  11  -1  166.64    2.48   0
  -3  13  -2    0.82    1.68   0
  -2  -1 -11   52.28    1.68   0
  -2   4   0  417.08    4.27   0
  -2   8   1    4.05    1.06   0
  -2   9   1  177.43    2.86   0
  -2  10   1  387.87    4.34   0
  -1  -3  -9   93.89    2.27   0
  -1  -3  -8  367.27    4.02   0
  -1  -2 -13   91.51    2.70   0
  -1   6   2   25.20    2.01   0
  -1  11   2   48.05    2.31   0
  -1  14   1    0.03    2.39   0
   0  -4 -10  671.04    5.95   0
   3  -5  -4  618.82    6.14   0
   3   0   2    0.63    0.77   0
   5  -6  -6  140.25    2.83   0
   5  -5  -3    3.98    0.97   0
   5   1   3   21.51    1.06   0
   6   4   4    7.18    1.44   0
   7  -4  -2  409.19    3.39   0
   7   0   2    0.47    0.99   0
   7   2   3   -0.58    1.46   0
   7   5   4    1.77    1.70   0
   8  -3  -1   55.83    1.59   0
   8  -2   0  279.26    2.56   0
   8   1   2   -1.51    1.70   0
   8   3   3    7.99    1.81   0
   8   6   4   82.49    2.10   0
   9  -3  -2    9.86    1.66   0
   9  -2  -1   49.97    2.18   0
   9  -1   0   19.93    2.09   0
   9   0   1   17.98    1.51   0
   9   2   2    2.43    2.11   0
  -4   3 -11    1.61    2.03   0
  -4   3 -10    4.05    1.39   0
  -4   3  -9   -0.09    1.17   0
  -4   3  -7  194.08    2.21   0
  -4   3  -6   88.46    1.82   0
  -4   4  -5   91.50    1.64   0
  -4   5  -4  421.49    3.23   0
  -4   7  -3    4.98    0.93   0
  -4   8  -3   43.14    1.40   0
  -4  10  -3    5.80    1.26   0
  -4  11  -3   80.23    2.36   0
  -3   0 -10    0.32    1.42   0
  -3   0  -9  552.99    3.72   0
  -3   0  -8    0.43    0.93   0
  -3   0  -7  218.69    2.65   0
  -3   1 -12  217.25    2.70   0
  -3   1  -5   65.43    1.49   0
  -3  12  -1   38.50    1.73   0
  -2  -1 -12   24.43    1.66   0
  -2  -1  -5   18.83    1.14   0
  -2   1  -2  278.11    3.41   0
  -2   7   1 1424.96    8.06   0
  -2  11   1   88.73    2.43   0
  -2  14   0   18.04    2.35   0
  -1  -3 -10  125.48    2.33   0
  -1  -3  -7    6.95    1.26   0
  -1  -2  -4  124.37    2.81   0
   0  -4 -11    2.16    1.78   0
   0  -4  -7  195.63    3.76   0
   0  11   3   53.78    3.72   0
   1  -5  -9   98.44    3.44   0
   1  -1   0 1003.53    9.56   0
   1   4   3   86.43    2.85   0
   2  -4  -3    0.03    0.95   0
   2   6   4 1368.56    8.72   0
   3   2   3  443.94    3.89   0
   4  -6  -7   66.62    2.66   0
   4  -4  -2  969.36    5.82   0
   4   0   2 3044.39    8.94   0
   4   4   4   10.93    1.01   0
   5   0   2   -0.69    1.12   0
   5   4   4  132.98    2.02   0
   6  -4  -2  346.36    3.20   0
   6   0   2    0.03    0.84   0
   6   2   3  144.43    2.06   0
   7  -5  -4    0.27    1.17   0
   7  -3  -1  187.03    2.21   0
   7  -2   0   22.99    1.43   0
   7  -1   1    6.32    0.99   0
   7   6   4    3.88    1.67   0
   8  -5  -5  427.18    3.72   0
   8  -4  -3    9.22    1.38   0
   9  -4  -4   -0.59    1.76   0
  -5   6  -9   52.83    2.21   0
  -5   6  -8   82.66    2.13   0
  -5   7  -8    0.36    1.55   0
  -5   7  -7   -1.00    1.84   0
  -5   8  -8   22.47    1.83   0
  -5   8  -7   37.24    1.72   0
  -5   8  -6   81.94    2.19   0
  -5   9  -7    0.00    1.68   0
  -5   9  -6   -0.16    2.08   0
  -5  10  -6   73.32    2.42   0
  -4   2 -10  157.26    2.54   0
  -4   2  -9  127.57    1.99   0
  -4   2  -8   79.85    1.62   0
  -4   2  -7    6.78    1.29   0
  -4   3  -5   64.75    1.74   0
  -4   4  -4   14.28    1.00   0
  -4   6  -3   25.24    1.19   0
  -4   9  -2  219.37    2.70   0
  -4  12  -3    0.00    1.61   0
  -3   0 -11   33.74    1.57   0
  -3   0  -6   -0.15    1.14   0
  -3   1  -4  422.01    3.53   0
  -3   2  -3  439.78    3.56   0
  -3   3  -2  269.43    2.91   0
  -3   5  -1   92.82    1.84   0
  -3   9   0   87.65    2.09   0
  -3  13  -1    0.35    2.22   0
  -2  -2 -10   20.11    1.66   0
  -2  -2  -9   16.39    1.18   0
  -2  -2  -8  644.85    4.48   0
  -2   0  -3    0.51    0.85   0
  -2   2  -1  396.21    4.15   0
  -2   6   1    9.83    1.47   0
  -1  -3 -11  109.10    2.30   0
  -1   3   1 3512.46   18.46   0
  -1  12   2   14.44    1.95   0
   1  -5 -10  314.17    5.35   0
   1  -5  -8    1.03    1.62   0
   2   1   2  282.05    3.72   0
   2   3   3    3.23    1.21   0
   2  11   4  116.64    3.63   0
   3  -3  -1 1932.18    8.58   0
   3  -2   0 2339.46    9.03   0
   3  -1   1    1.10    0.77   0
   3   5   4 1012.69    6.11   0
   4   2   3  315.36    2.95   0
   4   5   4  433.21    3.82   0
   5  -6  -7  361.24    4.57   0
   5  -5  -4   86.60    2.09   0
   5  -4  -2   49.27    1.49   0
   5   2   3 1570.03    6.10   0
   5   5   4   51.92    1.70   0
   6  -6  -7   69.28    2.09   0
   6  -5  -4  228.96    2.78   0
   6  -3  -1   26.39    1.14   0
   6  -2   0  132.87    2.12   0
   6  -1   1   32.96    1.25   0
   6   5   4    2.02    1.09   0
   6   6   4   28.23    1.76   0
   7  -6  -8    9.48    1.88   0
   7   1   2  212.38    2.27   0
   7   3   3  393.34    3.01   0
   7   7   4   17.51    1.56   0
   7   8   4    9.17    2.06   0
   8  -5  -6    0.68    2.33   0
   8  -3  -2  198.14    2.35   0
   8  -2  -1  173.34    2.38   0
   8  -1   0  127.84    2.10   0
   8   0   1    1.12    1.14   0
   8   2   2  284.36    2.57   0
   8   4   3   -0.02    1.38   0
   9  -3  -3    6.11    1.63   0
   9   0   0    2.12    1.97   0
   9   1   1   84.83    1.89   0
   9   3   2    4.95    1.65   0
  -5   5  -9   43.85    1.77   0
  -5   5  -8   12.68    1.80   0
  -5   5  -7    2.23    1.48   0
  -5   6  -7    7.43    1.26   0
  -5   6  -6   23.77    1.66   0
  -5   7  -6    1.78    1.31   0
  -5   8  -5   35.66    1.92   0
  -5   9  -5   24.55    1.55   0
  -5  10  -5   12.73    2.20   0
  -4   2 -11    5.91    1.60   0
  -4   2  -6  125.83    1.83   0
  -4   5  -3  304.22    2.75   0
  -4   7  -2  157.96    2.13   0
  -4   8  -2    1.43    0.98   0
  -4  10  -2   68.95    1.72   0
  -4  11  -2  188.62    2.82   0
  -3   0 -12    0.06    1.62   0
  -3   7   0  116.33    2.20   0
  -3   8   0   31.46    1.38   0
  -3  10   0  226.99    2.91   0
  -3  11   0   94.18    2.28   0
  -2  -2 -11    1.51    1.31   0
  -2  -2  -7  305.70    3.23   0
  -2  -1  -4  336.30    3.62   0
  -2  12   1    1.07    1.26   0
  -1  -3 -12    1.39    1.49   0
  -1  -3  -6    1.44    0.81   0
   0  -4 -12    7.70    2.15   0
   1  -5 -11   -0.05    2.25   0
   1   2   2 1605.61   11.19   0
   2   7   4   53.14    1.91   0
   2  10   4   49.98    2.53   0
   3   6   4  246.09    3.37   0
   3  12   4    1.74    2.15   0
   4  -3  -1  149.93    2.28   0
   4  -2   0    5.79    1.09   0
   4  -1   1   72.54    1.60   0
   5  -3  -1   34.53    1.20   0
   5  -2   0  133.95    1.90   0
   5  -1   1  170.50    2.15   0
   5   6   4   24.83    1.54   0
   6  -6  -8    2.06    1.89   0
   6   1   2   34.02    1.48   0
   6   3   3  133.39    1.92   0
   6   7   4   16.14    1.63   0
   7  -5  -5  125.36    2.23   0
   7  -4  -3  332.80    3.02   0
   7   0   1  802.12    4.25   0
   7   4   3    0.73    1.43   0
   8  -4  -4  174.98    2.42   0
   8   5   3   73.95    1.90   0
   8   6   3   -0.89    2.13   0
   9  -2  -2    0.61    1.45   0
   9  -1  -1   30.68    1.62   0
   9   2   1   71.02    1.89   0
   9   4   2   17.70    1.75   0
  -5   4 -10    1.50    2.35   0
  -5   4  -9   55.17    1.75   0
  -5   4  -8   10.34    1.38   0
  -5   5  -6   10.63    1.12   0
  -5   6  -5  133.72    1.88   0
  -5   7  -5    2.22    1.15   0
  -5   8  -4  101.01    2.11   0
  -5   9  -4   17.81    1.84   0
  -5  10  -4   86.54    2.36   0
  -4   1 -10    0.14    1.28   0
  -4   1  -9   76.71    1.73   0
  -4   1  -8   78.79    1.65   0
  -4   1  -7  479.58    3.50   0
  -4   2  -5   80.62    1.73   0
  -4   3  -4  572.43    3.65   0
  -4   4  -3   47.74    1.35   0
  -4   6  -2   29.94    1.25   0
  -4  12  -2   15.82    1.70   0
  -3  -1 -10   70.93    2.01   0
  -3  -1  -9  168.05    2.28   0
  -3  -1  -8   41.72    1.66   0
  -3   0  -5  293.17    2.89   0
  -3   4  -1  311.29    3.17   0
  -3   6   0  104.82    2.14   0
  -3  12   0   21.39    1.88   0
  -2  -2 -12   66.85    2.03   0
  -2   3   0  466.63    4.72   0
  -2  13   1   15.25    2.00   0
  -1   0  -1 7509.90   24.07   0
   0  -4  -6    9.57    1.41   0
   2   8   4   95.47    2.68   0
   2   9   4  105.96    2.99   0
   3   1   2   80.87    1.89   0
   3   3   3  821.20    5.30   0
   4  -6 -11    0.56    3.29   0
   4  -6  -8  213.55    4.17   0
   4   6   4    1.29    0.87   0
   4  12   4   20.36    1.94   0
   5  -6  -8   -0.13    1.69   0
   5   1   2  618.69    3.93   0
   5   3   3  552.04    3.83   0
   5   7   4   14.29    1.60   0
   5  11   4   38.29    2.56   0
   6  -6  -9    5.71    1.81   0
   6  -5  -5  251.68    3.12   0
   6  -4  -3  110.04    1.96   0
   6   8   4    8.35    1.38   0
   6   9   4   76.26    2.04   0
   6  10   4    6.53    1.78   0
   7  -5  -6    0.14    1.84   0
   7  -3  -2   15.23    1.15   0
   7  -2  -1    1.68    0.98   0
   7  -1   0  103.91    1.69   0
   7   2   2   39.18    1.33   0
   7   5   3  198.78    2.60   0
   8  -3  -3    4.82    1.62   0
   8   0   0  451.65    3.32   0
   8   1   1  680.91    3.80   0
   8   3   2   30.08    1.49   0
   9  -3  -4   56.05    1.97   0
   9   1   0   22.14    1.58   0
   9   3   1   91.24    2.39   0
  -5   3 -10    8.24    1.98   0
  -5   3  -9   62.79    2.11   0
  -5   3  -8   79.63    1.94   0
  -5   4  -7  278.27    2.56   0
  -5   4  -6  337.67    2.75   0
  -5   5  -5   19.08    1.12   0
  -5   6  -4   23.81    1.52   0
  -5   7  -4   13.18    1.16   0
  -5  11  -4   38.66    1.93   0
  -4   1 -11    9.56    1.60   0
  -4   1  -6  597.13    3.88   0
  -4   5  -2  276.98    2.70   0
  -4   8  -1  161.63    2.46   0
  -4   9  -1   49.65    1.78   0
  -4  10  -1   60.15    2.01   0
  -3  -1 -12  206.75    3.03   0
  -3  -1 -11  135.79    2.27   0
  -3  -1  -7   43.98    1.34   0
  -3   1  -3    5.08    0.79   0
  -3   2  -2  578.48    4.21   0
  -2   5   1 1512.17    8.71   0
  -1  -1  -2  466.47    5.79   0
  -1  13   2    2.63    2.04   0
   1  -5 -12    4.52    2.12   0
   3  -5  -5   66.86    2.28   0
   3   7   4  837.91    5.85   0
   3  11   4    4.41    1.70   0
   4  -6 -10   30.90    2.95   0
   4  -6  -9    3.84    1.96   0
   4   1   2   17.65    1.09   0
   4   3   3  605.06    4.17   0
   4   7   4  202.05    2.68   0
   4  11   4    0.26    1.81   0
   5  -6 -10   47.83    2.93   0
   5  -6  -9    7.73    2.01   0
   5  -4  -3  925.92    5.35   0
   5   8   4  105.90    2.05   0
   5   9   4   17.13    1.41   0
   5  10   4   91.03    2.17   0
   6  -3  -2  583.98    4.00   0
   6   0   1    0.27    0.90   0
   6   2   2  340.04    2.98   0
   6   4   3   17.04    1.14   0
   7  -4  -4   -0.07    1.20   0
   7   1   1    3.64    1.33   0
   7   6   3    3.36    1.60   0
   8  -4  -5   91.42    2.09   0
   8  -2  -2   34.41    1.40   0
   8  -1  -1   38.31    1.42   0
   8   2   1   63.87    1.84   0
   8   4   2    1.78    1.33   0
   9  -3  -5    2.97    2.47   0
   9  -2  -3   46.37    1.78   0
   9  -1  -2  137.77    2.17   0
   9   0  -1   66.35    1.78   0
  -5   3  -7   -0.85    1.12   0
  -5   4  -5   43.38    1.63   0
  -5   5  -4   49.05    1.66   0
  -5   7  -3  447.96    3.47   0
  -5   8  -3   25.10    1.31   0
  -5   9  -3  225.56    2.51   0
  -5  10  -3   50.50    1.71   0
  -5  11  -3  108.96    2.68   0
  -4   0 -10    1.48    1.80   0
  -4   0  -9    0.50    1.54   0
  -4   0  -8  875.98    4.76   0
  -4   2  -4  196.02    2.29   0
  -4   3  -3  618.56    3.90   0
  -4   7  -1  736.44    4.50   0
  -4  11  -1  177.34    2.56   0
  -4  12  -1    5.47    1.86   0
  -3  -1  -6  637.35    4.27   0
  -3   0  -4    0.44    0.75   0
  -3   3  -1 1221.72    6.30   0
  -3   5   0  261.91    3.16   0
  -3  13   0   34.20    1.92   0
  -2  -3 -10   29.82    1.71   0
  -2  -3  -9  458.87    4.20   0
  -2  -2  -5  158.88    2.64   0
  -1  -3  -5   87.41    2.41   0
  -1   5   2  303.86    5.96   0
   2   0   1    1.10    1.12   0
   2   4   3 1600.29    8.65   0
   3   8   4  501.35    4.67   0
   3   9   4  156.05    2.91   0
   3  10   4    1.96    1.17   0
   4  -5  -5   44.66    1.66   0
   4  -4  -3  395.50    3.85   0
   4   8   4   31.01    1.40   0
   4   9   4    6.22    1.22   0
   4  10   4   92.27    2.19   0
   5   0   1    2.41    0.87   0
   5   4   3  297.79    2.81   0
   6  -5  -6  138.19    2.58   0
   6  -2  -1   60.43    1.43   0
   6  -1   0   -0.03    0.90   0
   6   5   3  131.30    1.96   0
   7  -5  -7   24.30    1.73   0
   7  -3  -3    5.15    1.41   0
   7   0   0    1.02    1.29   0
   7   3   2  616.90    3.76   0
   7   7   3   57.23    1.75   0
   7   8   3    0.29    2.14   0
   8  -4  -6    8.06    2.07   0
   8  -3  -4  281.30    2.97   0
   8   1   0  133.97    2.20   0
   8   5   2   47.15    1.67   0
   9  -2  -4   42.79    2.37   0
   9   2   0   16.35    1.55   0
   9   4   1   45.22    1.88   0
  -6   6  -8    0.86    1.71   0
  -6   6  -7   -0.01    2.03   0
  -6   7  -7   56.35    1.89   0
  -6   7  -6   34.88    2.10   0
  -6   8  -6   84.61    2.01   0
  -5   2 -10   25.89    1.70   0
  -5   2  -9   -0.67    1.33   0
  -5   2  -8   65.07    1.52   0
  -5   2  -7  552.50    3.68   0
  -5   3  -6   65.02    1.49   0
  -5   6  -3   24.69    1.16   0
  -4   0 -11    0.16    1.64   0
  -4   0  -7    0.97    0.94   0
  -4   1  -5   39.53    1.27   0
  -4   4  -2  210.86    2.41   0
  -4   6  -1  202.73    2.45   0
  -3  -2 -10   22.54    1.79   0
  -3  -2  -9    4.61    1.50   0
  -2  -3 -11   58.18    1.89   0
  -2  -3  -8  218.58    2.84   0
  -2   0  -2 2761.15   10.74   0
  -2   1  -1 2642.92   10.83   0
  -1  -4 -11   -0.41    1.81   0
  -1  -4 -10  424.81    4.38   0
  -1  -4  -9  383.88    4.16   0
  -1  -4  -8    1.16    1.13   0
  -1   1   0  993.90    9.51   0
   0  -2  -2  212.57    8.03   0
   1  -5  -7  134.11    7.35   0
   1   5   3  628.70    7.29   0
   2  -5  -6   13.86    1.98   0
   3   0   1    4.50    0.89   0
   3   4   3  489.52    4.21   0
   4   0   1    1.07    0.73   0
   4   4   3   48.18    1.40   0
   5  -3  -2  736.56    4.53   0
   5  -2  -1    2.40    0.81   0
   5  -1   0  694.37    4.18   0
   5   2   2   18.14    1.06   0
   6  -4  -4  181.71    2.39   0
   6   1   1   30.95    1.38   0
   6   3   2    3.29    1.27   0
   6   6   3   27.91    1.29   0
   7  -4  -5   58.20    1.69   0
   7  -2  -2    0.19    0.91   0
   7  -1  -1    6.16    0.97   0
   7   2   1  524.15    3.56   0
   7   4   2  327.01    2.79   0
   8  -2  -3   50.88    1.55   0
   8  -1  -2   84.05    2.00   0
   8   0  -1   -0.93    1.16   0
   8   3   1  237.33    2.43   0
   8   6   2   20.85    1.65   0
   8   7   2   32.04    2.42   0
   9  -1  -3    0.83    1.52   0
   9   0  -2   -0.06    1.40   0
   9   1  -1   34.57    1.62   0
   9   3   0  140.65    2.25   0
  -6   4  -9   74.42    2.40   0
  -6   5  -8    0.43    1.57   0
  -6   5  -7   42.67    1.62   0
  -6   6  -6  223.16    2.37   0
  -6   7  -5  140.00    2.42   0
  -6   8  -5   -0.83    1.43   0
  -6   9  -5   28.15    1.84   0
  -5   2  -6   91.92    1.95   0
  -5   3  -5  144.93    1.93   0
  -5   4  -4  129.45    1.89   0
  -5   5  -3   26.46    1.41   0
  -5   8  -2    0.50    1.08   0
  -5   9  -2  109.30    1.91   0
  -5  10  -2   52.11    1.68   0
  -5  11  -2   64.78    2.41   0
  -4   0  -6   16.87    1.10   0
  -4   2  -3  311.29    3.00   0
  -4   5  -1  510.57    3.83   0
  -3  -2 -12   43.47    2.36   0
  -3  -2 -11   39.01    1.77   0
  -3  -2  -8    5.60    1.04   0
  -3  -1  -5   65.10    1.54   0
  -3   8   1   86.87    2.01   0
  -3   9   1   32.89    1.46   0
  -3  10   1   -0.27    1.05   0
  -3  11   1    3.39    1.61   0
  -2  -3 -12   -0.37    1.62   0
  -2  -3  -7   37.14    1.68   0
  -2  -1  -3  243.85    3.25   0
  -2   8   2  681.23    6.49   0
  -2   9   2  253.44    4.00   0
  -2  10   2    2.56    1.45   0
  -1  -4 -12    3.30    2.21   0
  -1  -2  -3 2333.63   12.38   0
   2  -2  -1  820.43    6.74   0
   2  -1   0   50.27    1.89   0
   2   2   2  276.46    3.59   0
   3  -3  -2  900.85    6.15   0
   3  -1   0  188.97    2.78   0
   4  -3  -2  729.76    4.83   0
   4  -2  -1  180.58    2.55   0
   4  -1   0    9.31    0.90   0
   4   2   2  965.81    5.19   0
   5  -4  -4  276.93    3.25   0
   5   5   3   22.48    1.17   0
   6  -3  -3  768.51    4.65   0
   6   0   0  584.63    3.81   0
   6   7   3  386.99    3.25   0
   6   8   3  249.12    3.01   0
   7   5   2  103.32    1.78   0
   8  -4  -7    0.10    1.82   0
   8  -3  -5    2.65    1.40   0
   8   2   0  292.75    2.73   0
   8   4   1   21.09    1.36   0
   9  -2  -5    9.62    2.19   0
   9   2  -1   45.57    2.01   0
   9   4   0   31.04    2.19   0
  -6   4  -8    2.67    1.50   0
  -6   4  -7   96.22    1.79   0
  -6   5  -6  187.72    2.25   0
  -6   6  -5   76.88    1.71   0
  -6   8  -4   10.54    1.86   0
  -6   9  -4   72.09    1.95   0
  -6  10  -4    4.26    1.75   0
  -5   1 -10    0.40    1.55   0
  -5   1  -9    8.63    1.36   0
  -5   1  -8  618.79    3.84   0
  -5   1  -7  171.84    2.37   0
  -5   3  -4   66.52    1.71   0
  -5   6  -2   78.46    1.81   0
  -5   7  -2  134.24    1.99   0
  -4  -1 -11   11.94    2.18   0
  -4  -1 -10   -0.32    1.30   0
  -4  -1  -9   85.20    1.78   0
  -4  -1  -8   79.91    1.96   0
  -4   1  -4  417.40    3.24   0
  -4   3  -2   82.24    1.63   0
  -4   8   0   44.45    1.48   0
  -4   9   0  143.93    2.29   0
  -4  10   0    1.05    1.13   0
  -4  11   0   77.30    2.29   0
  -3  -2  -7    0.07    0.92   0
  -3   0  -3  189.14    2.43   0
  -3   1  -2   81.61    1.74   0
  -3   4   0  601.16    4.59   0
  -3   7   1   31.19    1.33   0
  -3  12   1   38.14    2.19   0
  -2   2   0  457.88    4.88   0
  -2   4   1  252.07    3.74   0
  -2  11   2  275.73    4.35   0
  -1  -4  -7  297.64    4.13   0
  -1  14   2   46.54    3.14   0
   0  -5 -10   55.59    2.68   0
   3  -2  -1 1840.57    8.32   0
   3   2   2  568.00    4.36   0
   4  -5  -6    0.92    1.29   0
   4   5   3  297.44    3.05   0
   5   1   1  168.64    2.12   0
   5   3   2  569.93    3.73   0
   5   6   3   22.66    1.25   0
   6  -5  -8   18.53    2.09   0
   6  -4  -5  127.29    2.14   0
   6  -2  -2   83.20    1.66   0
   6  -1  -1  354.94    3.00   0
   6   2   1   -0.30    1.20   0
   6   4   2  320.03    2.80   0
   6   9   3   82.31    2.03   0
   6  10   3  105.64    2.27   0
   7  -4  -6   12.10    1.41   0
   7  -3  -4  220.14    2.52   0
   7  -2  -3  671.19    4.16   0
   7   1   0  106.44    1.72   0
   7   3   1  558.05    3.53   0
   7   6   2   12.39    1.30   0
   8  -2  -4   74.11    1.83   0
   8   1  -1   39.40    1.41   0
   8   5   1   59.68    1.66   0
   9  -1  -4    0.20    1.58   0
   9   0  -3    3.65    1.55   0
   9   1  -2  129.17    2.05   0
   9   5   0  234.13    3.02   0
  -6   3  -9    1.43    1.65   0
  -6   3  -8    0.03    1.39   0
  -6   3  -7  284.89    2.85   0
  -6   4  -6  259.29    2.51   0
  -6   5  -5    0.20    1.14   0
  -6   6  -4   24.85    1.68   0
  -6   7  -4   14.53    1.34   0
  -5   1  -6  787.81    4.46   0
  -5   2  -5   28.97    1.11   0
  -5   4  -3  300.51    2.67   0
  -5   9  -1   25.90    1.65   0
  -4  -1  -7  491.33    3.55   0
  -4   0  -5   -0.86    0.95   0
  -4   4  -1   90.85    1.65   0
  -4   7   0  191.03    2.50   0
  -4  12   0   25.60    2.18   0
  -3  -2  -6   39.45    1.58   0
  -3  -1  -4  434.43    3.76   0
  -3   2  -1 1719.70    7.48   0
  -3   6   1   95.45    2.19   0
  -2  -3  -6  548.28    4.71   0
  -2  -2  -4 2345.61    9.66   0
  -2   7   2  297.80    4.39   0
  -2  12   2   -0.01    1.63   0
   0  -5 -11   64.57    2.78   0
   0  -5  -9  268.53    4.76   0
   0   7   3  148.51    7.30   0
   1  13   3   49.65    3.86   0
   2  -4  -4   39.53    2.08   0
   2   5   3 1547.41    8.61   0
   3  -5  -6   58.15    2.27   0
   3   5   3    9.62    1.01   0
   4   1   1   68.21    1.71   0
   4   6   3   25.54    1.45   0
   5  -5  -7   93.30    2.41   0
   5  -3  -3  224.03    2.75   0
   5   0   0   -0.62    1.06   0
   5   7   3  448.22    3.62   0
   5   8   3   24.64    1.69   0
   5  11   3  106.97    2.76   0
   6  -5  -9    5.05    2.23   0
   6   5   2    6.36    1.35   0
   7  -4  -7   18.46    2.01   0
   7  -1  -2  365.36    2.95   0
   7   0  -1   67.85    1.46   0
   7   7   2    5.93    1.34   0
   7   8   2    0.21    1.96   0
   8  -3  -6   17.20    1.60   0
   8  -1  -3  160.85    2.14   0
   8   0  -2    1.25    1.14   0
   8   3   0  170.89    2.15   0
   8   6   1    0.00    1.47   0
   9   3  -1   73.47    1.87   0
  -6   2  -9    0.21    1.53   0
  -6   2  -8    0.55    1.70   0
  -6   3  -6  259.29    2.75   0
  -6   4  -5  319.80    2.69   0
  -6   5  -4    1.55    1.46   0
  -6   7  -3  422.38    3.33   0
  -6   8  -3  252.82    2.61   0
  -6   9  -3   77.18    1.90   0
  -6  10  -3  106.90    2.20   0
  -5   0 -10    0.09    1.52   0
  -5   0  -9    9.62    1.34   0
  -5   0  -8    0.33    1.16   0
  -5   2  -4   38.47    1.59   0
  -5   3  -3  524.45    3.67   0
  -5   5  -2  242.91    2.47   0
  -5   7  -1   62.19    1.80   0
  -5   8  -1  138.50    2.02   0
  -5  10  -1   18.02    1.43   0
  -5  11  -1    2.66    1.43   0
  -5  12  -1    0.06    2.11   0
  -4  -1  -6  594.80    4.06   0
  -4   1  -3 3187.22    8.73   0
  -4   2  -2  980.89    5.18   0
  -4   6   0  451.43    3.69   0
  -4  13   0    0.76    2.44   0
  -3  -3 -11   46.02    2.14   0
  -3  -3 -10   31.39    1.92   0
  -3  -3  -9    1.50    1.38   0
  -3  13   1   13.19    1.78   0
   0  -5 -12    1.06    2.27   0
   1   1   1  204.48    4.33   0
   3  -4  -4   90.89    2.24   0
   3  13   3    0.60    2.28   0
   4   3   2   79.92    1.66   0
   4  12   3    0.07    2.17   0
   5  -4  -5   28.31    1.54   0
   5  -2  -2   79.95    1.60   0
   5  -1  -1   59.38    1.40   0
   5   4   2  553.80    3.71   0
   5   9   3  209.72    2.68   0
   5  10   3   51.98    1.82   0
   6  -5 -10    0.24    2.54   0
   6  -4  -6  139.31    2.58   0
   6  -3  -4   49.92    1.45   0
   6   1   0    0.62    0.90   0
   6   3   1  876.03    4.61   0
   7  -3  -5  277.34    2.86   0
   7   2   0   20.23    1.11   0
   7   4   1  106.64    1.80   0
   7   9   2   58.72    1.98   0
   8  -3  -7   23.75    1.82   0
   8  -2  -5   88.58    1.89   0
   8   2  -1  186.43    2.12   0
   8   4   0  157.85    2.14   0
   8   7   1   21.43    1.68   0
   9  -1  -5   12.50    1.69   0
   9   0  -4    0.00    1.55   0
   9   1  -3    0.85    1.45   0
   9   2  -2   -1.26    1.50   0
   9   4  -1   56.37    1.85   0
  -7   5  -7   -0.34    2.24   0
  -7   6  -6   -1.12    2.18   0
  -6   2  -7   43.76    1.50   0
  -6   3  -5    1.38    1.40   0
  -6   4  -4    7.19    1.45   0
  -6   6  -3   28.57    1.26   0
  -5   0  -7  822.08    4.43   0
  -5   1  -5   50.91    1.30   0
  -5   4  -2  525.47    3.56   0
  -5   6  -1   34.21    1.52   0
  -4  -2 -11    4.63    2.16   0
  -4  -2 -10  156.25    2.39   0
  -4  -2  -9  134.81    2.12   0
  -4   0  -4  311.88    2.90   0
  -4   3  -1    3.70    1.01   0
  -4   5   0  143.32    2.29   0
  -3  -3 -12   16.44    2.52   0
  -3  -3  -8  284.07    3.22   0
  -3  -2  -5  460.03    3.92   0
  -3   3   0  240.05    3.01   0
  -2  -4 -12    0.24    2.11   0
  -2  -4 -11   17.22    2.11   0
  -2  -4 -10    0.50    1.22   0
  -2  -4  -9   -0.18    1.39   0
  -1  -3  -4  489.51    5.67   0
   0  -5  -8   31.68    2.27   0
   0  -4  -5 1548.27   14.11   0
   1   6   3   14.16    1.50   0
   2  13   3    1.64    2.17   0
   3   1   1    0.11    0.78   0
   3   3   2  271.30    3.14   0
   3   6   3 1173.27    6.55   0
   4  -5  -7  720.72    6.27   0
   4  -3  -3  517.19    4.33   0
   4   0   0 1086.16    5.52   0
   4   7   3    4.06    0.93   0
   4   8   3   46.45    1.79   0
   4  11   3   79.37    2.55   0
   5  -5  -8  140.10    2.69   0
   5   2   1   77.23    1.56   0
   6  -2  -3  194.70    2.29   0
   6  -1  -2  130.39    2.12   0
   6   0  -1   -0.46    0.89   0
   6   6   2  905.39    4.66   0
   6   7   2   -0.54    1.58   0
   7  -4  -8   16.39    1.71   0
   7  -2  -4   83.27    1.74   0
   7  -1  -3   14.42    1.48   0
   7   0  -2   -0.61    1.33   0
   7   1  -1    4.99    1.02   0
   7   3   0  114.65    2.01   0
   7   5   1    7.00    1.18   0
   8  -1  -4   69.00    1.73   0
   8   0  -3    0.68    1.11   0
   8   1  -2   74.82    1.61   0
   8   5   0  241.97    2.66   0
   9   3  -2   11.94    1.62   0
   9   5  -1   46.04    1.93   0
  -7   4  -7  141.67    2.57   0
  -7   5  -6  374.72    3.00   0
  -7   6  -5   70.25    2.25   0
  -7   7  -5   66.97    1.93   0
  -6   1  -9   -0.15    1.55   0
  -6   1  -8    4.50    1.82   0
  -6   2  -6  235.95    2.41   0
  -6   5  -3  120.12    1.83   0
  -6   7  -2    1.20    1.57   0
  -6   8  -2  290.00    2.81   0
  -6   9  -2    9.97    1.41   0
  -6  10  -2   25.89    1.77   0
  -5  -1 -10    0.53    2.08   0
  -5  -1  -9    5.44    1.81   0
  -5   0  -6   -0.61    1.01   0
  -5   2  -3 1606.10    6.13   0
  -4  -2  -8   77.84    1.69   0
  -4  -2  -7    8.14    1.33   0
  -4  -1  -5   39.59    1.26   0
  -4   9   1   21.82    1.54   0
  -4  10   1  215.03    3.05   0
  -3  -3  -7  198.38    2.77   0
  -3   0  -2   -1.45    1.09   0
  -3   5   1  235.61    3.09   0
  -2  -4  -8   97.20    2.33   0
  -2  -3  -5   22.71    1.44   0
  -2   6   2  613.43    6.14   0
  -2  13   2   16.23    2.25   0
  -1  -4  -6  605.20    5.88   0
   1   3   2 2352.38   13.54   0
   2   1   1 2592.77   10.90   0
   2   3   2  174.71    3.01   0
   2   6   3   98.11    2.32   0
   3   7   3   58.37    2.00   0
   3  12   3    0.36    1.94   0
   4  -2  -2 1888.25    7.73   0
   4  -1  -1  774.58    4.84   0
   4   4   2  215.03    2.63   0
   4   9   3   11.77    1.19   0
   4  10   3    7.47    1.28   0
   5  -5  -9    1.79    1.90   0
   5   1   0  712.35    4.28   0
   5   5   2  244.75    2.58   0
   6  -4  -7  233.07    3.08   0
   6  -3  -5    0.17    1.37   0
   6   2   0  147.05    2.19   0
   6   4   1   88.07    1.83   0
   6   8   2  297.83    2.91   0
   6   9   2   10.26    1.74   0
   6  10   2   28.31    2.08   0
   7  -4  -9   59.74    2.28   0
   7  -3  -6    0.98    1.24   0
   7   6   1   60.41    1.60   0
   7   7   1   18.18    1.82   0
   8  -2  -6   75.32    1.90   0
   8   3  -1   53.12    1.51   0
   8   6   0    1.94    1.46   0
   9   0  -5   65.92    1.94   0
   9   1  -4    0.69    1.47   0
   9   2  -3   52.13    1.73   0
   9   4  -2    0.06    1.94   0
  -7   3  -8    1.51    1.76   0
  -7   4  -6   33.03    2.09   0
  -7   5  -5   13.70    1.50   0
  -7   7  -4   20.40    1.58   0
  -7   8  -4    4.01    1.72   0
  -6   1  -7  256.34    2.53   0
  -6   2  -5    4.98    1.08   0
  -6   3  -4  225.36    2.31   0
  -6   4  -3   14.74    1.47   0
  -6   6  -2  940.97    4.76   0
  -5  -1  -8  626.97    4.03   0
  -5  -1  -7  162.28    2.37   0
  -5   0  -5    6.74    1.24   0
  -5   1  -4   82.27    1.58   0
  -5   3  -2  616.93    3.80   0
  -5   5  -1  947.23    4.81   0
  -5   8   0  148.34    2.41   0
  -5   9   0   10.05    1.26   0
  -5  10   0   30.70    1.58   0
  -5  11   0   -0.14    1.93   0
  -4   0  -3   -0.20    1.06   0
  -4   1  -2   23.29    1.28   0
  -4   8   1  426.12    3.82   0
  -4  11   1   46.05    1.77   0
  -3  -1  -3    5.12    0.85   0
  -3   1  -1    1.42    0.85   0
  -2  -1  -2  285.39    3.64   0
  -2   0  -1    2.37    1.13   0
  -2   3   1 1299.31    8.43   0
  -1   2   1  152.79    4.47   0
   2  12   3   29.80    2.43   0
   3  -5  -7  544.55    6.38   0
   3   0   0    0.75    1.12   0
   3   8   3  281.98    3.51   0
   3  11   3  169.67    3.15   0
   4   2   1   66.36    1.49   0
   5  -5 -10    9.88    2.31   0
   5  -3  -4   -0.32    0.90   0
   5   3   1  921.17    4.75   0
   5   6   2   79.96    1.62   0
   7  -3  -7   44.21    1.97   0
   7  -2  -5  114.90    1.90   0
   7   2  -1    0.73    0.97   0
   7   4   0   56.83    1.44   0
   7   8   1   68.72    1.86   0
   7   9   1  171.48    2.69   0
   8  -2  -7    0.72    1.99   0
   8  -1  -5    0.25    1.27   0
   8   0  -4  125.83    2.22   0
   8   1  -3  159.28    2.09   0
   8   2  -2   28.14    1.37   0
   8   4  -1   32.06    1.44   0
   8   7   0   12.92    1.59   0
   8   8   0   19.80    2.21   0
   9   0  -6    0.26    2.36   0
   9   3  -3    5.30    1.64   0
   9   5  -2   21.77    2.16   0
  -7   3  -7   19.70    1.68   0
  -7   3  -6  283.84    2.85   0
  -7   4  -5   99.69    2.17   0
  -7   6  -4    5.11    1.39   0
  -7   8  -3   -1.99    1.61   0
  -7   9  -3    6.69    1.80   0
  -6   0  -9    0.41    1.54   0
  -6   0  -8   15.40    1.88   0
  -6   1  -6    5.92    1.10   0
  -6   5  -2    3.10    1.41   0
  -6   8  -1    8.88    1.54   0
  -6   9  -1  197.79    2.77   0
  -6  10  -1  162.09    2.80   0
  -6  11  -1    0.31    2.08   0
  -5   4  -1   93.14    1.87   0
  -5   7   0   52.01    1.52   0
  -5  12   0    7.30    1.77   0
  -4  -3 -10    6.05    1.78   0
  -4  -2  -6  119.55    1.92   0
  -4  -1  -4  432.34    3.51   0
  -4   2  -1   64.77    1.67   0
  -4   4   0    1.26    0.80   0
  -4   7   1   26.69    1.27   0
  -4  12   1   94.14    2.35   0
  -3  -3  -6  227.46    2.90   0
  -3  -2  -4  299.37    3.27   0
  -3   8   2  144.74    2.84   0
  -3   9   2  115.76    2.47   0
  -3  10   2  539.45    5.17   0
  -3  11   2   91.76    2.65   0
  -2  -4  -7  247.02    3.22   0
  -2  -2  -3  391.31    4.11   0
  -1  -5 -12   -0.19    2.17   0
  -1  -5 -11   44.31    2.48   0
  -1  -5 -10    0.95    1.68   0
  -1  -5  -9   71.49    2.41   0
   1  12   3  132.55    4.16   0
   2   7   3 1795.15    9.50   0
   3  -2  -2   11.71    1.31   0
   3  -1  -1  347.99    3.75   0
   3   4   2   41.24    1.58   0
   3   9   3  440.11    4.22   0
   3  10   3  184.81    2.89   0
   4  -5  -8  126.38    2.74   0
   4   5   2  287.72    3.03   0
   5  -5 -11   70.98    2.69   0
   5  -2  -3   68.93    1.61   0
   5  -1  -2   66.37    1.48   0
   5   0  -1  386.60    3.17   0
   5   7   2  135.74    2.06   0
   6  -2  -4  317.99    2.95   0
   6  -1  -3  590.48    3.93   0
   6   0  -2    0.20    1.23   0
   6   1  -1  349.06    2.90   0
   6   3   0  339.18    2.92   0
   6   5   1  468.89    3.30   0
   7  -1  -4  872.17    4.63   0
   7   0  -3 1137.48    4.95   0
   7   1  -2  337.72    2.80   0
   7   5   0    0.89    1.34   0
   8  -2  -8    0.39    2.34   0
   8  -1  -6   11.08    2.01   0
   8   3  -2  212.94    2.31   0
   8   5  -1    8.38    1.35   0
   9   1  -5   13.79    1.69   0
   9   2  -4   41.90    1.79   0
   9   4  -3    7.50    2.26   0
  -7   2  -8   -0.33    1.70   0
  -7   2  -7    0.29    1.51   0
  -7   5  -4    0.31    1.25   0
  -7   6  -3    1.13    1.78   0
  -7   7  -3   47.63    1.69   0
  -6   0  -7   -0.13    1.20   0
  -6   1  -5  165.23    2.03   0
  -6   2  -4    9.01    1.03   0
  -6   3  -3  130.08    1.88   0
  -6   7  -1  548.88    3.66   0
  -5  -2 -10   28.67    1.74   0
  -5  -2  -9    1.05    1.81   0
  -5  -1  -6  739.87    4.26   0
  -5   0  -4    1.04    1.19   0
  -5   1  -3   20.57    1.07   0
  -5   2  -2   18.67    1.05   0
  -5   6   0  110.00    1.87   0
  -4  -3 -11    3.66    1.69   0
  -4  -3  -9    0.42    1.22   0
  -4  -3  -8   85.78    2.00   0
  -4   6   1  333.59    3.25   0
  -3  -4 -11   -0.46    2.11   0
  -3  -4 -10    1.26    1.81   0
  -3  -4  -9   93.95    2.27   0
  -3   2   0 2286.50    9.01   0
  -3   4   1 1660.99    7.95   0
  -3  12   2   95.01    2.78   0
  -2   1   0   53.23    1.95   0
  -2   5   2    1.96    1.06   0
  -1   4   2 2461.60   18.86   0
  -1   9   3   49.11    4.11   0
  -1  10   3    9.70    3.10   0
   1   7   3  110.13    3.08   0
   2  -5  -7   18.64    2.08   0
   2  -3  -3  190.97    3.64   0
   2   0   0  497.86    5.01   0
   2   8   3  120.97    2.73   0
   2  11   3   22.62    1.88   0
   3  -4  -5   26.45    1.55   0
   3   2   1 1742.05    7.61   0
   4  -5  -9   22.18    1.99   0
   4  -3  -4 1235.24    6.70   0
   4   1   0    9.07    0.84   0
   5   2   0  135.20    2.05   0
   5   4   1   85.02    1.61   0
   5   8   2   -0.15    1.08   0
   5   9   2  112.90    1.98   0
   5  10   2   43.57    1.67   0
   5  11   2   64.86    2.04   0
   6  -3  -6   84.93    1.84   0
   6   6   1   21.60    1.20   0
   7  -3  -8  115.10    2.23   0
   7  -2  -6  116.58    2.00   0
   7   3  -1  194.10    2.14   0
   7   6   0   72.11    1.83   0
   8   0  -5   -0.30    1.27   0
   8   1  -4   77.80    2.09   0
   8   2  -3   49.28    1.52   0
   8   6  -1    8.00    1.48   0
   9   2  -5   10.65    2.36   0
   9   3  -4   61.49    1.86   0
  -7   1  -8  144.89    2.76   0
  -7   2  -6    1.34    1.33   0
  -7   3  -5    0.85    1.29   0
  -7   4  -4  159.65    2.10   0
  -7   5  -3  191.85    2.51   0
  -7   8  -2    1.00    1.95   0
  -7   9  -2   60.66    1.99   0
  -6  -1  -9    0.62    2.08   0
  -6   0  -6  195.74    2.21   0
  -6   4  -2  331.70    2.81   0
  -6   6  -1   17.16    1.20   0
  -5  -2  -8   69.98    1.68   0
  -5  -1  -5   52.07    1.60   0
  -5   3  -1  940.45    4.85   0
  -5   5   0   66.97    1.79   0
  -4  -2  -5   81.14    1.67   0
  -4   3   0    5.55    0.88   0
  -3  -4  -8   33.19    1.73   0
  -3   7   2   12.00    1.12   0
  -1  -5  -8    7.08    1.40   0
   1  -3  -3  229.91    6.49   0
   2   9   3    3.48    1.26   0
   2  10   3    0.65    1.28   0
   4   3   1    1.85    0.77   0
   4   6   2   29.13    1.20   0
   5  -3  -5  122.72    2.07   0
   6  -2  -5   92.17    2.01   0
   6   2  -1   61.25    1.41   0
   6   4   0    7.83    0.94   0
   6   7   1  565.54    3.67   0
   6   8   1    8.64    1.24   0
   6   9   1  196.33    2.70   0
   6  10   1  160.32    2.74   0
   6  11   1    0.36    1.68   0
   7  -3  -9   13.60    1.78   0
   7  -1  -5   84.45    1.93   0
   7   1  -3   16.73    1.47   0
   7   2  -2   -0.15    0.97   0
   7   4  -1   -2.51    1.05   0
   7   7   0   40.37    1.51   0
   7   8   0  218.79    2.83   0
   8  -1  -7   50.96    1.85   0
   8   4  -2   42.45    1.51   0
   8   7  -1   19.66    1.63   0
   8   8  -1    1.97    1.69   0
   9   4  -4    0.29    2.29   0
  -7   1  -7   26.76    1.61   0
  -7   2  -5    2.24    1.22   0
  -7   3  -4    2.33    1.12   0
  -7   4  -3    2.00    1.58   0
  -7   6  -2   11.55    1.76   0
  -7   7  -2    4.90    1.39   0
  -6  -1  -8    4.15    1.39   0
  -6  -1  -7  252.51    2.77   0
  -6   0  -5    0.65    1.37   0
  -6   1  -4   59.04    1.40   0
  -6   2  -3  140.46    1.87   0
  -6   3  -2    2.14    1.27   0
  -6   5  -1  468.45    3.33   0
  -6   9   0  182.58    2.73   0
  -6  10   0   17.58    2.10   0
  -5  -2  -7  555.40    3.75   0
  -5   8   1  406.51    3.81   0
  -5   9   1  210.01    2.92   0
  -5  10   1   45.21    2.10   0
  -5  11   1  273.97    3.53   0
  -4  -3  -7  201.97    2.45   0
  -4  -1  -3 3070.66    9.13   0
  -4   0  -2 2970.83    8.88   0
  -4   5   1   94.03    1.83   0
  -3  -3  -5  366.80    3.53   0
  -3   6   2   27.63    1.48   0
  -3  13   2   97.84    3.46   0
  -2  -5 -11  137.49    3.14   0
  -2  -5 -10   36.10    2.02   0
  -2  -4  -6  128.82    2.46   0
  -2  -3  -4  149.75    2.65   0
  -1  -4  -5  104.59    2.81   0
  -1  -1  -1  205.53    4.37   0
   0  -5  -7   41.56    2.70   0
   0  11   3   57.10    3.76   0
   1   0   0    0.62    0.52   0
   1   8   3  122.33    3.29   0
   1  11   3    2.72    1.62   0
   2  -1  -1 3341.52   13.19   0
   2   4   2  275.28    3.56   0
   3  -5  -8   37.50    2.11   0
   3   5   2  288.03    3.16   0
   4  -5 -11   91.64    3.25   0
   4  -5 -10   42.12    2.35   0
   4  -2  -3  590.42    4.41   0
   4  -1  -2  150.01    2.34   0
   4   0  -1    0.68    0.72   0
   4   7   2  157.05    2.26   0
   4  12   2   17.76    1.71   0
   5  -2  -4   20.26    1.35   0
   5   1  -1   57.96    1.38   0
   5   5   1  944.36    4.81   0
   6  -3  -7  439.07    3.76   0
   6  -1  -4   -0.38    1.26   0
   6   1  -2  130.53    1.90   0
   6   5   0    0.32    1.31   0
   7  -2  -7   44.84    1.64   0
   7   0  -4    0.48    1.02   0
   7   5  -1    3.48    1.45   0
   7   9   0    6.25    1.57   0
   8  -1  -8    0.00    1.72   0
   8   0  -6   68.81    1.82   0
   8   1  -5    0.54    1.63   0
   8   2  -4   85.65    1.74   0
   8   3  -3    5.23    1.23   0
   8   5  -2   23.41    1.46   0
   8   6  -2   20.76    2.05   0
   9   3  -5    2.77    1.71   0
  -8   3  -6   29.13    2.45   0
  -8   4  -5    1.03    2.15   0
  -8   5  -4    5.57    1.96   0
  -8   6  -4   86.75    2.12   0
  -7   0  -8   -1.12    1.69   0
  -7   1  -6   13.26    1.37   0
  -7   5  -2  101.79    2.06   0
  -7   9  -1  170.80    2.86   0
  -6   4  -1   97.63    1.86   0
  -6   7   0  162.46    2.47   0
  -6   8   0  283.80    2.88   0
  -6  11   0    3.88    1.75   0
  -5  -3 -10    7.98    2.24   0
  -5  -3  -9   60.91    2.10   0
  -5  -2  -6   88.25    1.72   0
  -5  -1  -4   83.85    1.79   0
  -5   0  -3  375.61    2.99   0
  -5   1  -2  600.48    3.75   0
  -5   4   0  616.80    3.96   0
  -5   7   1   36.52    1.73   0
  -5  12   1    1.46    2.34   0
  -4  -3  -6   86.71    1.92   0
  -4  -2  -4  192.33    2.46   0
  -4   1  -1   68.65    1.57   0
  -3  -4  -7  171.02    2.55   0
  -3  -2  -3  456.93    3.99   0
  -3  -1  -2   82.06    1.78   0
  -3   0  -1    5.53    0.91   0
  -3   3   1 2051.49    8.80   0
  -2  -5  -9   54.79    2.12   0
  -1  -2  -2 1586.62   11.08   0
   0  -3  -3  553.63   11.64   0
   0   8   3  721.58   11.37   0
   1   9   3  129.45    3.28   0
   1  10   3   35.98    2.08   0
   2   2   1  406.16    4.34   0
   3   1   0  185.54    2.71   0
   4   4   1   89.78    1.82   0
   4   8   2    0.15    0.97   0
   4   9   2  224.40    2.84   0
   4  10   2   75.79    2.04   0
   4  11   2  179.34    2.64   0
   5  -3  -6    8.39    1.37   0
   5  -1  -3    3.89    0.79   0
   5   0  -2    0.52    0.72   0
   5   3   0   26.04    1.12   0
   5   6   1   34.15    1.23   0
   6  -3  -8   19.81    1.85   0
   6   0  -3    0.43    0.85   0
   6   3  -1   29.27    1.13   0
   7  -2  -8  179.79    2.53   0
   7  -1  -6   -0.28    1.14   0
   7   3  -2   13.07    1.18   0
   7   6  -1  200.34    2.51   0
   8   0  -7    0.08    2.01   0
   8   4  -3    9.00    1.33   0
   8   7  -2    1.08    1.53   0
  -8   3  -5   87.16    2.25   0
  -8   6  -3    0.33    2.13   0
  -7   0  -7   54.27    1.72   0
  -7   1  -5   10.67    1.28   0
  -7   2  -4   90.73    1.68   0
  -7   3  -3  404.38    3.00   0
  -7   7  -1   18.87    1.43   0
  -7   8  -1   67.54    1.88   0
  -6  -2  -9    0.14    1.59   0
  -6  -2  -8    1.15    1.85   0
  -6  -1  -6    2.80    1.16   0
  -6   0  -4  804.86    4.07   0
  -6   1  -3   81.22    1.49   0
  -6   2  -2  344.62    2.76   0
  -6   6   0   18.59    1.17   0
  -5  -3  -8   75.61    2.12   0
  -5   2  -1   79.31    1.56   0
  -5   6   1   49.60    1.68   0
  -4  -4 -11   -0.06    1.72   0
  -4  -4 -10   10.92    1.51   0
  -4  -4  -9  158.98    2.73   0
  -4   2   0    6.63    0.86   0
  -4   4   1    0.60    0.75   0
  -4   8   2   78.31    2.12   0
  -4   9   2   70.90    1.88   0
  -4  10   2  180.73    2.91   0
  -4  11   2    0.82    1.74   0
  -3   1   0  194.94    2.84   0
  -2   2   1  855.14    6.92   0
  -1   8   3   59.83    5.22   0
   1   4   2  630.48    6.89   0
   2  -4  -5  349.77    5.45   0
   3   3   1 1215.33    6.33   0
   3   6   2  495.83    4.14   0
   3  13   2    1.24    1.62   0
   4  -4  -7  100.87    2.44   0
   4  -3  -5    1.74    1.20   0
   4   2   0    6.06    0.78   0
   5  -4  -9   10.95    1.47   0
   5   7   1   62.04    1.51   0
   5   8   1  142.79    2.29   0
   5  11   1    2.03    1.96   0
   5  12   1   -1.12    1.72   0
   6  -3  -9   23.68    2.08   0
   6  -2  -6  149.38    2.18   0
[truncated: 1,753,263 more chars]
