# Supplementary material
Source: MDPI journal article supplement (https://www.mdpi.com/2304-6740/11/12/473)
Supplement: s1 [file s1 › SRiedel_JWagler_SupportingInformation_Azidopyridine-SiCl4-adducts.pdf]

# **The Hexacoordinate Si Complex SiCl<sub>4</sub>(4-Azidopyridine) 2—Crystallographic Characterization of Two Conformers and Probing the Influence of SiCl<sub>4</sub>-Complexation on a Click Reaction with Phenylacetylene**

*Sophie Riedel*<sup>1</sup>, *Maik Gerwig*<sup>1</sup>, *Daniela Gerlach*<sup>1</sup>, *Erica Brendler*<sup>2</sup>, *Robert Gericke*<sup>3</sup>,  
*Edwin Kroke*<sup>1,4</sup> and *Jörg Wagler*<sup>1,\*</sup>

<sup>1</sup> Technische Universität Bergakademie Freiberg, Institut für Anorganische Chemie,  
Leipziger Straße 29, 09596 Freiberg, Germany; [sophie.riedel@chemie.tu-freiberg.de](mailto:sophie.riedel@chemie.tu-freiberg.de) (S.R.);  
[maikgerwig@gmx.de](mailto:maikgerwig@gmx.de) (M.G.); [d\\_gerlach@gmx.de](mailto:d_gerlach@gmx.de) (D.G.); )

<sup>2</sup> Technische Universität Bergakademie Freiberg, Institut für Analytische Chemie, Leipziger  
Straße 29, 09596 Freiberg, Germany

<sup>3</sup> Helmholtz-Zentrum Dresden-Rossendorf e.V., Institute of Resource Ecology, Bautzner  
Landstraße 400, 01328 Dresden, Germany

<sup>4</sup> Zentrum für effiziente Hochtemperaturstoffwandlung (ZeHS), TU Bergakademie Freiberg,  
D-09596 Freiberg, Germany

\* Correspondence: [joerg.wagler@chemie.tu-freiberg.de](mailto:joerg.wagler@chemie.tu-freiberg.de); Tel.: +49-3731-39-4343

## Supporting Information:

Content:

- Raman spectra of **2'** and **2''**
- $^1\text{H}$  and  $^{13}\text{C}\{^1\text{H}\}$  NMR spectra of  $\text{CDCl}_3$  solutions of **1** and **2'**
- $^{29}\text{Si}\{^1\text{H}\}$  NMR spectrum of a  $\text{CDCl}_3$  solution of **2'**
- $^{13}\text{C}$  CP/MAS NMR spectra of **2'** and **2''**
- $^{13}\text{C}$  CP/MAS NMR spectra of two samples of **2'** (obtained from reaction in chloroform at room temperature and obtained from reaction in toluene at  $-78\text{ }^\circ\text{C}$ )
- Graphics of the molecular structure and tables with bond lengths and angles of **1,4-3** and **1,5-3** in their crystal structures
- Graphics and tables with Cartesian coordinates of optimized molecular structures of **2'** and **2''** (as single molecules and in their crystal environment)
- Graphics of the orientation of the  $^{29}\text{Si}$  CSA tensor principal axes in the molecular structures of **2'** and **2''**

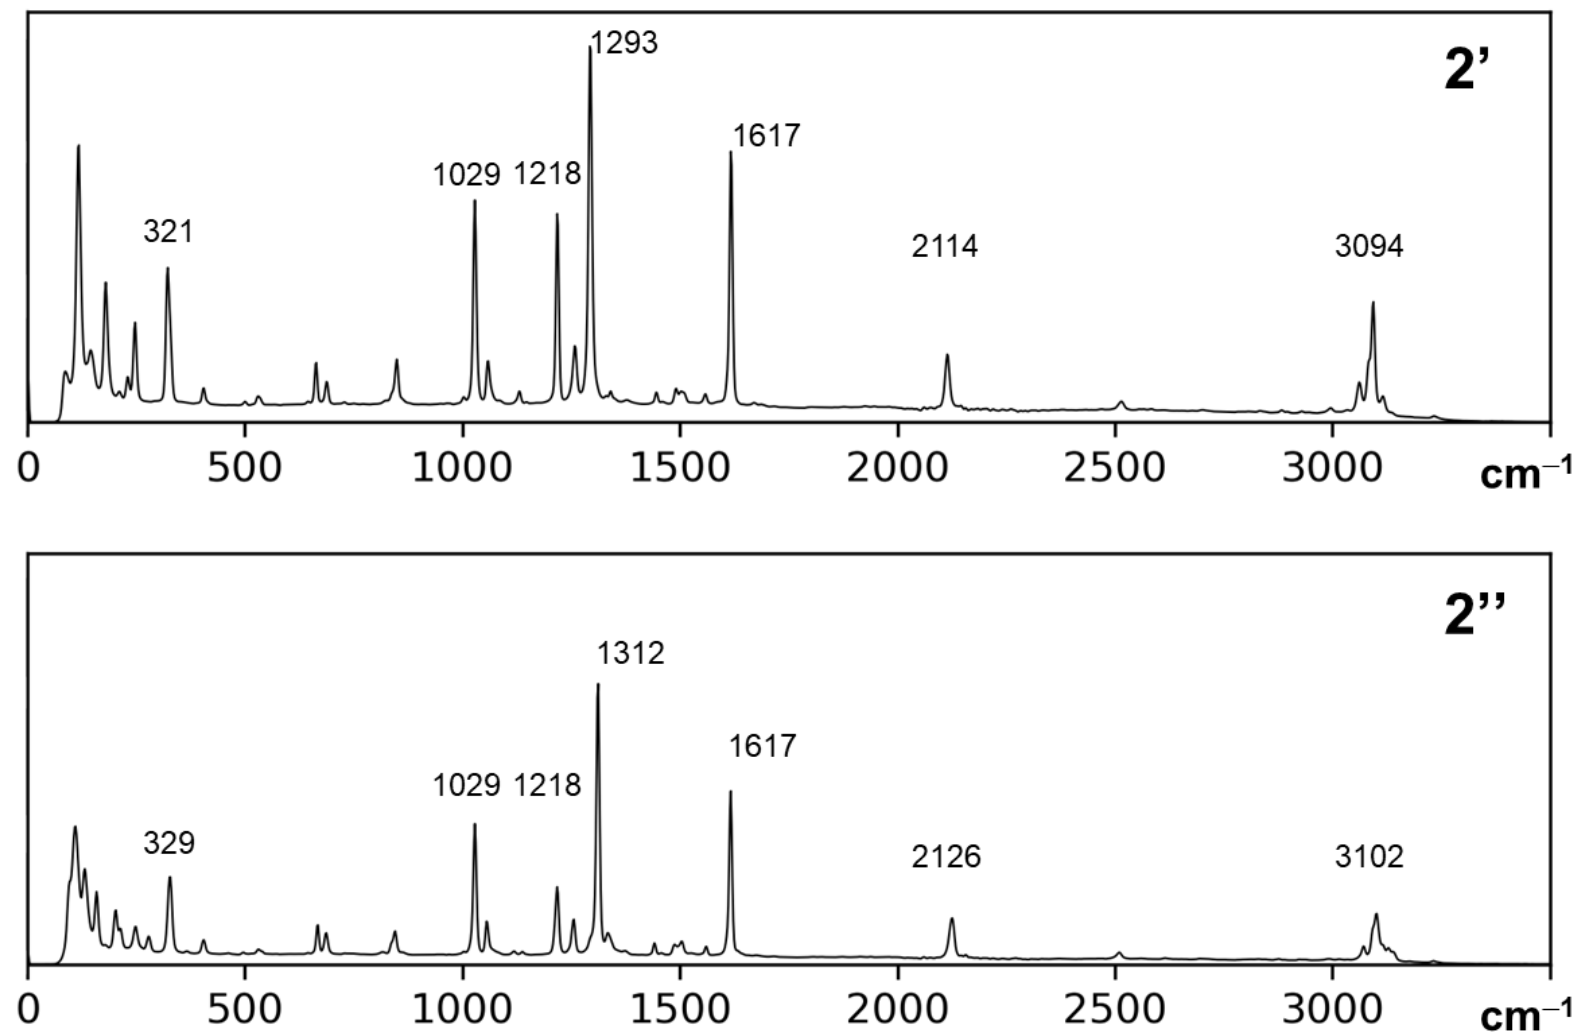

**Figure S1.** Raman spectra of **2'** and **2''** (recorded from the solids in glass capillaries) with wavenumbers of selected bands.

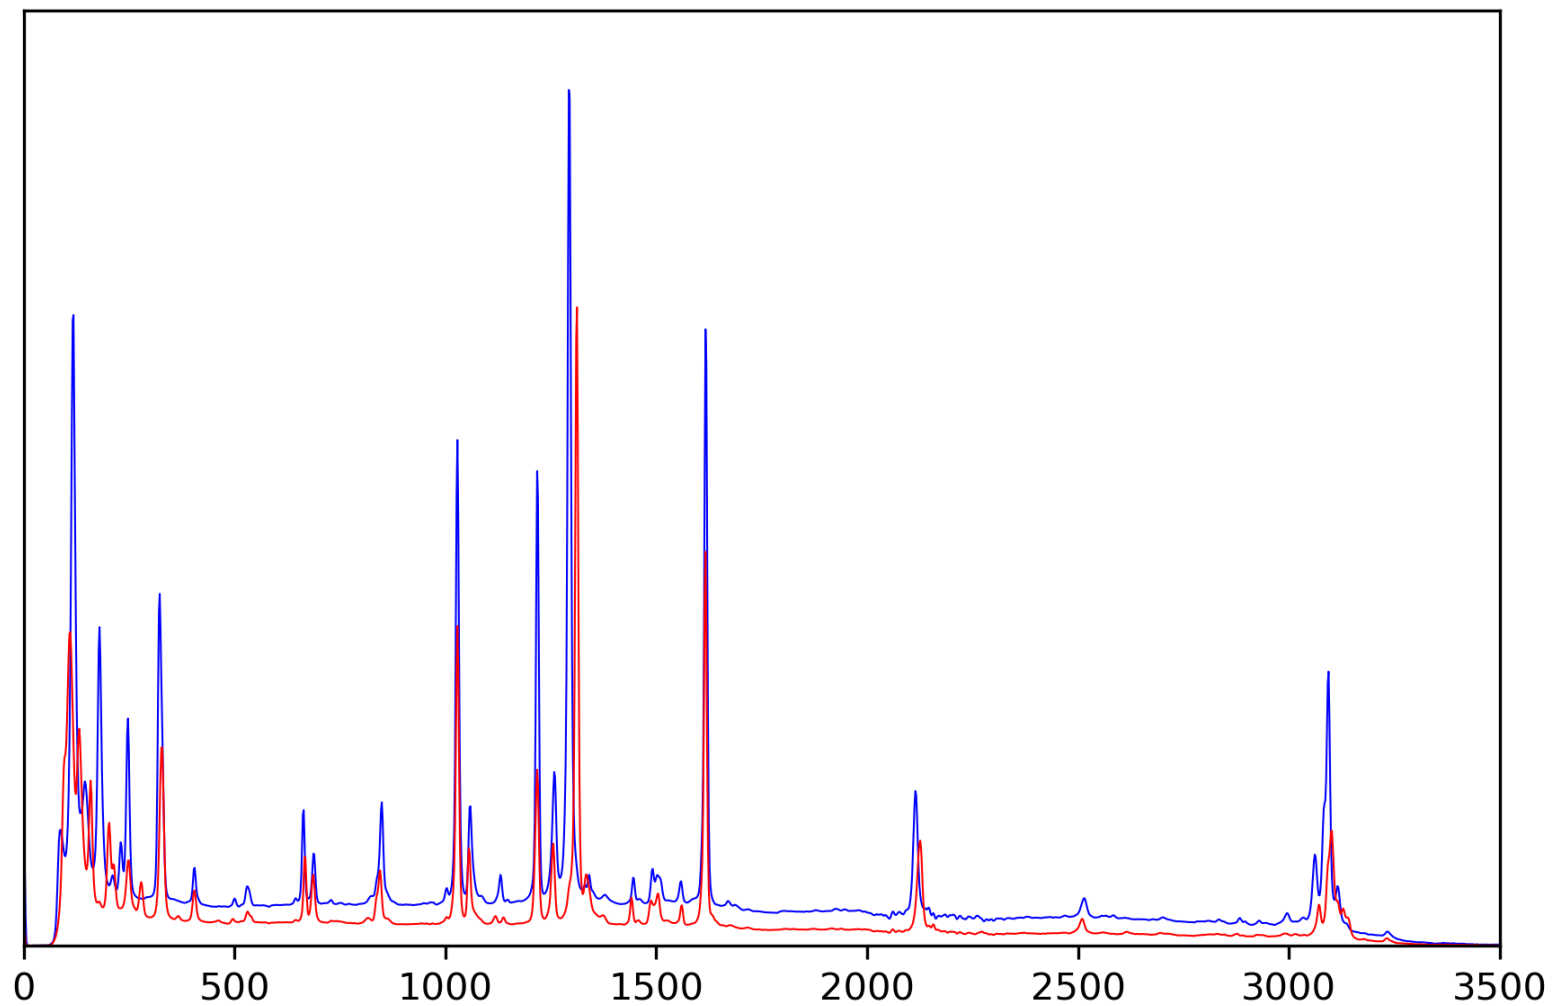

**Figure S2.** Overlay of the Raman spectra of **2'** (blue) and **2''** (red), which are shown as individual spectra in Figure S1. In addition to the band of the -N<sub>3</sub> stretch (2114 vs. 2126 cm<sup>-1</sup>), the band at 1293 vs. 1312 cm<sup>-1</sup> represents a suitable feature to distinguish **2'** from **2''**, respectively.

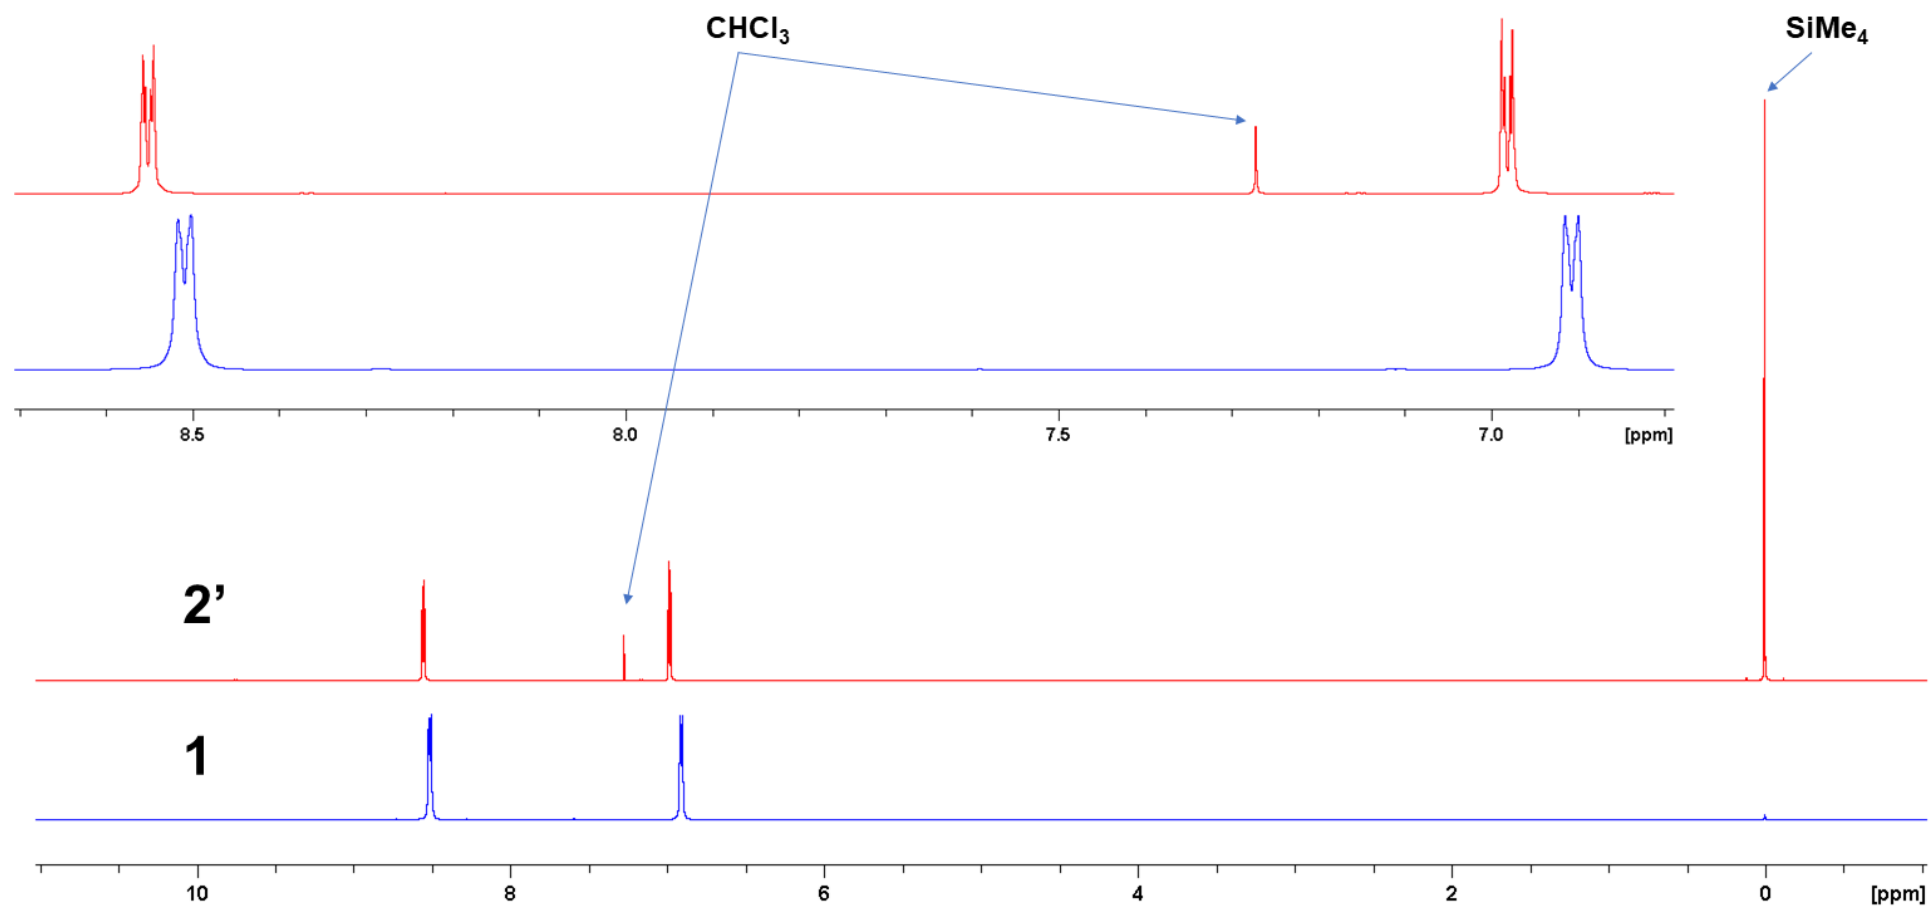

**Figure S3.**  $^1\text{H}$  NMR spectra of a solution of **1** in  $\text{CDCl}_3$  and of a solution of **2'** in  $\text{CDCl}_3$  (full spectrum and magnified inset).

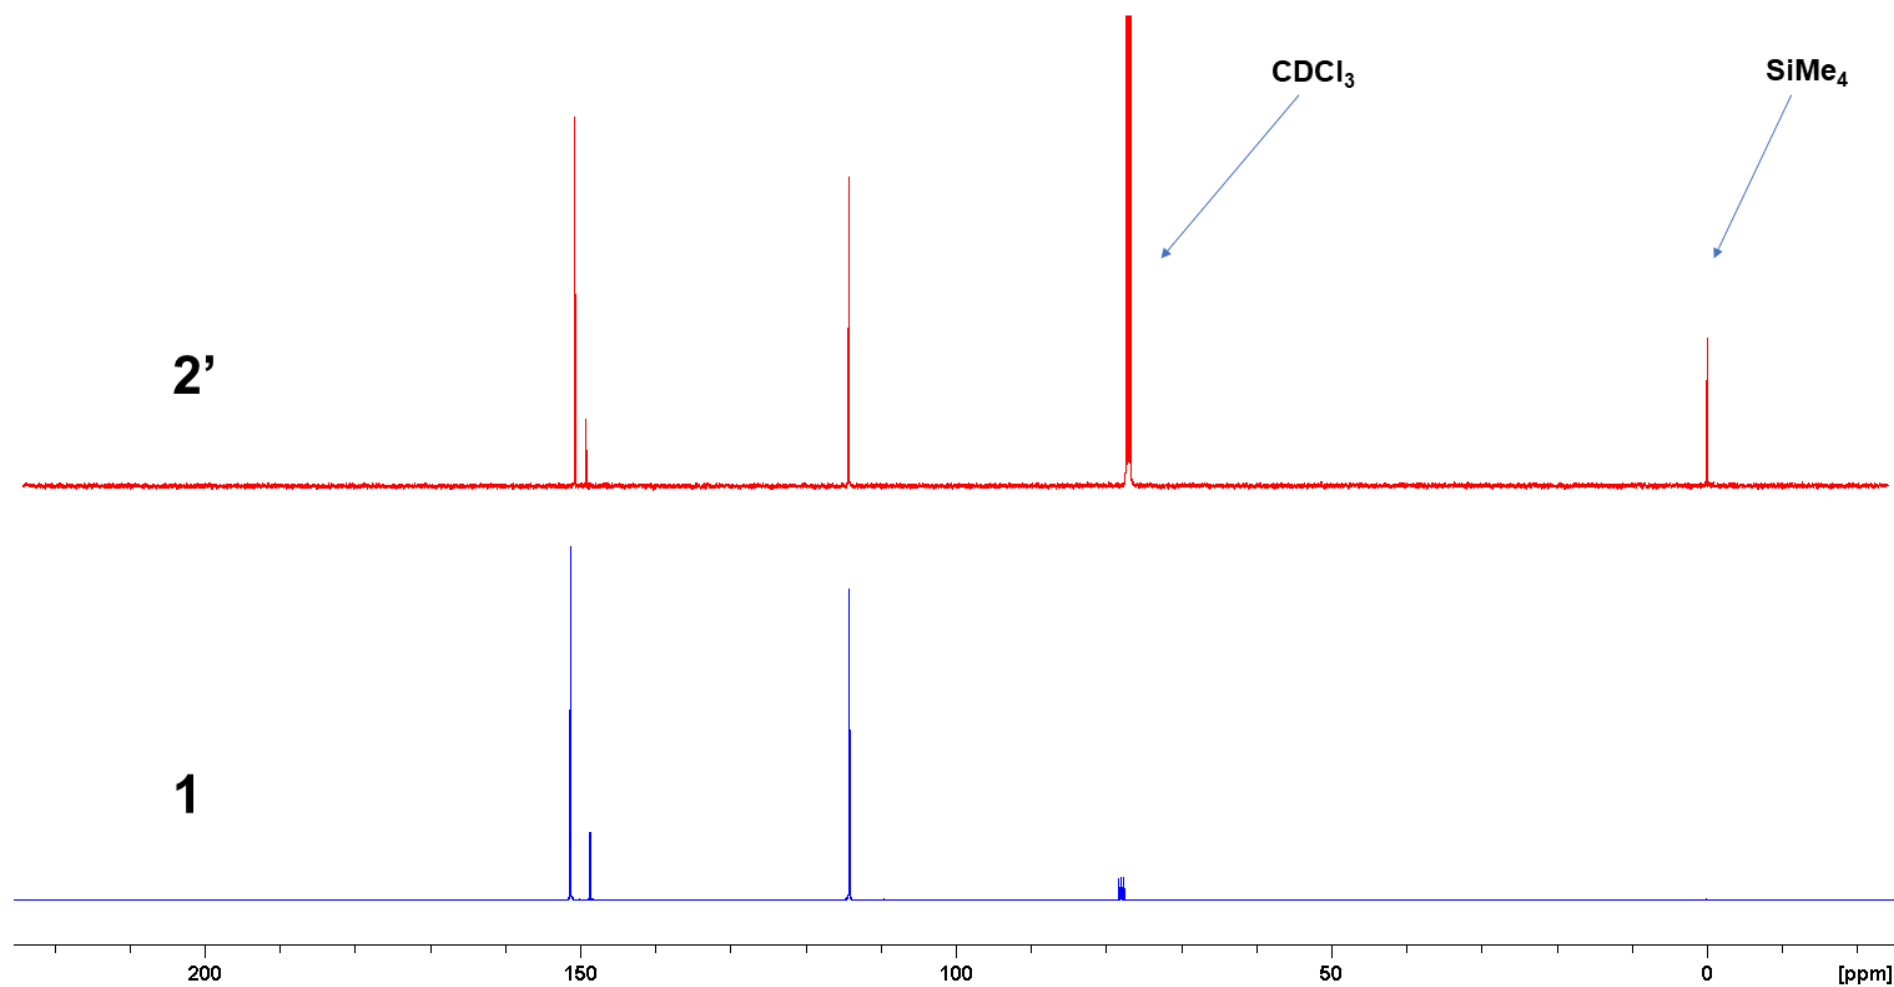

**Figure S4.**  $^{13}\text{C}\{^1\text{H}\}$  NMR spectra of a solution of **1** in  $\text{CDCl}_3$  and of a solution of **2'** in  $\text{CDCl}_3$ .

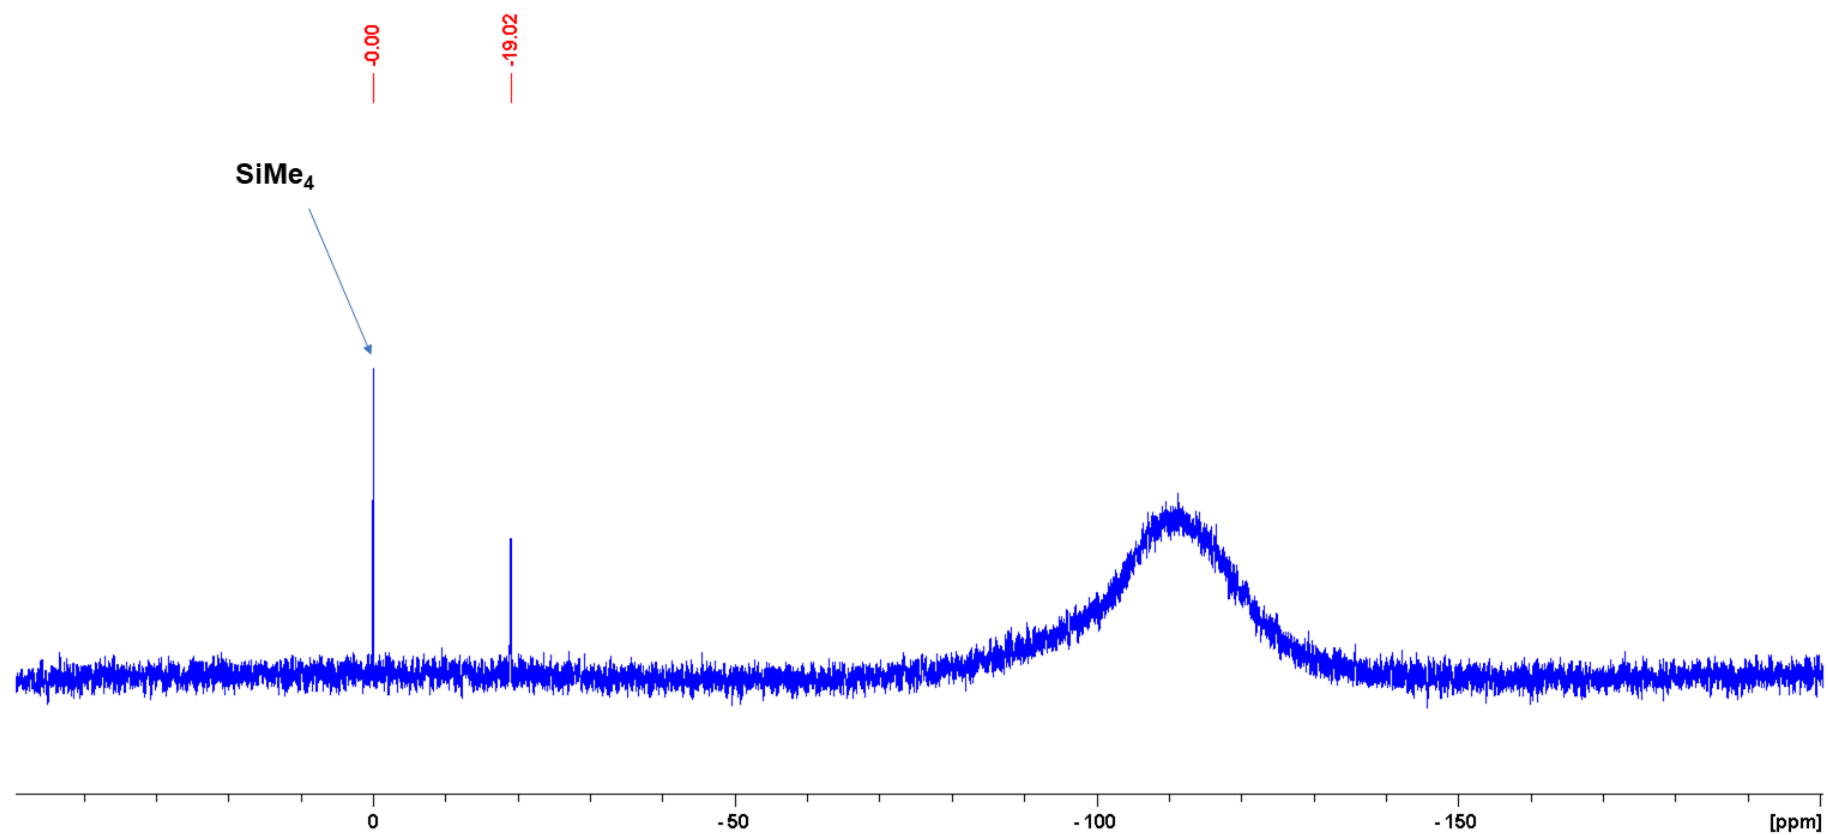

**Figure S5.**  $^{29}\text{Si}\{^1\text{H}\}$  NMR spectrum of a solution of **2'** in  $\text{CDCl}_3$ .

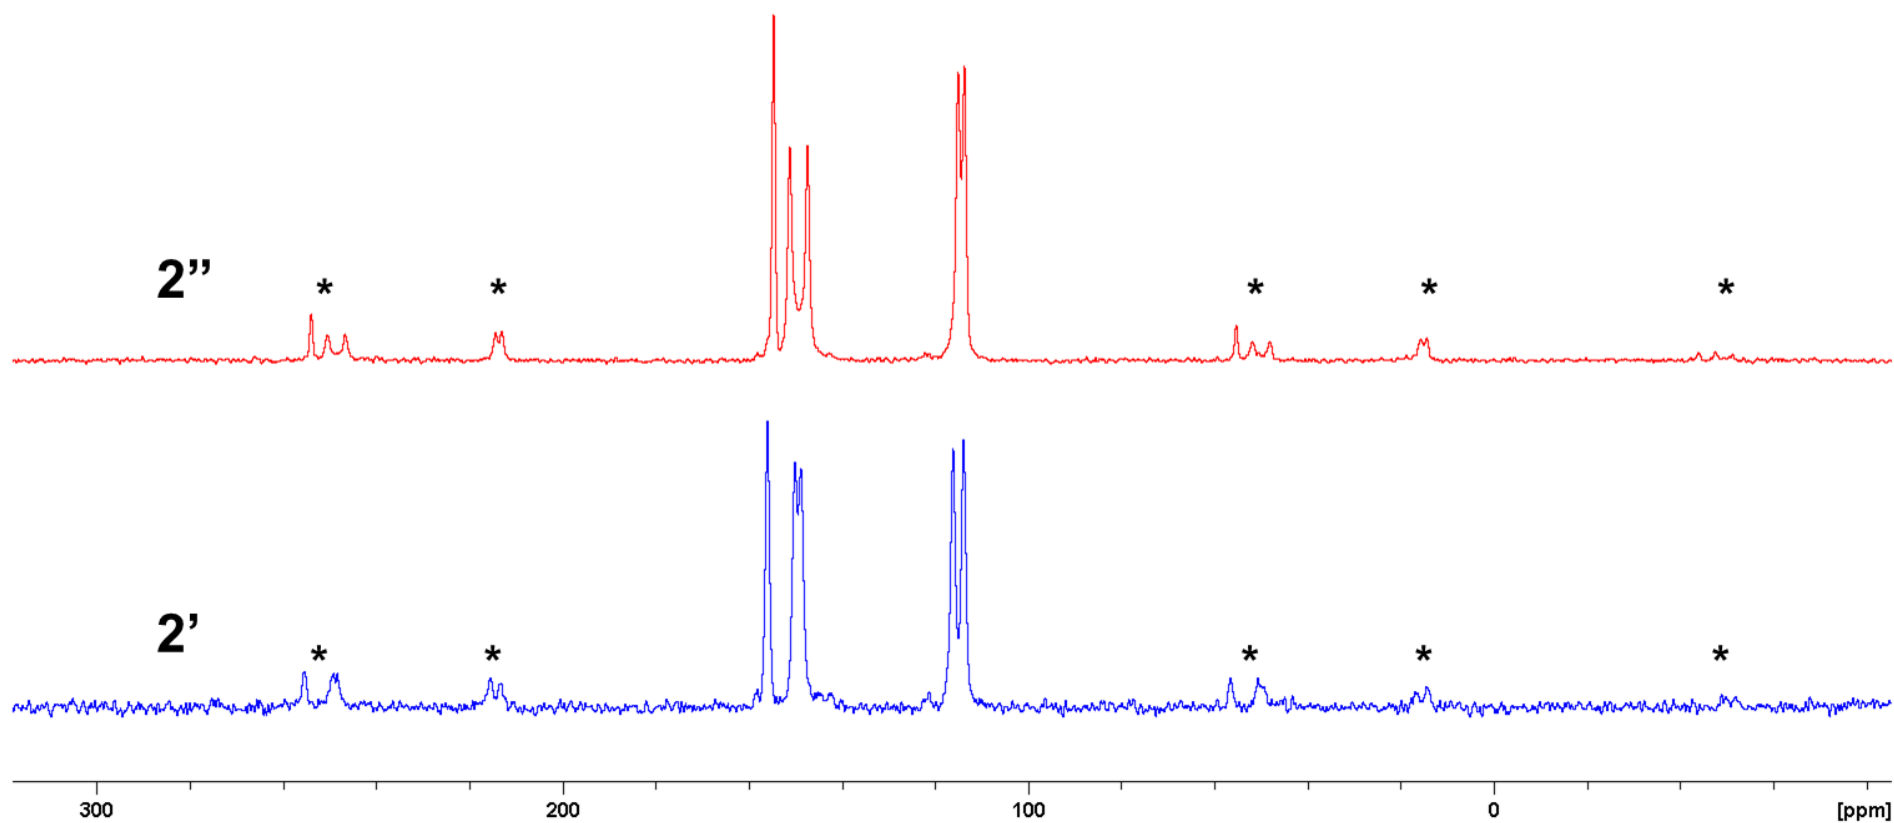

**Figure S6.**  $^{13}\text{C}$  CP/MAS NMR spectra of **2'** and **2''** recorded at an MAS frequency of 10 kHz and with a CP contact time of  $\tau = 2$  ms. The groups of signals marked with an asterisk (\*) are spinning side bands.

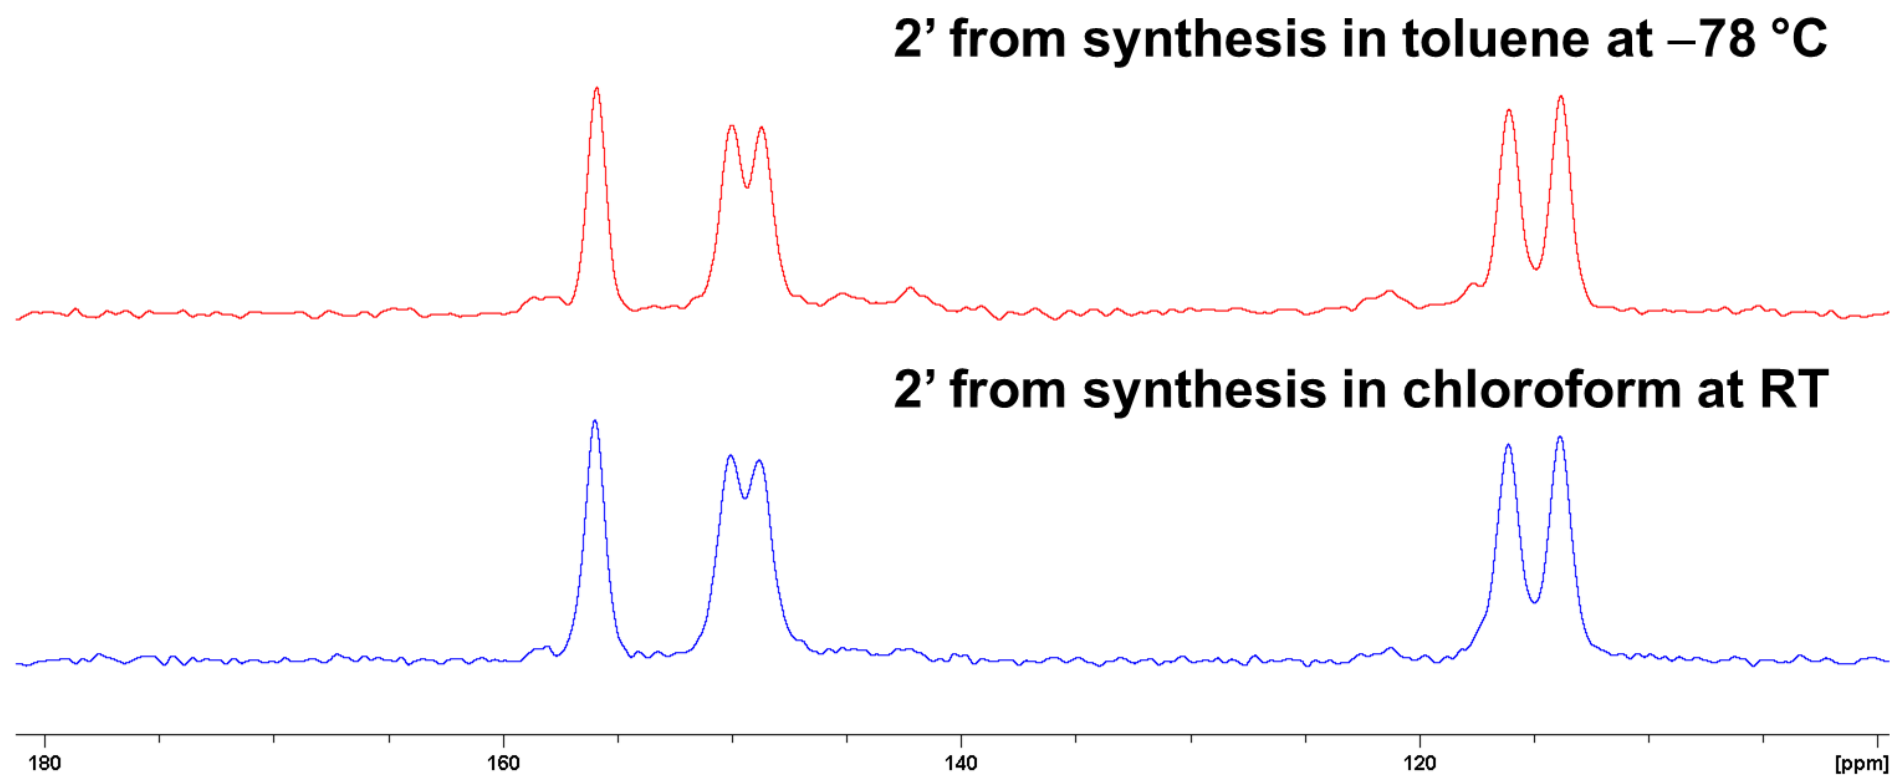

**Figure S7.**  $^{13}\text{C}$  CP/MAS NMR spectra (section of isotropic chemical shift signals) of **2'** obtained from reaction in chloroform at room temperature and obtained from reaction in toluene at  $-78\text{ }^{\circ}\text{C}$ . (Spectra were recorded at an MAS frequency of 10 kHz and with a CP contact time of  $\tau = 2\text{ ms.}$ )

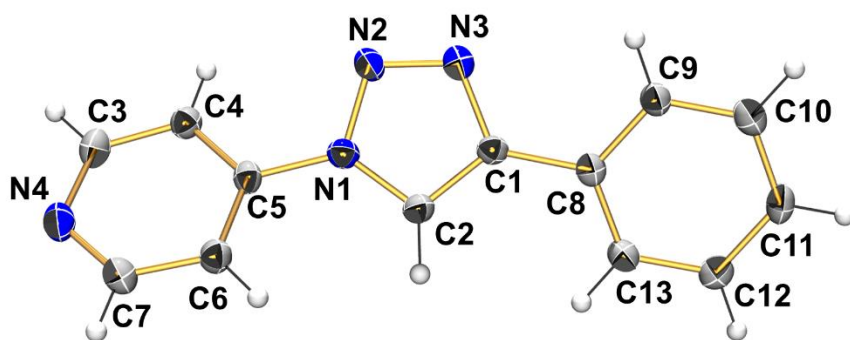

**Figure S8.** Molecular structure of 1,4-**3** with thermal displacement ellipsoids at the 50% probability level and labels of non-hydrogen atoms.

**Table S1.** Selected bond lengths (Å) and angles (deg) of 1,4-**3** in the crystal structure.

| Bond        | Length   | Bonds             | Bond Angle |
|-------------|----------|-------------------|------------|
| N(1)-C(2)   | 1.355(3) | C(2)-N(1)-N(2)    | 110.64(17) |
| N(1)-N(2)   | 1.357(3) | C(2)-N(1)-C(5)    | 129.70(19) |
| N(1)-C(5)   | 1.430(3) | N(2)-N(1)-C(5)    | 119.65(17) |
| N(2)-N(3)   | 1.311(3) | N(3)-N(2)-N(1)    | 106.89(18) |
| N(3)-C(1)   | 1.366(3) | N(2)-N(3)-C(1)    | 109.55(19) |
| N(4)-C(7)   | 1.340(3) | C(7)-N(4)-C(3)    | 116.49(19) |
| N(4)-C(3)   | 1.343(3) | N(3)-C(1)-C(2)    | 108.01(18) |
| C(1)-C(2)   | 1.372(3) | N(3)-C(1)-C(8)    | 121.9(2)   |
| C(1)-C(8)   | 1.460(3) | C(2)-C(1)-C(8)    | 130.1(2)   |
| C(3)-C(4)   | 1.388(3) | N(1)-C(2)-C(1)    | 104.91(17) |
| C(4)-C(5)   | 1.380(3) | N(4)-C(3)-C(4)    | 123.9(2)   |
| C(5)-C(6)   | 1.381(3) | C(5)-C(4)-C(3)    | 117.7(2)   |
| C(6)-C(7)   | 1.386(3) | C(4)-C(5)-C(6)    | 120.1(2)   |
| C(8)-C(13)  | 1.395(3) | C(4)-C(5)-N(1)    | 119.6(2)   |
| C(8)-C(9)   | 1.399(3) | C(6)-C(5)-N(1)    | 120.2(2)   |
| C(9)-C(10)  | 1.384(3) | C(5)-C(6)-C(7)    | 117.5(2)   |
| C(10)-C(11) | 1.384(3) | N(4)-C(7)-C(6)    | 124.3(2)   |
| C(11)-C(12) | 1.383(3) | C(13)-C(8)-C(9)   | 118.9(2)   |
| C(12)-C(13) | 1.387(3) | C(13)-C(8)-C(1)   | 121.3(2)   |
|             |          | C(9)-C(8)-C(1)    | 119.8(2)   |
|             |          | C(10)-C(9)-C(8)   | 120.4(2)   |
|             |          | C(9)-C(10)-C(11)  | 120.3(2)   |
|             |          | C(12)-C(11)-C(10) | 119.8(2)   |
|             |          | C(11)-C(12)-C(13) | 120.4(2)   |
|             |          | C(12)-C(13)-C(8)  | 120.2(2)   |

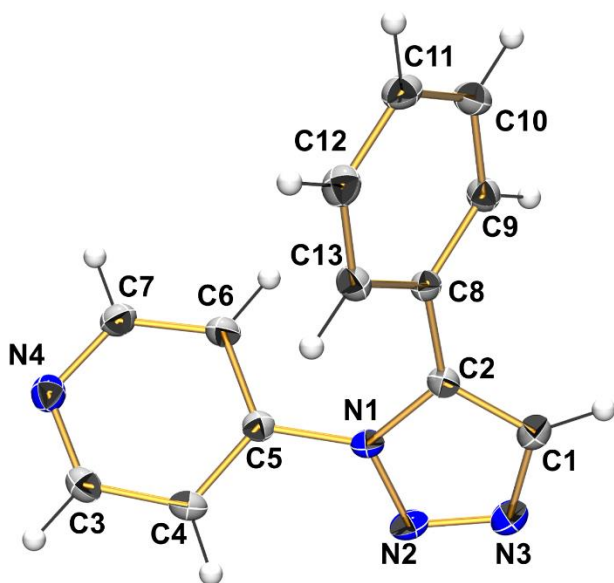

**Figure S9.** Molecular structure of 1,5-3 with thermal displacement ellipsoids at the 50% probability level and labels of non-hydrogen atoms.

**Table S2.** Selected bond lengths (Å) and angles (deg) of 1,5-3 in the crystal structure.

| Bond        | Length     | Bonds             | Bond Angle |
|-------------|------------|-------------------|------------|
| N(1)-N(2)   | 1.3599(12) | N(2)-N(1)-C(2)    | 111.15(9)  |
| N(1)-C(2)   | 1.3601(13) | N(2)-N(1)-C(5)    | 119.27(9)  |
| N(1)-C(5)   | 1.4250(14) | C(2)-N(1)-C(5)    | 129.24(9)  |
| N(2)-N(3)   | 1.3088(14) | N(3)-N(2)-N(1)    | 106.79(9)  |
| N(3)-C(1)   | 1.3567(15) | N(2)-N(3)-C(1)    | 109.02(9)  |
| N(4)-C(7)   | 1.3368(15) | C(7)-N(4)-C(3)    | 116.70(10) |
| N(4)-C(3)   | 1.3389(15) | N(3)-C(1)-C(2)    | 109.59(10) |
| C(1)-C(2)   | 1.3708(15) | N(1)-C(2)-C(1)    | 103.45(9)  |
| C(2)-C(8)   | 1.4701(14) | N(1)-C(2)-C(8)    | 125.60(9)  |
| C(3)-C(4)   | 1.3827(16) | C(1)-C(2)-C(8)    | 130.87(10) |
| C(4)-C(5)   | 1.3831(15) | N(4)-C(3)-C(4)    | 124.13(10) |
| C(5)-C(6)   | 1.3852(15) | C(3)-C(4)-C(5)    | 117.68(10) |
| C(6)-C(7)   | 1.3859(16) | C(4)-C(5)-C(6)    | 119.82(10) |
| C(8)-C(9)   | 1.3929(14) | C(4)-C(5)-N(1)    | 120.23(9)  |
| C(8)-C(13)  | 1.3951(15) | C(6)-C(5)-N(1)    | 119.92(10) |
| C(9)-C(10)  | 1.3894(15) | C(5)-C(6)-C(7)    | 117.63(10) |
| C(10)-C(11) | 1.3843(16) | N(4)-C(7)-C(6)    | 124.03(10) |
| C(11)-C(12) | 1.3889(17) | C(9)-C(8)-C(13)   | 119.52(10) |
| C(12)-C(13) | 1.3873(16) | C(9)-C(8)-C(2)    | 118.97(10) |
|             |            | C(13)-C(8)-C(2)   | 121.46(9)  |
|             |            | C(10)-C(9)-C(8)   | 120.23(10) |
|             |            | C(11)-C(10)-C(9)  | 120.11(10) |
|             |            | C(10)-C(11)-C(12) | 119.85(10) |
|             |            | C(13)-C(12)-C(11) | 120.40(11) |
|             |            | C(12)-C(13)-C(8)  | 119.89(10) |

### Atomic coordinates and total energies:

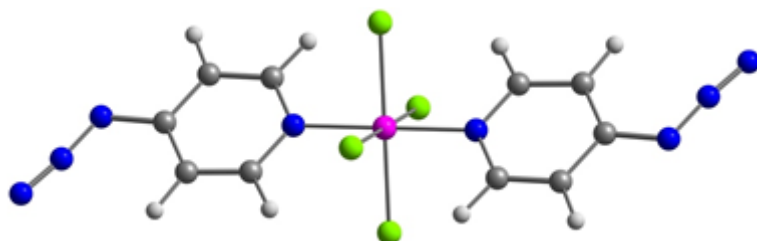

**Figure S10.** Optimized molecular structure of **2'**.

PBE0:

final single point energy: -2963.721207899691 a.u.

final Gibbs free energy: -2963.57161262 a.u.

**Table S3.** Atomic coordinates for optimized structure of **2'**.

|    |            |            |             |
|----|------------|------------|-------------|
| Si | 2.72384900 | 5.29550400 | -0.13199800 |
| Cl | 1.14534100 | 3.77508700 | -0.06065900 |
| Cl | 4.27354600 | 3.74422600 | -0.06583800 |
| Cl | 4.30235700 | 6.81592200 | -0.20334600 |
| Cl | 1.17415300 | 6.84678400 | -0.19814900 |
| C  | 2.73375000 | 6.67387100 | 3.83721000  |
| C  | 2.72702100 | 5.51070900 | 4.60188100  |
| C  | 2.72362600 | 4.28266000 | 3.94111000  |
| C  | 2.72337100 | 4.26789800 | 2.56839000  |
| C  | 2.73427200 | 6.56948200 | 2.46917400  |
| C  | 2.71336500 | 4.02152500 | -2.73317000 |
| C  | 2.71390100 | 3.91713500 | -4.10120600 |
| C  | 2.72071300 | 5.08029600 | -4.86587800 |
| C  | 2.72417100 | 6.30834500 | -4.20510800 |
| C  | 2.72440700 | 6.32310800 | -2.83238900 |
| H  | 2.71826900 | 3.33652800 | 2.02235600  |
| H  | 2.73875600 | 7.44836100 | 1.84388800  |
| H  | 2.73744000 | 7.64640600 | 4.31018000  |
| H  | 2.70881800 | 3.14264700 | -2.10788300 |
| H  | 2.71016000 | 2.94459900 | -4.57417400 |
| H  | 2.71974900 | 3.34329400 | 4.47715600  |
| H  | 2.72811500 | 7.24771000 | -4.74115600 |
| H  | 2.72956000 | 7.25447900 | -2.28635500 |
| N  | 2.73260700 | 6.79102600 | -7.66958100 |
| N  | 2.72447200 | 5.66427500 | 5.98297300  |
| N  | 2.72847900 | 5.38743800 | 1.83481800  |
| N  | 2.71589000 | 4.64180300 | 6.67058900  |
| N  | 2.71922100 | 5.20357000 | -2.09881500 |
| N  | 2.72328100 | 4.92672700 | -6.24696900 |
| N  | 2.71529400 | 3.79997300 | 7.40558200  |
| N  | 2.73194300 | 5.94919700 | -6.93458600 |

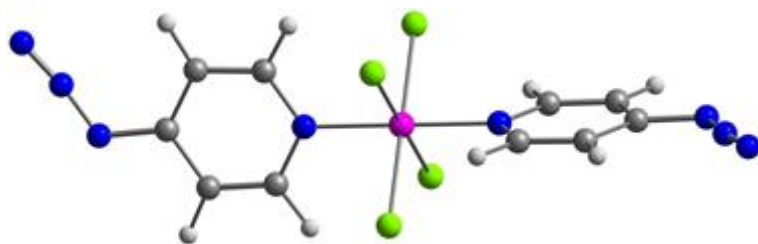

**Figure S11.** Optimized molecular structure of **2''**.

PBE0:

final single point energy: -2963.720885691764 a.u.

final Gibbs free energy: -2963.57146238 a.u.

**Table S4.** Atomic coordinates for optimized structure of **2''**.

|    |             |             |             |
|----|-------------|-------------|-------------|
| Si | 1.94516400  | -2.36224200 | 1.57940700  |
| Cl | 4.14030900  | -2.36138700 | 1.57902700  |
| Cl | 1.94579300  | -0.17325300 | 1.57893400  |
| Cl | -0.24882600 | -2.36309100 | 1.57931500  |
| Cl | 1.94832600  | -4.55123100 | 1.58040700  |
| N  | 1.87901500  | -2.43885300 | 7.70910100  |
| N  | 2.61562000  | -1.69366200 | 8.35751900  |
| N  | 3.23156000  | -1.08008500 | 9.06010100  |
| N  | 1.94404000  | -2.36282300 | 3.55236400  |
| N  | 1.94388700  | -2.36165600 | -0.39355800 |
| N  | 1.87791300  | -2.28612900 | -4.55029300 |
| N  | 2.62018000  | -3.02587600 | -5.19882100 |
| N  | 3.24076400  | -3.63490200 | -5.90149400 |
| C  | 2.78238000  | -1.51178100 | 5.61104900  |
| C  | 2.74944400  | -1.54284200 | 4.23873000  |
| C  | 1.13823200  | -3.18687500 | 4.23699700  |
| C  | 1.10876600  | -3.22102000 | 5.60781200  |
| C  | 1.94509700  | -2.36861100 | 6.32337600  |
| C  | 1.13167400  | -1.54358200 | -1.07808400 |
| C  | 1.10182000  | -1.50967100 | -2.44889600 |
| C  | 1.94466900  | -2.35586500 | -3.16457700 |
| C  | 2.78862500  | -3.20646800 | -2.45236400 |
| C  | 2.75554900  | -3.17566400 | -1.08004100 |
| H  | 0.49164300  | -0.90379700 | -0.49131900 |
| H  | 3.38372600  | -0.89514000 | 3.65426300  |
| H  | 0.43208900  | -0.83456900 | -2.96202000 |
| H  | 0.44436500  | -3.90110100 | 6.12102700  |
| H  | 3.45632400  | -0.82532000 | 6.10537800  |
| H  | 3.46785500  | -3.88789200 | -2.94678600 |
| H  | 0.50320600  | -3.83145500 | 3.65031400  |
| H  | 3.39494600  | -3.81858600 | -0.49566500 |

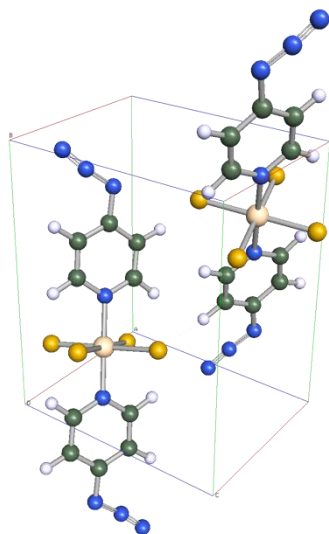

**Figure S12.** Optimized crystal structure of **2'** (perspective view of the optimized unit cell with the two molecules of **2'** contained therein).

PBE:

final single point energy: -5905.3937808735 a.u.

cell parameters:  $a = 7.332073 \text{ \AA}$ ,  $b = 10.78938 \text{ \AA}$ ,  $c = 9.203535 \text{ \AA}$ ,  
 $\alpha = 90.0581187752^\circ$ ,  $\beta = 95.2484962287^\circ$ ,  $\gamma = 90.0916130243^\circ$ ,

**Table S5.** Atomic coordinates for optimized structure of **2'**.

|    |             |             |            |
|----|-------------|-------------|------------|
| Si | 1.62492600  | 2.67282700  | 2.70245500 |
| Si | 4.86819600  | 8.05689100  | 7.28681400 |
| Cl | -0.43972100 | 3.50950700  | 3.09617700 |
| Cl | 1.11429700  | 2.37039600  | 0.54701800 |
| Cl | 4.35600000  | 8.35737300  | 5.13154500 |
| Cl | 3.69053500  | 1.83736200  | 2.30618600 |
| Cl | 2.13237700  | 2.97514000  | 4.85834900 |
| Cl | 5.38278600  | 7.75544700  | 9.44086800 |
| Cl | 6.92932000  | 8.90052000  | 6.88851300 |
| Cl | 2.80572800  | 7.21403900  | 7.68555400 |
| C  | 3.09205000  | 7.09999800  | 1.94458800 |
| C  | 3.90035300  | 6.20520000  | 2.65508500 |
| C  | 3.46794500  | 4.90616600  | 2.80884800 |
| C  | 1.90344400  | 6.63046900  | 1.37339100 |
| C  | 1.52542200  | 5.32477700  | 1.57356200 |
| C  | -0.20964100 | 0.42952800  | 2.59790700 |
| C  | -0.63386000 | -0.87225800 | 2.75383100 |
| C  | 0.17956100  | -1.76155900 | 3.46540000 |
| C  | 1.36543800  | -1.28397700 | 4.03539900 |
| C  | 1.73521400  | 0.02395100  | 3.83411900 |

|   |             |             |            |
|---|-------------|-------------|------------|
| C | 5.14227800  | 4.10370300  | 5.94889400 |
| C | 4.76717200  | 5.40956400  | 6.15272900 |
| C | 6.32850900  | 3.62916500  | 6.52075500 |
| C | 7.13814800  | 4.52007800  | 7.23440500 |
| C | 6.70980200  | 5.82036800  | 7.39025900 |
| C | 3.01930800  | 10.28509300 | 7.17860000 |
| C | 2.58615400  | 11.58456900 | 7.32725700 |
| C | 3.39116300  | 12.48104800 | 8.03951300 |
| C | 4.57908100  | 12.01379000 | 8.61442300 |
| C | 4.96045600  | 10.70881000 | 8.41481800 |
| H | -1.58408600 | -1.19686500 | 2.33614800 |
| H | 4.05429000  | 4.16371000  | 3.33765000 |
| H | 0.59229800  | 4.92963500  | 1.18026300 |
| H | 2.03937800  | -1.93983900 | 4.58669800 |
| H | 2.66633000  | 0.42562300  | 4.22578000 |
| H | 4.47163800  | 3.44718800  | 5.39455300 |
| H | 3.83519800  | 5.80819000  | 5.76026800 |
| H | 8.08686500  | 4.19719100  | 7.65679200 |
| H | 7.29712900  | 6.56019300  | 7.92156200 |
| H | 2.43318500  | 9.53960100  | 6.65384900 |
| H | 1.63612100  | 11.90160200 | 6.90291500 |
| H | 4.85239800  | 6.52235400  | 3.07438700 |
| H | -0.79980600 | 1.16788900  | 2.06717400 |
| H | 5.24560100  | 12.67561600 | 9.16778600 |
| H | 1.23456900  | 7.29031800  | 0.82064400 |
| H | 5.89507700  | 10.31624200 | 8.80761100 |
| N | 0.53460600  | -3.84741700 | 4.24786800 |
| N | 1.12966400  | -4.63476400 | 4.85146400 |
| N | 5.52964900  | 6.26725900  | 6.87899000 |
| N | 6.72546100  | 2.28962700  | 6.43638700 |
| N | 5.97844700  | 1.54265300  | 5.73902400 |
| N | 5.38381700  | 0.75355000  | 5.13738700 |
| N | 4.20166900  | 9.84540200  | 7.69154300 |
| N | 0.96910100  | 0.87993800  | 3.10935800 |
| N | 2.28622700  | 4.46356700  | 2.29744000 |
| N | 3.49311100  | 8.43827700  | 1.86257800 |
| N | 2.74761500  | 9.19010800  | 1.16840700 |
| N | -0.21303500 | -3.10238200 | 3.54881200 |
| N | 2.15543500  | 9.98303100  | 0.56955600 |
| N | 2.98662100  | 13.81836400 | 8.12080200 |
| N | 3.72859300  | 14.57162500 | 8.81757000 |
| N | 4.31696400  | 15.36599500 | 9.41795800 |

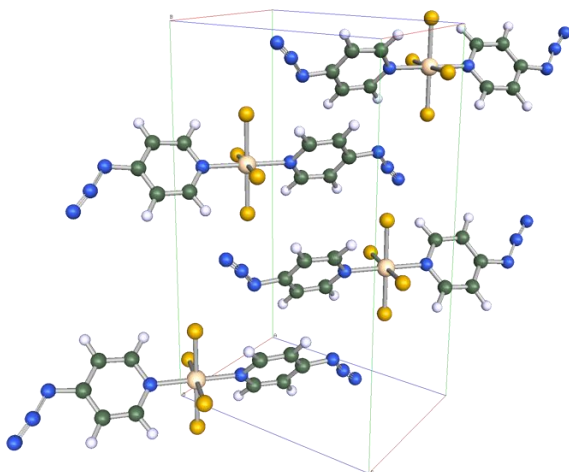

**Figure S13.** Optimized crystal structure of **2''** (perspective view of the optimized unit cell with the four molecules of **2''** contained therein).

PBE:

final single point energy: -11810.7336603415 a.u.

cell parameters:  $a = 8.17893 \text{ \AA}$ ,  $b = 17.395311 \text{ \AA}$ ,  $c = 10.93546 \text{ \AA}$ ,  
 $\alpha = 89.9513496613^\circ$ ,  $\beta = 99.4572766531^\circ$ ,  $\gamma = 90.0341808038^\circ$ ,

**Table S6.** Atomic coordinates for optimized structure of **2''**.

|    |             |             |            |
|----|-------------|-------------|------------|
| Si | 8.88041800  | 15.10784300 | 8.17346200 |
| Si | -2.47811800 | 2.48939500  | 2.77109100 |
| Si | 1.60619900  | 11.18400300 | 2.76660500 |
| Si | 4.79625900  | 6.41378500  | 8.17733200 |
| Cl | -2.47601800 | 4.72879100  | 2.77074400 |
| Cl | 1.61040100  | 13.42360800 | 2.75712400 |
| Cl | 4.79644200  | 8.65080300  | 8.16227300 |
| Cl | 0.00375100  | 11.16067100 | 4.33985000 |
| Cl | 3.19717500  | 6.45529500  | 9.75301800 |
| Cl | 1.60590300  | 8.94678900  | 2.78163800 |
| Cl | 3.20550900  | 11.14249400 | 1.19104300 |
| Cl | -2.47734500 | 0.25197000  | 2.77024600 |
| Cl | -4.07678200 | 2.45657400  | 4.34878000 |
| Cl | 4.79212500  | 4.17435300  | 8.18667200 |
| Cl | -0.88099600 | 2.45623600  | 1.19393200 |
| Cl | 6.39841000  | 6.43737400  | 6.60393800 |
| Cl | 8.87987000  | 17.34529600 | 8.17508300 |
| Cl | 8.87817200  | 12.86813100 | 8.17414900 |
| Cl | 7.28302900  | 15.14076000 | 9.75054200 |
| Cl | 10.47899400 | 15.14014700 | 6.59554000 |
| H  | 1.06806200  | 12.81392400 | 0.39658500 |

|   |             |             |             |
|---|-------------|-------------|-------------|
| H | -0.70638300 | 12.98149400 | -1.31460300 |
| H | -0.76434600 | 9.54450700  | 2.19475400  |
| H | -2.54243400 | 9.48382800  | 0.46440700  |
| H | 2.13816700  | 12.82381100 | 5.13168500  |
| H | 3.98669100  | 9.56283700  | 3.33486500  |
| H | 5.76058000  | 9.50488500  | 5.06975800  |
| H | 3.90715500  | 12.99300100 | 6.85032600  |
| H | 2.49512100  | 4.60451700  | 4.09381200  |
| H | 4.26399100  | 4.77354700  | 5.81255400  |
| H | 0.64179300  | 8.09287200  | 5.87397200  |
| H | 2.41557300  | 8.03490700  | 7.60922900  |
| H | 5.33445400  | 4.78355400  | 10.54728500 |
| H | 7.10885800  | 4.61624000  | 12.25858900 |
| H | 8.94499200  | 8.11384900  | 10.47951000 |
| H | 7.16688900  | 8.05323400  | 8.74908900  |
| H | -1.94812100 | 4.11972400  | 5.14142600  |
| H | -0.17984300 | 4.28700500  | 6.85968900  |
| H | 1.67898000  | 0.80610400  | 5.07038400  |
| H | -0.09419200 | 0.86765300  | 3.33362000  |
| H | -3.01712400 | 4.12483100  | 0.40363300  |
| H | -4.79131900 | 4.29104800  | -1.30898900 |
| H | -6.63739100 | 0.80376500  | 0.48050400  |
| H | -4.85816200 | 0.86412000  | 2.21004500  |
| H | 6.58269100  | 13.31087600 | 4.08446800  |
| H | 8.35041800  | 13.47788900 | 5.80296900  |
| H | 4.72363100  | 16.79143200 | 5.87347700  |
| H | 6.49644600  | 16.72983800 | 7.61077500  |
| H | 9.41922200  | 13.47314200 | 10.54028200 |
| H | 11.19334300 | 13.30631100 | 12.25318100 |
| H | 13.03950800 | 16.79375300 | 10.46413000 |
| H | 11.26073100 | 16.73384800 | 8.73475600  |
| C | 1.39868700  | 6.30995100  | 4.87472000  |
| C | 2.44221300  | 5.38214000  | 4.85204800  |
| C | 3.43452100  | 5.47041000  | 5.80069300  |
| C | 0.24029800  | 12.11536200 | 0.38806400  |
| C | 1.39911200  | 7.31332000  | 5.85234200  |
| C | 2.39541400  | 7.31004900  | 6.80108200  |
| C | 6.16219700  | 5.48224900  | 10.55582600 |
| C | 7.15761300  | 5.39496800  | 11.50134300 |
| C | 8.19878200  | 6.32519700  | 11.47705200 |
| C | 8.19133900  | 7.33082800  | 10.50133200 |
| C | 7.19253300  | 7.32600900  | 9.55504200  |
| C | 2.96772000  | 12.12713100 | 5.14346200  |
| C | -1.11750700 | 3.42421300  | 5.15077100  |
| C | -1.79638500 | 11.27258900 | -0.53304700 |
| C | -0.12582600 | 3.51105600  | 6.09984400  |
| C | 4.00685900  | 10.28770100 | 4.14296100  |
| C | 0.91859700  | 2.58433000  | 6.07545800  |
| C | 0.92017900  | 1.58419200  | 5.09442600  |
| C | -1.78884600 | 10.26690100 | 0.44263100  |
| C | -0.07548100 | 1.58946300  | 4.14464300  |
| C | 5.00321500  | 10.28440000 | 5.09160500  |
| C | -3.84597400 | 3.42736500  | 0.39602300  |
| C | -0.78998000 | 10.27171200 | 1.38884500  |
| C | -4.84115700 | 3.51408100  | -0.54999700 |
| C | 3.96005700  | 12.21539900 | 6.09207100  |

|   |             |             |             |
|---|-------------|-------------|-------------|
| C | -5.88359800 | 2.58526300  | -0.52422500 |
| C | -5.88037900 | 1.58348400  | 0.45540200  |
| C | -0.75519100 | 12.20273200 | -0.55737000 |
| C | -4.88136600 | 1.58838200  | 1.40138100  |
| C | 5.00361600  | 11.28766200 | 6.06932900  |
| C | 5.48366300  | 15.01298800 | 4.86894400  |
| C | 6.52824300  | 14.08651300 | 4.84455900  |
| C | 7.51979800  | 14.17336000 | 5.79376300  |
| C | 5.48222800  | 16.01316200 | 5.84991900  |
| C | 6.47775800  | 16.00799000 | 6.79980900  |
| C | 10.24830100 | 14.17028700 | 10.54816400 |
| C | 11.24341000 | 14.08336200 | 11.49428200 |
| C | 12.28598600 | 15.01198400 | 11.46868000 |
| C | 12.28267800 | 16.01390700 | 10.48914800 |
| C | 11.28379600 | 16.00923500 | 9.54307200  |
| N | -1.36978000 | 7.76163000  | 3.64833100  |
| N | 2.99617900  | 11.19485900 | 4.15680800  |
| N | 1.91021500  | 2.73893500  | 7.05411800  |
| N | 2.80662400  | 1.85947100  | 7.11947000  |
| N | 3.69006100  | 1.13570400  | 7.29984500  |
| N | -3.87106500 | 2.49603700  | 1.38376100  |
| N | -3.68552700 | 10.54547600 | -1.57360100 |
| N | 3.40605900  | 6.40279400  | 6.78727600  |
| N | 9.19514000  | 6.16931800  | 12.45063900 |
| N | 10.08780200 | 7.05235200  | 12.51772400 |
| N | 10.96890900 | 7.77880900  | 12.69892400 |
| N | -6.87767100 | 2.73899700  | -1.50040500 |
| N | -7.77010800 | 1.85581600  | -1.56823700 |
| N | -8.65054400 | 1.12920600  | -1.75083500 |
| N | 3.59570800  | 15.73824000 | 3.82533200  |
| N | 2.71239800  | 16.46206300 | 3.64505500  |
| N | 4.49182700  | 14.85847300 | 3.89051600  |
| N | 5.99670100  | 11.44340700 | 7.04625900  |
| N | -1.08734400 | 2.49517100  | 4.16101100  |
| N | 6.89083900  | 10.56174900 | 7.11329400  |
| N | 7.77220900  | 9.83597600  | 7.29512200  |
| N | 6.18544900  | 6.41487800  | 9.56927200  |
| N | 7.48961800  | 15.10226600 | 6.78363000  |
| N | 10.27349300 | 15.10158500 | 9.56044500  |
| N | 0.40555000  | 6.15410700  | 3.89786200  |
| N | -4.56671100 | 9.81920100  | -1.75492900 |
| N | 0.21711000  | 11.18277100 | 1.37462200  |
| N | -2.79281500 | 11.42851200 | -1.50660100 |
| N | -0.48854300 | 7.03587800  | 3.83041600  |
| N | 13.28027400 | 14.85817200 | 12.44468100 |
| N | 14.17245500 | 15.74170500 | 12.51264500 |
| N | 15.05258500 | 16.46843300 | 12.69537500 |

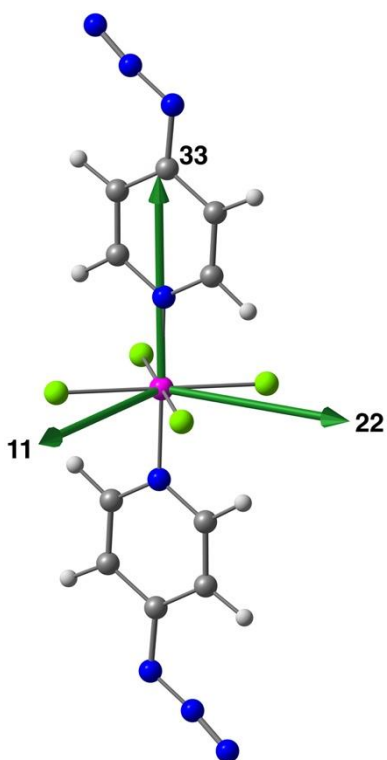

**Figure S14.** Graphical representation of the directions of the principal axes of the  $^{29}\text{Si}$  CSA tensor of the optimized molecular structure of **2'** ( $\delta_{11} > \delta_{22} > \delta_{33}$ ).

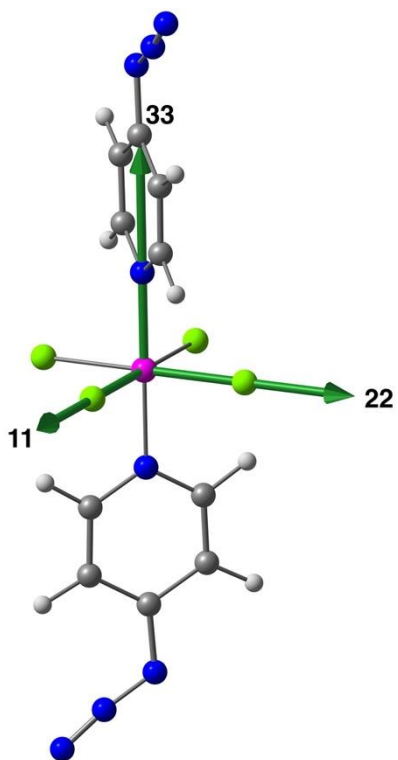

**Figure S15.** Graphical representation of the directions of the principal axes of the  $^{29}\text{Si}$  CSA tensor of the optimized molecular structure of **2''** ( $\delta_{11} > \delta_{22} > \delta_{33}$ ).

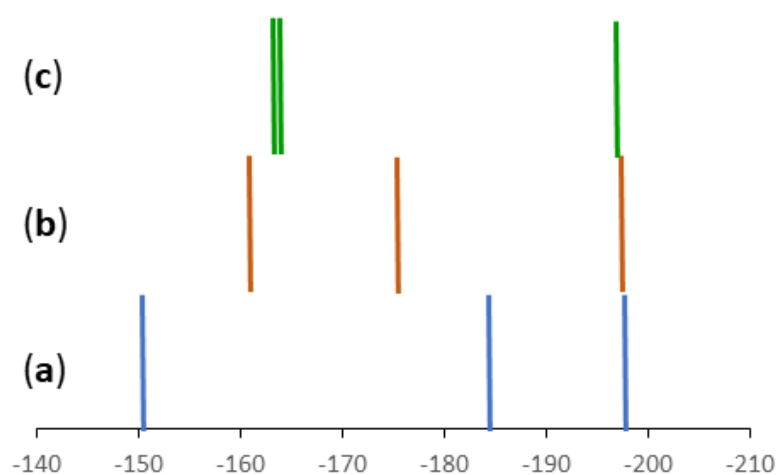

**Figure S16.** Graphical representation of the differences of the principal values of the  $^{29}\text{Si}$  CSA tensor of (a) **2'** (experimental data), (b) **2''** (experimental data) and (c) the optimized molecular structure of **2''** ( $\delta_{11} > \delta_{22} > \delta_{33}$ ).
